# Supplementary material for: Health professionals implicit bias of patients with low socioeconomic status (SES) and its effects on clinical decision-making: a scoping review
Source: PubMed Central journal article supplement — BMJ Open. 2024 Jul 2;14(7):e081723. doi: 10.1136/bmjopen-2023-081723 (PMC11227794; doi:10.1136/bmjopen-2023-081723), 2024-07-02
Supplement: bmjopen-2023-081723.draft_revisions.pdf [file bmjopen-2023-081723.draft_revisions.pdf]

# BMJ Open

BMJ Open is committed to open peer review. As part of this commitment we make the peer review history of every article we publish publicly available.

When an article is published we post the peer reviewers' comments and the authors' responses online. We also post the versions of the paper that were used during peer review. These are the versions that the peer review comments apply to.

The versions of the paper that follow are the versions that were submitted during the peer review process. They are not the versions of record or the final published versions. They should not be cited or distributed as the published version of this manuscript.

BMJ Open is an open access journal and the full, final, typeset and author-corrected version of record of the manuscript is available on our site with no access controls, subscription charges or pay-per-view fees (<http://bmjopen.bmj.com>).

If you have any questions on BMJ Open's open peer review process please email [info.bmjopen@bmj.com](mailto:info.bmjopen@bmj.com)

# BMJ Open

## Health Professionals implicit bias of patients with low socioeconomic status (SES) and its effects on clinical decision-making: A Systematic Scoping Review

|                               |                                                                                                                                                                                                                                                                                                         |
|-------------------------------|---------------------------------------------------------------------------------------------------------------------------------------------------------------------------------------------------------------------------------------------------------------------------------------------------------|
| Journal:                      | <i>BMJ Open</i>                                                                                                                                                                                                                                                                                         |
| Manuscript ID                 | bmjopen-2023-081723                                                                                                                                                                                                                                                                                     |
| Article Type:                 | Original research                                                                                                                                                                                                                                                                                       |
| Date Submitted by the Author: | 06-Nov-2023                                                                                                                                                                                                                                                                                             |
| Complete List of Authors:     | Job, Claire; Cardiff University; Cardiff University<br>Adenipekun, Bami; Cardiff University<br>Cleves, Ann; Cardiff University<br>Gill, Paul; Northumbria University, Department of Nursing, Midwifery and Health<br>Samuriwo, Ray; University of Bradford, School of Nursing and Healthcare Leadership |
| Keywords:                     | Clinical Decision-Making, Health Equity, Stereotyping, Systematic Review                                                                                                                                                                                                                                |
|                               |                                                                                                                                                                                                                                                                                                         |

SCHOLARONE™  
Manuscripts

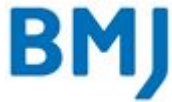

I, the Submitting Author has the right to grant and does grant on behalf of all authors of the Work (as defined in the below author licence), an exclusive licence and/or a non-exclusive licence for contributions from authors who are: i) UK Crown employees; ii) where BMJ has agreed a CC-BY licence shall apply, and/or iii) in accordance with the terms applicable for US Federal Government officers or employees acting as part of their official duties; on a worldwide, perpetual, irrevocable, royalty-free basis to BMJ Publishing Group Ltd ("BMJ") its licensees and where the relevant Journal is co-owned by BMJ to the co-owners of the Journal, to publish the Work in this journal and any other BMJ products and to exploit all rights, as set out in our [licence](#).

The Submitting Author accepts and understands that any supply made under these terms is made by BMJ to the Submitting Author unless you are acting as an employee on behalf of your employer or a postgraduate student of an affiliated institution which is paying any applicable article publishing charge ("APC") for Open Access articles. Where the Submitting Author wishes to make the Work available on an Open Access basis (and intends to pay the relevant APC), the terms of reuse of such Open Access shall be governed by a Creative Commons licence – details of these licences and which [Creative Commons](#) licence will apply to this Work are set out in our licence referred to above.

Other than as permitted in any relevant BMJ Author's Self Archiving Policies, I confirm this Work has not been accepted for publication elsewhere, is not being considered for publication elsewhere and does not duplicate material already published. I confirm all authors consent to publication of this Work and authorise the granting of this licence.

# Health Professionals implicit bias of patients with low socioeconomic status (SES) and its effects on clinical decision-making: A Systematic Scoping Review

Claire Job<sup>1\*</sup>, Bami Adenipekun<sup>2</sup>, Anne Cleves<sup>3</sup>, Paul Gill<sup>4</sup>, Ray Samuriwo<sup>5</sup>

## Claire Job

<sup>1</sup>School of Healthcare Sciences, Cardiff University; Cardiff, United Kingdom

## Bami Adenipekun

<sup>2</sup>Patient and Public Involvement Representative

## Anne Cleves

<sup>3</sup>Velindre University NHS Trust Library, Cardiff University Information Services. Velindre Cancer Centre Cardiff, United Kingdom

## Paul Gill

<sup>4</sup>Department of Nursing, Midwifery and Health, Northumbria University, Newcastle, United Kingdom.

## Ray Samuriwo

<sup>5</sup>School of Nursing and Healthcare Leadership, Faculty of Health Studies, University of Bradford; Bradford, United Kingdom

## Corresponding Author:

\*Claire Job, School of Healthcare Sciences, Cardiff University, United Kingdom

Email: [jobc@cardiff.ac.uk](mailto:jobc@cardiff.ac.uk)

**Word Count:** 7,800 words excluding abstract, tables, figures, references.

## Abstract

**Introduction:** Research indicates that people with lower socioeconomic status (SES) appear to receive inferior healthcare and experience worse health outcomes compared to those with higher SES, in part due to bias and prejudice. Implicit bias adversely affects healthcare related decision-making about assessment, investigations, and treatment options.

**Aim:** To scope the reported impact of Health Professional (HP) bias about SES on clinical decision-making and its effect on the care of adults with lower SES in the wider literature.

**Methods:** JBI scoping review methods were used to perform a systematic comprehensive search for literature on Medline, Embase, ASSIA, Scopus and CINAHL to identify relevant literature up to March 2023. The scoping review protocol has been published in BMJ Open. A patient and public interest representative was involved in the design and conduct of this review.

**Results:** Sixty-seven papers were included and were retained in the time frame 1975-2023. Sixty-nine percent of the papers demonstrate a link between implicit bias of SES and HP decision-making. Who the patient is as opposed to what they present has influence on HP decision-making. Stereotyping and bias often affect decision-making when the HP is fatigued or has high cognitive load. HP implicit bias can be mitigated through the assertiveness of the patient with low SES.

**Conclusions:** HPs hold implicit bias of people with low SES. HP decision-making about care for people of low SES is influenced at times by non-medical factors, assumptions, and stereotypes; a phenomenon that contributes to health inequalities. Practising self-awareness and considering different perspectives may help HP's overcome implicit bias when making decisions, especially when fatigued. Several priorities for further research are identified at the end of this scoping review.

## Key Words

Socioeconomic Status, Implicit Bias, Unconscious Bias, Socioeconomic Disparities, Healthcare Disparities, Clinical Decision-making, Healthcare Professionals, Scoping Review.

## Article Summary

### Strengths and limitations

- To the best of our knowledge, this the first scoping review exploring health professional implicit bias of SES and its influence on Health Professionals decision-making.
- This scoping review has an a-priori published protocol and has been conducted in line with international standards for best practice, to ensure rigor and transparency.
- The inclusion of a patient and public interest representative in the research team added quality to this review, by ensuring that the review is relevant, meaningful, and informed by the perspective of the people that access and utilise healthcare services.
- This work summarises the body of evidence in a clear concise manner, which highlights the patterns, advances, and gaps in what is known about this topic as well as the priorities for future research.
- Due to the nature of funding, only studies published in English were included and therefore this scoping review may have excluded relevant literature published in other languages.
- In keeping with the nature of a scoping review, the quality of literature collected was not evaluated.

## Introduction

Socioeconomic status (SES), a social determinant of health, is a key causative and contributory factor to disparities and inequities in morbidity as well as mortality in many nations<sup>(1-3)</sup>. There is a wide range of robust empirical evidence from many settings which indicates that people with lower SES tend to have a shorter life expectancy and worse health related outcomes in comparison to more affluent people<sup>(1-4)</sup>. People with higher socioeconomic status (SES) have better life chances, and thrive more than those in other socioeconomic groups<sup>(5-7)</sup>. The causes of the social gradient in health are complex, and the exact nature of the relationship is difficult to establish, because it is informed by both individual factors such as health behaviour but also factors associated with economic wealth<sup>(8-9)</sup>. The gradient in health and SES is also subject to a person's power, prestige, and the social connections they enhance<sup>(5)</sup>. Therefore, SES related healthcare disparities are influenced by how a person's SES is perceived by themselves and others<sup>(5-6)</sup>.

There is evidence that suggests the care people receive is subject to HP implicit bias arising from perceptions of patients with low SES<sup>(10)</sup>. Every person's thinking is shaped by lived experiences; interacting with people whose lived experience more closely reflects our own can lead people to using a favourable bias; just as unfavourable bias can be attributed to people whose life experience differs from one's own<sup>(11)</sup>. These biases are often subconscious or implicit and manifest in unthinking actions or ill-considered behaviours. HPs and patients hold implicit biases alike, which can influence the healthcare relationship, quality of patient experience and the decisions HPs make<sup>(9)</sup>. SES related implicit biases are reported to influence various aspects of health professional decision-making, such as patient assessment, deciding on investigations, and planning treatment<sup>(12)</sup>. Better understanding of the impact SES has on HP patient related decision-makings arguably provides a valuable new focus in tackling socio-economic health inequalities<sup>(8-9, 12)</sup>. Therefore, it would be prudent to undertake a scoping review that maps all pertinent evidence, integrates contemporary knowledge about this topic, clarifies key concepts, sets out evidence-based recommendations for practice and identifies the priorities for future research.

## Operational Definitions

It is important to define the concepts at the onset of this scoping review so that there is clarity about their use in this work. Our operational definitions are summarised in a Supplementary Figure and are set out in detail with their underpinning rationale in our protocol for this scoping review<sup>(13)</sup>.

## Aim

We sought to scope the reported impact of HP bias about SES on clinical decision-making and its effect on the care for people with lower SES in the wider literature. Our aim in this scoping review was to answer three related research questions:

- RQ1: What has been published about implicit SES bias and HP attitudes or behaviours when deciding and providing care?
- RQ2: How does SES effect the dynamics of the HP and patient relationship?
- RQ3: What recommendations for practice have been postulated, implemented, or evaluated to address HP implicit bias related to SES?

## Method

We conducted a scoping review using JBI methodology<sup>(16-17)</sup> as set out in our a-priori published protocol<sup>(13)</sup>, and report our results in line with the Preferred Reporting Items for Systematic Reviews and Meta-Analyses for Protocols and Scoping Reviews (PRISMA-ScR) guidelines<sup>(18-19)</sup>.

### Search strategy and data sources

Our literature search was carried out in three stages. In the first stage, an initial search was undertaken on Medline to identify and refine search terminology and consider Medical Subject Headings to ensure a comprehensive strategy that selected all the relevant papers published related to SES and its impact on health care. The Medline search strategy was tested, and the first 100 references scanned by three authors (AC, CJ, and RS) to ensure relevant papers were retrieved. Key papers were checked to confirm they were being retrieved by the search. In the second stage of the search process, the Medline search strategy was adapted for use on other key databases (Medline, Embase, ASSIA, Scopus, CINAHL) [see table 1] to account for differences in controlled vocabulary and database functionality. We also searched the website of key organisations such as professional regulatory bodies, think tanks and policy making bodies for any pertinent publications (see Supplementary Material – Search Strategy for details of the full search). In the final stage of the literature search, we conducted back and forward chaining of included papers to identify any other relevant documents. All searches have been updated since the initial search date, of 21<sup>st</sup> October 2021 and are up to date as of 9<sup>th</sup> March 2023.

Table 1: Table of Databases searched.

|                                                                                                                         |                                           |
|-------------------------------------------------------------------------------------------------------------------------|-------------------------------------------|
| <b>Date Restriction:</b> None                                                                                           | <b>Language Restriction:</b> English only |
| *The start date varies in each of the databases because these are the first available offered by each of the databases. |                                           |
| <b>Database name</b>                                                                                                    | <b>Dates Covered* Up to March 9 2023</b>  |
| Medline (OVID) & Epub & Medline in process (OVID)                                                                       | 1947 – present                            |
| Embase (OVID)                                                                                                           | 1946 – present                            |
| ASSIA (ProQuest)                                                                                                        | inception – present                       |
| Scopus (Elsevier)                                                                                                       | 1960 – present                            |
| CINAHL (EBSCO)                                                                                                          | 1976 – present                            |

### Screening and selection process

All retrieved citations were exported to the Rayyan systematic review software package and duplicates removed. In the first filter, the titles, and abstracts of the included papers were assessed against the inclusion criteria and independently filtered by two members of the project team (CJ and RS). Any differences with regards to the inclusion or exclusion, were resolved through discussion and after reviewing the full text of the papers in question. In the second filter, the full text papers were assessed against the inclusion and exclusion criteria. Our inclusion criteria are set out in Table 2, as per our protocol<sup>(13, 20)</sup>. We only included publications in English as this was an unfunded study with no facility for translation<sup>(13, 20)</sup>. Studies of all designs were included in this review because our focus was on mapping the evidence about the impact of HP bias of SES on clinical decision-making and its effect on the care for people with lower SES.

Table 2: Identification the Population Concept and Context

| Population                  | Concept                                                                                                                                                                                      | Context                                                                                                                                                                                                                  |
|-----------------------------|----------------------------------------------------------------------------------------------------------------------------------------------------------------------------------------------|--------------------------------------------------------------------------------------------------------------------------------------------------------------------------------------------------------------------------|
| ❖ People aged 18+ globally. | <ul style="list-style-type: none"> <li>❖ SES</li> <li>❖ Papers that discuss a Contributing factor of SES (such as education or income) as defined in the operational definitions.</li> </ul> | <ul style="list-style-type: none"> <li>❖ Health Professional (HP) implicit bias or unconscious bias and interactions with decision-making.</li> <li>❖ A Health Professional's (HP's) 'attitude' that connects</li> </ul> |



|                                                                                                                                                                              |                                                                                                                                                                                                                                                                                                                                                                                           |                                           |
|------------------------------------------------------------------------------------------------------------------------------------------------------------------------------|-------------------------------------------------------------------------------------------------------------------------------------------------------------------------------------------------------------------------------------------------------------------------------------------------------------------------------------------------------------------------------------------|-------------------------------------------|
|                                                                                                                                                                              | Please see the search strategy detailed in the supplementary material attached.                                                                                                                                                                                                                                                                                                           | Socioeconomic Status and decision-making. |
| <b>Design</b>                                                                                                                                                                |                                                                                                                                                                                                                                                                                                                                                                                           | <b>Setting</b>                            |
| <ul style="list-style-type: none"> <li>❖ Studies of all designs that include primary data including case studies.</li> <li>❖ Editorials</li> <li>❖ Opinion papers</li> </ul> | <ul style="list-style-type: none"> <li>❖ Any healthcare setting where a person is assessed and/or care planned by a health professional (HP) including:               <ul style="list-style-type: none"> <li>• Doctors and nurses</li> <li>• Physiotherapist and Occupational Therapists</li> <li>• Speech and Language Therapists</li> <li>• Pre-natal midwifery.</li> </ul> </li> </ul> |                                           |

### Data extraction and charting

Relevant data were gathered using an adapted version of the JBI data extraction tool systematic scoping reviews<sup>(20)</sup>, that was converted to an Access Database form. This Access database form was tested on the first five papers and then adapted as per JBI guidance to gather all information pertinent to the review questions<sup>(20)</sup>. On completion of data extraction, the data was exported to an Excel spreadsheet to facilitate data analysis. Our mapping and reporting of the data was also informed by the lived experience and perspective of the patient and public interest representative on our team (BA) as stated in our protocol<sup>(13, 21)</sup> and consistent with best practice in systematic reviews<sup>(21)</sup>.

## Results

### Selection of sources of evidence

The PRISMA flow diagram below (Figure 1) summarises how we searched for relevant publications and selected literature for inclusion, in line with best practice in scoping reviews<sup>(22)</sup>. Data analysis, interpretation, and reporting will be underpinned by the PAGER framework<sup>(23)</sup>.

Figure 1: Prisma Flow Diagram

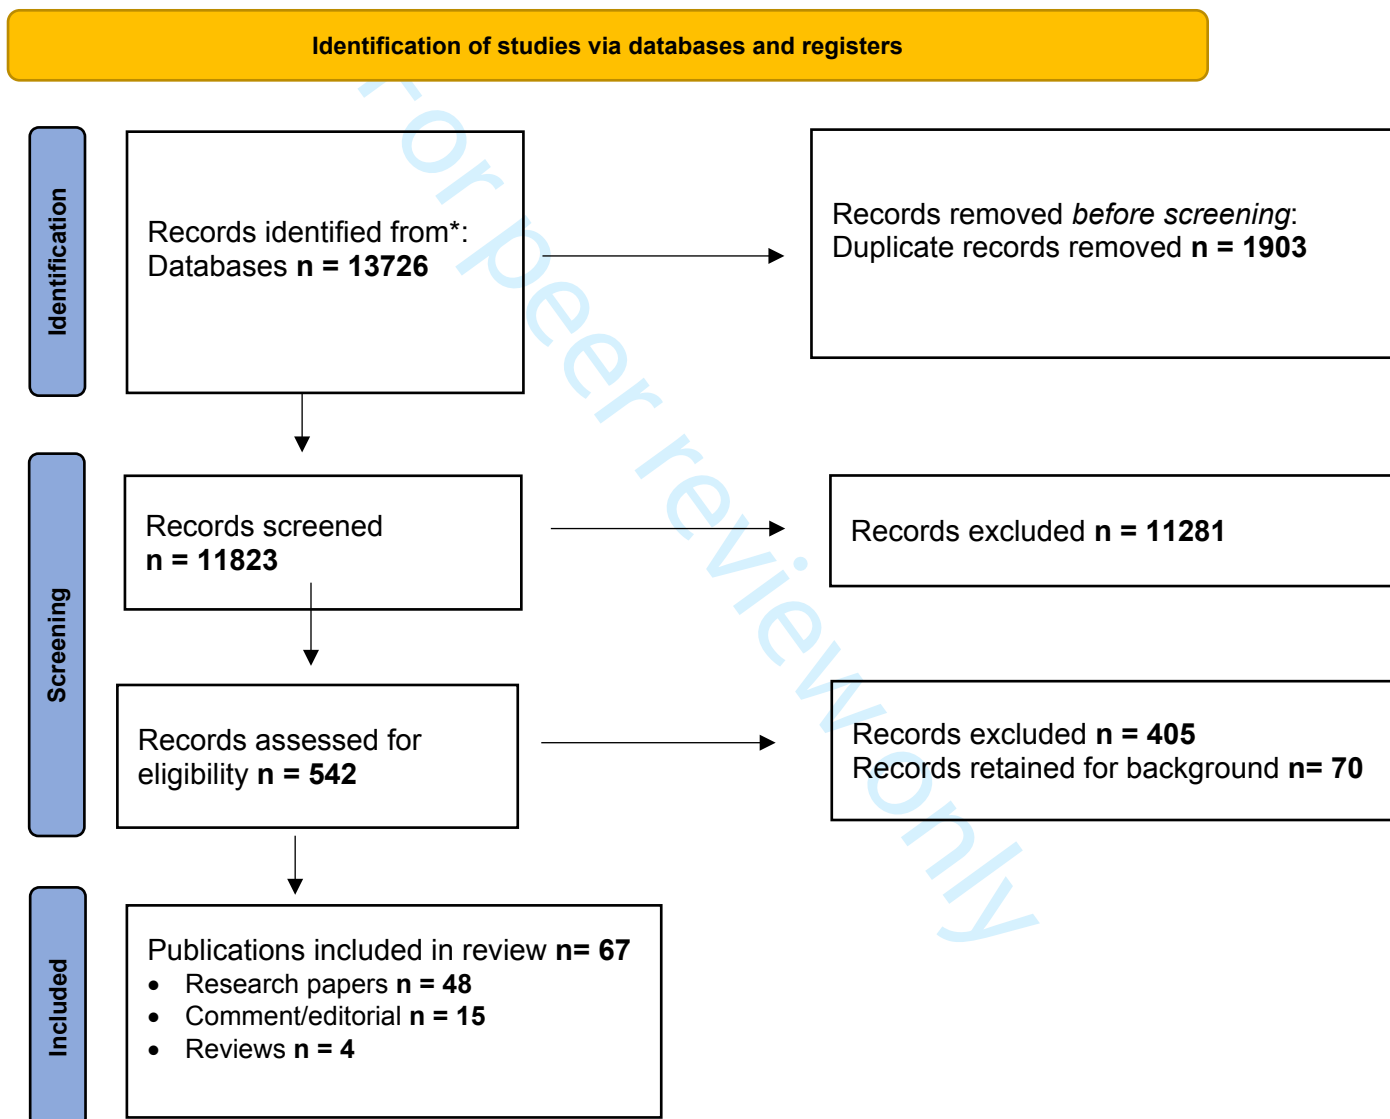

## Summary of characteristics

In our search strategy, we purposively cast a wide net to capture all relevant published papers, because of the complexity of defining SES and in total, we screened 11823 publications across different decades. At first filter, 11281 'off topic' papers were excluded, such as those concerned with children, dentistry, HP career development or focused on SES but not HP decision-making. We selected publications that considered HP decision-making from the HP's viewpoint and excluded papers that explored HP decision-making from the patient perspective.

We reviewed 542 studies for eligibility and retained 67 publications for inclusion in the scoping review. The characteristics of the publications included in this scoping review are presented in a Supplementary Table called Characteristics of Included Publications. Seventy papers were retained for background reading and synthesis, because they provided broader insights about the relationship(s) between stereotyping, bias, and SES. We included a wide range of publications in this review. Forty-eight of the 67 included papers (72%) reported on original research, while the remaining papers were commentaries or opinion pieces (n=15) and reviews (n=4) about aspects of SES and HP decision-making (Supplementary Table called Characteristics of Included Publications). Most included papers, were from the United States of America (67%; n= 45), followed by the United Kingdom (10%; n=7), Canada (6%; n=4) and Portugal (3%; n=2). Two papers involved authorship across national boundaries, and these were labelled as international (3%; n=2). The remaining included papers included involved a single published paper from Denmark, Finland, Mexico, New Zealand, Norway, Sweden, and Pakistan.

The earliest published included research paper retained was by Crane<sup>(24)</sup> in 1975, who explored the impact of social factors and physiological criteria in HPs treatment decisions about critically ill patients. Crane<sup>(24)</sup> explored doctor decision-making using case histories and questionnaires; she discovered that there were disparities in doctors' decision-making between a patient with a high-status occupation and another patient described as an unemployed labourer. Doctors in this study<sup>(24)</sup> offered more aggressive treatment options to people with high status occupations, even though they explicitly stated that they did not rate social status highly in their decision-making process. Crane<sup>(24)</sup> did not categorise this finding as implicit bias, which may reflect the prevailing socio-cultural beliefs at the time this study was conducted. However, in our view, this finding by Crane<sup>(24)</sup> is an example of implicit bias and the earliest research study we found. We also noted that from 2008 onwards, there was at least one publication about bias in relation to SES that met the inclusion criteria for this review. The increased frequency of publications from 2008 onward maybe a consequence of the emergence of the Fundamental Causes Theory<sup>(3)</sup> and a greater understanding of socioeconomic disparities in English healthcare provision facilitated by the Marmot Review<sup>(1)</sup>.

## Health Professionals

Thirty-one<sup>(9, 24- 53)</sup> of the 48 research papers reported on implicit bias in relation to Doctor/Physician clinical practice. The remaining papers explored or discussed decision-making from a multi-professional viewpoint (n=6)<sup>(54-59)</sup> and this included doctors, nurses or midwives working in multidisciplinary teams. Four research papers<sup>(60-63)</sup> explored nurse bias and decision-making, four involved medical students<sup>(64-67)</sup> and two papers<sup>(68-69)</sup> explored potential bias and decision-making of Psychotherapists/Counsellors. One study<sup>(70)</sup> was concerned with Occupational Therapists. The implicit bias in nurses and allied health professionals' practice is more evident in recent research studies which may reflects their increasingly central role in clinical healthcare decision-making. We found no studies that explored implicit bias in Pharmacists' decision making. This was a surprise as clinical decision-making is a fundamental aspect of pharmaceutical practice especially in settings such as the UK, where pharmacists have extended roles as non-medical prescribers and must be able assess, diagnose, and treat patients<sup>(71-74)</sup>.

## Research Methods

Included primary research papers employed several different methodological approaches (see Supplementary Table called Characteristics of Included Publications). Most research papers (50%, n=24) of used a vignette approach<sup>(24, 26-28, 30, 31, 33, 35, 38, 42, 45-47, 50, 51, 58, 61-65, 67, 69, 70)</sup> and some combined the vignette approach with the Implicit Association Test (n=6)<sup>(45-47, 51, 61, 65)</sup>. Some studies used prospective data collection (n=2)<sup>(59, 61)</sup>, High Fidelity simulation (n=1)<sup>(66)</sup>, retrospective data review (n=3)<sup>(40, 48, 57)</sup> quantitative survey/questionnaire (n=8)<sup>(9, 24, 34, 39, 44, 47, 60, 68)</sup>, qualitative interview (n=10)<sup>(29, 32, 36, 41-43, 49, 54-56)</sup>, or a qualitative observational approach (n=2)<sup>(43, 55)</sup>.

Vignette studies illustrated the clinical scenario through a video recording (n=11)<sup>(26-28, 30, 33, 42, 50, 58, 62, 63, 69)</sup>, while others used a combination of written case examples and written scenarios with pictures depicting the clinical cases (n=13)<sup>(24, 31, 35, 38, 45-47, 51, 61, 64, 65, 67, 70)</sup> Representations of SES were indicated based on appearance of the patient, such as how they dressed and/or the description of the person which indicated their occupation. In studies that retrospectively or prospectively examined health data, health insurance status, or area level deprivation measures were applied to patient demographic information to measure the SES of the population.

## SES and HP Decision-making

Thirty-four of included primary research studies (69%) reported an association between SES and HP decision-making<sup>(9, 24-26, 28, 29, 31, 32, 34-36, 38, 40, 42-44, 47-52, 54-58, 60, 62, 63, 64, 66-68)</sup>. Meaning that in over two-thirds of the research papers reviewed HP decision-making about assessment, investigations, treatment, or care was influenced by a person's socioeconomic status. Fourteen papers did not detect any SES related bias in HP decision-making<sup>(27, 30, 33, 37, 39, 41, 45, 46, 53, 59, 61, 65, 69, 70)</sup>. There were no discernible patterns or trends in the characteristics of these 15 papers, which used a variety of methodologies, involved different HPs across a range of specialty settings. Interestingly, four papers by Haider et al<sup>(45, 46, 61, 65)</sup> did not find a link between SES and decision-making, but detected high levels of implicit favourable bias towards people with high SES, in doctors<sup>(45, 46)</sup>, nurses<sup>(61)</sup> and medical students<sup>(65)</sup>. All these studies<sup>(45, 46, 61, 65)</sup> combined the Implicit Association Test (IAT) and a vignette-based approach to assess the impact of implicit bias on decision-making. Three of these studies reported that 90.7% of doctors (n=215)<sup>(45)</sup>, 93% of nurses (n=245)<sup>(61)</sup> and 86% of medical students (n=211)<sup>(65)</sup> demonstrated an implicit preference toward people with High SES. However, in these studies<sup>(45, 61, 65)</sup>, the high levels of implicit SES bias were not evident in HP's decision-making. This result suggests that not all implicit bias leads to disparities in decision-making.

Table four below displays the research that links SES and decision-making by professional group. Three quarters of the research papers demonstrate a link between SES and decision-making in doctors (n=23)<sup>(9, 24-26, (28, 29, 31, 32, 34-36, 38, 40-44, 47-52)</sup>, medical students (n=3)<sup>(64, 66, 67)</sup> and nurses (n=3)<sup>60, 62, 63)</sup>. Half of the studies with multi-professional participants demonstrated a link between SES and decision-making (n=3)<sup>(54, 56, 57)</sup>. There was not enough data within the included studies that focused on Occupational Therapists and Psychological Therapists, to draw any meaningful conclusions about the relationship between implicit SES bias, and their decision-making (Table 3).

Table 3: Link between SES and HP decision-making per professional group (research papers)

| Professional Group      | Link found | No link found | link found | Grand Total |
|-------------------------|------------|---------------|------------|-------------|
| Doctor                  | n=23       | n=8           | 74%        | n=31        |
| Medical student         | n=3        | n=1           | 75%        | n=4         |
| Multi-professional      | n=3        | n=3           | 50%        | n=6         |
| Nurse                   | n=3        | n=1           | 75%        | n=4         |
| Occupational Therapist  | n=0        | n=1           | 0%         | n=1         |
| Psychological Therapist | n=1        | n=1           | 50%        | n=2         |
| Grand Total             | n=33       | n=15          | 69%        | n=48        |

In our included research publications, we identified that there were some medical specialities in which there were three or more research studies exploring SES related implicit bias in HP decision-making (see Table 4). Every included study (n=7; 100%) on pain assessment and/or management<sup>(38, 50, 51, 58, 60, 62, 63)</sup> reported a link between decision-making and SES. In obstetric/contraception care 60% (n=3) reported a link between implicit SES bias and HP decision-making<sup>(40, 54, 56)</sup>. More than three quarters of the studies involving cancer care (n=6; 75%)<sup>(26, 28, 35, 48, 49, 64)</sup> and all but one study (n=7; 87.5%)<sup>(9, 25, 32, 34, 47, 57, 66)</sup> exploring coronary heart disease (CHD) detected disparities in HP decision-making related to SES. Three of the nine papers that explored multiple conditions detected a link between SES and decision-making<sup>(36, 43, 44)</sup>. One of the two included research papers on diabetes<sup>(42)</sup> and mental health<sup>(68)</sup> found a link between SES and decision-making. The two studies exploring SES and decision-making in trauma care did not detect a link between SES and decision-making<sup>(45, 46)</sup>. Other specialities listed in table five a single research paper was included; asthma<sup>(52)</sup>, dermatology<sup>(41)</sup>, kidney transplantation<sup>(29)</sup>, palliative care<sup>(24)</sup> and sickle cell disease<sup>(67)</sup>.

Table 4: Link between SES and HP decision-making per specialty (research papers)

| Condition                | Link Found | No Link found | Link Found | Total |
|--------------------------|------------|---------------|------------|-------|
| Cancer Care              | n=6        | n=2           | 78%        | n=8   |
| Multiple Conditions      | n=3        | n=6           | 38%        | n=9   |
| Coronary Heart Disease   | n=7        | n=1           | 86%        | n=8   |
| Pain Assess/Management   | n=7        | n=0           | 100%       | n=7   |
| Obstetrics/Contraception | n=3        | n=2           | 60%        | n=5   |
| Diabetes                 | n=1        | n=1           | 50%        | n=2   |
| Mental Health            | n=1        | n=1           | 50%        | n=2   |
| Trauma                   | n=0        | n=2           | 0%         | n=2   |
| Asthma                   | n=1        | n=0           | 100%       | n=1   |
| Dermatology              | n=1        | n=0           | 100%       | n=1   |
| Kidney Transplantation   | n=1        | n=0           | 100%       | n=1   |
| Palliative Care          | n=1        | n=0           | 100%       | n=1   |
| Sickle Cell Disease      | n=1        | n=0           | 100%       | n=1   |
| Total                    | 33         | 15            | -          | 48    |

## Discussion

As far as we are aware, this scoping review is the first to scope wider literature about the reported impact of HP SES related bias on clinical decision-making, through a comprehensive and systematic search of all the available evidence. This pioneering scoping review has generated key insights into what has been published about HP implicit SES bias, and how it affects HPs attitudes or behaviours as they make decisions about the provision of care for patients. In addition, this scoping review has also revealed how SES can affect the interpersonal dynamics of the HP and patient/service user in their relationship during care delivery. This scoping review has identified strategies, techniques, and recommendations that have postulated, implemented and/or evaluated to address implicit SES bias in HP clinical decision-making. The insights that have been generated from the scoping review can be used to inform efforts to ensure that everyone receives safe high-quality, person-centred, evidence-based care in a just and equitable manner from every HP that they encounter.

### *Types of publications*

The results of this scoping highlighted various aspects of what has been published about implicit SES bias and HP attitudes or behaviours when deciding and providing care. Firstly, the vast majority of the 67 publications included in

1 this scoping review were original research studies (n=48, 72%), with the remainder being reviews, commentaries,  
2 and opinion papers (n=19, 28%). This indicates that there has been a greater focus on building the evidence on this  
3 topic by focusing on conducting primary research relative to preparing other types of papers which provide useful  
4 and complementary insights. An alternative perspective to consider is that publications such as commentaries,  
5 opinion papers, and editorials often contain useful tacit insights and wisdom that constitute '*fugitive knowledge*' or  
6 '*soft intelligence*' as they exist beyond formal knowledge structures, because this information is risky to know and  
7 share with others through conventional mechanisms<sup>(75-77)</sup>. Therefore, these valuable insights are challenging to  
8 establish and understand using conventional research approaches. So, they may be scope to encourage the  
9 publication different types of papers on this topic to facilitate a better understanding of how the SES related  
10 perceptions, views, or beliefs of a HP impact on their clinical decision-making in a manner that reflects the reality of  
11 healthcare which is delivered in complex adaptive systems.  
12  
13  
14

### 15 *Geographical location*

16 Many of the papers in this scoping review were authored by people based in the global north, specifically North  
17 America and Europe from 1995 onward (n=61, 91%), with the remainder being written by an international team of  
18 authors or people based in other parts of the world. This may be an indication of the impact that seminal  
19 publications such as the Fundamental Causes Theory<sup>(3)</sup> and Marmot Review<sup>(1)</sup> have had in highlighting the  
20 relationship between lower SES, health inequalities and poor health related outcomes in these parts of the world. It  
21 is also possible that the higher number of publications in these regions may reflect that there is greater scope to  
22 access funding for research on the relationship between implicit SES bias and HP's clinical decision-making within  
23 these settings. Then, it would be apt for more multinational research on the relationship between implicit SES bias  
24 and HP's clinical decision-making within especially those that are low and middle income, or described as developing  
25 and transitional, so there is a better understanding of this issue across nations especially those that are in the global  
26 south.  
27  
28  
29  
30  
31  
32

### 33 *Types of HP*

34 It is also worth noting that just under two thirds (n=31)<sup>(9, 24-53)</sup> of research papers on HP implicit SES bias and  
35 decision-making focused doctors/physicians' decision-making, with significantly less studies focusing on  
36 interprofessional or multidisciplinary teams (n=6)<sup>(54-59)</sup>, nurses (n=4)<sup>(60-63)</sup>, and medical students (n=4)<sup>(64-67)</sup>. The  
37 number of papers exploring decisions made by 'non-medical' HPs gains increasing interest in the literature after  
38 2008 and reflects the changing landscape of healthcare decision-making, and the extended role of Nurses and Allied  
39 HPs. The lower number of research papers exploring decisions made by non-medical HPs may also be an indication  
40 of the perceived importance of different healthcare professionals in patient care by those who fund research. The  
41 empirical evidence at hand indicates that more is known about doctors/physicians' implicit SES biases and its  
42 consequences with regards to their decision-making in other profession. Given the global shift toward more plural  
43 approaches to healthcare delivery in which other HPs have extended roles, such as non-medical prescribing, there  
44 needs to be greater focus in future research that explores any link between SES and decision-making of other  
45 professionals in healthcare and its consequences for patient care.  
46  
47  
48  
49  
50  
51

### 52 *Research Methods*

53 Our results indicate that the association between HP implicit SES bias and their decision-making has been examined  
54 using a variety of different research methods. However, half of the studies (50%; n=24)<sup>(24, 26-28, 30,31, 33, 35, 38, 42, 45-47, 50, 51,  
55 58, 61-65, 67, 69, 70)</sup> utilised a vignette approach which used a video recording, or combined written case exemplars,  
56 scenarios, and images of different types of people. Some studies (n=6)<sup>(45-47, 51, 61, 65)</sup> used the Implicit Association Test  
57 (IAT) to gather data regarding the participants favourable bias as a precursor to vignette examination of decision-  
58 making. Regardless of the research method used, in most studies, the information provided to the participants with  
59  
60

regards to SES was predicated on the patient's visual appearance such as the clothes that they were wearing, or how they were described which provided an insight into their profession, and or education.

Given the preponderance of vignette based research on this topic, it is prudent to consider its utility in understanding HP decision-making. Vignette studies are adept at establishing judgement and decision-making in a variety of professions, which have a high level of applicability and generalisability about how HPs undertake their work on a day to day basis<sup>(78, 79)</sup>. In addition, vignette studies are an effective way of exploring people's beliefs, perceptions, attitudes, behaviour, and biases<sup>(79-82)</sup>. However, the utility of this approach in decision-making studies is contingent on the researcher's ability to craft and word a written or visual vignette that reflects the complex nature of reality, and that sets out key information in line with best scientific practice<sup>(78-80, 83)</sup>. A key issue with the use of vignettes in research is that the information that they contain and convey, may subconsciously relay, or reflect the researchers' own perspectives and/or biases, which may influence the information they provide, as well as how they describe others in the scenarios that they create. Hence, it is widely recommended that the vignettes are evidence-based, reviewed by expert peers, or patients, and subsequently pilot tested ensure that they are valid, culturally appropriate, and clear before they are used in a study<sup>(78, 80, 84)</sup>. Equally, others<sup>(85)</sup> have opted to co-create vignettes with members of the population they research to ensure that they are culturally relevant, utilise the appropriate terms, and convey the perspective(s) of the people who are being characterised therein.

There is scope for the greater use of other research approaches such as high-fidelity simulation, prospective data collection, qualitative interviews, qualitative observation, quantitative surveys or questionnaires, and retrospective data reviews in studies on this topic. Conducting future research which uses some of these less commonly used approaches, on their own or in combination may shed new light on hitherto unknown or overlooked aspects of HP implicit SES related bias. This is particularly important as each research method has its own strengths and weaknesses, so using a combination of different approaches facilitates data triangulation, which can lead to more meaningful insights, enhance methodological rigour, and help to draw more robust conclusions from the data.

### *Measures of SES*

When developing the protocol for this study we made the decision to include proxy measures of SES and in retrospect this was an important decision. When exploring HP decision-making a number of proxy measures or indicators of SES have been utilised in the included research papers. Included papers used proxy measures such as occupation/Employment (n=15)<sup>(24, 30-33, 43, 47, 50, 51, 60, 61, 64-66, 70)</sup>, Education (n=14)<sup>(9, 29, 36, 37, 39-41, 45, 49, 57-59, 62, 70)</sup>, Income/Finances (n=11)<sup>(9, 25, 35, 48, 50, 51, 53-55, 57, 59, 55)</sup>, appearance/dress (n=7)<sup>(26, 30, 33, 42, 63, 66, 69)</sup>, Health Insurance (n=3)<sup>(25, 26, 34)</sup>. A Formal SES or deprivation measure was used in only three of the studies included in this review<sup>(9, 44, 48)</sup>. We are aware that the inclusion of papers with single discrete measures such as these may be contested from a social science perspective, as SES is invariably multifaceted and complex<sup>(13)</sup>. A comprehensive discussion about the utility or otherwise of different discrete or proxy measures is beyond the remit of this paper, but there are some constraints to the use of some discrete measures such as income as a proxy for SES. The results of this scoping review support our view<sup>(13)</sup> that proxy measures for SES, albeit with their limitations, can provide useful insights into HP implicit bias and its sequelae for their clinical decision-making about patient care. Therefore, by mapping the different methods that are used to measure and report SES in different types of publications, it is hoped that there is a clear overview of how they have been utilised in different contexts.

### *Bias and Stereotyping*

HPs make different judgements or decisions about assessment, treatment and care based on who the patient is, as opposed to what they present with<sup>(42)</sup>. Three examples of this are highlighted below drawing on the evidence pertaining to pain assessment/management, maternity/contraception care and cardiac care. Wilson<sup>(60)</sup>, Anastas<sup>(51)</sup>, and Brandao et al.'s<sup>(62)</sup> studies highlight stereotyping as an influence in HP behaviour and decision-making. Brandao<sup>(62)</sup> reported that people with low SES were viewed as less credible during pain assessment by a HP.

1 Anastas<sup>(51)</sup> and Wilson's<sup>(60)</sup> studies both found that people with low SES were often viewed as being untrustworthy  
2 and incapable during pain assessment, which led to disproportionate concerns about possible opioid addiction and  
3 triggered 'gate keeping' behaviours in the HP and this affected pain management decisions. Stereotyping and bias  
4 were also reported in maternity and family planning studies<sup>(43, 55, 56)</sup>. Manzer<sup>(56)</sup>, Smith-Oka<sup>(55)</sup> and Shawahna's<sup>(43)</sup>  
5 studies identified the adverse impact of stereotyping on HPs assessment and decision-making. In these studies HPs  
6 considered women with low SES to be untrustworthy, bad mothers and/or promiscuous, as well as lacking capacity  
7 to make sensible decisions about planning future pregnancies<sup>(43, 55, 56)</sup>. Manzer<sup>(56)</sup>, Smith-Oka<sup>(55)</sup> and Shawahna<sup>(43)</sup>  
8 studies also reported that women with low SES were subject to biased disparities in advice, guidance, and  
9 management that nudged women toward using longer term (and on occasions irreversible) contraceptive options.  
10 Agerstrom et al<sup>(57)</sup> found that people with low SES were more likely to receive delays in cardiac arrest care compared  
11 to patients with higher SES. In this study<sup>(57)</sup>, the results revealed that highly educated patients ( $P < 0.001$ ) and  
12 patients with higher income ( $P = 0.001$ ) were significantly more likely to have their heart rhythm monitored prior to  
13 the onset of the cardiac arrest (holding all other variables). Heart rhythm monitoring was significantly associated  
14 with less delay, shorter duration, increased immediate survival and 30-day survival<sup>(57)</sup>. In this instance, SES related  
15 discrimination was associated with HP decision-making about who gets cardiac monitoring, which impacted on  
16 timely cardiac arrest care and patient survival. Goddu et al.'s<sup>(67)</sup> study highlights that perceptions and stereotyping  
17 amongst HPs can be triggered prior of in-person meetings with patients through language and words used in medical  
18 records or referral letters. This suggests that SES related stigma and bias can unwittingly be transmitted among HPs  
19 through the words and language that are used to characterise the person receiving care as well as to describe their  
20 lived experience. Therefore, the words, terminology, and language in reference to the people seeking or receiving  
21 care seem to be a key influence and, in some cases, a predeterminant of HP attitudes and behaviour that can  
22 adversely affect clinical outcomes.

23  
24  
25  
26  
27  
28  
29  
30 Social psychologists describe two fundamental dimensions of social perception when considering bias and  
31 stereotyping that help us to understand how people see each other<sup>(86)</sup>. The stereotype content model (SCM) was  
32 first proposed by Fiske<sup>(87, 88)</sup> and provides a theory that explains how individuals form impressions, assumptions, and  
33 judgements of other individuals or groups based on their perceived warmth or capability. This theory is useful when  
34 making sense of the biases that might be impacting on HP interaction with patients and when making decisions<sup>(86)</sup>.  
35 The first dimension of the SCM relates to the **warmth** of a person, for example, how friendly or trustworthy they  
36 appear to be<sup>(88)</sup>. A person who is cooperative is deemed warm, and a person who is perceived as resistant is  
37 perceived as cold<sup>(86)</sup>. The second dimension relates to the **capability** of the person, for example, how skilled,  
38 intelligent, or competent they appear<sup>(86)</sup>. Warmth is evaluated first because it predicts future behaviour; capability is  
39 judged more slowly as it reflects the other person's ability to act competently<sup>(88)</sup>. In terms of SES or social class, for  
40 example, wealthier people are stereotyped as intelligent and better educated, therefore more capable than poorer  
41 people of lower SES or class<sup>(89)</sup>. SES can be signalled in many ways, the way a person dresses, their mannerisms or  
42 their accent, and these cues lead to behaviour changes that impact on the interaction between people<sup>(89)</sup>. The  
43 interaction between people is a dynamic process in the context of healthcare, so HPs make conscious and  
44 subconscious judgements about the other person, while simultaneously, the person seeking, or receiving healthcare  
45 makes similar judgements about the HP, this is then manifest through dialogue and influences how they see each  
46 other. Stereotypes do not need to be consciously recognised to generate discrimination, they can be subconsciously  
47 held, and triggered in such a way that people use them to frame their actions and to rationalise what they do, or do  
48 not do, in an automatic process with little or no thought or self-awareness<sup>(90)</sup>. Consequently, SES related stereotypes  
49 seem to be a contributing factor that maintain health inequalities, given that HP decision-making appears to lead to  
50 unwarranted variations in care and treatment<sup>(42)</sup>.



### *Time and cognitive load*

A recurring theme is the reported influence of HP workload on implicit bias and decision-making. There is evidence to suggest that HPs rely on implicit messages to 'fill the gaps' in comprehensive assessment when time and effortful thought are limited or prevented. Several papers<sup>(11, 54, 91, 92)</sup> suggest that the contribution of cognitive load, stress and limited time-restraints impact on the HP's motivation to suppress implicit bias when making decisions. Self-awareness of one's own prejudice and bias is important when making decisions, but self-awareness is diminished when the HP is busy and does not have sufficient head space to mitigate the impact of potential implicit bias<sup>(93)</sup>. Decision-making is ideally a controlled process which involves making intentional, conscious, and effortful thought<sup>(93)</sup>. However, if the HP is engaged in high levels of mental activity, is stressed or has limited time, then this can interrupt, impair or prevent a controlled thoughtful decision<sup>(93)</sup>. In these circumstances stereotyping is used as an energy saving mechanism that allows for intellectual shortcuts in decision-making that feel comfortable because they fit with what we think we know<sup>(11)</sup>. Therefore, HPs are less patient-centred in these circumstances and the unique features of the patient (which are discovered during comprehensive assessment) can be replaced with stereotypical patterns based on the patient belonging to a certain social group/s<sup>(11, 92, 93)</sup>. Brown<sup>(54)</sup> discovered that HPs took greater effort to ensure the confidentiality of the HIV diagnosis was protected for women with high SES. The HPs in the Brown study<sup>(54)</sup> considered confidentiality to be less of a priority for the women with low SES because their social position was less important. Brown<sup>(54)</sup> discovered that this bias tended to be activated when staff were overburdened and/or where health services were poorly resourced. There is also evidence that shows stereotyping can assist in coping with the pressures of HP practice<sup>(94)</sup>. Spending less time with patients with low SES may be perceived as helping to 'move clinics along,' because of the HP assumption that some people will not need as long as other people in clinic. Patients with low levels of SES, can often be viewed as needing less information because of an assumption they do not wish to be informed, because they ask less questions or because they do not have the capacity to retain information, and this assumption actually helps the clinic to regain lost time<sup>(94)</sup>.

### *Intersectionality of SES and other factors*

Intersectionality refers to the interactivity of different social identity structures such as race, class and gender, and how belonging to more than one social identity group can have a greater negative effect than belonging to one group alone<sup>(95, 96)</sup>. Our results show that intersectionality can have a powerful cumulative effect on HP assessment and subsequent decision-making. Stereotypes and prejudices are stackable and the proclivity towards discriminatory attitudes, tendencies, and behaviours rises as perceived vulnerability of the person seeking or receiving care increase<sup>(96)</sup>. Denburg et al<sup>(35)</sup> explored race and social vulnerability for men with localised prostate cancer and discovered that the higher the perceived patient vulnerability by the HP, the more likely they were to opt for 'watchful waiting' as opposed to active treatment. For example, men who were deemed to have a low income, were widowed, or were characterised as being black by HPs, were the least likely to be referred for radical prostatectomy. McKinlay et al<sup>(25)</sup> explored non-medical influences on HP decision-making for patients with coronary heart disease and found that discriminatory attitudes and behaviours were linked to the patient's age, perceived level of income, and insurance status. Older adults with low income and without medical insurance were less likely to receive a primary cardiac diagnosis, however this discrimination did not affect younger patients who were low income and without insurance<sup>(25)</sup>. Fitzgerald's<sup>(96)</sup> systematic review which explored implicit bias in healthcare professionals, highlighted how perceptions relating to race, SES, and gender intersect, but also interact in complex ways. The intersectional interaction between different factors is arguably a reflection of the continuous nature of perceived warmth and capability matrix as previously described in the SCM, but the outcome for the patient can be bleaker when racial and class biases stereotypes overlap<sup>(89)</sup>. Our results about the complex intersection of SES and other factors such as race are consistent with wider evidence from other studies. For example, there is evidence which shows that controlling for SES, people who are of Afro-Caribbean heritage are three times more likely to be diagnosed with diabetes than their counterparts of European heritage, while people who are Lesbian, Gay, Bisexual,

1 Transgender or identify as Queer are more likely to have multiple risk for cardiovascular disease than their  
2 heterosexual peers<sup>(4)</sup>. The evidence collected on intersectionality in this review demonstrates the importance of  
3 multivariable reviews of implicit bias, therefore exploring SES, race, age, or gender as individual factors in isolation  
4 will not tell the whole story. Instead, the intersectionality the distinctive characteristics, and traits that a person has  
5 as well as the social groupings that they belong to must be considered, especially given their complex interactions  
6 and cumulative effect on the care of patients is the correct way forward when we seek to understand patient  
7 experience.  
8

### 9 *SES and HP Decision-making*

10 Dialogue plays a key role in how we see each other<sup>(97)</sup>. Initial impressions of both the HP and patient can be  
11 corrected through interaction between both parties<sup>(98)</sup>. Initial impressions of warmth and competence can be  
12 adjusted through dialogue during the assessment and decision-making process. This interaction however requires  
13 motivation for one or other party<sup>(28)</sup>. A motivated HP who offers more time, seeks the input of the patient, and  
14 consciously considers equality and/or equity can build a dialogue with the person based on 'what matters most to  
15 them'<sup>(97)</sup>. In the same way a patient who demonstrates existing knowledge and has an active or assertive manner in  
16 dialogue with the HP can influence the HP decision-making by altering the HPs assumptions related to the warmth or  
17 competence of the patient<sup>(28)</sup>.  
18  
19  
20  
21  
22

23 Manderbacka<sup>(32)</sup> exploration of decision-making in relation to 'white collar' and 'blue collar' patients found that  
24 doctors were more likely to take a 'doctor-centred model' for communication, assessment and decision-making with  
25 patients from a 'blue collar' background, but tended to adopt a 'person-centred and shared decision-making model'  
26 with 'white collar' background patients. It is not always the case that a person who is inferred as capable is  
27 automatically also perceived as warm on the SCM matrix<sup>(99)</sup>, in fact some research has shown that when a person is  
28 viewed as capable and competent then the perception of warmth is viewed less positively<sup>(86, 88, 99)</sup>. This can mean  
29 that when a patient is perceived as lacking capability or competence then their warmth can be viewed more  
30 positively as a compensatory effect, which in turn triggers a greater paternalistic behaviour from the HP, that effects  
31 their communication style and quality<sup>(99)</sup>. Castaneda-Guarderas et al<sup>(100)</sup> and Krupat et al<sup>(28)</sup> assert that the perceived  
32 power differential between the HP and the patient can inhibits shared decision-making because it negatively effects  
33 patient trust<sup>(100)</sup>. Patients are less likely to participate in dialogue and shared decision-making if they perceive the HP  
34 as judgemental, in this way HP bias can trigger the patient's bias in a dynamic way, adversely affecting dialogue and  
35 patient centred care<sup>(28)</sup>.  
36  
37  
38  
39

40 Patient assertiveness can lead to more careful diagnostic testing for people who may have been otherwise  
41 disadvantaged because of their SES<sup>(34)</sup>. Barnhart et al<sup>(34)</sup> explored non-medical reasons for disparities in coronary  
42 heart disease treatments and discovered that if patients with low SES adopted a health assertive manner, then their  
43 treatment recommendations (revascularisation) more closely mirrored patients who had high SES. Krupat et al<sup>(28)</sup>  
44 explored the effect of patient assertiveness HP decision-making for older adults with breast cancer and similarly  
45 discovered that patients with low SES were more likely to have full staging of their cancer investigated when they  
46 made assertive requests. In both these studies<sup>(28, 34)</sup> patient assertiveness led to more careful diagnostic testing for  
47 people who may have been otherwise disadvantaged because of their SES. Therefore, there is empirical evidence  
48 which suggests that implicit SES bias can manifest itself in HP-patient behaviours that impede relationship building,  
49 which could be mitigated with greater HP self-awareness and greater patient assertiveness<sup>(28, 34, 97)</sup>. Further research  
50 is needed to explore the impact of patient assertive requests on HP decision making. Such work is urgently needed  
51 to prevent or reduce healthcare inequalities arising from HPs SES related implicit bias, has added importance given  
52 the tacit nature of the latter. It is increasingly recognised any such improvement efforts that seek to address health  
53 inequalities, such as those caused HPs implicit SES bias, must involve meaningful co-production and dialogue about  
54 health inequalities that enables and empowers people to have agency and to take action<sup>(101)</sup>.  
55  
56  
57  
58  
59  
60

### *Measures to address HP implicit bias related to SES.*

We integrated a range of recommendations from included publications into three main themes: further research, education/training and policy, and guidelines. The reviewed papers highlight the need for further research to explore in more detail the reasons and mechanisms in which social factors affect and influence HP decision-making<sup>(31, 32, 37, 39, 41, 48, 51, 52, 62)</sup>. There is a gap in understanding mechanisms that prevent or inhibit the implicit judgment surfacing as explicit actions, particularly related to HP time and cognitive load<sup>(39, 93)</sup>. Hence, this gap in understanding is a key priority for any future research and improvement efforts that seek to address HPs SES related decision-making and its negative impact on patient care.

Another recommendation arising from the reviewed papers is the exploration of education and training for both HPs and patient groups which seeks to increase HP self-awareness through perspective taking and/or help patients with health literacy and assertiveness<sup>(9, 28, 34, 38, 47, 49, 50, 55, 56, 62, 64, 66)</sup>. There appears to be a gap in the evidence that requires further exploration, specifically, there are as yet unanswered questions about how training can successfully raise awareness of SES bias, and how the impact of this training on clinical practice can be assessed or evaluated in the short term and longer term<sup>(102)</sup>. The impact of health literacy education on SES related bias is outside of this scoping review, but moving forward, it would be prudent to consider how health literacy and assertiveness education with patients might help facilitated more active participation for patients with low SES, which may have a role in reducing health inequalities<sup>(34)</sup>.

Policies, guidelines, and best practice statements, which recognise the impact of SES on HP decision-making are needed to guide the HP when making decisions that inevitably include non-medical factors<sup>(36, 49, 54)</sup>. A smaller number of papers recommend that any such policies, guidelines, and best practice statements should be constructed with mindfulness of implicit bias<sup>(54, 103)</sup>. Implicit bias needs to be explicitly discussed and integrated into the policy and guidelines that help to shape HP interactions and patient experience. There is evidence of this work is happening to help support people of global majority heritage who are minoritised because they are categorised as non-white<sup>(104)</sup>. This work must be expanded to include SES related bias, given pervasive nature, as well as its complex interaction and intersection with race in relation to patient care.

### **Strengths and limitations**

This scoping review has its limitations which must be given consideration. Most included publications are from North America and Europe in the global north, therefore the relevance of its results to other parts of the world, especially those that are part of what is increasingly referred to as the global south is limited. The fact that only articles published in English were included, means that relevant works in other languages will have been omitted from this review. Consequently, the result of this scoping review provided a limited insight into other parts of the world, particularly those where English is not the native language, as well as in places where the organisation and delivery of healthcare takes place in systems that are distinct from those in North America and/or Europe. Conversely, the inclusion of research studies and other types of publications broadened the depth and breadth of this review. There was no critical appraisal or quality assessment of the included research studies, which is in keeping with JBI scoping review methodology<sup>(16) (17)</sup>, and was apt the focus was on mapping the literature on this topic. Drawing upon our diverse range of skills as patient and public interest representative (BA), a Librarian/Information Technologist (AC), and three HP academics (CJ, PG, RS), we reached a consensus on how best to convey the results to others in plain English, a series of recommendations for implementation in practice, as well as the priorities for future research.

## Implications for Practice and Policy

A key message arising from this scoping review for health services, professional bodies, and policy makers is that HP's have SES related implicit biases that influence how they organise and deliver patient care. HP decision-making is also subject to non-medical factors, as assumptions are often made about the care of people of low SES based on bias and stereotyping, which causes, or exacerbates health inequalities that can adversely affect patient's clinical outcomes<sup>(42)</sup>. It is important that we remain mindful that some people do not receive equitable care, so there is a responsibility for all HPs to do what they can to be better informed about their own practice in relation to equity, and to do what they can to address this issue. Heffernan<sup>(102)</sup> contends that people can find it unpalatable when they are confronted with evidence that challenges their firmly held big ideas, such as HPs who believe that they do no harm and always seek to do good, being informed that their implicit SES related biases may have deleterious impact on the quality, safety, and equity, of patient care. It is always tempting for people to elide over inconvenient truths or unpalatable facts because if they are accepted, then the individual is compelled to deal with things in a different way or to address gaps in their knowledge, attitude, skills, and behaviour, which is nearly always challenging. Turning a blind eye to biases can feel safe for an individual HP, but it is morally untenable as it contravenes the values that underpin healthcare and increasing the likelihood of people who are vulnerable, marginalised, silenced, and/or overlooked by wider society enduring unwarranted variations in care, receiving suboptimal care that is delivered in an iniquitous and unjust manner.

It is challenging for anyone to be truly objective and self-critical about their clinical practice, especially with regards to implicit bias which is tacit and often reflects normalised patterns of thinking and behaviour. In other words, everyone has a rationale or vocabulary of motive, for what they do or do not do, which means that it is challenging for anyone to accept that they have implicit biases, which are often contrary to the way a person thinks about themselves and their behaviour towards others. On the other hand, genuine changes in behaviour and improvement in any human endeavour can only arise when there is a genuine acceptance of truth of the situation, specifically facts and issues at hand, including any implicit biases, with a concomitant theory of action<sup>(105)</sup>. As challenging as this may be, it is important to bear in mind that a transformation programme of action, especially in terms of improvement, requires a willingness to confront and examine all possible truths by asking searching questions, in this case about the organisation and delivery of healthcare. This sentiment is summed up in the view that not 'knowing something' is understandable because we are human, provided that the person is not turning a blind eye because they 'don't want to know'<sup>(102)</sup>.

Health inequalities endure in part because of a lack of insight or willingness to address social injustice, social indifference, an ideological stance of a vacuum of leadership<sup>(101)</sup>. Given what this scoping review has surfaced about the potential impact of implicit SES related HP bias greater consideration is needed about how the results can inform efforts to reduce health inequalities. Healthcare commissioners, policy makers, educators, and regulatory bodies would do well to ensure that everyone involved on the organisation and delivery of healthcare, especially HPs know that implicit SES related bias increases the risk of the most vulnerable people in society.

## Conclusion

We included 67 papers which explored different aspects of SES related implicit bias of SES and HP- decision-making, but most publications were written by authors based in the USA. The amount of research on this topic has grown over time and has shifted more recently from the previous focus on doctors to other HPs, which reflects the increasingly plural approach to healthcare through interprofessional teamworking as well as the widening boundaries to scope of practice for non-medical professionals that has taken place. In addition, the focus of research has developed with the increasing use of vignette-based studies in this field. There has also been a rise in the use of Implicit Association Testing that was developed to detect subconsciously held HP biases in this field.

1 There is a gap in wider knowledge about the circumstances in which implicit bias is most likely to surface, but there  
2 is some evidence that this might be related to the HP's cognitive load, as time pressures can diminish self-awareness.  
3 Research that focuses on the differences in decision-making based on non-medical factors when the HP has limited  
4 time and high cognitive load, would help the health community to better understand this potential influence, which  
5 would in turn help when considering education and training aimed at perspective taking and self-awareness. It is  
6 important that real world solutions are considered with HPs that goes beyond education and training to identify safe  
7 guards in HP decision making that aim to ensure decisions are equitable and fair, as well as consideration of  
8 interventions aimed at improving patients' health literacy and assertiveness.  
9

10  
11  
12 This review has collected sizable evidence that HPs hold implicit bias of people with low SES, it is important therefore  
13 to consider mechanisms to reduce the impact of this bias on decision-making. HP decision-making is at times  
14 influenced by non-medical factors for people of low SES, and assumptions are made based on implicit bias and  
15 stereotyping, which compound or exacerbate health inequalities. A person's social position is linked to their power  
16 and for people of low SES a power imbalance between them and the HP often exists. Implicit bias comes to the fore  
17 prior to, during and after the dynamic interaction between the HP and the patient, which itself can reinforce or  
18 embed perceptions and judgemental attitudes that further impede due and proper mutual regard for other within  
19 this dyad, which militate against the delivery of safe, just, and equitable, healthcare.  
20  
21  
22

23 Greater awareness as well as acknowledgement of the pernicious nature and potential impact of HPs implicit SES  
24 related bias and it's sequelae on patient care on a macro, meso, and micro level is needed. Policy makers need to  
25 integrate raising awareness of this into policy and guidelines, remind health services and individual HPs that bias of  
26 SES can make vulnerable people more vulnerable and may adversely affect clinical outcomes.  
27

28 In sum, our review underscores the pressing imperative for research and theory development to underpin  
29 healthcare organisation, as well as HPs professional practice, education, professional developments, and regulation.  
30 We conclude by highlighting the most pressing unanswered research questions from our scoping review that need to  
31 be addressed , in the hope that this much needed work will be undertaken promptly. The three key research  
32 questions that must be prioritised in future work in this area are:  
33

- 34 **1.** Does cognitive load reduce self-awareness of SES implicit bias and impact on the decision-making of the HP?
- 35 **2.** What are the best conditions to support shared decision-making with people who have low SES?
- 36 **3.** What training do HPs need to raise their self-awareness of implicit SES related bias and reduce its impact on  
37 their decision-making?  
38  
39  
40  
41  
42  
43  
44  
45  
46  
47  
48  
49  
50  
51  
52  
53  
54  
55  
56  
57  
58  
59  
60

## Figure legend Caption

Figure 1: Prisma Flow Diagram

## Author Contributions

CJ, RS, PG, AC and BA discussed and refined ideas regarding the search strategy. AC developed the search strategy and conducted the database searches. CJ and RS extracted data and drafted the results. CJ is lead author and guarantor. CJ, RS and PG discussed and drafted the discussion of the paper with contribution from AC and BA.

## Funding Statement

There are no funders to report for this submission.

The lead author, CJ, was in receipt of a stipend from the Research Capacity Building Collaboration Wales (RCBC) First into Research (FiR) Fellowship scheme, to backfill her job on a part time basis, to lead this scoping review.

## Competing Interests

None of the people listed below declare any conflict of interest which may arise from being named as an author on this manuscript.

## Patient, Public Involvement Statement

This scoping review [and its previously published protocol] has been developed with a member of the public (BA). The design of this scoping review draws upon BA's personal experience of living with, and beyond a cancer diagnosis, which entails regular contact with health services and healthcare professionals. Therefore, BA's lived experience and perspective has directly shaped the design, results, discussion and implication sections of this work.

1  
2  
3 **Author Statements**

4 **Conflict of Interest Statement**

5  
6 None of the people listed below declare any conflict of interest which may arise from being named  
7  
8 as an author on this manuscript.  
9

10  
11  
12 **Claire Job**

13 <sup>1</sup>School of Healthcare Sciences, Cardiff University; Cardiff, United Kingdom: [jobc@cardiff.ac.uk](mailto:jobc@cardiff.ac.uk)  
14  
15

16  
17 **Bami Adenipekun**

18 <sup>2</sup>Patient and Public Involvement Representative

19 [badenipekun@gmail.com](mailto:badenipekun@gmail.com)  
20  
21

22  
23 **Anne Cleves**

24 <sup>3</sup>Velindre University NHS Trust Library, Cardiff University Information Services. Velindre Cancer Centre

25 Cardiff, United Kingdom

26 [lynchae1@cardiff.ac.uk](mailto:lynchae1@cardiff.ac.uk)  
27  
28  
29

30  
31 **Paul Gill**

32 <sup>4</sup>Department of Nursing, Midwifery and Health, Northumbria University, Newcastle, United Kingdom.

33 [Paul.gill@northumbria.ac.uk](mailto:Paul.gill@northumbria.ac.uk)  
34  
35  
36

37  
38 **Ray Samuriwo**

39 <sup>5</sup>School of Nursing and Healthcare Leadership, Faculty of Health Studies, University of Bradford; Bradford,

40 BD7 1DP, United Kingdom

41 [r.samuriwo@bradford.ac.uk](mailto:r.samuriwo@bradford.ac.uk)  
42  
43  
44  
45  
46  
47  
48  
49  
50  
51  
52  
53  
54  
55  
56  
57  
58  
59  
60

## References

1. **Marmot, M.** Fairer Society Healthy Lives: the Marmot Review. Strategy Review of Health Inequalities in England post-2010. Available: <https://www.gov.uk/research-for-development-outputs/fair-society-healthy-lives-the-marmot-review-strategic-review-of-health-inequalities-in-england-post-2010>
2. **Black, D.** Inequalities in Helath: The Black Report. London : Pengiun, 1980. <https://www.sochealth.co.uk/national-health-service/public-health-and-wellbeing/poverty-and-inequality/the-black-report-1980/the-origin-of-the-black-report/>
3. **Phelan JC, Link BG, Tehranifar P.** Social conditions as fundamental causes of health inequalities: theory, evidence, and policy implications. *J Health Soc Behav*, 2010. 51 Suppl:S28-40.  
[doi:10.1177/0022146510383498](https://doi.org/10.1177/0022146510383498) pmid:http://www.ncbi.nlm.nih.gov/pubmed/20943581
4. **Amato, K. R., M.-C. Arrieta, M. B. Azad, M. T. Bailey, J. L. Broussard, C. E.** The human gut microbiome and health inequalities. *Proceedings of the National Academy of Sciences*. 2021; 118, 25.
5. **Hastert, TA. Ruterbusch, JJ. Beresford, SAA.** Contribution of health behaviours to the association between area level socioeconomic status and cancer mortality. *s.l. : 2016, Social Science and Medicine*. 148: 52-58.
6. **Diex-Roux, AV.** Investigating Neighbourhood and area effects on health. *American Journal of Public Health*. 2001; 91, 11: 1783.
7. **Schwab, AP.** Putting cognitive psychology to work: Improving decision-making. *Social Science & Medicine*. 2008; 67: 1861–1869.
8. **Fasano, HT. McCarter, MSJ. Simonis, JM. Hoelscher, GL. Bullard, MJ.** Influence of Socioeconomic Bias on Emergency Medicine Resident Decision Making and Patient Care. *Sim Healthcare*.2021; 16: 85–91.
9. **Van Ryn, M. Burke, J.** The effect of patient race and socioeconomic status on physicians' perceptions of patients. *Soc Sci Med*. 2000; 50: pp813-828.
10. **Arpey, NC. Et al.** How Socioeconomic Status Affects Patient Perceptions of Health Care: A Qualitative Study. *Journal of Primary Care & Community Health*. 2017; 8, 3: 169–17
11. **Veesart, A. Barron, A.** Unconscious bias: Is it impacting your nursing care? *Nursing Made Incredibly Easy*. 2020: 47-49.
12. **Willems, S. et al.** Socio-economic status of the patient and doctor–patient communication: does it make a difference? *Patient Education and Counselling*. 2005; 56: 139–146.
13. **Job, C. Adenipekun, B., Cleves, A. Samuriwo, R.** Health professional's implicit bias of adult patients with low socioeconomic status (SES) and its effects on clinical decision-making: a scoping review protocol. *BMJ Open*. 2022; 12,
14. **Atkinson, A.B.** Multidimensional Deprivation: Contrasting Social Welfare and Counting Approaches. *The Journal of Economic Inequality*. 2003; 1: 51–65.
15. **Watson, V. Dibben, C. Cox, M. et al.** Testing the Expert Based Weights Used in the UK's Index of Multiple Deprivation (IMD) Against Three Preference-Based Methods. *Social Indicators Research*. 2019; 144, 3: 1055-1074.



- 1 16. **Peters, MDJ, Godfrey, CM, Khalil, H, McInerney, P, Parker, D, Bald-Soares, C.** Guidance for conducting  
2 systematic scoping reviews. Joanna Briggs Institute. [Online] 2015.  
3 <http://cfkr.dk/media/353553/Guidance%20for%20conducting%20systematic%20scoping%20reviews.pdf>.  
4
- 5 17. **Godfrey, C.** Exploring the world "out there": the use of scoping reviews in education research. 2020: 859-860.  
6
- 7 18. **Sarkis-Onofre, R., F. Catalá-López, E. Aromataris and C. Lockwood.** How to properly use the PRISMA Statement."  
8 Systematic Reviews. Systematic Reviews. 2021; 10, 1: 117.  
9
- 10 19. **Tricco, AC, Lillie, E, Zarin, W. et al.** Ann Intern Med. PRISMA Extension for Scoping Reviews (PRISMA-ScR):  
11 Checklist and Explanation. Ann Intern Med, 2018; 169: 467-473.  
12
- 13 20. **Briggs., Joanna.** Template source of Evidence details, Characteristics and results Extraction Instrument; 2020:  
14 Available at: JBI template source of evidence details, characteristics and results extraction instrument - JBI Manual  
15 for Evidence Synthesis. Available at:  
16 <https://wiki.jbi.global/display/MANUAL/Appendix+11.1+JBI+template+source+of+evidence+details%2C+characteristics+and+results+extraction+instrument>, 2020.  
17  
18  
19
- 20 21. **Feldmann J, Puhan MA, Mütsch M.** Characteristics of stakeholder involvement in systematic and rapid reviews: a  
21 methodological review in the area of health services research. BMJ open. 2019; 9, 8: :e024587  
22  
23
- 24 22. **Page, MJ, McKenzie JE, Bossuyt PM, Boutron I, Hoffmann TC, Mulrow CD, et al.** The PRISMA 2020 statement: an  
25 updated guideline for reporting systematic reviews. BMJ; 2021; 372:n71. doi: 10.1136/bmj.n71,  
26  
27
- 28 23. **Bradbury-Jones, C, Aveyard, H, Herberc, OR et al.** Scoping reviews: the PAGER framework for improving the  
29 quality of reporting. International Journal of Social Research Methodology. 2021: 1-14.  
30
- 31 24. **Crane, D.** Decisions to Treat Critically Ill Patients: A Comparison of Social Versus Medical Considerations. s.l. : The  
32 Milbank Memorial Fund Quarterly. Health and Society. 1975; 53, 1: 1-33.  
33
- 34 25. **McKinlay, JB, Potter, DA, Feldman, HA.** Non-Medical influences on medical decision making. Soc Sci Med. 1996;  
35 42, 5: 769-776.  
36  
37
- 38 26. **McKinlay, JB, Burns, RB, Durante, R, Feldman, HA et al.** Patient, physician and presentational influences on  
39 clinical decision making for breast cancer: results from a factorial experiment. Journal of Evaluation in Clinical  
40 Practice. 1997; 3, 1: 23-57.  
41  
42
- 43 27. **Feldman, HA, McKinlay, JB, Potter, DA, Freund, RB et al.** Nonmedical Influences on Medical Decision Making: An  
44 Experimental Technique using Videotapes, Factorial Design and Survey Sampling. Health Services Research. 1997,  
45 32, 3: 344-366.  
46  
47
- 48 28. **Krupat, E, Irish, JT, Kasten, LE. et al.** Patient Assertiveness and Physician decision making among older breast  
49 cancer patients. Social Science & Medicine. 1999; 49: 449-457.  
50
- 51 29. **Gordon, EJ, Sehgal, AR** Patient-Nephrologist Discussions about Kidney Transplantation as a Treatment Option.  
52 Advances in Renal Replacement Therapy. 2000; 7, 2: 177-183.  
53
- 54 30. **Mc Kinlay, JB, Freund, K, Moskowitz, M.** The Unexpected Influence of Physician Attributes on Clinical Decisions:  
55 Results of an Experiment. Journal of Health and Social Behavior. 2003; 43: 92-106.  
56  
57
- 58 31. **Tamayo-Saver, J, Dawson, NV, Hinze, SW. et al.** The effect of race/ethnicity and desired social characteristics on  
59 physicians' decisions to prescribe opioid analgesics. Acad Emerg Med. 2003; 10, 11: 1239-1248 .  
60

- 1  
2  
3  
4  
5  
6  
7  
8  
9  
10  
11  
12  
13  
14  
15  
16  
17  
18  
19  
20  
21  
22  
23  
24  
25  
26  
27  
28  
29  
30  
31  
32  
33  
34  
35  
36  
37  
38  
39  
40  
41  
42  
43  
44  
45  
46  
47  
48  
49  
50  
51  
52  
53  
54  
55  
56  
57  
58  
59  
60
32. **Manderbacka, K.** Exploring gender and socioeconomic differences in the treatment of coronary heart disease. *European Journal of Public Health*. 2005; 15, 6: 634–639.
33. **Arber, A. McKinlay, J. Adams, A. Marceau, L. Link, C. O'Donnell, AO.** Patient Characteristics and Inequalities in doctors' diagnostic and management strategies relating to CHD: A video-simulation experiment. *Social Science and Medicine*. 2006; 62: 103-115.
34. **Barnhart, JM. Cohen, O. Wright, N. et al.** Can Non-medical Factors Contribute to Disparities in Coronary Heart Disease Treatment? *Journal of Health Care for the Poor and Underserved*. 2006; 17, 3: pp559-574.
35. **Denburg, TD. Kim, FJ. Flanigan, RC. Fairclough, D et al.** The influence of patient race and social vulnerability on Urologist treatment recommendations in localised prostate cancer. *Med Care*. 2006; 44: 1137-1141.
36. **Bernheim, SM. Ross, JS. Krumboltz, HM, Bradley, EH.** Influence of patients' socioeconomic status on clinical management decisions: A Qualitative Study. *Annals of Family Medicine*. 2008; 6, 1: 53-59.
37. **Eggle, S. Albrecht, TL. Harper, WK.** Oncologists' recommendations of clinical trial participation to patients. Patient education and counseling. 2008; 70: 143-148.
38. **Nampiaparampil, DE. Nampiaparampil, JX. Harden, RN.** Pain and Prejudice. *Pain Management*. 2009; 10, 4: 716-721.
39. **Ceballo, R. Abbey, A. Schooler, D.** Perceptions of women's infertility: what do physicians see? *Fertility and Sterility*. 2010; 93, 4: 1066-1073.
40. **Gilbert, A. Benjamin, A. Abenhaim, HA.** Does education level influence the decision to undergo elective repeat caesarean section among women with previous caesarean section? *Journal of Gynaecological Can*. 2010; 32, 10: 942-947.
41. **Hajjaj, FM. Salek, MS. Basra, MKA. et al.** Nonclinical influences, beyond diagnosis and severity, on clinical decision making in dermatology: understanding the gap between guidelines and practice. *British Journal of Dermatology*. 2010; 163:789-799.
42. **McKinlay et al.** An additional cause of health care disparities: the variable clinical decisions of primary care disparities: the variable clinical decisions of primary care doctors. *Journal of Evaluation in Clinical Practice*. 2013; 19: 664–673.
43. **Shawahna, R. Rahman, N. Ahmad, M et al.** Prescribers' perspectives of the socioeconomic status and important indicators affecting prescribing behavior in a developing country *Cent. Eur. J. Med*. 2012; 7, 1: 129-136.
44. **Lay-Yee, R. Scott A. Davis, P.** Patterns of family doctor decision making in practice context. What are the implications for medical practice variation and social disparities? *Social Science and Medicine*. 2013; 76: 47-56.
45. **Haider, AH. Schneider, EB. Sriram, N. et al.** Unconscious race and class bias: Its association with decision making by trauma and acute care surgeons. *Journal Trauma Acute Care Surgery*. 2014; 77, 3: 409-416.
46. **Haider, AH. Schneider, EB. Siriam, N. et al.** Unconscious race and social class bias amongst acute care surgical clinicians and clinical treatment decisions. *JAMA Surgery*. 2015; 150, 5: 457-464.

- 1 47. **Williams, RL. Romney, C. Kano, M. et al.** Racial, Gender, and Socioeconomic Status Bias in Senior Medical  
2 Student Clinical Decision-Making: A National Survey. *J Gen Intern Med.* 2015; 30, 6:758–67 .
- 3 48. **Popescu, I. Schrag, D. Ang, A. Wong, M.** Racial/Ethnic and Socioeconomic Differences in Colorectal and Breast  
4 Cancer Treatment Quality. *Med Care.* 2016; 54, 8: 780-788.
- 5 49. **Gonzales, FA. Sangaramoorthy, M. Dwyer, LA. et al.** Patient-clinician interactions and disparities in breast cancer  
6 care: the equality in breast cancer care study. *Journal of Cancer Survivorship.* 2019; 13: 968–980.
- 7 50. **Hirsh, AT. Miller, MM. Hollingshead, NA. et al.** A randomized controlled trial testing a virtual perspective-taking  
8 intervention to reduce race and SES disparities in pain care. *Pain.* 2019; 160, 10: 2229–2240.
- 9 51. **Anastas, TM. Miller, MM. Hollingshead, NA. Stewart, JC. Rand, KL. Hirsh, AT.** The Unique and Interactive Effects  
10 of Patient Race, Patient Socioeconomic Status, and Provider Attitudes on Chronic Pain Care Decisions. *ann. behav.*  
11 *med.* 2020; 54: 771–782.
- 12 52. **Bynum, M.** Community Health Centres Primary Care Physicians Asthmas Management Perceptions of Uninsured  
13 Patients. *Professional Case Management.* 2020; 25, 6:335-342 .
- 14 53. **Khidir, H. McWilliams, M. O'Mailey, J. Zaborski, L et al.** Analysis of Consistency in Emergency Department  
15 Physician Variation in Propensity for Admission Across Patient Sociodemographic Groups. *JAMA.* 2021; 4, 9: 1-8 .
- 16 54. **Brown, KH.** Descriptive and normative ethics: Class, context and confidentiality for mothers with HIV. *Social*  
17 *Science Medicine,* 1993; 36, 3: 195-202.
- 18 55. **Smith-Oka, V.** Bodies of risk: Constructing motherhood in a Mexican public hospital. *Social Science & Medicine.*  
19 2012; 75: 2275-2282.
- 20 56. **Manzer, JL. Bell, AV.** “We’re a Little Biased”: Medicine and the Management. *Journal of Health and Social*  
21 *Behavior.* 2021; 6, 2: 120–135.
- 22 57. **Agerstrom, J. Carlsson, M. Bremer, A. et al.** Discriminatory cardiac arrest care? Patients with low socioeconomic  
23 status receive delayed cardiopulmonary resuscitation and are less likely to survive an in-hospital cardiac arrest.  
24 *European Heart Journal.* 2021; 42: 861-869 .
- 25 58. **Bernardes, SF. Tome-Pires, C. Brandao, T et al.** Classism in pain assessment and management: the mediating  
26 role of female patient dehumanization and perceived life hardship. *Pain.* 2021; 162, 12 : 2854-2864.
- 27 59. **Bruno, BA. Guirguis, K. Rofaiel, D et al.** Is Sociodemographic Status Associated with Empathic Communication  
28 and Decision Quality in Diabetes Care? *Journal of General Internal Medicine.* 2022; 37, 12: 3013-3019.
- 29 60. **Wilson, B.** Can patient lifestyle influence the management of pain? *Journal of Clinical Nursing.* 2008; 18: 399-408.
- 30 61. **Haider, AH. Schneider, EB. Sriram, N et al.** Unconscious race and class biases among registered nurses:  
31 Vignette-based study using implicit association testing. *Journal American College of Surgeons.* 2015; 20, 6: 1077-  
32 1086.
- 33 62. **Brandao, T. Campos, L. De Ruddere, L et al.** Classism in Pain Care: The Role of Patient Socioeconomic Status on  
34 Pain Medicine. 2019; 20, 11: 2094–2105.
- 35 63. **Diniz, D. Castro, P. Bousfield, A. et al.** Classism and dehumanization in chronic pain: A qualitative study of  
36 nurses’ inferences about women of different socio-economic status. *British Journal of Health Psychology.* 2020; 25:  
37 152-170.
- 38  
39  
40  
41  
42  
43  
44  
45  
46  
47  
48  
49  
50  
51  
52  
53  
54  
55  
56  
57  
58  
59  
60

- 1  
2  
3  
4  
5  
6  
7  
8  
9  
10  
11  
12  
13  
14  
15  
16  
17  
18  
19  
20  
21  
22  
23  
24  
25  
26  
27  
28  
29  
30  
31  
32  
33  
34  
35  
36  
37  
38  
39  
40  
41  
42  
43  
44  
45  
46  
47  
48  
49  
50  
51  
52  
53  
54  
55  
56  
57  
58  
59  
60
64. **MacCormick, R. E.** Decision making in cancer treatment: age and socio-economic status as independent variables. *Medical teacher*. 1990; 12, ¾: 353.
65. **Haider, AH, Sexton, J, Sriram, N. et al.** Association of Unconscious Race and Social Class Bias with Vignette-Based Clinical Assessment by Medical Students. *JAMA*. 2011; 306, 9: 942-951.
66. **Pettit, KE, Turner, JS, Kindrat, JK. et al.** Effect of Socioeconomic Status Bias on Medical Students-Patient Interactions Using an Emergency Medicine Simulation. *The Society for Emergency Medicine*. 2017; 1, 2: 126-131.
67. **Goddu, AP, O'Connor, K, Lanzkron, S. et al.** Do Words Matter? Stigmatizing Language and the Transmission of Bias in the Medical Record. *J Gen Intern Med*. 2018; 33, 5: 685–91.
68. **Dougall, JL, Schwartz, RC.** The influence of client socioeconomic status on psychotherapist's attributional biases and countertransference reactions. *American journal of psychotherapy*. 2011; 65,3: 249-265
69. **Vliestra, T, Woodger, N, Morison.** Lower' social class of a client evokes class self-awareness rather than discrimination in clinical reasoning: A video vignette study among British psychological and psychotherapeutic professionals working in the NHS. *Cancer Prevention Research*. 2020; 21: 335-347.
70. **Elholm Madsen, E, Morville, AL, Enemark Larsen, A, Hansen, T.** Is therapeutic judgement influenced by the patient's socio-economic status? A factorial vignette survey. *Scandinavian Journal of Occupational Therapy*. 2014; 23, 4: 245-252.
71. **Abuzour AS, Lewis PJ, Tully MP.** A qualitative study exploring how pharmacist and nurse independent prescribers make clinical decisions. *Journal of Advanced Nursing*. 2018; 74, 1: 65-74.
72. **Weiss MC.** The rise of non-medical prescribing and medical dominance. *Research in Social and Administrative Pharmacy*. 2021; 17, 3: 632-7.
73. **Mertens JF, Koster ES, Deneer VHM, Bouvy ML, van Gelder T.** Factors influencing pharmacists' clinical decision making in pharmacy practice. *Research in Social and Administrative Pharmacy*. 2023; 19, 9: 1267-77.
74. **Mills T, Patel N, Ryan K.** Pharmacist non-medical prescribing in primary care. A systematic review of views, opinions, and attitudes. *International Journal of Clinical Practice*. 2021; 75, 3: 13827.
75. **Dixon-Woods M, Aveling EL, Campbell A, et al.** What counts as a voiceable concern in decisions about speaking out in hospitals: A qualitative study. *Journal of Health Services Research & Policy*. 2022;27, 2:88-95.
76. **Martin GP, Aveling E-L, Campbell A, Tarrant C, Pronovost PJ, Mitchell I, et al.** Making soft intelligence hard: a multi-site qualitative study of challenges relating to voice about safety concerns. *BMJ Quality & Safety*. 2018; 27: 710-7.
77. **Martin GP, Dixon-Woods M.** Can we tell whether hospital care is safe? *British Journal of Hospital Medicine*. 2014; 75, 9: 484-5.
78. **Evans SC, Roberts MC, Keeley JW, Blossom JB, Amaro CM, Garcia AM, et al.** Vignette methodologies for studying clinicians' decision-making: Validity, utility, and application in ICD-11 field studies. *International Journal of Clinical and Health Psychology*. 2015; 15, 2: 160-70.
79. **Sheringham J, Kuhn I, Burt J.** The use of experimental vignette studies to identify drivers of variations in the delivery of health care: a scoping review. *BMC Medical Research Methodology*. 2021; 21, 1: 81.

- 1 80. **Chen N, Hsu CHC, L. Pearce P.** Developing Video Vignettes for Tourism Research: Protocol and Quality Indicators. *Journal of Travel Research*. 2022; 61, 8: 1828-47.
- 2
- 3
- 4 81. **Cheng AW, Chang J, O'Brien J, Budgazad MS, Tsai J.** Model Minority Stereotype: Influence on Perceived Mental Health Needs of Asian Americans. *Journal of Immigrant and Minority Health*. 2017; 19, 3: 572-81.
- 5
- 6
- 7 82. **Kunesh CE, Noltemeyer A.** Understanding Disciplinary Disproportionality: Stereotypes Shape Pre-Service Teachers' Beliefs About Black Boys' Behavior. *Urban Education*. 2019; 54, 4: 471-98.
- 8
- 9
- 10 83. **Eckerd S, DuHadway S, Bendoly E, Carter CR, Kaufmann L.** On making experimental design choices: Discussions on the use and challenges of demand effects, incentives, deception, samples, and vignettes. *Journal of Operations Management*. 2021; 67, 2: 261-75.
- 11
- 12
- 13
- 14
- 15 84. **Matza LS, Stewart KD, Lloyd AJ, Rowen D, Brazier JE.** Vignette-Based Utilities: Usefulness, Limitations, and Methodological Recommendations. *Value in Health*. 2021; 24, 6: 812-21.
- 16
- 17
- 18
- 19 85. **Blodgett AT, Schinke RJ, Smith B, Peltier D, Pheasant C.** In Indigenous Words: Exploring Vignettes as a Narrative Strategy for Presenting the Research Voices of Aboriginal Community Members. *Qualitative Inquiry*. 2011; 17, 6: 522-33.
- 20
- 21
- 22
- 23 86. **Dovidio, JF, Fiske, ST.** Under the Radar: How Unexamined Biases in Decision Making Processes in Clinical Interactions Can Contribute to Health Care Disparities. *American Journal of Public Health*. 2012; 102, 5: 945-949.
- 24
- 25
- 26 87. **Susan T. Fiske** Stereotype Content: Warmth and Competence Endure Current Directions in Psychological Science 2018; 27, 2: 67-73.
- 27
- 28
- 29
- 30 88. **Fiske, ST.** Intergroup biases: a focus on stereotype content, *Current Opinion in Behavioral Sciences*. 2015; 3: 45-50.
- 31
- 32
- 33
- 34 89. **Durante F, Fiske ST.** How social-class stereotypes maintain inequality. *Curr Opin Psychol*. 2017 Dec; 18: 43-48.
- 35
- 36 90. **Jenkins, AC, Karashchuk, P, Zhu, L, et al.** Predicting human behavior towards members of different social groups. *PNAS*. 2018; 115, 39: 9696-9701.
- 37
- 38
- 39 91. **Chase, D, Salani, R, Farley, J et al.** Unwittingly biased: A note to gynecologic cancer providers. *Gynecologic Oncology*. 2021; 160, 3: 646-648.
- 40
- 41
- 42 92. **Crandlemire, LA.** Unconscious Bias and the Impacts on caring: The Role of the Clinical Nursing Instructor. *International Journal for Human Caring*. 2020; 24, 2: 84-91.
- 43
- 44
- 45 93. **Burgess, JD.** Are Providers More Likely to Contribute to Healthcare Disparities Under Higher Levels of Cognitive Load? How features of the Healthcare Setting May Lead to Biases in Medical Decision Making. *Medical Decision Making*. 2010; 30: 246-257.
- 46
- 47
- 48
- 49
- 50 94. **Kirkham, M, Stapleton, H, Curtis, P, et al.** Stereotyping as a professional defence mechanism. *British Journal of Midwifery*. 2002; 10, 9: 549-552.
- 51
- 52
- 53 95. **Gopaldas, Ahir.** "Intersectionality 101." *Journal of Public Policy & Marketing*, vol. 32, 2013, pp. 90-94. JSTOR, <http://www.jstor.org/stable/43305317>. Accessed 15 Oct. 2023.
- 54
- 55
- 56
- 57 96. **Fitxgerald, C, Hurst, S.** Implicit bias in healthcare professionals: a systematic review. *BMC Medical Ethics*. 2017; 18, 19: 1-18.
- 58
- 59
- 60

- 1  
2  
3  
4  
5  
6  
7  
8  
9  
10  
11  
12  
13  
14  
15  
16  
17  
18  
19  
20  
21  
22  
23  
24  
25  
26  
27  
28  
29  
30  
31  
32  
33  
34  
35  
36  
37  
38  
39  
40  
41  
42  
43  
44  
45  
46  
47  
48  
49  
50  
51  
52  
53  
54  
55  
56  
57  
58  
59  
60
97. **Murphy, KA. Ellison-Barnes, A. Johnson, EN. et al.** The Clinical Examination and Socially At-Risk Populations. *Med Clin N Am.* 2018; 102: 521-532.
98. **Gopal, DP. Chetty, U. O'Donnell, P. et al.** Implicit bias in healthcare: clinical practice, research and decision making. *Future Healthcare Journal.* 2021; 8, 1: 40-48.
99. **Durante F, Capozza D, Fiske ST.** The Stereotype Content Model: The Role Played by Competence in Inferring Group Status. *TPM Test Psychom Methodol Appl Psychol.* 2010; 17(4): 187-199.
100. **Castaneda-Guarderas, A. Glassberg, J. Grudzen, CR. et al.** Shared Decision Making With Vulnerable Populations in the Emergency Department. *Academic Emergency Medicine.* 2016; 23, 12: 1410-1416.
101. **Hassan, S. M., L. Melville-Richards, A. Ring, J. Cloke, S. Smith, P et al.** "Minding the gap: The importance of active facilitation in moving boundary objects from in-theory to in-use as a tool for knowledge mobilisation. *SMM- Qualitative Research in Health.*2023; 3.100235.
102. **Heffernan, M.** *Wilful Blindness.* 2019 and London., Simon and Schuster Uk Ltd.
103. **Hemley, E. Peters, K.** 10 Steps for avoiding health disparities in your practice. *The Journal of Family Practice.* 2004; 53, 3: 193-196.
104. **Government, Welsh.** Anti-Racist Wales Action Plan. 2022. Available at : [Anti-racist Wales Action Plan | GOV.WALES](#)
105. **Samuriwo, R.** "Interprofessional Collaboration—Time for a New Theory of Action? *Frontiers in Medicine.* 2022; <https://www.frontiersin.org/articles/10.3389/fmed.2022.876715/full>, 9.
106. **Hofmeister, S. Soprych, A.** Teaching resident physicians the power of implicit bias and how it impacts patient care utilizing patients who have experienced incarceration as a model. *The International Journal of Psychiatry in Medicine,* 2017; 52, 4–5–6: 345–354.
107. **Detsky, AS. Baerlocher, MO.** Do Nice Patients Recieve Better Care? *Journal American Medical Association.* 2011; 306, 1: 94-95.

# Health Professionals implicit bias of patients with low socioeconomic status (SES) and its effects on clinical decision-making: A Systematic Scoping Review

## Tables

Table 1: Table of Databases searched.

|                                                                                                                         |                                           |
|-------------------------------------------------------------------------------------------------------------------------|-------------------------------------------|
| <b>Date Restriction:</b> None                                                                                           | <b>Language Restriction:</b> English only |
| *The start date varies in each of the databases because these are the first available offered by each of the databases. |                                           |
| <b>Database name</b>                                                                                                    | <b>Dates Covered* Up to March 9 2023</b>  |
| Medline (OVID) & Epub & Medline in process (OVID)                                                                       | 1947 – present                            |
| <i>Embase (OVID)</i>                                                                                                    | 1946 – present                            |
| <i>ASSIA (ProQuest)</i>                                                                                                 | inception – present                       |
| <i>Scopus (Elsevier)</i>                                                                                                | 1960 – present                            |
| <i>CINAHL (EBSCO)</i>                                                                                                   | 1976 – present                            |

Table 2: Identification the Population Concept and Context

| Population                                                                                                     | Concept                                                                                                                                                                                                                                                                                                                  | Context                                                                                                                                                                                                    |
|----------------------------------------------------------------------------------------------------------------|--------------------------------------------------------------------------------------------------------------------------------------------------------------------------------------------------------------------------------------------------------------------------------------------------------------------------|------------------------------------------------------------------------------------------------------------------------------------------------------------------------------------------------------------|
| ❖ People aged 18+ globally.                                                                                    | ❖ SES<br>❖ Papers that discuss a Contributing factor of SES (such as education or income) as defined in the operational definitions.<br><br>Please see the search strategy detailed in the supplementary material attached.                                                                                              | ❖ Health Professional (HP) implicit bias or unconscious bias and interactions with decision-making.<br>❖ A Health Professional's (HP's) 'attitude' that connects Socioeconomic Status and decision-making. |
| Design                                                                                                         | Setting                                                                                                                                                                                                                                                                                                                  |                                                                                                                                                                                                            |
| ❖ Studies of all designs that include primary data including case studies.<br>❖ Editorials<br>❖ Opinion papers | ❖ Any healthcare setting where a person is assessed and/or care planned by a health professional (HP) including: <ul style="list-style-type: none"> <li>• Doctors and nurses</li> <li>• Physiotherapist and Occupational Therapists</li> <li>• Speech and Language Therapists</li> <li>• Pre-natal midwifery.</li> </ul> |                                                                                                                                                                                                            |

Table 3: Link between SES and HP decision-making per professional group (research papers)

| Professional Group      | Link found | No link found | link found | Grand Total |
|-------------------------|------------|---------------|------------|-------------|
| Doctor                  | n=23       | n=8           | 74%        | n=31        |
| Medical student         | n=3        | n=1           | 75%        | n=4         |
| Multi-professional      | n=3        | n=3           | 50%        | n=6         |
| Nurse                   | n=3        | n=1           | 75%        | n=4         |
| Occupational Therapist  | n=0        | n=1           | 0%         | n=1         |
| Psychological Therapist | n=1        | n=1           | 50%        | n=2         |
| Grand Total             | n=33       | n=15          | 69%        | n=48        |

Table 4: Link between SES and HP decision-making per specialty (research papers)

| Condition                | Link Found | No Link found | Link Found | Total |
|--------------------------|------------|---------------|------------|-------|
| Cancer Care              | n=6        | n=2           | 78%        | n=8   |
| Multiple Conditions      | n=3        | n=6           | 38%        | n=9   |
| Coronary Heart Disease   | n=7        | n=1           | 86%        | n=8   |
| Pain Assess/Management   | n=7        | n=0           | 100%       | n=7   |
| Obstetrics/Contraception | n=3        | n=2           | 60%        | n=5   |
| Diabetes                 | n=1        | n=1           | 50%        | n=2   |
| Mental Health            | n=1        | n=1           | 50%        | n=2   |
| Trauma                   | n=0        | n=2           | 0%         | n=2   |
| Asthma                   | n=1        | n=0           | 100%       | n=1   |
| Dermatology              | n=1        | n=0           | 100%       | n=1   |
| Kidney Transplantation   | n=1        | n=0           | 100%       | n=1   |
| Palliative Care          | n=1        | n=0           | 100%       | n=1   |
| Sickle Cell Disease      | n=1        | n=0           | 100%       | n=1   |
| Total                    | 33         | 15            | -          | 48    |



# Health Professionals implicit bias of patients with low socioeconomic status (SES) and its effects on clinical decision-making: A Systematic Scoping Review

figures and Illustrations

Figure 1: Prisma Flow Diagram

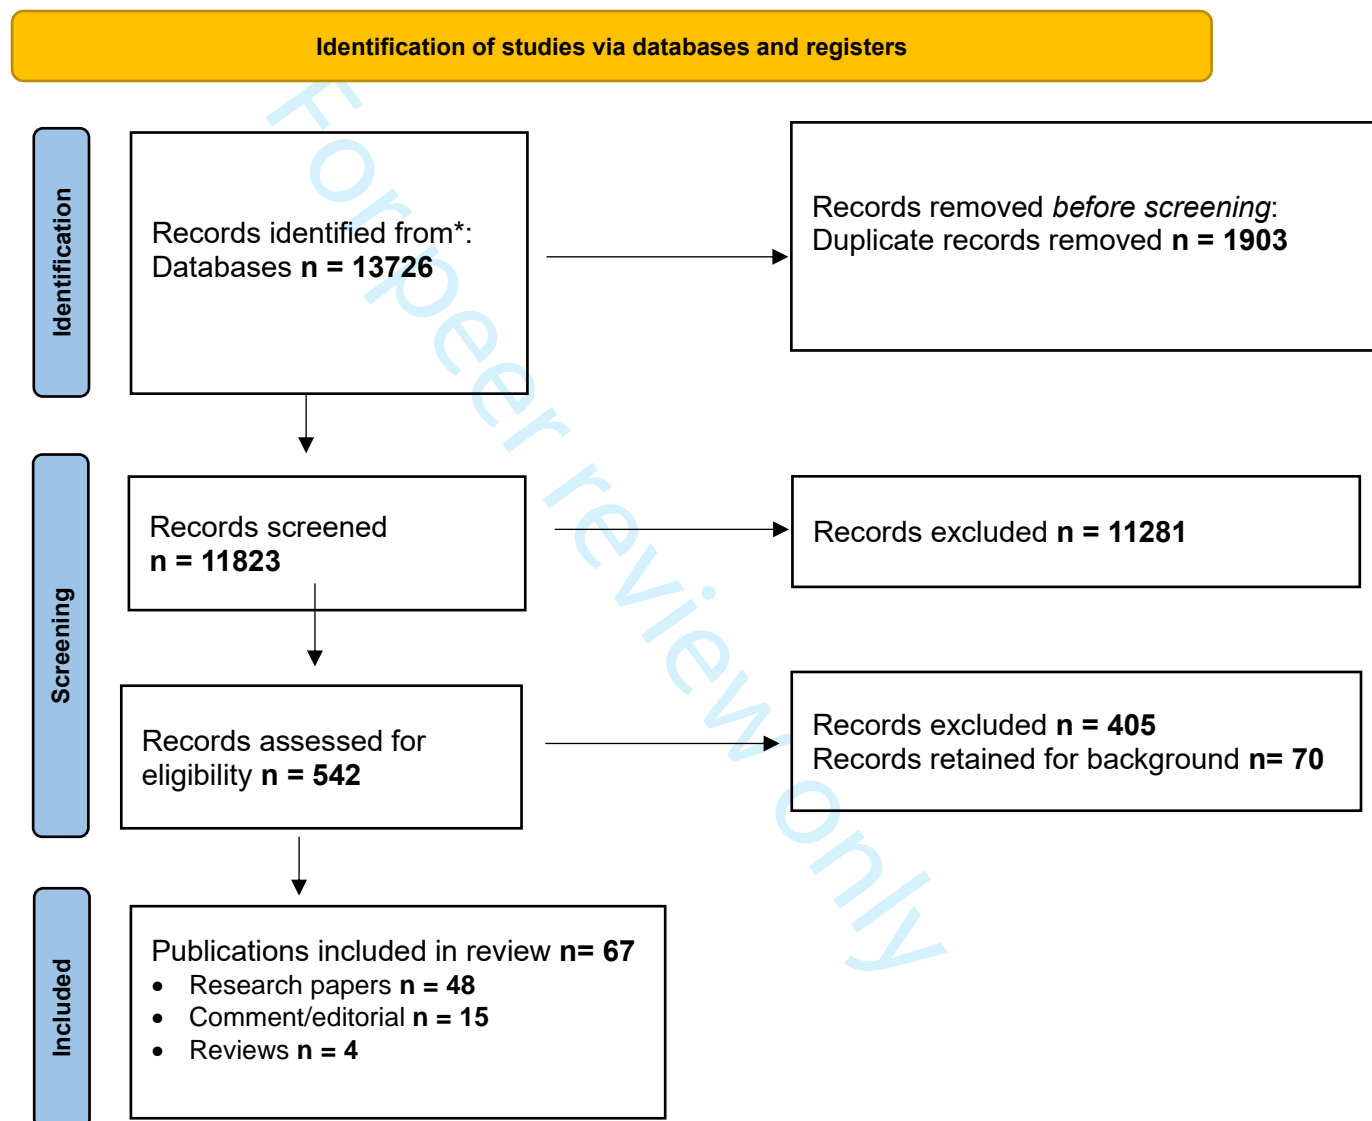

## Health Professionals implicit bias of patients with low socioeconomic status (SES) and its effects on clinical decision-making: A Systematic Scoping Review

### Supplementary Material – operational definitions

#### Box 1: Key terms and their operational definitions in this scoping review

| Key term                    | Operational Definition                                                                                                                                                                                                                                                                                                                                                                            |
|-----------------------------|---------------------------------------------------------------------------------------------------------------------------------------------------------------------------------------------------------------------------------------------------------------------------------------------------------------------------------------------------------------------------------------------------|
| Health Professional (HP)    | Any registered healthcare professional including Doctors, Surgeons, Nurses, Midwives, or Allied Healthcare Professionals.                                                                                                                                                                                                                                                                         |
| Clinical Decision-making    | A judgement or decision that influences any aspects of care organised or delivered by the HP such as choices made about the diagnostic tests, and referrals seeking specialist input. It also includes decisions about specific treatments such as surgical procedures, therapies, or medications, as well as ceasing or withdrawing active treatment.                                            |
| Socio Economic Status (SES) | Any single discrete measure of SES as set out in the Multiple Indices of Deprivation or the Multidimensions of Deprivation, including factors such as income, education, physical environment or neighbourhood quality, and health <sup>(14-15)</sup> . Any discrete measures that can be used as a proxy for the SES of a patient in HP decision-making such as income, unemployment, education. |

## **Supplementary Material – Search Strategies**

### **Medline ALL (OVIDSP): 1946 to present**

1. Socioeconomic Factors/
2. employment/
3. unemployment/
4. Economic Status/
5. Educational Status/
6. Medical Indigency/
7. exp Social Class/
8. exp Health Status Disparities/
9. exp Healthcare Disparities/
10. exp Poverty/
11. exp poverty areas/
12. ((social or socio economic or socioeconomic or economic or income) adj4 (deprivat\* or advantage\* or disadvantage\* or disparit\* or status or class or position or hierach\* or determinant\* or inequalit\* or inequit\* or barrier\* or circumstance\*)).tw.
13. ((education\* or employment) adj2 (status or level)).tw.
14. (sociodemographic or socio demographic or income or wealth or poverty or affluen\*).tw.
15. SES.tw.
16. 1 or 2 or 3 or 4 or 5 or 6 or 7 or 8 or 9 or 10 or 12 or 13 or 14 or 15
17. exp Clinical Decision-Making/
18. exp Decision Making/
19. Patient Care Management/
20. exp disease management/
21. ((Clinical or medical or health or treatment\*) adj2 (decision\* or decid\* or option\* or choice\*)).tw.
22. (treatment\* adj2 (select\* or recommend\* or receipt)).tw.
23. 17 or 18 or 19 or 20 or 21 or 22

- 1
- 2 24. exp Prejudice/
- 3
- 4 25. exp "Attitude of Health Personnel"/
- 5
- 6 26. exp Professional-Patient Relations/
- 7
- 8 27. exp Unconscious, Psychology/
- 9
- 10 28. "unconscious bias\*".tw.
- 11
- 12 29. ((Implicit or explicit) adj3 (cognition or bias\*)).tw.
- 13
- 14 30. prejudice.tw.
- 15
- 16 31. stereotyp\*.tw.
- 17
- 18 32. Classism.tw.
- 19
- 20 33. (treatment\* adj2 (unequal or differential)).tw.
- 21
- 22 34. (("Health professional\*" or nurse\* or doctor\* or clinician\* or physician\* or
- 23 registrar\* or intern\* or SHO\* or surgeon\* or student\* or AHP\* or allied or physio\* or
- 24 speech or occupational or Dietitian\* or therapist\* or radiographer\* or midwi\* or
- 25 "General Practitioner\*" or GP\*) adj3 (attitude or judg\* or bias)).tw.
- 26
- 27 35. exp Health Personnel/
- 28
- 29 36. exp Students, health occupations/
- 30
- 31 37. 35 or 36
- 32
- 33 38. exp Psychology, social/
- 34
- 35 39. exp Mental Processes/
- 36
- 37 40. 38 or 39
- 38
- 39 41. 37 and 40
- 40
- 41 42. 24 or 25 or 26 or 27 or 28 or 29 or 30 or 31 or 32 or 33 or 34 or 41
- 42
- 43 43. 16 and 23 and 42
- 44
- 45
- 46
- 47
- 48
- 49
- 50
- 51
- 52

### EMBASE (OVIDSP): 1947 to present

- 53
- 54
- 55 1. socioeconomic/
- 56
- 57 2. economic status/
- 58
- 59 3. income group/
- 60

- 1
- 2
- 3
4. poverty/
5. exp employment status/
6. exp educational status/
7. exp social status/
8. exp health care disparity/
9. exp health disparity/
10. ((social or socio economic or socioeconomic or economic or income) adj4 (deprivat\* or advantage\* or disadvantage\* or disparit\* or status or class or position or hierach\* or determinant\* or inequalit\* or inequit\* or barrier\* or circumstance\*).tw.
11. ((education\* or employment) adj2 (status or level)).tw.
12. (sociodemographic or socio demographic or income or wealth or poverty or affluen\*).tw.
13. SES.tw.
14. 1 or 2 or 3 or 4 or 5 or 6 or 7 or 8 or 9 or 10 or 11 or 12 or 13
15. exp clinical decision making/
16. exp medical decision making/
17. exp decision making/
18. patient care/
19. disease management/
20. ((Clinical or medical or health or treatment\*) adj2 (decision\* or decid\* or option\* or choice\*).tw.
21. (treatment\* adj2 (select\* or recommend\* or receipt)).tw.
22. 15 or 16 or 17 or 18 or 19 or 20 or 21
23. exp prejudice/
24. exp cognitive bias/
25. exp health personnel attitude/
26. exp professional-patient relationship/
27. exp ego development/
28. exp stereotypy/
29. prejudice.tw.

- 1
- 2 30. stereotyp\*.tw.
- 3
- 4 31. Classism.tw.
- 5
- 6 32. (treatment\* adj2 (unequal or differential)).tw.
- 7
- 8 33. (("Health professional\*" or nurse\* or doctor\* or clinician\* or physician\* or
- 9 registrar\* or intern\* or SHO\* or surgeon\* or student\* or AHP\* or allied or physio\* or
- 10 speech or occupational or Dietitian\* or therapist\* or radiographer\* or midwi\* or
- 11 "general practitioner\*" or GP\*) adj2 (attitude or judg\* or bias)).tw.
- 12
- 13
- 14 34. exp health care personnel/
- 15
- 16 35. exp health student/
- 17
- 18 36. 34 or 35
- 19
- 20 37. exp social psychology/
- 21
- 22 38. cognition/
- 23
- 24 39. mental function/
- 25
- 26 40. 37 or 38 or 39
- 27
- 28 41. 36 and 40
- 29
- 30 42. 23 or 24 or 25 or 26 or 27 or 28 or 29 or 30 or 31 or 32 or 33 or 41
- 31
- 32 43. 14 and 22 and 42
- 33
- 34 44. limit 43 to english language
- 35
- 36
- 37
- 38
- 39
- 40
- 41
- 42
- 43
- 44
- 45
- 46
- 47
- 48
- 49
- 50
- 51
- 52
- 53
- 54
- 55
- 56
- 57
- 58
- 59
- 60

### ASSIA (Proquest): 1987 to present

((MAINSUBJECT.EXACT.EXPLODE("Socioeconomic factors") OR  
 MAINSUBJECT.EXACT.EXPLODE("Socioeconomic indicators") OR  
 MAINSUBJECT.EXACT.EXPLODE("Socioeconomic conditions") OR  
 MAINSUBJECT.EXACT("Employment") OR  
 MAINSUBJECT.EXACT("Unemployment") OR MAINSUBJECT.EXACT("Poverty")  
 OR MAINSUBJECT.EXACT.EXPLODE("Low income people") OR ab((social  
 NEAR/4 (deprivat\* OR advantage\* OR disadvantage\* OR disparit\* OR status OR  
 class OR position OR hierach\* OR determinant\* OR inequalit\* OR inequit\* OR  
 barrier\* OR circumstance\*))) OR ab((socio economic NEAR/4 (deprivat\* OR  
 advantage\* OR disadvantage\* OR disparit\* OR status OR class OR position OR  
 hierach\* OR determinant\* OR inequalit\* OR inequit\* OR barrier\* OR  
 circumstance\*))) OR ab((socioeconomic NEAR/4 (deprivat\* OR advantage\* OR  
 disadvantage\* OR disparit\* OR status OR class OR position OR hierach\* OR



1 registrar\* OR intern\* OR sho\* OR surgeon\* OR student\* OR ahp\* OR allied  
 2 OR physio\* OR speech OR occupational OR dietitian\* OR therapist\* OR  
 3 radiographer\* OR midwi\* ) W/2 attitude\* ) ) OR ( TITLE-ABS-KEY ( ( "Health  
 4 professional" \* OR nurse\* OR doctor\* OR clinician\* OR physician\* OR  
 5 registrar\* OR intern\* OR sho\* OR surgeon\* OR student\* OR ahp\* OR allied  
 6 OR physio\* OR speech OR occupational OR dietitian\* OR therapist\* OR  
 7 radiographer\* OR midwi\* ) W/2 bias\* ) ) OR ( TITLE-ABS-KEY ( treatment\* W/2  
 8 ( unequal OR differential ) ) ) OR ( TITLE-ABS-KEY ( ( "Health professional" \*  
 9 OR nurse\* OR doctor\* OR clinician\* OR physician\* OR registrar\* OR intern\*  
 10 OR sho\* OR surgeon\* OR student\* OR ahp\* OR allied OR physio\* OR  
 11 speech OR occupational OR dietitian\* OR therapist\* OR radiographer\* OR  
 12 midwi\* OR "general practitioner\*" OR GP\* ) W/2 judg\* ) ) )

### CINAHL (EBSCO): 1976 to present

23 S52 S16 AND S24 AND S50 Narrow by Language: - english  
 24  
 25 S51 S16 AND S24 AND S50  
 26  
 27 S50 S25 OR S26 OR S27 OR S28 OR S29 OR S30 OR S31 OR S32 OR S33 OR  
 28 S34 OR S35 OR S36 OR S37 OR S38 OR S39 OR S40 OR S41 OR S42 OR S49  
 29  
 30 S49 S45 AND S48  
 31  
 32 S48 S46 OR S47  
 33  
 34 S47 (MH "Mental Processes+")  
 35  
 36 S46 (MH "Psychology, Social+")  
 37  
 38 S45 S43 OR S44  
 39  
 40 S44 (MH "Students, Health Occupations+")  
 41  
 42 S43 (MH "Health Personnel+")  
 43  
 44 S42 AB (("Health professional\*" or nurse\* or doctor\* or clinician\* or physician\* or  
 45 registrar\* or intern\* or SHO\* or surgeon\* or student\* or AHP\* or allied or physio\* or  
 46 speech or occupational or Dietitian\* or therapist\* or radiographer\* or midwi\*) N2  
 47 (attitude or judg\* or bias\*)  
 48  
 49 S41 TI (("Health professional\*" or nurse\* or doctor\* or clinician\* or physician\* or  
 50 registrar\* or intern\* or SHO\* or surgeon\* or student\* or AHP\* or allied or physio\* or  
 51 speech or occupational or Dietitian\* or therapist\* or radiographer\* or midwi\* or  
 52 "general practitioner\*" or GP\*) N2 (attitude or judg\* or bias\*)  
 53  
 54 S40 AB (treatment\* N2 (unequal or differential))  
 55  
 56 S39 TI (treatment\* N2 (unequal or differential))  
 57  
 58  
 59  
 60



- 1  
2 S38 AB Classism  
3  
4 S37 TI Classism  
5  
6 S36 AB stereotyp\*  
7  
8 S35 TI stereotyp\*  
9  
10 S34 AB prejudice  
11  
12 S33 TI prejudice  
13  
14 S32 AB ((Implicit or explicit) N3 (cognition or bias\*))  
15  
16 S31 TI ((Implicit or explicit) N3 (cognition or bias\*))  
17  
18 S30 AB "unconscious bias\*" 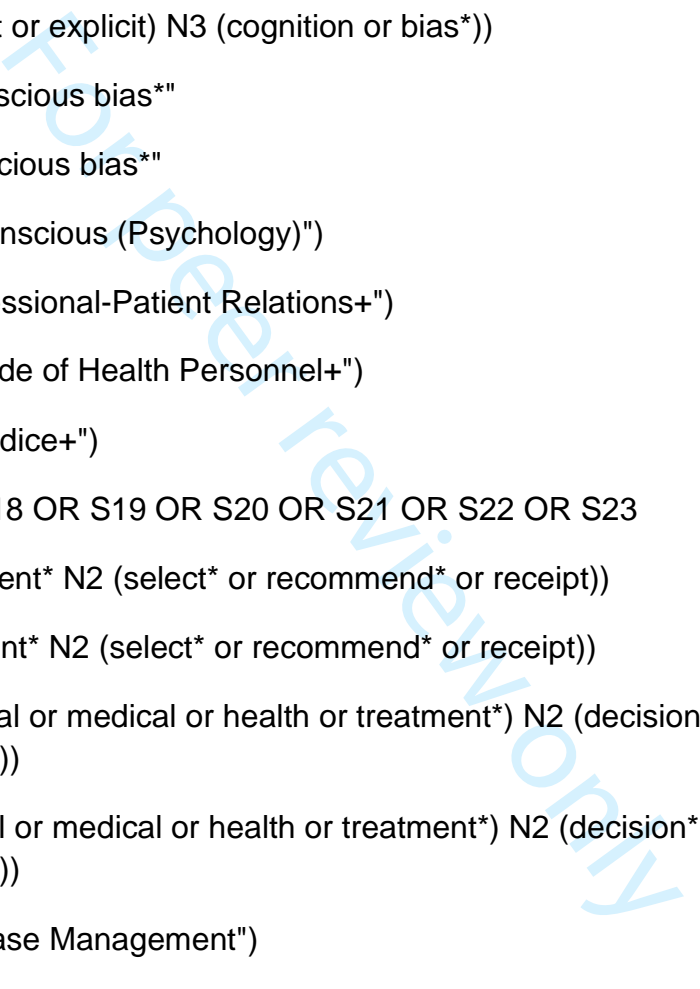  
19  
20 S29 TI "unconscious bias\*"   
21  
22 S28 (MH "Unconscious (Psychology)")   
23  
24 S27 (MH "Professional-Patient Relations+")   
25  
26 S26 (MH "Attitude of Health Personnel+")   
27  
28 S25 (MH "Prejudice+")   
29  
30 S24 S17 OR S18 OR S19 OR S20 OR S21 OR S22 OR S23  
31  
32 S23 AB (treatment\* N2 (select\* or recommend\* or receipt))   
33  
34 S22 TI (treatment\* N2 (select\* or recommend\* or receipt))   
35  
36 S21 AB ((Clinical or medical or health or treatment\*) N2 (decision\* or decid\* or  
37 option\* or choice\*))   
38  
39 S20 TI ((Clinical or medical or health or treatment\*) N2 (decision\* or decid\* or  
40 option\* or choice\*))   
41  
42 S19 (MH "Disease Management")   
43  
44 S18 (MH "Decision Making+")   
45  
46 S17 (MH "Decision Making, Clinical+")   
47  
48 S16 S1 OR S2 OR S3 OR S4 OR S5 OR S6 OR S7 OR S8 OR S9 OR S10 OR  
49 S11 OR S12 OR S13 OR S14 OR S15  
50  
51 S15 AB SES  
52  
53 S14 TI SES  
54  
55 S13 AB (sociodemographic or socio demographic or income or wealth or poverty  
56 or affluen\*)  
57  
58  
59  
60

1  
2 S12 TI (sociodemographic or socio demographic or income or wealth or poverty or  
3 affluen\*)  
4

5 S11 AB ((social or socio economic or socioeconomic or economic or income) N4  
6 (deprivat\* or advantage\* or disadvantage\* or disparit\* or status or class or position or  
7 hierach\* or determinant\* or inequalit\* or inequit\* or barrier\* or circumstance\*))  
8  
9

10 S10 TI ((social or socio economic or socioeconomic or economic or income) N4  
11 (deprivat\* or advantage\* or disadvantage\* or disparit\* or status or class or position or  
12 hierach\* or determinant\* or inequalit\* or inequit\* or barrier\* or circumstance\*))  
13  
14

15 S9 (MH "Economic Status")  
16

17 S8 (MH "Poverty Areas")  
18

19 S7 (MH "Poverty+")  
20

21 S6 (MH "Healthcare Disparities")  
22

23 S5 (MH "Health Status Disparities")  
24

25 S4 (MH "Social Class+")  
26

27 S3 (MH "Unemployment")  
28

29 S2 (MH "Employment+")  
30

31 S1 (MH "Socioeconomic Factors+")  
32  
33  
34  
35  
36  
37  
38  
39  
40  
41  
42  
43  
44  
45  
46  
47  
48  
49  
50  
51  
52  
53  
54  
55  
56  
57  
58  
59  
60

## Supplementary Material 2. Scoping Review Data Extraction Tool

Adapted from the JBI Scoping Review Data Extraction tool<sup>20</sup>

| Scoping Review Details                                                               |                                                                                                                                                                                                                                                                                                                                                                                                          |
|--------------------------------------------------------------------------------------|----------------------------------------------------------------------------------------------------------------------------------------------------------------------------------------------------------------------------------------------------------------------------------------------------------------------------------------------------------------------------------------------------------|
| <b>Scoping Review title:</b>                                                         | Health Professionals implicit bias of patients with low socioeconomic status (SES) and its effects on clinical decision-making: A Systematic Scoping Review                                                                                                                                                                                                                                              |
| <b>Review objective/s:</b>                                                           | To scope the reported impact of HP bias about SES on clinical decision making and its effect on the care for people with lower SES in wider literature                                                                                                                                                                                                                                                   |
| <b>Review question/s:</b>                                                            | <ul style="list-style-type: none"> <li>• RQ1: What has been published about implicit SES bias and HP attitudes or behaviours when deciding/providing care.</li> <li>• RQ2: How does SES effect the dynamics of the HP and patient relationship?</li> <li>• RQ3: What recommendations for practice have been postulated, implemented, or evaluated to address HP implicit bias related to SES.</li> </ul> |
| Inclusion/Exclusion Criteria                                                         |                                                                                                                                                                                                                                                                                                                                                                                                          |
| <b>Population:</b> Adults                                                            |                                                                                                                                                                                                                                                                                                                                                                                                          |
| <b>Concept:</b> SES                                                                  |                                                                                                                                                                                                                                                                                                                                                                                                          |
| <b>Context:</b> HP decision making                                                   |                                                                                                                                                                                                                                                                                                                                                                                                          |
| <b>Types of publication or evidence source</b>                                       |                                                                                                                                                                                                                                                                                                                                                                                                          |
| Evidence source Details and Characteristics                                          |                                                                                                                                                                                                                                                                                                                                                                                                          |
| <b>Citation details (e.g., author/s, date, title, journal, volume, issue, pages)</b> |                                                                                                                                                                                                                                                                                                                                                                                                          |
| <b>Country</b>                                                                       |                                                                                                                                                                                                                                                                                                                                                                                                          |
| <b>Context – professional group</b>                                                  |                                                                                                                                                                                                                                                                                                                                                                                                          |
| <b>Disease group (if applicable)</b>                                                 |                                                                                                                                                                                                                                                                                                                                                                                                          |
| <b>Participants (details e.g., age/sex and number)</b>                               |                                                                                                                                                                                                                                                                                                                                                                                                          |
| <b>SES Terminology used.</b>                                                         |                                                                                                                                                                                                                                                                                                                                                                                                          |
| Details/Results extracted from source of evidence                                    |                                                                                                                                                                                                                                                                                                                                                                                                          |
| <b>SES effect on HP and patient relationship</b>                                     |                                                                                                                                                                                                                                                                                                                                                                                                          |

|                                                                                                                                                                          |  |
|--------------------------------------------------------------------------------------------------------------------------------------------------------------------------|--|
| <p><b>Implicit biases, attitudes or behaviours that connect SES and decision making</b></p>                                                                              |  |
| <p><b>Healthcare professionals' decision making, and the impact of the decisions made</b><br/> <b>Types of Healthcare professionals, care context and/or setting</b></p> |  |
| <p><b>Recommendations for practice to mitigate bias</b></p>                                                                                                              |  |
| <p><b>Identify how SES was measured in the included papers.</b></p>                                                                                                      |  |

For peer review only

1  
2  
3  
4  
5  
6  
7  
8  
9  
10  
11  
12  
13  
14  
15  
16  
17  
18  
19  
20  
21  
22  
23  
24  
25  
26  
27  
28  
29  
30  
31  
32  
33  
34  
35  
36  
37  
38  
39  
40  
41  
42  
43  
44  
45  
46  
47  
48  
49  
50  
51  
52  
53  
54  
55  
56  
57  
58  
59  
60

1  
2  
3 Health Professionals implicit bias of patients with low socioeconomic status  
4 (SES) and its effects on clinical decision-making: A Systematic Scoping Review  
5  
6  
7

8  
9 Supplementary Material 4 – Characteristics of Included Publications  
10  
11  
12  
13  
14  
15  
16  
17  
18  
19  
20  
21  
22  
23  
24  
25  
26  
27  
28  
29  
30  
31  
32  
33  
34  
35  
36  
37  
38  
39  
40  
41  
42  
43  
44  
45  
46  
47  
48  
49  
50  
51  
52  
53  
54  
55  
56  
57  
58  
59  
60

For peer review only

|   | Author(s)<br>date<br>Country             | Type of Publication<br>Research design/method<br>(If applicable)                                                                             | Aim(s)<br>(If stated)                                                                                                                     | Population<br>Professional<br>Specialty                 | Concept<br>SES Measure                                                                                                                                             | Context<br>Link HP<br>Bias &<br>Decision-<br>making | Key results, findings, or information                                                                                                                                                                                                                                                                                                                                                                                                                    |
|---|------------------------------------------|----------------------------------------------------------------------------------------------------------------------------------------------|-------------------------------------------------------------------------------------------------------------------------------------------|---------------------------------------------------------|--------------------------------------------------------------------------------------------------------------------------------------------------------------------|-----------------------------------------------------|----------------------------------------------------------------------------------------------------------------------------------------------------------------------------------------------------------------------------------------------------------------------------------------------------------------------------------------------------------------------------------------------------------------------------------------------------------|
| 1 | Crane (1975)<br><br>USA                  | <b>Research Paper</b><br>Vignette case studies and<br>Questionnaire                                                                          | To assess the<br>appropriateness of social<br>as compared to<br>physiological criteria in<br>deciding to treat critically<br>ill patient. | <b>Doctors</b> Internal<br>Medicine and<br>Neurosurgery | Case studies based on<br>occupation and employment.<br>A Banker and an unemployed<br>Labourer.                                                                     | <b>Yes</b>                                          | doctors did differentiate between a patient with a high and low status<br>occupation when making decisions about the aggressiveness of treatment<br>offered. However, when asked to rank the relative influence of social<br>characteristics upon their decisions to treat chronically ill patients, they ranked<br>social criteria as having a low influence on their decision-making.                                                                  |
| 2 | Eisenberg (1979)<br><br>USA              | <b>Editorial/Comment</b><br>NA                                                                                                               | Sociologic Influences on<br>Decision-Making by<br>Clinicians                                                                              | <b>Doctors</b><br>Specialism not<br>specified.          | This paper reviews the<br>contributions to our<br>understanding of sociologic<br>influences on clinical decision-<br>making.                                       | <b>NA</b>                                           | The bulk of the available literature implies a significant relation between social<br>class and decisions regarding patient management. Further investigation is<br>needed- various methods of sociologic research could be used to provide the<br>data for these studies e.g., participant observation, record review,<br>questionnaires, interviews, case studies, or direct recording of the interaction.                                             |
| 3 | MacCormick et al<br>(1990)<br><br>Canada | <b>Research Paper</b><br>Vignette – Four clinical<br>scenarios                                                                               | To assess decision-<br>making in cancer<br>treatments using age and<br>SES as independent<br>variables.                                   | <b>Medical<br/>Students</b>                             | Occupation and employment<br>were used as a proxy for SES.<br>In this study SES was assessed<br>with age. and it is difficult to<br>separate these in the results. | <b>Yes</b>                                          | Personal bias of the physician plays a role in decision-making about treatment<br>for cancer in these vignettes. It is difficult to separate age and SES these in the<br>results.<br>Statistically significant differences $p < 0.001$ in decisions to treat younger<br>professional than older persons.<br>Statistically significant differences $p < 0.001$ in decisions to treat a young mother<br>than a young female “mentally handicapped” person. |
| 4 | Brown (1993)<br><br>USA                  | <b>Research Paper</b><br>Interviews and focus<br>groups. seventy-two<br>health, social work,<br>administrative research,<br>and advocacy HPs | Exploration of class and<br>confidentiality for<br>mothers with HIV.                                                                      | <b>Multi-<br/>professional</b><br>Obstetrics:           | Income                                                                                                                                                             | <b>Yes</b>                                          | Lower social class people not viewed as holding their confidentiality as a<br>personal priority - it matters less to them.<br>Mums with greater authority due to income, political or social standings can<br>expect greater confidentiality compared to mothers who are less economically<br>fortunate.                                                                                                                                                 |
| 5 | McKinlay et al<br>(1996)<br><br>USA      | <b>Research Paper</b><br>Vignette video scenarios<br><br>1. Chest pain<br>2. Dyspnoea                                                        | To assess non-medical<br>influences on decision-<br>making.                                                                               | <b>Doctors</b><br>coronary heart<br>disease.            | socioeconomic status, and<br>health insurance coverage.                                                                                                            | <b>Yes</b>                                          | A link found between insurance coverage on cardiac diagnosis for chest pain,<br>particularly in the older patients. Intersectionality with Age.<br><br>Among the older patients, those with insurance were significantly more likely to<br>receive the primary cardiac diagnosis than those without insurance, whereas<br>among younger patients' insurance had no effect.                                                                               |
| 6 | McKinlay et al.<br>(1997)<br><br>USA     | <b>Research Paper</b><br>Vignette cancer video<br>scenarios involving a<br>breast mass                                                       | To assess non-medical<br>influences on decision-<br>making                                                                                | <b>Doctors</b> Breast<br>Cancer                         | Patient characteristics were<br>varied in the videotapes to<br>indicate socioeconomic status:<br>dress, grammatical style, and<br>insurance status                 | <b>Yes</b>                                          | Women of lower SES were more likely to receive less aggressive care ( $p < 0.07$ ).<br>physicians recommended either chemotherapy or tamoxifen to 73% of higher<br>SES women, compared with 53% of lower SES women. Insurance and ability to<br>pay also were associated with disparity in physician recommendations.                                                                                                                                    |

|    | Author(s)<br>date<br>Country          | Type of Publication<br>Research design/method<br>(If applicable)                                                        | Aim(s)<br>(If stated)                                                                                                                                                                                                      | Population<br>Professional<br>Specialty        | Concept<br>SES Measure                                                                                                                                                                                                                                                                                                                                                                                                                                                                                                               | Context<br>Link HP<br>Bias &<br>Decision-<br>making | Key results, findings, or information                                                                                                                                                                                                                                                                                                        |
|----|---------------------------------------|-------------------------------------------------------------------------------------------------------------------------|----------------------------------------------------------------------------------------------------------------------------------------------------------------------------------------------------------------------------|------------------------------------------------|--------------------------------------------------------------------------------------------------------------------------------------------------------------------------------------------------------------------------------------------------------------------------------------------------------------------------------------------------------------------------------------------------------------------------------------------------------------------------------------------------------------------------------------|-----------------------------------------------------|----------------------------------------------------------------------------------------------------------------------------------------------------------------------------------------------------------------------------------------------------------------------------------------------------------------------------------------------|
| 7  | Feldman et al<br>1997<br><br>USA      | <b>Research Paper</b><br>An Experimental<br>Technique Using<br>Videotapes, Factorial<br>Design, and Survey<br>Sampling. | To assess non-medical<br>influences on decision-<br>making.                                                                                                                                                                | <b>Doctors</b><br>Secondary care               | Challenging to ascertain how<br>SES was measured or<br>described                                                                                                                                                                                                                                                                                                                                                                                                                                                                     | <b>No</b>                                           | The data suggest that the physician subjects gave clinically valid answers to the questions and that the variations in clinical decision-making identified by the factorial experiment can be interpreted as generalizable differences.                                                                                                      |
| 8  | Wolder-Leven et al<br>1998<br><br>USA | <b>Editorial/Comment</b><br>Social Class and Medical<br>Decision-making                                                 | People of different<br>classes may receive<br>differential treatment<br>from providers for the<br>same health conditions<br>due to discrimination<br>based on class.                                                       | <b>Doctors</b><br>Specialism not<br>specified. | Paper discusses SES measures<br>- as indicators of class. The<br>word class works as a<br>shorthand to refer to a<br>person's social location, a<br>"lived reality," in which life<br>chances, values, health and<br>well-being, morbidity and<br>mortality, and concepts of self,<br>other, and collectively are<br>shaped by the relationship of<br>the individual to the social<br>organization of production.<br>Should stop trying to define<br>class in terms of a set of<br>socioeconomic indicators such<br>as income level. | <b>NA</b>                                           | it is important to recognize that giving people the same choices about medical treatments does not necessarily mean that they are being treated equally, because patients do not lead equal lives. At the point of medical decision-making it becomes clear that class-based differences can even lead to difference between life and death. |
| 9  | Parens 1998<br><br>USA                | <b>Editorial/Comment</b><br>Social Class and Medical<br>Decision-making.                                                | Bioethicists often discuss<br>issues of social class in<br>relation to access to<br>health<br>services - bioethics<br>literature reveals that<br>class is rarely a focus<br>in the analysis of medical<br>decision-making. | <b>Doctors</b><br>Specialism not<br>specified. | considering a person's SES<br>might lead to not offering<br>treatment to a person who<br>does not have the resources<br>and only offering it to people<br>with those resources. An<br>understanding of class and its<br>relationship to medical<br>decision-making should be<br>used to provide equity and not<br>to explain away unwarranted<br>variations in care.                                                                                                                                                                 | <b>NA</b>                                           | Health care providers need to listen to patients in unaccustomed ways, the next and much bigger step will be to think systematically about how to promote such listening particularly with time constraints on health professionals.                                                                                                         |
| 10 | Krupat et al 1999<br><br>USA          | <b>Research Paper</b><br>Vignette – Video                                                                               | To determine whether<br>assertive patient<br>behaviour influences<br>physician decision-<br>making in the treatment<br>of older breast cancer<br>patients.                                                                 | <b>Doctors</b><br>Cancer                       | Socioeconomic status [as well<br>as age, race, mobility, general<br>health, and assertive<br>behaviour] of the patients<br>were varied.                                                                                                                                                                                                                                                                                                                                                                                              | <b>Yes</b>                                          | Assertive behaviour on behalf of a women with lower SES helps them to get testing e.g., auxiliary node biopsy. Assertiveness led to more careful diagnostic testing for patients who came from groups that are "disadvantaged."                                                                                                              |

|                                                                      | Author(s)<br>date<br>Country             | Type of Publication<br>Research design/method<br>(If applicable)                                                                             | Aim(s)<br>(If stated)                                                                                                                                 | Population<br>Professional<br>Specialty                 | Concept<br>SES Measure                                                                                                                                                                                                                                                                                                              | Context<br>Link HP<br>Bias &<br>Decision-<br>making | Key results, findings, or information                                                                                                                                                                                                                                                                                                                                                                                                                                                                                                                                                                          |
|----------------------------------------------------------------------|------------------------------------------|----------------------------------------------------------------------------------------------------------------------------------------------|-------------------------------------------------------------------------------------------------------------------------------------------------------|---------------------------------------------------------|-------------------------------------------------------------------------------------------------------------------------------------------------------------------------------------------------------------------------------------------------------------------------------------------------------------------------------------|-----------------------------------------------------|----------------------------------------------------------------------------------------------------------------------------------------------------------------------------------------------------------------------------------------------------------------------------------------------------------------------------------------------------------------------------------------------------------------------------------------------------------------------------------------------------------------------------------------------------------------------------------------------------------------|
| 1<br>2<br>3<br>4<br>5<br>6<br>7<br>8<br>9<br>10<br>11<br>12          | 11<br>Gordon et al 2000<br><br>USA       | <b>Research Paper</b><br>Cross-sectional study<br>design, interviews using<br>semi-structured<br>questionnaire of<br>physicians and patents. | An assessment of<br>Patient-Nephrologist<br>discussions about kidney<br>transplantation as a<br>treatment option                                      | <b>Doctors</b><br>Haemodialysis<br>and<br>Nephrologists | SES determined by education<br>level, occupational level, and<br>socioeconomic status level. All<br>low to high rated.                                                                                                                                                                                                              | <b>Yes</b>                                          | Bias is not overtly discussed however finding show fewer medical explanations<br>and less time spent with patients of Low SES. Patient age and socioeconomic<br>status influence discussions of transplantation as a treatment option. low<br>socioeconomic status patients were less likely to report being encouraged even<br>after adjustment for transplant suitability.                                                                                                                                                                                                                                   |
| 13<br>14<br>15<br>16<br>17<br>18                                     | 12<br>Van-Ryn et al 2000<br><br>USA      | <b>Research Paper</b><br>Survey data examined                                                                                                | The degree to which<br>patient race and socio-<br>economic status effects<br>physicians' perceptions<br>of patients                                   | <b>Doctors</b><br>post-angiogram<br>care.               | A three-category measure of<br>SES was developed. The SES<br>index was created by<br>standardizing patient income<br>and education and averaging<br>the two together.                                                                                                                                                               | <b>Yes</b>                                          | Intersectionality with race is difficult to unpick. Low SES patients viewed as less<br>likely to be pleasant and rationale. physicians gave lower SES patients more<br>negative ratings on personality characteristics (lack of self-control, irrationality)<br>and level of intelligence.                                                                                                                                                                                                                                                                                                                     |
| 19<br>20<br>21<br>22                                                 | 13<br>McKinlay et al<br>2002<br><br>USA  | <b>Research Paper</b><br>Vignette video study<br><br>1. Polymyalgia<br>2. Depression                                                         | To assess the influence<br>of non-medical factors<br>on decision-making.                                                                              | <b>Doctors</b><br>Internalist and<br>primary care       | SES depicted by appearance<br>and employment in the video<br>vignettes                                                                                                                                                                                                                                                              | <b>No</b>                                           | SES of the patient does not show any impact on decision-making.                                                                                                                                                                                                                                                                                                                                                                                                                                                                                                                                                |
| 23<br>24<br>25<br>26<br>27<br>28<br>29<br>30                         | 14<br>Tamayo-Sarver<br>(2003)<br><br>USA | Vignette<br><br>1. Ankle Fracture<br>2. Migraine<br>Non-traumatic back pain.                                                                 | To measure the Effect of<br>Race/Ethnicity and<br>Desirable Social<br>Characteristics on<br>Physicians Decisions to<br>Prescribe Opioid<br>Analgesics | <b>Doctors</b><br>Emergency<br>Department               | Occupation and/or<br>relationship with a primary<br>care provider.                                                                                                                                                                                                                                                                  | <b>Yes</b>                                          | Race did not impact on prescribing differences.<br>SES and information about patient social desirability (e.g., occupation)<br>increased the rates of prescribing for the migraine and back pain patient<br>vignette, but this did not alter the rate for ankle fracture. There were<br>statistically discernible increases in the rate of prescribing, 4% (p<0.04) for<br>migraine and 6% (p<0.01) for back pain.<br>The information on socially desirable characteristics may have affected<br>physicians' perceived likelihood that the patient is feigning illness and<br>surreptitiously seeking opioids. |
| 31<br>32<br>33<br>34<br>35<br>36<br>37<br>38<br>39<br>40<br>41<br>42 | 15<br>Henley et al 2004<br><br>USA       | <b>Editorial/Comment</b><br>10 steps for avoiding<br>health disparities in your<br>practice                                                  | Discussion about<br>disparities and health<br>inequalities.                                                                                           | <b>Doctors</b><br>Specialism not<br>specified.          | Discusses intersectionality.<br>The evidence regarding<br>differences in the care of<br>patients based on race,<br>ethnicity, gender, and<br>socioeconomic status suggests<br>that if this patient is a woman<br>or African American or from<br>a lower socioeconomic class,<br>resultant morbidity or<br>mortality will be higher. | <b>NA</b>                                           | Recommends that minimising the effect of bias and stereotyping could be<br>achieved for all patients by using evidence-based practice guidelines.                                                                                                                                                                                                                                                                                                                                                                                                                                                              |



|    | Author(s)<br>date<br>Country       | Type of Publication<br>Research design/method<br>(If applicable)                                                                                            | Aim(s)<br>(If stated)                                                                                                                            | Population<br>Professional<br>Specialty      | Concept<br>SES Measure                                                                                                                                                                             | Context<br>Link HP<br>Bias &<br>Decision-<br>making | Key results, findings, or information                                                                                                                                                                                                                                                                                                   |
|----|------------------------------------|-------------------------------------------------------------------------------------------------------------------------------------------------------------|--------------------------------------------------------------------------------------------------------------------------------------------------|----------------------------------------------|----------------------------------------------------------------------------------------------------------------------------------------------------------------------------------------------------|-----------------------------------------------------|-----------------------------------------------------------------------------------------------------------------------------------------------------------------------------------------------------------------------------------------------------------------------------------------------------------------------------------------|
| 16 | Manderbacka<br>2005<br><br>Finland | <b>Research Paper</b><br>Exploratory qualitative<br>study                                                                                                   | Trace key points in the<br>treatment where<br>patients gender & SES<br>experience differences                                                    | <b>Doctors</b><br>Coronary heart<br>disease. | Blue-collar and white-collar<br>occupations                                                                                                                                                        | <b>Yes</b>                                          | There was a doctor-centred model common among blue-collar workers and an increased patient centred model with shared decision-making common among those using private care 'white collar occupations. The utilization of private care is clearly concentrated in higher socioeconomic groups in Finland.                                |
| 17 | Arber et al 2006<br><br>UK         | <b>Research Paper</b><br>A video-simulation<br>experiment.<br>Conducted<br>simultaneously in both<br>USA and UK                                             | Patient characteristics<br>and inequalities in<br>doctors' diagnostic and<br>management strategies<br>relating to CHD.                           | <b>Doctors</b><br>Coronary heart<br>disease  | SES indicated by occupation<br>and dress - middle class<br>(schoolteacher) or working<br>class (cleaner in UK; janitor in<br>US). Class was also expressed<br>by style of dress and<br>appearance. | <b>No</b>                                           | Class was not significantly associated with any aspect of doctors' information gathering or decision-making.                                                                                                                                                                                                                            |
| 18 | Barnhart et al<br>2006<br><br>USA  | <b>Research Paper</b><br>Questionnaires<br>developed from focus<br>groups.                                                                                  | Can Non-medical Factors<br>Contribute to Disparities<br>in Coronary Heart<br>disease treatments.                                                 | <b>Doctors</b><br>coronary heart<br>disease  | socioeconomic status<br>discussed in terms of finance<br>barriers - social support<br>(ability/insurance to pay for a<br>revascularization procedure)<br>as judged by the physician.               | <b>Yes</b>                                          | People with low SES were not trusted by the physician. Patients most knowledgeable (and assertive) about the procedure, and those with resources, who were most likely to adopt a healthy lifestyle (as perceived by the physician) are most likely to receive recommendations for revascularisation.                                   |
| 19 | Denburg et al<br>2006<br><br>USA   | <b>Research Paper</b><br>Randomised, 2X2<br>factorial design clinical<br>vignette.                                                                          | The Influence of Patient<br>Race and Social<br>Vulnerability on Urologist<br>Treatment<br>Recommendations in<br>Localized Prostate<br>Carcinoma. | <b>Doctor</b><br>Cancer                      | Middle income (and married)<br>Low Income (and widowed)<br>therefore the variables were<br>not distinct.                                                                                           | <b>Yes</b>                                          | Watchful waiting offered more frequently for socially vulnerable patients (low income and widowed) - both white and black patients. Intersectionality means that low income/widowed black patients received the lowest referral for radical prostatectomy. Low income/widowed white men also received lower referral for prostatectomy. |
| 20 | Bernheim et al<br>2008<br><br>USA  | <b>Research Paper</b><br>A Qualitative Study semi<br>structured interviews                                                                                  | Influence of Patients'<br>Socioeconomic Status on<br>Clinical Management<br>Decisions.                                                           | <b>Doctors</b> Primary<br>care               | As described by the<br>participants: Economic<br>Uninsured - Unemployed- On<br>welfare- Sociocultural- Low<br>educational achievement-<br>Poor social networks.                                    | <b>Yes</b>                                          | All physicians recounted circumstances in which the patient's SES did affect their clinical management decisions. Even physicians who initially asserted that all patients in their practice received identical care later described differences based on patient SES.                                                                  |
| 21 | Eggyly et al 2008<br><br>USA       | <b>Research Paper</b><br>Video recorded<br>outpatient interactions<br>during which oncologists<br>invited patients to<br>participate in clinical<br>trials. | Oncologists'<br>recommendations of<br>clinical trial participation<br>to patients                                                                | <b>Doctors</b> cancer                        | SES determined by education:<br>high school or less<br>technical or trade school<br>college or greater.                                                                                            | <b>No</b>                                           | Data showed that people with higher education (0.07) received more recommendations than men and those with lower education. This was not statistically significant.                                                                                                                                                                     |

| Author(s)<br>date<br>Country         | Type of Publication<br>Research design/method<br>(If applicable)                                                                                                                                                                     | Aim(s)<br>(If stated)                                                                                                                                                                                                                                                                | Population<br>Professional<br>Specialty                    | Concept<br>SES Measure                                                                                                                                                                                      | Context<br>Link HP<br>Bias &<br>Decision-<br>making | Key results, findings, or information                                                                                                                                                                                                                                                                                                                        |
|--------------------------------------|--------------------------------------------------------------------------------------------------------------------------------------------------------------------------------------------------------------------------------------|--------------------------------------------------------------------------------------------------------------------------------------------------------------------------------------------------------------------------------------------------------------------------------------|------------------------------------------------------------|-------------------------------------------------------------------------------------------------------------------------------------------------------------------------------------------------------------|-----------------------------------------------------|--------------------------------------------------------------------------------------------------------------------------------------------------------------------------------------------------------------------------------------------------------------------------------------------------------------------------------------------------------------|
| 22<br>Ling Fan et al 2008<br>USA     | <b>Review</b><br>A search of the Internet identified thousands of Web sites, documents, reports, and educational materials pertaining to health and pain disparities.                                                                | Awareness and Action for Eliminating Health Care Disparities in Pain Care: Web-Based                                                                                                                                                                                                 | <b>Multi-professional</b><br>Palliative care.              | Paper discusses SES                                                                                                                                                                                         | NA                                                  | Studies have explored the factors influencing the often-unintentional pervasive nature of biases and stereotyping that affect treatment decisions for managing pain. Discriminatory practices that are deep seated in biases, stereotypes, and uncertainties around communication and decision-making processes contributing to inequities in care.          |
| 23<br>Franks et al 2008<br>USA       | <b>Editorial/Comment</b><br>This paper examines a hierarchy of three domains for interventions to address health inequalities downstream.<br><br>1. health system<br>2. provider-patient interactions<br>3. clinical decision-making | Upstream or fundamental causes (such as poverty, limited education, and compromised healthcare access) is essential to reduce healthcare disparities. But such approaches are not sufficient, and downstream interventions, addressing the consequences of those fundamental causes. | <b>Doctors</b><br>Specialism not specified.                | Paper discusses SES                                                                                                                                                                                         | NA                                                  | Physician biases likely to contribute to disparities. Greater social and cultural distance between providers and patients increases the potential for suboptimal encounters. Patients at greater social risk for adverse health outcomes have encounters characterized by less patient participation and providers viewing those encounters more negatively. |
| 24<br>Nampiarampil et al 2009<br>USA | <b>Research Paper</b><br>Vignette - double-blinded randomized controlled study. 1. patient with chronic low back. 2. lower extremity pain                                                                                            | To assess the contribution of non-medical decision-making to the assessment and management of pain.                                                                                                                                                                                  | <b>Doctors</b><br>rehabilitation<br>community<br>hospitals | Medical insurance<br><br>Blue Cross Vs Medicaid                                                                                                                                                             | Yes                                                 | Unable to unpick race and insurance status in these vignette examples. Patient ethnicity/SES differences in the prescription of morphine (p = 0.053). Patient ethnicity/SES significantly affected the rate of referral for a nerve block (P = 0.04).                                                                                                        |
| 25<br>Wilson 2009<br>UK              | <b>Research Paper</b><br>Vignette – case scenarios. One of two patient scenarios was employed in a self-administered questionnaire                                                                                                   | Scenarios and Questionnaires addressed pain knowledge, inferences of physical pain, general attitudes, and beliefs about pain management. The participants were required to identify the patient's pain level and make pain management decisions.                                    | <b>Nurses</b><br>pain                                      | The variable lifestyle/socio-economic status (SES) of the patient was manipulated; all other patient variables were kept constant.<br>High SES - businessperson<br>Low SES - unemployed construction worker | Yes                                                 | There was a difference in pain management between high and low SES patients - both general and CNS nurses showed inferences of patient pain and management decisions which are based on myths about Low SES addiction. There was an observed trend to be more likely to under medicate low SES over high SES patients.                                       |

|    | Author(s)<br>date<br>Country                          | Type of Publication<br>Research design/method<br>(If applicable)                                                                                                                                          | Aim(s)<br>(If stated)                                                                                                                                                                                                              | Population<br>Professional<br>Specialty  | Concept<br>SES Measure                                                                  | Context<br>Link HP<br>Bias &<br>Decision-<br>making | Key results, findings, or information                                                                                                                                                                                                                                                                                                                                                                                                                                                                                                                                                                                                                |
|----|-------------------------------------------------------|-----------------------------------------------------------------------------------------------------------------------------------------------------------------------------------------------------------|------------------------------------------------------------------------------------------------------------------------------------------------------------------------------------------------------------------------------------|------------------------------------------|-----------------------------------------------------------------------------------------|-----------------------------------------------------|------------------------------------------------------------------------------------------------------------------------------------------------------------------------------------------------------------------------------------------------------------------------------------------------------------------------------------------------------------------------------------------------------------------------------------------------------------------------------------------------------------------------------------------------------------------------------------------------------------------------------------------------------|
| 26 | Ceballos et al 2010<br><br>USA                        | <b>Research Paper</b><br>A three-page survey was mailed to physicians in one state. Case scenario of a young woman trying to get pregnant. The patient's race and social class varied across the surveys. | Surveyed about their knowledge of infertility among different demographic groups of women and examines how patient and physician characteristics may influence physicians' treatment responses to hypothetical infertile patients. | <b>Doctors</b> Family planning           | Different educational groups were used to reflect social class differences among women. | <b>No</b>                                           | Referral practices did vary related to insurance status of the patient. Physicians' reluctance to refer Medicaid patients to infertility specialists is explained as understandable given the great expense of specialized infertility services and the lack of Medicaid insurance coverage for such services.                                                                                                                                                                                                                                                                                                                                       |
| 27 | Gilbert et al 2010<br><br>Canada                      | <b>Research Paper</b><br>A retrospective cohort study of women with a previous Caesarean section.                                                                                                         | Does Education Level Influence the Decision to Undergo Elective Repeat Caesarean Section Among Women with a Previous Caesarean Section.                                                                                            | <b>Doctors</b> Obstetrics                | Education level was stratified.                                                         | <b>Yes</b>                                          | Higher education is associated with an increased rate of elective repeat Caesarean section (p<0.047 and p<0.03). Whether this is due to patient differences or physician bias, physicians should be aware of this disparity and should attempt to provide unbiased informed consent for all women                                                                                                                                                                                                                                                                                                                                                    |
| 28 | Hajjaj et al 2010<br><br>UK                           | <b>Research Paper</b><br>Semi-structured qualitative interviews were conducted with clinicians working in departments of dermatology                                                                      | Assessment of nonclinical influences, beyond diagnosis and severity, on clinical decision-making in dermatology.                                                                                                                   | <b>Doctors</b> Dermatology               | Education level and financial status and treatment related costs                        | <b>Yes</b>                                          | This paper does not offer a strong link between SES and decision-making. Sixty five percent of clinicians said that treatment-related costs that patients are likely to incur would sometimes influence their decision-making inability to afford transportation costs or cost of child minding at home. 19.6% clinicians raised education/intelligence as an issue especially relating to cases where systemic treatments with potential side-effects are required. Where there is a lack of awareness or understanding of the range of influences, there is a risk that some influences may *subconsciously* adversely impact on optimal decision. |
| 29 | Kristine Bærøe and Berit Bringedal 2011<br><br>Norway | <b>Editorial/Comment</b><br>A discussion about the conditions for acceptable and unacceptable priority settings with respect to patients' socioeconomic status.                                           | The pattern is equal in all countries, the higher the socioeconomic status (SES) of patients, the better the health and the higher the life expectancy; health prospects are distributed along a social gradient.                  | <b>Doctors</b> Specialism not specified. | Paper discussed SES                                                                     | <b>NA</b>                                           | Health inequity in healthcare services by inaccurate interpretations of 'healthcare need' and biased care due to unconscious influence by patients' SES. Prioritisation of health need according to SES as a basis of equity is not ethical. Socioeconomic Factors and their impact on health should be forefront of HP thinking - raising awareness in order to prevent reinforcement of health inequity.                                                                                                                                                                                                                                           |
| 30 | Detsky 2010<br><br>USA                                | <b>Editorial/Comment</b><br>HP provide services and make decisions about diagnostics, treatments, procedures etc. There are variations.                                                                   | The paper discusses... GPs and surgeons are biased against women, people from low SES groups, and other minority groups?                                                                                                           | <b>Doctors</b> Specialism not specified. | Paper discussed SES                                                                     | <b>NA</b>                                           | Unintentional bias, which is far more common than intentional corruption, is particularly worrisome because humans are facile with rationalizing and often are not even aware of their bias. It is difficult to overcome bias that one does not even know is there.                                                                                                                                                                                                                                                                                                                                                                                  |

| Author(s)<br>date<br>Country     | Type of Publication<br>Research design/method<br>(If applicable)                                                                                                                      | Aim(s)<br>(If stated)                                                                                                                                                                                                                          | Population<br>Professional<br>Specialty          | Concept<br>SES Measure                                                                                                                                                                                                                        | Context<br>Link HP<br>Bias &<br>Decision-<br>making | Key results, findings, or information                                                                                                                                                                                                                                                                                                                                                                                                                                                                                                                                              |
|----------------------------------|---------------------------------------------------------------------------------------------------------------------------------------------------------------------------------------|------------------------------------------------------------------------------------------------------------------------------------------------------------------------------------------------------------------------------------------------|--------------------------------------------------|-----------------------------------------------------------------------------------------------------------------------------------------------------------------------------------------------------------------------------------------------|-----------------------------------------------------|------------------------------------------------------------------------------------------------------------------------------------------------------------------------------------------------------------------------------------------------------------------------------------------------------------------------------------------------------------------------------------------------------------------------------------------------------------------------------------------------------------------------------------------------------------------------------------|
| 31<br>Paul Dieppe 2011<br>UK     | <b>Editorial/Comment</b><br>A discussion about the inequalities in the provision of surgical Interventions for people with Rheumatology conditions.                                   | In the context of state provided healthcare - many studies have shown that older people, women, ethnic minorities, and those of lower SES are all likely to receive variations in interventions compared to well-off, middle aged white males. | <b>Doctors</b><br>Rheumatology                   | Paper discussed SES                                                                                                                                                                                                                           | <b>NA</b>                                           | The paper finds significant effects of SES on both hip and knee joint replacement rates for people with Osteoarthritis.<br><br>It suggests that GPs and surgeons are biased against women, low SES patients, and other minority groups.                                                                                                                                                                                                                                                                                                                                            |
| 32<br>Dougal et al 2010<br>USA   | <b>Research Paper</b><br>Online national survey                                                                                                                                       | the influence of SES was examined on psychotherapists cognitive attributions and counter-transferences.                                                                                                                                        | <b>Psychological therapists</b><br>Mental Health | Paper discusses SES                                                                                                                                                                                                                           | <b>Yes</b>                                          | SES impacts on counter-transference reactions and clinical judgments according to SES. Rated interpersonal behaviour of the client with higher SES has evoking feelings of dominance more so than the lower SES. CAS measurement of 'causal attribution' found no statistically significant differences related to clinical judgment                                                                                                                                                                                                                                               |
| 33<br>Haider et al 2010<br>USA   | <b>Research Paper</b><br>Clinical vignettes. The survey included the Implicit Association Test (IAT) to assess unconscious preferences                                                | To estimate unconscious race and social class bias among first-year medical students and investigate its relationship with assessment.                                                                                                         | <b>Medical students</b>                          | Social class was depicted using occupation. Patient vocation is commonly used as a proxy for social class. Patient occupations were chosen using the NamPowers occupational prestige scale, which ranks occupations on a scale from 1 to 100. | <b>No</b>                                           | IAT testing showed A preference toward those in the upper class among 174 students (86%). a lower-class preference in 6 (3%).<br>Multivariable analyses for all vignettes found no significant relationship between implicit biases and clinical assessment.<br>Analysis stratified by patient race or class did not demonstrate any statistically significant association between student IAT scores and how students assessed patients for any of the vignettes.<br>No interaction between IAT D scores and vignette patient class (or race) was found for any of the vignettes. |
| 34<br>McKinlay et al 2012<br>USA | <b>Research Paper</b><br>A factorial experiment using video vignettes was conducted.<br><br>1. Patient symptoms of diabetes<br>2. Known diabetes with emerging peripheral neuropathy. | To investigate additional causes of health care disparities in the decision-making of primary care doctors.                                                                                                                                    | <b>Doctors</b><br>Primary care                   | Appearance altered to reflect Class. Men presented with collar and tie (upper SES) or plaid shirt and jacket (lower SES). Women presented with either blazer with brooch and makeup (high SES) or sweatshirt and no makeup (lower SES).       | <b>Yes</b>                                          | clinical management (specifically for foot neuropathy) is influenced by patient socioeconomic status (SES). Overall, upper SES patients would receive these essential examinations compared with lower SES patients. Upper SES patients were slightly more likely to be asked questions about their medical history (P < 0.05 for history of eye disease) and were more frequently referred to ophthalmologist (P = 0.024).                                                                                                                                                        |

|                                                                                                                | Author(s)<br>date<br>Country                 | Type of Publication<br>Research design/method<br>(If applicable)                                                                                                                                                                                                                                                                                                                                                                                  | Aim(s)<br>(If stated)                                                                                                                                                                                                         | Population<br>Professional<br>Specialty                                                 | Concept<br>SES Measure                                                                                                                | Context<br>Link HP<br>Bias &<br>Decision-<br>making | Key results, findings, or information                                                                                                                                                                                                                                                                                                                                                                                                                                                                                                                                                                                                               |
|----------------------------------------------------------------------------------------------------------------|----------------------------------------------|---------------------------------------------------------------------------------------------------------------------------------------------------------------------------------------------------------------------------------------------------------------------------------------------------------------------------------------------------------------------------------------------------------------------------------------------------|-------------------------------------------------------------------------------------------------------------------------------------------------------------------------------------------------------------------------------|-----------------------------------------------------------------------------------------|---------------------------------------------------------------------------------------------------------------------------------------|-----------------------------------------------------|-----------------------------------------------------------------------------------------------------------------------------------------------------------------------------------------------------------------------------------------------------------------------------------------------------------------------------------------------------------------------------------------------------------------------------------------------------------------------------------------------------------------------------------------------------------------------------------------------------------------------------------------------------|
| 1<br>2<br>3<br>4<br>5<br>6<br>7<br>8<br>9<br>10<br>11<br>12<br>13<br>14<br>15<br>16<br>17                      | 35<br>Shawahna et al<br>2012<br><br>Pakistan | <b>Research Paper</b><br>Qualitative with two<br>observational phases.<br>Semi-structured<br>interviews - 2 hospitals, 2<br>diabetes care centres and<br>2 private clinics.<br>Prescriptions were<br>analysed for<br>socioeconomic indicators.<br>In the second phase, the<br>opinions of a panel of<br>prescribers on the<br>influence socioeconomic<br>indicators on prescribing<br>behaviour were elicited.                                    | To investigate physician's<br>perspectives of patients'<br>SES and the important<br>indicators influencing<br>prescribing behaviour.                                                                                          | <b>Doctors</b><br>Diabetes                                                              | participants described SES<br>based on 'job role' and a<br>judgment about whether the<br>person might be able to afford<br>treatment. | <b>Yes</b>                                          | Literacy, educational background, compliance, dress, and appearance were<br>important indicators at the time of clinical decision-making for physicians<br>originating from urban areas. Participating physicians agreed that patient's<br>socioeconomic status influenced their drug prescribing behaviour                                                                                                                                                                                                                                                                                                                                         |
| 18<br>19<br>20<br>21<br>22<br>23                                                                               | 36<br>Smith-oka 2012<br><br>Mexico           | <b>Research Paper</b><br>Interviews and<br>participant observation                                                                                                                                                                                                                                                                                                                                                                                | To investigate Risk –<br>motherhood in a<br>Mexican public hospital.                                                                                                                                                          | <b>Multi-<br/>professional<br/>Doctors,<br/>Midwives, and<br/>Nurses.</b><br>Obstetrics | Income and area of residence                                                                                                          | <b>Yes</b>                                          | Good mothers are married, knowledgeable, follows norms.<br>Bad mothers are unmarried, uneducated, deviant. These<br>views thought to reflect the paternalistic class structure of Mexican society.<br>Explicit bias of low SES single mothers evident in this research - linked again to<br>cooperation.<br>Pressure for sterilisation Vs the use of an IUD in low SES women.                                                                                                                                                                                                                                                                       |
| 24<br>25<br>26<br>27<br>28<br>29<br>30<br>31<br>32<br>33<br>34<br>35<br>36<br>37<br>38<br>39<br>40<br>41<br>42 | 37<br>Lay-Yee et al 2013<br><br>NZ           | <b>Research Paper</b><br>Sample of 9272<br>encounters at 185 family<br>practices. Each<br>practitioner was asked to<br>provide data on<br>themselves and on their<br>practice, and to report on<br>every fourth of their<br>patients (a 25% sample)<br>in each of two week-long<br>periods separated by an<br>interval of six months.<br>The questionnaire<br>recorded data about the<br>patient, his or her<br>problems and their<br>management. | social disparities in<br>health are pervasive<br>features of health care<br>systems. studying inter-<br>practitioner variation in<br>clinical activity across<br>four payment types in<br>New Zealand primary<br>care system. | <b>Doctors</b><br>Primary Care                                                          | deprivation level - NZ multi-<br>index of deprivation used<br>quintiles 1-5                                                           | <b>Yes</b>                                          | There was greater variability of practitioner decision-making for socially<br>disadvantaged patients found in fee-for service settings.<br>Practitioners may have difficulty processing relevant clinical information for<br>socially disadvantaged patients, and this greater degree of uncertainty may in<br>turn be reflected in more variable decision-making.<br>While there was little evidence in this primary care sample of systematic bias in<br>clinical activity level by patient social group, practitioner variability was much<br>more marked for patients drawn from ethnically and socio-economically<br>disadvantaged background. |

| Author(s)<br>date<br>Country        | Type of Publication<br>Research design/method<br>(If applicable)                                                                                                                                                                                                                     | Aim(s)<br>(If stated)                                                                                                | Population<br>Professional<br>Specialty | Concept<br>SES Measure                                                                                                                      | Context<br>Link HP<br>Bias &<br>Decision-<br>making | Key results, findings, or information                                                                                                                                                                                                                                                                                                                                                                                                                                                                                                          |
|-------------------------------------|--------------------------------------------------------------------------------------------------------------------------------------------------------------------------------------------------------------------------------------------------------------------------------------|----------------------------------------------------------------------------------------------------------------------|-----------------------------------------|---------------------------------------------------------------------------------------------------------------------------------------------|-----------------------------------------------------|------------------------------------------------------------------------------------------------------------------------------------------------------------------------------------------------------------------------------------------------------------------------------------------------------------------------------------------------------------------------------------------------------------------------------------------------------------------------------------------------------------------------------------------------|
| 38<br>Haider et al 2014<br>USA      | <b>Research Paper</b><br>Participants completed nine clinical vignettes, each with three trauma/acute care surgery management questions. social class IAT assessments were completed by each participant. Multivariable, ordered logistic regression to test IAT on decision-making. | To assess Unconscious race and class bias and its association with decision-making by trauma and acute care surgeons | <b>Doctors</b><br>Trauma                | Social class stated in Vignette.                                                                                                            | <b>No</b>                                           | 90.7% demonstrated an implicit preference toward upper social class persons.<br><br>Biases were not statistically significantly associated with clinical decision-making So despite high levels of implicit bias this did not alter the decisions made by the physician in a statistically significant way.                                                                                                                                                                                                                                    |
| 39<br>Haider et al 2015<br>USA      | <b>Research Paper</b><br>Prospective Vignette study conducted among surgical RNs. Implicit association tests (IATs) for social class and race. Ordered logistic regression                                                                                                           | To assess unconscious Race and Class Biases among Registered Nurses.                                                 | <b>Nurses</b><br>Surgery                | patients' race or social class were randomly altered. Social class vignettes used patients' occupations as proxies for their social status. | <b>No</b>                                           | 93.47% demonstrated an implicit preference toward upper social class persons. Participants were more likely to think that a lower SES with anxiety did not understand the procedure and needed to be re-consented. Intersectionality detected between race and SES and the use of post-surgical restraints and sedation. Implicit biases among RNs did not correlate with clinical decision-making. Presence of an unconscious bias was not associated with any overall differences in vignette-based clinical assessment and decision-making. |
| 40<br>Haider et al 2015<br>USA      | <b>Research Paper</b><br>Clinical vignettes, each with 3 management questions. Ordered logistic regression analysis on the Implicit Association Test (IAT) scores and used multivariable analysis to determine whether implicit bias was associated with the vignette responses.     | To assess the relationship between unconscious bias and clinical decision-making                                     | <b>Doctors</b><br>Surgery               | The paper does not state how SES was communicated via the vignette style study.                                                             | <b>No</b>                                           | Although implicit biases of race and social class were present among most of the trauma and acute care clinician respondents, these biases were not associated with clinical decision-making. Clinicians were less likely to order an MRI of the cervical spine for patients with neck tenderness after a motor vehicle crash for low SES patients - this is hypothesised to be linked to health insurance status.                                                                                                                             |
| 41<br>John-Henderson<br>2015<br>USA | <b>Editorial/Comment</b><br>Implicit bias od SES discussed along with as implicit bias of race, gender, suicidal ideation, and obesity).                                                                                                                                             | Implicit cognition implications for global health                                                                    | <b>Doctors</b><br>Mental health         | paper discusses the use of the MacArthur SES scale - which is a self-rated 'place a cross on the ladder to indicate your position' scale    | <b>NA</b>                                           | Biases and discussed alongside resilience. The paper recommends an investigation into why some HPs make biased decisions and some do not. This could reduce the overall impact of implicit biases on health, both at the level of the individual and by positively affecting the relationship between patient and physician.                                                                                                                                                                                                                   |

|    | Author(s)<br>date<br>Country              | Type of Publication<br>Research design/method<br>(If applicable)                                                                                                                                                                           | Aim(s)<br>(If stated)                                                                                                                                                                                              | Population<br>Professional<br>Specialty       | Concept<br>SES Measure                                                                                                                                                              | Context<br>Link HP<br>Bias &<br>Decision-<br>making | Key results, findings, or information                                                                                                                                                                                                                                                                                                                                                                                                |
|----|-------------------------------------------|--------------------------------------------------------------------------------------------------------------------------------------------------------------------------------------------------------------------------------------------|--------------------------------------------------------------------------------------------------------------------------------------------------------------------------------------------------------------------|-----------------------------------------------|-------------------------------------------------------------------------------------------------------------------------------------------------------------------------------------|-----------------------------------------------------|--------------------------------------------------------------------------------------------------------------------------------------------------------------------------------------------------------------------------------------------------------------------------------------------------------------------------------------------------------------------------------------------------------------------------------------|
| 42 | Williams et al 2015<br><br>USA            | <b>Research Paper</b><br>Vignette based study - surveyed seniors at 84 medical schools. two clinically equivalent management options for a set of cardiac patient vignettes. examined variations in student recommendations.               | Investigation of variations in medical student recommendations based on patient race, gender, and socioeconomic status.                                                                                            | <b>Doctors</b><br>coronary heart disease      | Patient SES was determined solely by the Hollingshead Occupational Scale and was fixed for each individual vignette but varied across the set of eight cardiac vignettes.           | <b>Yes</b>                                          | Patient SES was a strong and significant predictor of student recommendations. With some intersectionality - when the patient was presented as being in the lowest SES group (SES 1–2), students were more likely to recommend procedures for black patients, and least likely to do so for white female patients. Judgmental attitudes from providers, even if not explicitly expressed, negatively affect physician–patient trust. |
| 43 | Castaneda-Guarderas et al 2016<br><br>USA | <b>Editorial/Comment</b><br>A discussion about shared decision-making with vulnerable Populations in the Emergency Department.                                                                                                             | This paper considers the future research agenda needed to examine shared decision-making with vulnerable populations of people who present to emergency departments in the U.S.                                    | <b>Doctors</b><br>Specialism not specified.   | Discussed in terms of Socioeconomic Disadvantage uneducated unemployed uninsured                                                                                                    | <b>NA</b>                                           | Shared decision-making in the ED setting among patients with socioeconomic challenges may be inhibited by a perceived power differential between physicians and their patients, beyond that experienced by more affluent patients.                                                                                                                                                                                                   |
| 44 | Elholm Madsen et al 2016<br><br>Denmark   | <b>Research Paper</b><br>An experimental factorial vignette survey was used. Four different vignettes describing fictitious patient cases with different SES variables were randomly allocated to therapists working in somatic hospitals. | To investigate whether occupational therapists and physiotherapists are influenced by the patient's SES                                                                                                            | <b>Occupational Therapist</b><br>Somatic care | Employment status and educational level were used as a proxy for SES. a white collar-worker (lawyer employed and unemployed) a blue collar-worker (janitor employed or unemployed); | <b>No</b>                                           | There were no statistically significant associations between the patient's SES and the judgements related to the patient's rehabilitation OR the rehabilitation effort given in phase one or towards providing equal treatment in a therapeutic situation.                                                                                                                                                                           |
| 45 | Popescu et al 2016<br><br>USA             | <b>Research Paper</b><br>Retrospective 1995 - 2007 data collected from the SEER programme. Key interests were race and SES.                                                                                                                | to understand whether between-physician and within physician variations play a role in cancer care disparities among seniors with breast and colorectal cancer enrolled in a national cancer surveillance program. | <b>Doctors</b> Cancer                         | Measured SES using patients' zip code median household income, categorized into deciles. SEER files contain several zip code and census tract-level SES variables.                  | <b>Yes</b>                                          | Patients residing in high-income zip codes were more likely to receive treatment than patients residing in low-income zip codes (e.g., 69%, 53%, and 65% top decile income patients received BCS, chemotherapy, and radiation vs. 46%, 48%, and 43% bottom decile income patients).                                                                                                                                                  |

|                                                                                           | Author(s)<br>date<br>Country                        | Type of Publication<br>Research design/method<br>(If applicable)                                                                                                                                                                                                                                                                                                                                                       | Aim(s)<br>(If stated)                                                                                                                                                                                                                                        | Population<br>Professional<br>Specialty       | Concept<br>SES Measure                                                                                                                                                                           | Context<br>Link HP<br>Bias &<br>Decision-<br>making | Key results, findings, or information                                                                                                                                                                                                                                                                                                                                                                                                                                                                |
|-------------------------------------------------------------------------------------------|-----------------------------------------------------|------------------------------------------------------------------------------------------------------------------------------------------------------------------------------------------------------------------------------------------------------------------------------------------------------------------------------------------------------------------------------------------------------------------------|--------------------------------------------------------------------------------------------------------------------------------------------------------------------------------------------------------------------------------------------------------------|-----------------------------------------------|--------------------------------------------------------------------------------------------------------------------------------------------------------------------------------------------------|-----------------------------------------------------|------------------------------------------------------------------------------------------------------------------------------------------------------------------------------------------------------------------------------------------------------------------------------------------------------------------------------------------------------------------------------------------------------------------------------------------------------------------------------------------------------|
| 1<br>2<br>3<br>4<br>5<br>6<br>7<br>8<br>9<br>10<br>11<br>12<br>13<br>14<br>15<br>16<br>17 | 46<br>Fitzgerald et al<br>2017<br><br>International | <b>Systematic Review</b><br>PubMed, PsychINFO,<br>PsychARTICLE and<br>CINAHL were searched<br>for peer-reviewed articles<br>published between 1st<br>March 2003 and 31st<br>March 2013. Two<br>reviewers assessed the<br>eligibility of the identified<br>papers based on precise<br>content and quality<br>criteria. The references of<br>eligible papers were<br>examined to identify<br>further eligible studies.   | To assess publications<br>examining implicit bias in<br>healthcare professionals.                                                                                                                                                                            | <b>Multi-<br/>professional</b><br>NA          | SES                                                                                                                                                                                              | <b>Yes</b>                                          | All studies found evidence for SES implicit biases among physicians and nurses. Class may trump race in some circumstances so that being high SES is more salient than being non-white. Based on the available evidence, physicians, and nurses manifest implicit biases to a similar degree as the general population. Biases also exist for age, mental illness, weight, having AIDS, brain injured patients perceived to have contributed to their injury, intravenous drug users and disability. |
| 18<br>19<br>20<br>21<br>22<br>23<br>24<br>25<br>26<br>27                                  | 47<br>Murphy et al 2017<br><br>USA                  | <b>Editorial/Comment</b><br>A discussion about<br>socially at-risk<br>populations in relation to<br>health disparities.                                                                                                                                                                                                                                                                                                | Increasingly, it is<br>recognized that<br>disparities are driven not<br>by differences in biology<br>or individual patient<br>characteristics, but<br>rather by social<br>determinants, or the<br>conditions of the<br>environments in which<br>people live. | <b>Doctor</b><br>Specialism not<br>specified. | Paper discusses<br>socioeconomic position                                                                                                                                                        | <b>NA</b>                                           | Bias manifests itself in behaviours that impede relationship building. Physicians with higher levels of general bias are more likely to talk slowly, have greater verbal dominance, and have less patient-centred dialogue. Implicit bias influences diagnosis, treatment recommendations, questions asked of the patient, and diagnostic tests ordered.                                                                                                                                             |
| 28<br>29<br>30<br>31<br>32<br>33<br>34<br>35<br>36<br>37<br>38<br>39<br>40<br>41<br>42    | 48<br>Pettit et al 2017<br><br>USA                  | <b>Research Paper</b><br>High-fidelity simulation -<br>randomly assigned to<br>participate in a simulation<br>of acute coronary<br>syndrome.<br>Students were blinded to<br>study objectives.<br>quantitative data were<br>obtained on the number<br>of times students<br>performed the following<br>patient actions:<br>acknowledged patient by<br>name, asked about pain,<br>conversed, and touching<br>the patient. | To test the effect of<br>socioeconomic status<br>bias on Medical Student-<br>Patient interactions using<br>an Emergency Medicine<br>Simulation.                                                                                                              | <b>Medical<br/>Students</b>                   | Mannequin - low SES depicted<br>by a homeless person - dirt<br>covered t-shirt and trousers.<br>Mannequin - High SES<br>depicted by executive dress -<br>button down collar suit and tie<br>etc. | <b>Yes</b>                                          | Data demonstrate that Medical Students were more likely to ask the simulated patient with high SES about pain control (p = 0.04) and more likely to touch the low SES patient (p = 0.01). Paper discusses touch as a mechanism to communicate compassion - put could also be a display of power. Decision-making does not appear to be different - patient received aspirin and was sent for a cardiac catheterization in both groups.                                                               |



|    | Author(s)<br>date<br>Country       | Type of Publication<br>Research design/method<br>(If applicable)                                                                                                                                                                                 | Aim(s)<br>(If stated)                                                                                                                                             | Population<br>Professional<br>Specialty                           | Concept<br>SES Measure                                                                                                                                                           | Context<br>Link HP<br>Bias &<br>Decision-<br>making | Key results, findings, or information                                                                                                                                                                                                                                                                                              |
|----|------------------------------------|--------------------------------------------------------------------------------------------------------------------------------------------------------------------------------------------------------------------------------------------------|-------------------------------------------------------------------------------------------------------------------------------------------------------------------|-------------------------------------------------------------------|----------------------------------------------------------------------------------------------------------------------------------------------------------------------------------|-----------------------------------------------------|------------------------------------------------------------------------------------------------------------------------------------------------------------------------------------------------------------------------------------------------------------------------------------------------------------------------------------|
| 49 | Goddu et al 2018<br><br>USA        | <b>Research Paper</b><br>Randomized vignette study of two chart notes employing stigmatizing versus neutral language to describe the same hypothetical patient, a 28-year-old man with sickle cell disease.                                      | To assess if words matter... to assess if Stigmatizing Language aids in the transmission of Bias in the medical record                                            | <b>Medical Students</b>                                           | Vignette language portraying the patient negatively with irrelevant or unnecessary indicators of lower socioeconomic status such as hanging out with friends outside McDonald's. | <b>Yes</b>                                          | Language may play a powerful role in influencing clinician attitudes and behaviour. Less aggressive pain management employed with the hypothetical patient who had low SES.                                                                                                                                                        |
| 50 | Brandao et al 2019<br><br>Portugal | <b>Research Paper</b><br>Two experimental Vignette studies                                                                                                                                                                                       | To investigate classism in pain care and the role of patient socioeconomic status on nurse's pain assessment and management practices                             | <b>Nurse Pain</b>                                                 | SES was manipulated by level of education and occupational activity                                                                                                              | <b>Yes</b>                                          | Overall, the higher-SES patient was perceived as having more intense pain than the lower-SES patients. The low-SES patient's pain was perceived as less credible than the high-SES patient's pain when distress cues were present. Patient SES influenced some of the nurses' pain assessments but not their management practices. |
| 51 | Gonzales et al 2019<br><br>USA     | <b>Research Paper</b><br>A telephone interviews incorporating Logistic regression models that assessed associations between race/ethnicity/education, medical discrimination, clinician mistrust, and treatment decision-making with concordance | To assess the associations between race/ethnicity/education, medical discrimination, clinician mistrust, and treatment decision-making and guideline concordance. | <b>Doctors Cancer</b>                                             | Education level                                                                                                                                                                  | <b>Yes</b>                                          | Intersectionality. Socioeconomic factors influenced guidelines concordance. They found educational disparities in breast cancer treatment. Non-college-educated Black women had lower odds of guideline-concordant care vs. college-educated White women.                                                                          |
| 52 | Hirsh et al 2019<br><br>USA        | <b>Research Paper</b><br>Vignette style study. A randomized controlled trial.                                                                                                                                                                    | To test a virtual perspective-taking intervention to reduce race and SES disparities in pain care                                                                 | <b>Doctors Pain</b>                                               | SES was represented visually by work attire: low SES patients - fast food uniform, and high SES - a business suit.                                                               | <b>Yes</b>                                          | Statistically reliable treatment bias during the pain treatment decision-making pre-intervention. Forty seven percent of providers who were biased at baseline did not show a statistically reliable treatment bias one week later.                                                                                                |
| 53 | Vlietstra et al 2020<br><br>UK     | <b>Research Paper</b><br>Vignette - participants randomised to one of two video vignettes. Representing a psychological assessment session with either a 'lower' or 'upper' class client.                                                        | To assess for SES variations in clinical reasoning, namely diagnosis, risk assessment and treatment, and to measure class self-awareness.                         | <b>Psychological therapeutic professionals Working in the NHS</b> | Class<br><br>The accent and dress of the client were varied to elicit class stereotypes.                                                                                         | <b>No</b>                                           | There was little difference in clinical reasoning between the two class conditions. The paper acknowledges that the dress variations did not portray class cues accurately or strongly enough to evoke a difference.                                                                                                               |

|    | Author(s)<br>date<br>Country                                      | Type of Publication<br>Research design/method<br>(If applicable)                                                                                                                                                                  | Aim(s)<br>(If stated)                                                                                                                                                                                                                      | Population<br>Professional<br>Specialty    | Concept<br>SES Measure                                                                                                                                                   | Context<br>Link HP<br>Bias &<br>Decision-<br>making | Key results, findings, or information                                                                                                                                                                                                                                                                                                                   |
|----|-------------------------------------------------------------------|-----------------------------------------------------------------------------------------------------------------------------------------------------------------------------------------------------------------------------------|--------------------------------------------------------------------------------------------------------------------------------------------------------------------------------------------------------------------------------------------|--------------------------------------------|--------------------------------------------------------------------------------------------------------------------------------------------------------------------------|-----------------------------------------------------|---------------------------------------------------------------------------------------------------------------------------------------------------------------------------------------------------------------------------------------------------------------------------------------------------------------------------------------------------------|
| 54 | Anastas et al 2020<br><br>USA                                     | <b>Research Paper</b><br>Vignette - 12 computer-simulated patients with chronic back pain that varied by race and SES (low/high). IAT also employed.                                                                              | To assess provider attitudes on Chronic Pain Care Decisions.                                                                                                                                                                               | <b>Doctor</b><br>pain                      | SES was indicated by occupation and depicted by clothing.                                                                                                                | <b>Yes</b>                                          | Strong implicit preference for high SES over low SES individuals. There were significant race × SES interaction effects on provider ratings of pain interference, distress, and workplace accommodations.                                                                                                                                               |
| 55 | Bynum 2020<br><br>USA                                             | <b>Research Paper</b><br>Four doctors from two Community Health Centres convenient sample because they offer services to uninsured people                                                                                         | To assess the doctor's (Asthma Management) perceptions of uninsured patients.                                                                                                                                                              | <b>Doctors</b><br>primary care             | Uninsured                                                                                                                                                                | <b>Yes</b>                                          | 3 out of the 4 Doctors indicated that low SES patients have issues with medication compliance. All the participants indicated that access to affordable medication due to patients' SES was a barrier. Paper states that it might be possible to improve physicians' decision-making through techniques that minimize biases.                           |
| 56 | Crandlemire 2020<br><br>Canada                                    | <b>Editorial/Comment</b><br>A discussion about the literature regarding healthcare disparities for people with low SES and the role of unconscious biases held among healthcare providers.                                        | Unconscious Bias in Nursing is more likely activated and more prevalent during high pressure or time sensitive scenarios, when people are busy and tired, or when decisions need to be made and there is missing or ambiguous information. | <b>Nurses</b><br>Specialism not specified. | SES                                                                                                                                                                      | <b>NA</b>                                           | Decision-making is influenced by both positive and negative attitudes toward people due to unconscious or conscious biases held by healthcare providers which can affect patient care outcomes.                                                                                                                                                         |
| 57 | Diniz et al 2020<br><br>International<br>(different<br>countries) | <b>Research Paper</b><br>A Mixed methods study. Video vignette: Two women, each doing two different pain-inducing movements. After watching the vignette nurses were asked to:<br>1. Associate five characteristics to the women. | Examined how nurses' perceptions of pain patients' SES were associated with (more or less) dehumanizing inferences about their pain and different treatment recommendations.                                                               | <b>Nurses</b><br>Pain                      | The video vignette women SES was determined using the MacArthur Scale of Subjective Social Status (based on appearance). Low and middle SES women chosen for the videos. | <b>Yes</b>                                          | Words associated with the middle SES women were - calm, friendly, informed, anxious, sociable. Words associated with the lower SES women were - withdrawn, tough, passive, hardworking, worried, poorly informed. Treatment decisions are similar except the low SES patient is referred to psychoeducation- because of a perceived lack of competence. |

| Author(s)<br>date<br>Country   | Type of Publication<br>Research design/method<br>(If applicable)                                                                                                                                                                                                                                   | Aim(s)<br>(If stated)                                                                                                                                                                                      | Population<br>Professional<br>Specialty    | Concept<br>SES Measure                                                          | Context<br>Link HP<br>Bias &<br>Decision-<br>making | Key results, findings, or information                                                                                                                                                                                                                                                                              |
|--------------------------------|----------------------------------------------------------------------------------------------------------------------------------------------------------------------------------------------------------------------------------------------------------------------------------------------------|------------------------------------------------------------------------------------------------------------------------------------------------------------------------------------------------------------|--------------------------------------------|---------------------------------------------------------------------------------|-----------------------------------------------------|--------------------------------------------------------------------------------------------------------------------------------------------------------------------------------------------------------------------------------------------------------------------------------------------------------------------|
|                                | 2. write a brief story to describe 'the woman's pain and how it affects life recommending a treatment.                                                                                                                                                                                             |                                                                                                                                                                                                            |                                            |                                                                                 |                                                     |                                                                                                                                                                                                                                                                                                                    |
| 58<br>Veesart et al 2020<br>US | <b>Editorial/Comment</b><br>A discussion about unconscious bias and how it might impact on nursing care.                                                                                                                                                                                           | Everyone has a cultural lens through which we view the world, which can sometimes create biases. Often, the decisions we make are directly influenced by those biases, even when we espouse other beliefs. | <b>Nurses</b><br>Specialism not specified. | SES                                                                             | <b>NA</b>                                           | Making decisions based on prejudices can have devastating impacts on nursing care. The first step in addressing this is self-awareness. Bias decisions often occur under stressful situations                                                                                                                      |
| 59<br>Beyer et al 2021<br>UK   | <b>Systematic review</b><br>Included works published between January 2004 and April 2020. PubMed, Embase and Cochrane Central databases                                                                                                                                                            | To assess the current evidence for factors that influence treatment decision-making in localized kidney Cancer                                                                                             | <b>Multi-Professional</b><br>cancer        | socio economic status and education status - as reported in the primary papers. | <b>Yes</b>                                          | Education status, socioeconomic status, a family history of cancer, and cancer anxiety can be barriers to treatment decisions in kidney cancer. SES and economic variables were identified as barriers to treatment decisions.                                                                                     |
| 60<br>Chase 2021<br>USA        | <b>Editorial/Comment</b><br>A discussion regarding health disparities research and the negative stereotypes and attitudes that providers can hold toward certain patient groups.                                                                                                                   | Biased interactions with providers are a dynamic two-way process that can influence patients' satisfaction and trust in the health care provider. Leading to impairments in the patient's health outcomes. | <b>Multi-professional</b><br>Cancer        | SES                                                                             | <b>NA</b>                                           | Advantageous and standard-of-care treatments may not be recommended to certain patients because physicians believe that those patients may not adhere to them. When faced with limited time to adequately assess the patient's problem, physicians may rely on their implicit stereotypes to make hasty decisions. |
| 61<br>Khidir et al 2021<br>USA | <b>Research Paper</b><br>Cross-sectional analysis of a sample taken from 100% of Medicare claims for emergency department (ED) visits. ED visits from January 1, 2016, through December 31, 2019. Decision about admission or discharge were analysed according to race, Medicaid, and low income. | To estimate the consistency of ED physician admission propensities across categories of patient sex, race and ethnicity, and Medicaid enrolment.                                                           | <b>Doctors</b><br>Emergency care           | insurance status - low income.                                                  | <b>No</b>                                           | Doctors who are more or less likely to admit patients from the ED are more or less likely to do so regardless of SES.<br><br>No evidence of SES bias and decision-making about admission established.                                                                                                              |

|    | Author(s)<br>date<br>Country     | Type of Publication<br>Research design/method<br>(If applicable)                                                                                                                                                                                                                      | Aim(s)<br>(If stated)                                                                                                                                                                                           | Population<br>Professional<br>Specialty       | Concept<br>SES Measure                                                                                                         | Context<br>Link HP<br>Bias &<br>Decision-<br>making | Key results, findings, or information                                                                                                                                                                                                                                                                                                                                                                                                                                             |
|----|----------------------------------|---------------------------------------------------------------------------------------------------------------------------------------------------------------------------------------------------------------------------------------------------------------------------------------|-----------------------------------------------------------------------------------------------------------------------------------------------------------------------------------------------------------------|-----------------------------------------------|--------------------------------------------------------------------------------------------------------------------------------|-----------------------------------------------------|-----------------------------------------------------------------------------------------------------------------------------------------------------------------------------------------------------------------------------------------------------------------------------------------------------------------------------------------------------------------------------------------------------------------------------------------------------------------------------------|
| 62 | Manzer et al 2021<br>USA         | <b>Research Paper</b><br>Qualitative Interviews                                                                                                                                                                                                                                       | To assess bias through the case of contraception.                                                                                                                                                               | <b>Multi-professional</b><br>Family Planning. | SES and Class                                                                                                                  | <b>Yes</b>                                          | Participants link pregnancy risk to women of low SES. Differences in contraception advice found. HPs more likely to steer patients of low SES toward long-acting contraception - can last 1 year or more, rather than prioritizing patients' preferences. HP Bias decision-making may be exacerbated by the fast-paced, high-stress environments and lack of time.                                                                                                                |
| 63 | Agerstrom et al 2021<br>Sweden   | <b>Research Paper</b><br>A retrospective multiple regression analysis study. Data extracted from Swedish LISA database                                                                                                                                                                | To examine SES disparities in In Hospital Cardiac Arrest (IHCA) treatment and survival. Assessing SES at the patient level and controlling other variables to assess impact of SES.                             | <b>Multi-professional</b><br>Cardiac Care     | SES proxy used highest level of completed education and annual income.                                                         | <b>Yes</b>                                          | Patients with lower SES, low income and low education were all significantly associated with more delay, and lower levels of immediate and long-term survival.<br><br>People with high SES are more likely to have their heart rhythm monitored prior to the IHCA, despite having better health (less comorbidity).<br><br>Heart Rhythm monitoring was significantly associated with less delay and increased immediate survival and 30-day survival.                             |
| 64 | Bernardes et al 2021<br>Portugal | <b>Research Paper</b><br>Vignette: Drawing on a social psychological model of dehumanization. Two online experimental studies were conducted. vignettes/images depicting 2 cases of women with chronic low-back pain, followed by videos of them performing a pain-inducing movement. | To test the effect of patient socioeconomic status on pain assessment and management. Also, whether patient dehumanization and perceived life hardship mediated these effects.                                  | <b>Nurses and Medical Students</b><br>Pain    | SES was manipulated: level of education (incomplete high school education Vs degree) and occupation (factory worker Vs Judge). | <b>Yes</b>                                          | Medical students: pain assessment was less comprehensive for low SES. They rated the low SES patient as having slightly lower pain intensity during movement but perceived her as more credible and with higher pain-related disability.<br>Nurses: pain assessment was less comprehensive for higher SES. Nurses reported being slightly more willing to offer individualized care to the low SES patient. Lower SES patients were perceived as being more disabled by the pain. |
| 65 | Kirkham et al 2022<br>UK         | <b>Editorial/Comment</b><br>A discussion about the Department of Health funded evaluation of the MIDIRS about Informed Choice leaflet. Stereotyping can be a defence mechanism which assisted midwives in coping with the pressures of work.                                          | Midwives sometimes misjudged women's ability and willingness to participate in their maternity care and, therefore, women can be negatively labelled about things like housing tenure or social class [or age]. | <b>Midwives</b><br>Maternity                  | Social class discussed                                                                                                         | <b>NA</b>                                           | SES stereotyping judgements affect Midwives behaviour. Low SES Women's silence reinforced the staff's perception that 'they don't want information.' It may also enable busy clinics to move at an 'efficient' and 'reasonable' pace.                                                                                                                                                                                                                                             |

|                                                                                                                                                                                  | Author(s)<br>date<br>Country         | Type of Publication<br>Research design/method<br>(If applicable)                                                                                                                       | Aim(s)<br>(If stated)                                                                                                                                                                                                                                                        | Population<br>Professional<br>Specialty   | Concept<br>SES Measure                                                                | Context<br>Link HP<br>Bias &<br>Decision-<br>making | Key results, findings, or information                                                                                                  |
|----------------------------------------------------------------------------------------------------------------------------------------------------------------------------------|--------------------------------------|----------------------------------------------------------------------------------------------------------------------------------------------------------------------------------------|------------------------------------------------------------------------------------------------------------------------------------------------------------------------------------------------------------------------------------------------------------------------------|-------------------------------------------|---------------------------------------------------------------------------------------|-----------------------------------------------------|----------------------------------------------------------------------------------------------------------------------------------------|
| 1<br>2<br>3<br>4<br>5<br>6<br>7<br>8<br>9<br>10<br>11<br>12<br>13<br>14<br>15<br>16                                                                                              | 66<br>Bruno et al 2022<br><br>Canada | <b>Research Paper</b><br>Prospective cross-sectional study from five primary care practices. A randomized controlled trial of a diabetes goal setting and shared decision-making plan. | To assess if SES is associated with empathic communication and decision quality in Diabetes Care.                                                                                                                                                                            | <b>Multi-professional</b><br>Diabetes     | Patient self-reported their ethnicity, education level and income prior to the trial. | <b>No</b>                                           | Shared decision-making was not impacted by low education or income.                                                                    |
| 17<br>18<br>19<br>20<br>21<br>22<br>23<br>24<br>25<br>26<br>27<br>28<br>29<br>30<br>31<br>32<br>33<br>34<br>35<br>36<br>37<br>38<br>39<br>40<br>41<br>42<br>43<br>44<br>45<br>46 | 67<br>Torres et al 2022<br><br>USA   | <b>Review</b><br>Literature review                                                                                                                                                     | To assess implicit biases among healthcare providers, the influence of implicit biases on providers' medical judgments and communication, and the mechanisms by which this impaired patient-physician communication affects patients' health outcomes and disease prognoses. | <b>Doctors</b><br>Gynaecology<br>Oncology | Paper discusses SES                                                                   | <b>NA</b>                                           | SES and insurance status impacts on unequal care and quality of care.<br><br>SES associated with non-adherence to clinical guidelines. |

# BMJ Open

## Health Professionals implicit bias of patients with low socioeconomic status (SES) and its effects on clinical decision-making: A Scoping Review

|                                 |                                                                                                                                                                                                                                                                                                   |
|---------------------------------|---------------------------------------------------------------------------------------------------------------------------------------------------------------------------------------------------------------------------------------------------------------------------------------------------|
| Journal:                        | <i>BMJ Open</i>                                                                                                                                                                                                                                                                                   |
| Manuscript ID                   | bmjopen-2023-081723.R1                                                                                                                                                                                                                                                                            |
| Article Type:                   | Original research                                                                                                                                                                                                                                                                                 |
| Date Submitted by the Author:   | 18-Apr-2024                                                                                                                                                                                                                                                                                       |
| Complete List of Authors:       | Job, Claire; Cardiff University; Cardiff University<br>Adenipekun, Bami; Cardiff University<br>Cleves, Ann; Cardiff University<br>Gill, Paul; Northumbria University, Department of Nursing, Midwifery and Health<br>Samuriwo, Ray; Edinburgh Napier University, School of Health and Social Care |
| <b>Primary Subject Heading</b>: | Public health                                                                                                                                                                                                                                                                                     |
| Secondary Subject Heading:      | Sociology                                                                                                                                                                                                                                                                                         |
| Keywords:                       | Clinical Decision-Making, Health Equity, Stereotyping, Systematic Review                                                                                                                                                                                                                          |
|                                 |                                                                                                                                                                                                                                                                                                   |

SCHOLARONE™  
Manuscripts



I, the Submitting Author has the right to grant and does grant on behalf of all authors of the Work (as defined in the below author licence), an exclusive licence and/or a non-exclusive licence for contributions from authors who are: i) UK Crown employees; ii) where BMJ has agreed a CC-BY licence shall apply, and/or iii) in accordance with the terms applicable for US Federal Government officers or employees acting as part of their official duties; on a worldwide, perpetual, irrevocable, royalty-free basis to BMJ Publishing Group Ltd ("BMJ") its licensees and where the relevant Journal is co-owned by BMJ to the co-owners of the Journal, to publish the Work in this journal and any other BMJ products and to exploit all rights, as set out in our [licence](#).

The Submitting Author accepts and understands that any supply made under these terms is made by BMJ to the Submitting Author unless you are acting as an employee on behalf of your employer or a postgraduate student of an affiliated institution which is paying any applicable article publishing charge ("APC") for Open Access articles. Where the Submitting Author wishes to make the Work available on an Open Access basis (and intends to pay the relevant APC), the terms of reuse of such Open Access shall be governed by a Creative Commons licence – details of these licences and which [Creative Commons](#) licence will apply to this Work are set out in our licence referred to above.

Other than as permitted in any relevant BMJ Author's Self Archiving Policies, I confirm this Work has not been accepted for publication elsewhere, is not being considered for publication elsewhere and does not duplicate material already published. I confirm all authors consent to publication of this Work and authorise the granting of this licence.

# Health Professionals implicit bias of patients with low socioeconomic status (SES) and its effects on clinical decision-making: A Scoping Review

Claire Job<sup>1\*</sup>, Bami Adenipekun<sup>2</sup>, Anne Cleves<sup>3</sup>, Paul Gill<sup>4</sup>, Ray Samuriwo<sup>5</sup>

## Claire Job

<sup>1\*</sup>School of Healthcare Sciences, Cardiff University; Cardiff, United Kingdom

## Bami Adenipekun

<sup>2</sup>Patient and Public Involvement Representative

## Anne Cleves

<sup>3</sup>Velindre University NHS Trust Library, Cardiff University Information Services. Velindre Cancer Centre Cardiff, United Kingdom

## Paul Gill

<sup>4</sup>Department of Nursing, Midwifery and Health, Northumbria University, Newcastle, United Kingdom.

## Ray Samuriwo

<sup>5</sup>School of Health and Social Care. Edinburgh Napier University, Edinburgh, United Kingdom

## Corresponding Author:

\*Claire Job, School of Healthcare Sciences, Cardiff University, United Kingdom

Email: [jobc@cardiff.ac.uk](mailto:jobc@cardiff.ac.uk)

**Word Count: 9,023 words** excluding abstract, tables, figures, references.



## Abstract

### Objectives

Research indicates that people with lower socioeconomic status (SES) receive inferior healthcare and experience poorer health outcomes compared to those with higher SES, in part due to Health professional (HP) bias. We conducted a scoping review of the impact of HP bias about SES on clinical decision-making and its effect on the care of adults with lower SES.

### Design

JBI scoping review methods were used to perform a systematic comprehensive search for literature. The scoping review protocol has been published in BMJ Open.

### Data Sources

Medline, Embase, ASSIA, Scopus and CINAHL were searched, from the first available start date of the individual database through to March 2023. Two independent reviewers filtered and screened papers.

### Eligibility Criteria

Studies of all designs were included in this review to provide a comprehensive map of the existing evidence of the impact of HP bias of SES on clinical decision-making and its effect on the care for people with lower SES.

### Data extraction and Synthesis

Data were gathered using an adapted JBI data extraction tool for systematic scoping reviews.

### Results

Sixty-seven papers were included from 1975-2023. Thirty-five (73%) of included primary research studies reported an association between HP SES bias and decision-making. Thirteen (27%) of the included primary research studies did not find an association between HP SES bias and decision-making. Stereotyping and bias can adversely affect decision-making when the HP is fatigued or has high cognitive load. There is evidence of intersectionality which can have a powerful cumulative effect on HP assessment and subsequent decision-making. HP implicit bias may be mitigated through the assertiveness of the patient with low SES.

### Conclusion

HP decision-making is at times influenced by non-medical factors for people of low SES, and assumptions are made based on implicit bias and stereotyping, which compound or exacerbate health inequalities. Research that focuses on decision-making when the HP has high cognitive load, would help the health community to better understand this potential influence.

## Key Words

Socioeconomic Status, Implicit Bias, Unconscious Bias, Socioeconomic Disparities, Healthcare Disparities, Clinical Decision-making, Healthcare Professionals, Scoping Review.

## Article Summary

### Strengths and limitations

- This scoping review has a previously published protocol and has been conducted in line with international standards for best practice, to ensure rigor and transparency.
- The inclusion of a patient and public interest representative in the research team added quality to this review, by ensuring that the review is relevant, meaningful, and informed by the perspective of the people that access and utilise healthcare services.
- This work summarises the body of evidence in a clear concise manner, which highlights the patterns, advances, and gaps in what is known about this topic as well as the priorities for future research.
- Due to the nature of funding, only studies published in English were included and therefore this scoping review may have excluded relevant literature published in other languages.
- In keeping with the nature of a scoping review, the quality of literature collected was not evaluated.

## Introduction

Socioeconomic status (SES), a social determinant of health, is a key causative and contributory factor to disparities and inequities in morbidity as well as mortality in many nations<sup>(1-3)</sup>. There is a wide range of robust empirical evidence from many settings which indicates that people with lower SES tend to have a shorter life expectancy and worse health related outcomes in comparison to more affluent people<sup>(1-4)</sup>. People with higher socioeconomic status (SES) have better life chances, and thrive more than those in other socioeconomic groups<sup>(5-7)</sup>. The causes of the social gradient in health are complex, and the exact nature of the relationship is difficult to establish, because it is informed by both individual factors such as health behaviour but also factors associated with economic wealth<sup>(8-9)</sup>. The gradient in health and SES is also subject to a person's power, prestige, and the social connections they enhance<sup>(5)</sup>. Therefore, SES related healthcare disparities are influenced by how a person's SES is perceived by themselves and others<sup>(5,6)</sup>.

There is evidence that suggests the care people receive is subject to Health Professionals (HPs) implicit bias arising from perceptions of patients with low SES<sup>(10)</sup>. Every person's thinking is shaped by lived experiences; interacting with people whose lived experience more closely reflects our own can lead people to using a favourable bias; just as unfavourable bias can be attributed to people whose life experience differs from one's own<sup>(11,12)</sup>. These biases are often subconscious or implicit and manifest in unthinking actions or ill-considered behaviours<sup>(11-15)</sup>. HPs are susceptible to multiple implicit biases relating to different characteristics such as SES, gender, weight, age, and ethnicity in their decision-making<sup>(11,12,16)</sup>. Implicit biases affect HPs decision-making about different aspects of patient care, such as diagnosis and treatment, often with deleterious consequences for the healthcare of that are minoritised, marginalised or othered<sup>(17)</sup>. HPs and patients hold implicit biases alike, which hinder the formation of a therapeutic healthcare relationship, patient experience, clinical decision-making, and care quality<sup>(9)</sup>.

## Operational Definitions

It is important to define key concepts at the onset of this work so that there is clarity about their use in this scoping review. Our operational definitions are summarised in figure 1 and are set out in detail with their underpinning rationale in our protocol for this scoping review<sup>(13)</sup>.

## Socioeconomic Status

SES is complex and challenging to define. Internationally, typically countries measure SES using Multiple Indices of Deprivation (sometimes called Multidimensions of Deprivation), which include economic factors such as income but also factors such as education, physical environment (sometimes known as neighbourhood quality), and health<sup>(13,18)</sup>. Papers will be included in this scoping review when the connection between SES of the patient (or one of its discrete measures, e.g., income, unemployment, education) and HP decisions is explored. There are some limitations to the use of discrete measures like income as proxies for SES, but it is prudent to include papers which include proxy measures of SES, as this is more likely to reflect the way healthcare professionals make decisions, as they encounter people in their practice<sup>(13,19)</sup>. In other words, we assert that healthcare professionals are more likely to use discrete measures of SES, rather than more robust empirical measures to inform their perceptions of patients in everyday practice<sup>(17)</sup>. Therefore, we contend that it is apposite to include papers with discrete measures that may be limited in their utility as proxy measures of SES in this scoping review, because they offer useful insights into factors relating to healthcare implicit SES related bias(es) and how they affect HPs decision making about different facets of patient care in the reality of everyday practice.

## HP Biases and Patient Care

Several systematic and scoping reviews<sup>(12,16,20)</sup> have explored the impact of HPs cognitive and other biases on patient care. However, only two of these systematic reviews<sup>(16,20)</sup> have focused specifically on the HP implicit bias and its impact on clinical decision making as well as the consequences for the quality, safety, equity, and appropriateness of patient care.

FitzGerald and Hurst's systematic review<sup>(16)</sup> explored HPs implicit biases relating to race/ethnicity, age, gender and SES, and indicate that biases are likely to influence diagnosis, treatment decisions and levels of patient care. Fitzgerald and Hurst's review<sup>(16)</sup> discusses evidence that social class may invoke more salient bias than bias associated with other characteristics such as race. Beyer<sup>(20)</sup> explored factors that influence treatment decisions in localised kidney cancer and found that education and socioeconomic status, were identified as barriers to HP making equitable treatment decisions.

Willems et al.'s systematic review<sup>(12)</sup> focuses on the impact of SES on doctor-patient communication, however this review does not consider decision making. Willems et al<sup>(12)</sup> found that patients with lower SES had a less positive dialogue with their doctor, characterised by lower levels of information giving, less interactive discourse and a lower level of doctor advice/instruction.

## Bias and Decision Making

Biases can be explicit, implicit, favourable, or unfavourable, but regardless of form, it is an impediment to judging others fairly, which undermines safe, just, and equitable healthcare<sup>(11,16,21-23)</sup>. Explicit bias occurs when the individual has conscious thoughts, beliefs, and awareness that they evaluate people differently based on their characteristics, these evaluations consciously influence their behaviours and decision making<sup>(8,9,11,24)</sup>. In contrast, implicit bias is subconscious, and the individual is unaware of its influence on how they affect, cognition, behaviours, and decision-making<sup>(24,25,26)</sup>. Consequently, there is a more deliberate, volitive, and intentional process to decision-making when explicit bias is at play in contrast to the tacit, covert, unintentional nature of the relationship between implicit bias and decision-making<sup>(11,16,23)</sup>.

Implicit and explicit bias are kindred but independent constructs which raises some methodological challenges and considerations with regards to their measurement<sup>(13,21)</sup>. Explicit bias relates to thinking that people are aware of and so can be measured through self-report, but there is the risk of people providing socially desirable responses<sup>(21)</sup>. The subliminal nature of implicit bias requires a different approach to surface and measure it given its multifaceted impact on a person's affect, cognition and behaviour<sup>(21)</sup>. The Implicit Association Test (IAT) is the most established way of measuring implicit bias and has strong psychometric properties in comparison to other implicit measures<sup>(21,27-30)</sup>. Therefore, it is important to briefly consider its strengths and limitations.

## Implicit Association Test

The (IAT) is a validated measure of implicit bias and with strong psychometric properties in comparison to other tools<sup>(30,31)</sup>. A consensus exists among researchers with regards to the IAT's lacks of a high test-retest reliability in the same individual<sup>(16)</sup>. However, the construct validity of the IAT, as well as its efficacy as a measure of implicit bias, especially as a predictor of real-life behaviour in the context of everyday life is contested<sup>(16,21,30,32)</sup>. Concerns relating to the predictive validity of the IAT persist among some researchers, progenitors cautioning against its use to forecast what people will do, or not do, and behave as they go about their lives, given the vicissitudes of human existence with their concomitant, contingent events that intersect in complex, unexpected, emergent ways to impact on an individual's affect, actions and behaviour<sup>(16,30)</sup>. Conversely, others<sup>(30,32)</sup> maintain that implicit and explicit measures of bias are not superfluous but have their merits in informing predictions about human behaviour in different ways that are distinct from each other. Despite this lively debate about the relative merits of IAT, it is most widely utilised measure of implicit race and ethnicity bias in healthcare<sup>(16,31,33)</sup>. One view is that there is

specious evidence of the predictive validity of the IAT with regards to implicit racial bias<sup>(30,34)</sup>. This characterisation of the IAT's utility in establishing implicit racial bias is strongly disputed by many others<sup>(30,35,36)</sup>, who have a different understanding and conclusions predicated on the same data set. There is also evidence from a systematic review<sup>(37)</sup>, which highlights the limitations of the IAT in establishing multiplicative effect of several biases that intersect across multiple social identities.

## Our approach

A better understanding of the impact SES has on HP patient related decision-makings arguably will provide a valuable new focus in tackling socio-economic health inequalities<sup>(8,9,12)</sup>. Therefore, it is imperative to undertake a scoping review that maps all pertinent evidence, integrates contemporary knowledge about this topic, clarifies key concepts, sets out evidence-based recommendations for practice and identifies the priorities for future research. In our view, it is essential that the scoping review should map all available research on implicit SES related bias regardless of the research method used. Several scoping reviews<sup>(24,33,38)</sup> have highlighted the valuable insights into implicit bias and its impact on HPs decision-making that can be gained from studies that use other research methods such as case study vignettes, questionnaires, think aloud interviews, randomised controlled trials and qualitative methods. This evidence from other scoping reviews underscores the aptness of our decision to include all studies that met our inclusion criteria as stated in detail in our a-priori protocol<sup>(13)</sup>, regardless of the methodological approach used. Debates about methodological rigour in relation to implicit bias should not be an impediment to use every means to better understand and address its pernicious impact on HPs clinical decision-making, often culminating in inappropriate or discriminatory care that gives rise to adverse event, causes harm, offence and negatively impact people's healthcare related outcomes. In sum, any scoping review that considers implicit bias in healthcare has an obligation to include all studies so the best possible relevant research evidence to inform and underpin the consistent delivery of safe high-quality, just, and equitable healthcare.

## Aim

We sought to scope the reported impact of HP bias about SES on clinical decision-making and its effect on the care for people with lower SES in the wider literature. Our aim in this scoping review was to answer three related research questions:

- RQ1: What has been published about implicit SES bias and HP attitudes or behaviours when deciding and providing care?
- RQ2: How does SES effect the dynamics of the HP and patient relationship?
- RQ3: What recommendations for practice have been postulated, implemented, or evaluated to address HP implicit bias related to SES?

## Method

We conducted a scoping review using JBI methodology<sup>(39,40)</sup> as set out in our a-priori published protocol<sup>(13)</sup>, and report our results in line with the Preferred Reporting Items for Systematic Reviews and Meta-Analyses for Protocols and Scoping Reviews (PRISMA-ScR) guidelines<sup>(41,42)</sup>. A detailed account of methods used in this scoping review is provided in our a-priori published protocol<sup>(13)</sup>, which has granular details about key elements such as the search strategy, inclusion/exclusion criteria which can be replicated. Therefore, we present a concise summary of the conduct of this scoping review in line with best practice reporting to avoid undue repetition.

## Patient, Public Involvement

This scoping review [and it's previously published protocol] has been developed with a member of the public (BA). The design of this scoping review draws upon BA's personal experience of living with, and beyond a cancer diagnosis,

which entails regular contact with health services and healthcare professionals. Therefore, BA's lived experience and perspective has directly shaped the design, results, discussion and implication sections of this work.

### Search strategy and data sources

Our literature search was carried out in three stages. In the first stage, an initial search was undertaken on Medline to identify and refine search terminology and consider Medical Subject Headings to ensure a comprehensive strategy that selected all the relevant papers published related to SES and its impact on health care. The Medline search strategy was tested, and the first 100 references scanned by three authors (AC, CJ, and RS) to ensure relevant papers were retrieved. Key papers were checked to confirm they were being retrieved by the search. In the second stage of the search process, the Medline search strategy was adapted for use on other key databases (Medline, Embase, ASSIA, Scopus, CINAHL) [see table 1] to account for differences in controlled vocabulary and database functionality. We also searched the website of key organisations such as professional regulatory bodies, think tanks and policy making bodies for any pertinent publications. In the final stage of the literature search, we conducted back and forward chaining of included papers to identify any other relevant documents. All searches have been updated since the initial search date, of 21<sup>st</sup> October 2021 and are up to date as of 9<sup>th</sup> March 2023. Please see Supplementary Materials 1 for the detailed search strategy.

Table 1: Table of Databases searched.

|                                                                                                                         |                                           |
|-------------------------------------------------------------------------------------------------------------------------|-------------------------------------------|
| <b>Date Restriction:</b> None                                                                                           | <b>Language Restriction:</b> English only |
| *The start date varies in each of the databases because these are the first available offered by each of the databases. |                                           |
| <b>Database name</b>                                                                                                    | <b>Dates Covered* Up to March 9 2023</b>  |
| Medline (OVID) & Epub & Medline in process (OVID)                                                                       | 1947 – present                            |
| <i>Embase (OVID)</i>                                                                                                    | 1946 – present                            |
| <i>ASSIA (ProQuest)</i>                                                                                                 | inception – present                       |
| <i>Scopus (Elsevier)</i>                                                                                                | 1960 – present                            |
| <i>CINAHL (EBSCO)</i>                                                                                                   | 1976 – present                            |

### Screening and selection process

All retrieved citations were exported to the Rayyan systematic review software package and duplicates removed. In the first filter, the titles, and abstracts of the included papers were assessed against the inclusion criteria and independently filtered by two members of the project team (CJ and RS). Any differences with regards to the inclusion or exclusion, were resolved through discussion and after reviewing the full text of the papers in question. In the second filter, the full text papers were assessed against the inclusion and exclusion criteria. Our inclusion criteria are set out in Table 2, as per our protocol<sup>(13)</sup>. We only included publications in English as this was an unfunded study with no facility for translation<sup>(13)</sup>. Studies of all designs were included in this review because our focus was on mapping the evidence about the impact of HP bias of SES on clinical decision-making and its effect on the care for people with lower SES.

Table 2: Identification the Population, Concept and Context and Design

| Population               | Concept                                                                                                                           | Context                                                                                                                                         | Design                                                    |
|--------------------------|-----------------------------------------------------------------------------------------------------------------------------------|-------------------------------------------------------------------------------------------------------------------------------------------------|-----------------------------------------------------------|
| People aged 18+ globally | Socioeconomic Status (SES)                                                                                                        | Health Professional bias or implicit/unconscious bias of SES when it interacts with decision-making.                                            | Research studies of all designs that include primary data |
|                          | Papers that discuss a contributing factor of SES (such as education or income) as defined in the operational definitions.         | Any healthcare setting where a person is assessed, and decisions are made by a Health Professional.                                             | Case studies                                              |
|                          | Please see the detailed search strategy in the supplementary material with the full list of search terms used in relation to SES. | Health professionals include:<br>Doctors<br>Nurses<br>Physiotherapists<br>Occupational therapists<br>Speech and Language therapists<br>Midwives | Editorials                                                |
|                          |                                                                                                                                   |                                                                                                                                                 | Opinion papers                                            |

### Data extraction and charting

Relevant data were gathered using an adapted version of the JBI data extraction tool systematic scoping reviews<sup>(43)</sup>, that was converted to an Access Database form (please see Supplementary Materials 2 for the adapted JBI data extraction form). This Access database form was tested on the first five papers and then adapted as per JBI guidance to gather all information pertinent to the review questions<sup>(43)</sup>. On completion of data extraction, the data was exported to an Excel spreadsheet to facilitate data analysis. Our mapping and reporting of the data was also informed by the lived experience and perspective of the patient and public interest representative on our team (BA) as stated in our protocol<sup>(13)</sup> and consistent with best practice in systematic reviews<sup>44</sup>.

## Results

### Selection of sources of evidence

The PRISMA flow diagram below (Figure 2) summarises how we searched for relevant publications and selected literature for inclusion, in line with best practice in scoping reviews<sup>(45)</sup>. Data analysis, interpretation, and reporting will be underpinned by the PAGER framework<sup>(46)</sup>.

## Summary of characteristics

In our search strategy, we purposively cast a wide net to capture all relevant published papers, because of the complexity of defining SES and in total, we screened 11823 publications across different decades. At first filter, 11281 'off topic' papers were excluded, such as those concerned with children, dentistry, HP career development or focused on SES but not HP decision-making. We selected publications that considered HP decision-making from the HP's viewpoint and excluded papers that explored HP decision-making from the patient perspective.

We reviewed 542 studies for eligibility and retained 67 publications for inclusion in the scoping review. The characteristics of the publications included in this scoping review are presented in a Supplementary Materials 3 called 'Characteristics of Included Publications'. Seventy papers were retained for background reading and synthesis, because they provided broader insights about the relationship(s) between stereotyping, bias, and SES. We included a wide range of publications in this review. Forty-eight of the 67 included papers (72%) reported on original research, while the remaining papers were commentaries or opinion pieces (n=15) and reviews (n=4) about aspects of SES and HP decision-making. Most included papers, were from the United States of America (67%; n= 45), followed by the United Kingdom (10%; n=7), Canada (6%; n=4) and Portugal (3%; n=2). Two papers involved authorship across national boundaries, and these were labelled as international (3%; n=2). The remaining included papers included involved a single published paper from Denmark, Finland, Mexico, New Zealand, Norway, Sweden, and Pakistan.

The earliest published included research paper retained was by Crane<sup>(47)</sup> in 1975, who explored the impact of social factors and physiological criteria in HP treatment decisions about critically ill patients. Crane<sup>(47)</sup> explored doctor decision-making using case histories and questionnaires; she discovered that there were disparities in doctors' decision-making between a patient with a high-status occupation and another patient described as an unemployed labourer. Doctors in this study<sup>(47)</sup> offered more aggressive treatment options to people with high status occupations, even though they explicitly stated that they did not rate social status highly in their decision-making process. Crane<sup>(47)</sup> did not categorise this finding as implicit bias, which may reflect the prevailing socio-cultural beliefs at the time this study was conducted. However, in our view, this finding by Crane<sup>(47)</sup> is an example of implicit bias and the earliest research study we found. We also noted that from 2008 onwards, there was at least one publication about bias in relation to SES that met the inclusion criteria for this review. The increased frequency of publications from 2008 onward maybe a consequence of the emergence of the Fundamental Causes Theory<sup>(3)</sup> and a greater understanding of socioeconomic disparities in English healthcare provision facilitated by the Marmot Review<sup>(1)</sup>.

## Types of publications

The results of this scoping review highlighted various aspects of what has been published about implicit SES bias and HP attitudes or behaviours when deciding and providing care. Firstly, most of the 67 publications included in this scoping review were original research studies (n=48, 72%), with the remainder being reviews, commentaries, and opinion papers (n=19, 28%). This indicates that there has been a greater focus on building the evidence on this topic by focusing on conducting primary research relative to preparing other types of papers which provide useful and complementary insights. An alternative perspective to consider is that publications such as commentaries, opinion papers, and editorials often contain useful tacit insights and wisdom that constitute '*fugitive knowledge*' or '*soft intelligence*' as they exist beyond formal knowledge structures, because this information is risky to know and share with others through conventional mechanisms<sup>(48,49)</sup>. Therefore, these valuable insights are challenging to establish and understand using conventional research approaches. So, they may be scope to encourage the publication of different types of papers on this topic to facilitate a better understanding of how the SES related perceptions, views, or beliefs of a HP impact on their clinical decision-making in a manner that reflects the reality of healthcare which is delivered in complex adaptive systems.



## Geographical location

Many of the papers in this scoping review were authored by people based in the global north, specifically North America and Europe from 1995 onward (n=61, 91%), with the remainder being written by an international team of authors or people based in other parts of the world. This may be an indication of the impact that seminal publications such as the Fundamental Causes Theory<sup>(3)</sup> and Marmot Review<sup>(1)</sup> have had in highlighting the relationship between lower SES, health inequalities and poor health related outcomes in these parts of the world. It is also possible that the higher number of publications in these regions may reflect that there is greater scope to access funding for research on the relationship between implicit SES bias and HP's clinical decision-making within these settings. Then, it would be apt for more multinational research on the relationship between implicit SES bias and HP's clinical decision-making within especially those that are low and middle income, or described as developing and transitional, so there is a better understanding of this issue across nations especially those that are in the global south.

## Health Professionals

Thirty-one<sup>(9,18,19,25,28,47,50-74)</sup> of the forty-eight research papers reported on implicit bias in relation to Doctor/Physician clinical practice. The remaining papers explored or discussed decision-making from a multi-professional viewpoint (n=6)<sup>(75-80)</sup> and this included doctors, nurses or midwives working in multidisciplinary teams. Four research papers<sup>(29,81-83)</sup> explored nurse bias and decision-making, four involved medical students<sup>(27,84-86)</sup> and two papers<sup>(87,88)</sup> explored potential bias and decision-making of Psychotherapists/Counsellors. One study<sup>(89)</sup> was concerned with Occupational Therapists. The implicit bias in nurses and allied health professionals' practice is more evident in recent research studies which may reflect their increasingly central role in clinical healthcare decision-making. We found no studies that explored implicit bias in Pharmacists' decision making. This was a surprise as clinical decision-making is a fundamental aspect of pharmaceutical practice especially in settings such as the UK, where pharmacists have extended roles as non-medical prescribers and must be able to assess, diagnose, and treat patients<sup>(90,91,92,93)</sup>.

## Research Methods

Included primary research papers employed several different methodological approaches. Most research papers (50%, n=24) used a vignette approach<sup>(19,25,27-29,44,47,51,53,54,57,60,64,67,68,71,72,79,82-84,86,88,89)</sup>, and some combined the vignette approach with the Implicit Association Test (n=6)<sup>(27-29,67,68,72)</sup>. Some studies used prospective data collection (n=2)<sup>(29,80)</sup>, High Fidelity simulation (n=1)<sup>(85)</sup>, retrospective data review (n=3)<sup>(62,69,78)</sup> quantitative survey/questionnaire (n=8)<sup>(9,47,56,61,66,68,81,87)</sup>, qualitative interview (n=10)<sup>(52,55,58,63-65,70,75-77)</sup>, or a qualitative observational approach (n=2)<sup>(65,76)</sup>.

Vignette studies illustrated the clinical scenario through a video recording (n=11)<sup>(19,25,44,51,53,64,71,79,82,83,88)</sup> while others used a combination of written case examples and written scenarios with pictures depicting the clinical cases (n=13)<sup>(27-29,47,54,57,60,67,68,72,84,86,89)</sup>. Representations of SES were indicated based on appearance of the patient, such as how they dressed and/or the description of the person which indicated their occupation. In studies that retrospectively or prospectively examined health data, health insurance status, or area level deprivation measures were applied to patient demographic information to measure the SES of the population.

## SES and HP Decision-making

Thirty-five of the forty-eight included primary research studies (73%) reported an association between SES and HP decision-making<sup>(9,18,19,47,51,52,54-58,60,62-66,68-73,76,77-79,81,82,83-87)</sup>. Meaning that in over two-thirds of the research papers reviewed HP decision-making about assessment, investigations, treatment, or care was influenced by a person's socioeconomic status. Thirteen papers did not detect any SES related bias in HP decision-making<sup>(25,27-29,44,53,59,61,67,74,80,88,89)</sup>. There were no discernible patterns or trends in the characteristics of these 13 papers, which

used a variety of methodologies, involved different HPs across a range of specialty settings. Interestingly, four papers by Haider et al.<sup>(27-29,67)</sup> did not find a link between SES and decision-making, but detected high levels of implicit favourable bias towards people with high SES, in doctors<sup>(28,67)</sup>, nurses<sup>(29)</sup> and medical students<sup>(27)</sup>. All these studies<sup>(27-29,67)</sup> combined the Implicit Association Test (IAT) and a vignette-based approach to assess the impact of implicit bias on decision-making. Three of these studies reported that 90.7% of doctors (n=215)<sup>(28)</sup>, 93% of nurses (n=245)<sup>(29)</sup> and 86% of medical students (n=211)<sup>(27)</sup> demonstrated an implicit preference toward people with High SES. However, in these studies<sup>(27-29)</sup>, the high levels of implicit SES bias were not evident in HP's decision-making. This result suggests that not all implicit bias leads to disparities in decision-making.

Table four below displays the research that links SES and decision-making by professional group. Three quarters of the research papers demonstrate a link between SES and decision-making in doctors (n=23)<sup>(9,18,19,47, 51,52,54-58,60,62-66,68-73)</sup>, medical students (n=3)<sup>(84-86)</sup> and nurses (n=3)<sup>(81-83)</sup>. Five of the six studies with multi-professional participants demonstrated a link between SES and decision-making (n=5)<sup>(75-79)</sup>. There was not enough data within the included studies that focused on Occupational Therapists and Psychological Therapists, to draw any meaningful conclusions about the relationship between implicit SES bias, and their decision-making (Table 3).

*Table 3: Link between SES and HP decision-making per professional group (research papers)*

| Professional Group      | Link found | link found % | No link found | No link found % | Grand Total |
|-------------------------|------------|--------------|---------------|-----------------|-------------|
| Doctor                  | n=23       | 74%          | n=8           | 26%             | n=31        |
| Medical student         | n=3        | 75%          | n=1           | 25%             | n=4         |
| Multi-professional      | n=5        | 83%          | n=1           | 17%             | n=6         |
| Nurse                   | n=3        | 75%          | n=1           | 25%             | n=4         |
| Occupational Therapist  | n=0        | 0%           | n=1           | 0%              | n=1         |
| Psychological Therapist | n=1        | 50%          | n=1           | 50%             | n=2         |
| Grand Total             | n=35       | 73%          | n=13          | 27%             | n=48        |

In our included research publications, we identified that there were some medical specialities in which there were three or more research studies exploring SES related implicit bias in HP decision-making (see Table 4). Every included study (n=7; 100%) on pain assessment and/or management<sup>(60,71,72,79,81-83)</sup> reported a link between decision-making and SES. In obstetric/contraception care 80% (n=4) reported a link between implicit SES bias and HP decision-making<sup>(62,75-77)</sup>. More than three quarters of the studies involving cancer care (n=6; 86%)<sup>(19,51,57,69,70,84)</sup> and all but one study (n=7; 87.5%)<sup>(9,18,55,56,68,78,85)</sup> exploring coronary heart disease (CHD) detected disparities in HP decision-making related to SES. Three of the nine papers that explored multiple conditions detected a link between SES and decision-making<sup>(58,65,66)</sup>. Two of the included research papers on diabetes<sup>(64,65)</sup> and one in mental health<sup>(87)</sup> found a link between SES and decision-making. The two studies exploring SES and decision-making in trauma care did not detect a link between SES and decision-making<sup>(28,67)</sup>. For the other specialities listed in table five a single research paper was included; asthma<sup>(73)</sup>, dermatology<sup>(63)</sup>, kidney transplantation<sup>(52)</sup>, palliative care<sup>(47)</sup> and sickle cell disease<sup>(86)</sup>.

Table 4: Link between SES and HP decision-making per specialty (research papers)

| Condition                | Link Found | Link Found % | No Link found | No Link Found % | Total |
|--------------------------|------------|--------------|---------------|-----------------|-------|
| Cancer Care              | n=6        | 86%          | n=1           | 14%             | n=7   |
| Multiple Conditions      | n=3        | 38%          | n=6           | 62%             | n=9   |
| Coronary Heart Disease   | n=7        | 86%          | n=1           | 14%             | n=8   |
| Pain Assess/Management   | n=7        | 100%         | n=0           | 0%              | n=7   |
| Obstetrics/Contraception | n=4        | 80%          | n=1           | 20%             | n=5   |
| Diabetes                 | n=2        | 67%          | n=1           | 33%             | n=3   |
| Mental Health            | n=1        | 50%          | n=1           | 50%             | n=2   |
| Trauma                   | n=0        | 0%           | n=2           | 100%            | n=2   |
| Asthma                   | n=1        | 100%         | n=0           | 0%              | n=1   |
| Dermatology              | n=1        | 100%         | n=0           | 0%              | n=1   |
| Kidney Transplantation   | n=1        | 100%         | n=0           | 0%              | n=1   |
| Palliative Care          | n=1        | 100%         | n=0           | 0%              | n=1   |
| Sickle Cell Disease      | n=1        | 100%         | n=0           | 0%              | n=1   |
| Total                    | 35         | -            | 13            | -               | 48    |

## Discussion

As far as we are aware, this scoping review is the first to scope wider literature about the reported impact of HP SES related bias on clinical decision-making, through a comprehensive and systematic search of all the available evidence. This pioneering scoping review has generated key insights into what has been published about HP implicit SES bias, and how it affects HPs attitudes or behaviours as they make decisions about the provision of care for patients. In addition, this scoping review has also revealed how SES can affect the interpersonal dynamics of the HP and patient/service user in their relationship during care delivery. This scoping review has identified strategies, techniques, and recommendations that have been postulated, implemented and/or evaluated to address implicit SES bias in HP clinical decision-making. The insights that have been generated from the scoping review can be used to inform efforts to ensure that everyone receives safe high-quality, person-centred, evidence-based care in a just and equitable manner from every HP that they encounter. We begin our discussion by focusing on the salient points from the results relating to HPs, research methods and measures of SES. This progresses into a tightly focussed discussion of our results aligned to each research question in relation to wider literature.

### Types of HP

It is worth noting that just under two thirds ( $n=31$ )<sup>(9,18,19,25,28,47,50-74)</sup> of research papers on HP SES implicit bias and decision-making focused on doctors/physicians, with significantly less studies focusing on interprofessional or multidisciplinary teams ( $n=6$ )<sup>(75-80)</sup>, nurses ( $n=4$ )<sup>(29,81-83)</sup>, and medical students ( $n=4$ )<sup>(27,84-86)</sup>. The number of papers exploring decisions made by non-medical HPs gains interest in the literature after 2008 and reflects the changing landscape of healthcare decision-making, and the extended role of Nurses and Allied HPs. The lower number of research papers exploring decisions made by non-medical HPs may also be an indication of the perceived importance of different healthcare professionals in patient care by those who fund research. The empirical evidence at hand indicates that more is known about doctors/physicians' implicit SES biases and its consequences with regards to their decision-making than other professions. Given the global shift toward more plural approaches to healthcare delivery in which other HPs have extended roles, such as non-medical prescribing, there needs to be greater focus in future research that explores any link between SES and decision-making of other professionals in healthcare and its consequences for patient care.

## Research Methods

Our results indicate that the association between HP implicit SES bias and their decision-making has been examined using a variety of different research methods. However, half of the studies (50%;  $n=24$ )<sup>(19,25,27,29,44,47,51,53,54,57,60,64,67,68,71,72,79,82-84,86,88,89)</sup> utilised a vignette approach which used a video recording, or combined written case exemplars, scenarios, and images of different types of people. Some studies ( $n=6$ )<sup>(27-29,67,68,72)</sup> used the Implicit Association Test (IAT) to gather data regarding the participants' favourable bias as a precursor to vignette examination of decision-making. Regardless of the research method used, in most studies, the information provided to the participants with regards to SES was predicated on the patient's visual appearance such as the clothes that they were wearing, or how they were described which provided an insight into their profession, and or education.

Given the preponderance of vignette based research on this topic, it is prudent to consider its utility in understanding HP decision-making. Vignette studies are adept at establishing judgement and decision-making in a variety of professions, which have a high level of applicability and generalisability about how HPs undertake their work on a day to day basis<sup>(94-95)</sup>. In addition, vignette studies are an effective way of exploring people's beliefs, perceptions, attitudes, behaviour, and biases<sup>(95-98)</sup>. However, the utility of this approach in decision-making studies is contingent on the researcher's ability to craft and word a written or visual vignette that reflects the complex nature of reality, and that sets out key information in line with best scientific practice<sup>(94-96,99)</sup>. A key issue with the use of vignettes in research is that the information that they contain and convey, may subconsciously relay, or reflect the researchers' own perspectives and/or biases, which may influence the information they provide, as well as how they describe others in the scenarios that they create. Hence, it is widely recommended that the vignettes are evidence-based, reviewed by expert peers, or patients, and subsequently pilot tested to ensure that they are valid, culturally appropriate, and clear before they are used in a study<sup>(94,96,100)</sup>. Equally, others<sup>(101)</sup> have opted to co-create vignettes with members of the population they research to ensure that they are culturally relevant, utilise the appropriate terms, and convey the perspective(s) of the people who are being characterised therein.

There is scope for the greater use of other research approaches such as high-fidelity simulation, prospective data collection, qualitative interviews, qualitative observation, quantitative surveys or questionnaires, and retrospective data reviews in studies on this topic. Conducting future research which uses some of these less commonly used approaches, on their own or in combination may shed new light on hitherto unknown or overlooked aspects of HP implicit SES related bias. This is particularly important as each research method has its own strengths and weaknesses, so using a combination of different approaches facilitates data triangulation, which can lead to more meaningful insights, enhance methodological rigour, and help to draw more robust conclusions from the data.

## Measures of SES

When developing the protocol for this study we made the decision to include proxy measures of SES and in retrospect this was an important decision. When exploring HP decision-making a number of proxy measures or indicators of SES have been utilised in the included research papers. Included papers used proxy measures such as occupation/Employment ( $n=15$ )<sup>(25,27,29,47,53-55,65,68,71,72,81,84,85,89)</sup>, Education ( $n=14$ )<sup>(9,28,52,58,59,61-63,70,78-80,82,89)</sup>, Income/Finances ( $n=11$ )<sup>(9,18,57,69,71,72,74-76,78,80)</sup>, appearance/dress ( $n=7$ )<sup>(19,25,53,64,83,85,88)</sup>, Health Insurance ( $n=3$ )<sup>(18,19,56)</sup>. A Formal SES or deprivation measure was used in only three of the studies included in this review<sup>(9,66,69)</sup>. We are aware that the inclusion of papers with single discrete measures such as these may be contested from a social science perspective, as SES is invariably multifaceted and complex<sup>(17)</sup>. A comprehensive discussion about the utility or otherwise of different discrete or proxy measures is beyond the remit of this paper, but there are some constraints to the use of some discrete measures such as income as a proxy for SES. The results of this scoping review support our view that proxy measures for SES, albeit with their limitations, can provide useful insights into HP implicit bias and its consequences for their clinical decision-making about patient care<sup>(17)</sup>. Therefore, by mapping the different methods that are used to measure and report SES in different types of publications, it is hoped that there is a clear overview of how they have been utilised in different contexts.

### RQ1: Bias and Stereotyping

HPs make different judgements or decisions about assessment, treatment and care based on who the patient is, as opposed to what they present with<sup>(64)</sup>. Three examples of this are highlighted below drawing on the evidence pertaining to pain assessment/management, maternity/contraception care and cardiac care. Wilson<sup>(81)</sup>, Anastas<sup>(72)</sup>, and Brandao et al.'s<sup>(82)</sup> studies highlight stereotyping as an influence in HP behaviour and decision-making. Brandao<sup>(82)</sup> reported that people with low SES were viewed as less credible during pain assessment by a HP. Anastas<sup>(72)</sup> and Wilson's<sup>(81)</sup> studies both found that people with low SES were often viewed as being untrustworthy and incapable during pain assessment, which led to disproportionate concerns about possible opioid addiction and triggered 'gate keeping' behaviours in the HP and this affected pain management decisions. Stereotyping and bias were also reported in maternity and family planning studies<sup>(65,76,77)</sup>. Manzer<sup>(77)</sup>, Smith-Oka<sup>(76)</sup> and Shawahna's<sup>(65)</sup> studies identified the adverse impact of stereotyping on HPs assessment and decision-making. In these studies HPs considered women with low SES to be untrustworthy, bad mothers and/or promiscuous, as well as lacking capacity to make sensible decisions about planning future pregnancies<sup>(65,77,76)</sup>. Manzer<sup>(77)</sup>, Smith-Oka<sup>(76)</sup> and Shawahna<sup>(65)</sup> studies also reported that women with low SES were subject to biased disparities in advice, guidance, and management that nudged women toward using longer term (and on occasions irreversible) contraceptive options. Agerstrom et al<sup>(78)</sup> found that people with low SES were more likely to receive delays in cardiac arrest care compared to patients with higher SES. In this study<sup>(78)</sup>, the results revealed that highly educated patients ( $P < 0.001$ ) and patients with higher income ( $P = 0.001$ ) were significantly more likely to have their heart rhythm monitored prior to the onset of the cardiac arrest (holding all other variables). Heart rhythm monitoring was significantly associated with less delay, shorter duration, increased immediate survival and 30-day survival<sup>(78)</sup>. In this instance, SES related discrimination was associated with HP decision-making about who gets cardiac monitoring, which impacted on timely cardiac arrest care and patient survival. Goddu et al.'s<sup>(86)</sup> study highlights that perceptions and stereotyping amongst HPs can be triggered prior of in-person meetings with patients through language and words used in medical records or referral letters. This suggests that SES related stigma and bias can unwittingly be transmitted among HPs through the words and language that are used to characterise the person receiving care as well as to describe their lived experience. Therefore, the words, terminology, and language in reference to the people seeking or receiving care seem to be a key influence and, in some cases, a predeterminant of HP attitudes and behaviour that can adversely affect clinical outcomes.

Social psychologists describe two fundamental dimensions of social perception when considering bias and stereotyping that help us to understand how people see each other<sup>(102)</sup>. The stereotype content model (SCM) was first proposed by Fiske<sup>(103,104)</sup> and provides a theory that explains how individuals form impressions, assumptions, and judgements of other individuals or groups based on their perceived warmth or capability. This theory is useful when making sense of the biases that might be impacting on HP interaction with patients and when making decisions<sup>(102)</sup>. The first dimension of the SCM relates to the **warmth** of a person, for example, how friendly or trustworthy they appear to be<sup>(103)</sup>. A person who is cooperative is deemed warm, and a person who is perceived as resistant is perceived as cold<sup>(104)</sup>. The second dimension relates to the **capability** of the person, for example, how skilled, intelligent, or competent they appear<sup>(103,104)</sup>. Warmth is evaluated first because it predicts future behaviour; capability is judged more slowly as it reflects the other person's ability to act competently<sup>(26)</sup>. In terms of SES or social class, for example, wealthier people are stereotyped as intelligent and better educated, therefore more capable than poorer people of lower SES or class<sup>(26)</sup>. SES can be signalled in many ways, the way a person dresses, their mannerisms or their accent, and these cues lead to behaviour changes that impact on the interaction between people<sup>(26)</sup>. The interaction between people is a dynamic process in the context of healthcare, so HPs make conscious and subconscious judgements about the other person, while simultaneously, the person seeking, or receiving healthcare makes similar judgements about the HP, this is then manifest through dialogue and influences how they see each other. Stereotypes do not need to be consciously recognised to generate discrimination, they can be subconsciously held, and triggered in such a way that people use them to frame their actions and to rationalise what they do, or do not do, in an automatic process with little or no thought or self-awareness<sup>(105)</sup>. Consequently, SES

related stereotypes seem to be a contributing factor that maintain health inequalities, given that HP decision-making appears to lead to unwarranted variations in care and treatment<sup>(64)</sup>.

### *Time and cognitive load*

A recurring theme is the reported influence of HP workload on implicit bias and decision-making. There is evidence to suggest that HPs rely on implicit messages to 'fill the gaps' in comprehensive assessment when time and effortful thought are limited or prevented. Several papers<sup>(11,75,106,107)</sup> suggest that the contribution of cognitive load, stress and limited time-restraints impact on the HP's motivation to suppress implicit bias when making decisions. Self-awareness of one's own prejudice and bias is important when making decisions, but self-awareness is diminished when the HP is busy and does not have sufficient head space to mitigate the impact of potential implicit bias<sup>(108)</sup>. Decision-making is ideally a controlled process which involves making intentional, conscious, and effortful thought<sup>(108)</sup>. However, if the HP is engaged in high levels of mental activity, is stressed or has limited time, then this can interrupt, impair or prevent a controlled thoughtful decision<sup>(108)</sup>. In these circumstances stereotyping is used as an energy saving mechanism that allows for intellectual shortcuts in decision-making that feel comfortable because they fit with what we think we know<sup>(11)</sup>. Therefore, HPs are less patient-centred in these circumstances and the unique features of the patient (which are discovered during comprehensive assessment) can be replaced with stereotypical patterns based on the patient belonging to a certain social group/s<sup>(11,107,108)</sup>. Brown<sup>(75)</sup> discovered that HPs took greater effort to ensure the confidentiality of the HIV diagnosis was protected for women with high SES. The HPs in the Brown study<sup>(75)</sup> considered confidentiality to be less of a priority for the women with low SES because their social position was less important. Brown<sup>(75)</sup> discovered that this bias tended to be activated when staff were overburdened and/or where health services were poorly resourced. There is also evidence that shows stereotyping can assist in coping with the pressures of HP practice<sup>(109)</sup>. Spending less time with patients with low SES may be perceived as helping to 'move clinics along,' because of the HP assumption that some people will not need as long as other people in clinic. Patients with low levels of SES, can often be viewed as needing less information because of an assumption they do not wish to be informed, because they ask less questions or because they do not have the capacity to retain information, and this assumption actually helps the clinic to regain lost time<sup>(109)</sup>.

### *Intersectionality of SES and other factors*

Intersectionality refers to the interactivity of different social identity structures such as race, class and gender, and how belonging to more than one social identity group can have a greater negative effect than belonging to one group alone<sup>(16,110)</sup>. Our results show that intersectionality can have a powerful cumulative effect on HP assessment and subsequent decision-making. Stereotypes and prejudices are stackable and the proclivity towards discriminatory attitudes, tendencies, and behaviours rises as perceived vulnerability of the person seeking or receiving care increases<sup>(16)</sup>. Denburg et al<sup>(57)</sup> explored race and social vulnerability for men with localised prostate cancer and discovered that the higher the perceived patient vulnerability by the HP, the more likely they were to opt for 'watchful waiting' as opposed to active treatment. For example, men who were deemed to have a low income, were widowed, or were characterised as being black by HPs, were the least likely to be referred for radical prostatectomy. McKinlay<sup>(18)</sup> explored non-medical influences on HP decision-making for patients with coronary heart disease and found that discriminatory attitudes and behaviours were linked to the patient's age, perceived level of income, and insurance status. Older adults with low income and without medical insurance were less likely to receive a primary cardiac diagnosis, however this discrimination did not affect younger patients who were low income and without insurance<sup>(18)</sup>. Fitzgerald's<sup>(16)</sup> systematic review which explored implicit bias in healthcare professionals, highlighted how perceptions relating to race, SES, and gender intersect, but also interact in complex ways. The intersectional interaction between different factors is arguably a reflection of the continuous nature of perceived warmth and capability matrix as previously described in the SCM, but the outcome for the patient can be bleaker when racial and class biases stereotypes overlap<sup>(26)</sup>. Our results about the complex intersection of SES and other factors such as race

are consistent with wider evidence from other studies. For example, there is evidence which shows that controlling for SES, people who are of Afro-Caribbean heritage are three times more likely to be diagnosed with diabetes than their counterparts of European heritage, while people who are Lesbian, Gay, Bisexual, Transgender or identify as Queer are more likely to have multiple risk for cardiovascular disease than their heterosexual peers<sup>(4)</sup>. The evidence collected on intersectionality in this review demonstrates the importance of multivariable reviews of implicit bias, therefore exploring SES, race, age, or gender as individual factors in isolation will not tell the whole story. Instead, the intersectionality the distinctive characteristics, and traits that a person has as well as the social groupings that they belong to must be considered, especially given their complex interactions and cumulative effect on the care of patients is the correct way forward when we seek to understand patient experience.

### *RQ2 SES and HP Decision-making*

Dialogue plays a key role in how we see each other<sup>(111)</sup>. Initial impressions of both the HP and patient can be corrected through interaction between both parties<sup>(112)</sup>. Initial impressions of warmth and competence can be adjusted through dialogue during the assessment and decision-making process. This interaction however requires motivation for one or other party<sup>(51)</sup>. A motivated HP who offers more time, seeks the input of the patient, and consciously considers equality and/or equity can build a dialogue with the person based on 'what matters most to them'<sup>(103)</sup>. In the same way a patient who demonstrates existing knowledge and has an active or assertive manner in dialogue with the HP can influence the HP decision-making by altering the HPs assumptions related to the warmth or competence of the patient<sup>(51)</sup>.

Manderbacka<sup>(55)</sup> exploration of decision-making in relation to 'white collar' and 'blue collar' patients found that doctors were more likely to take a 'doctor-centred model' for communication, assessment and decision-making with patients from a 'blue collar' background, but tended to adopt a 'person-centred and shared decision-making model' with 'white collar' background patients. It is not always the case that a person who is inferred as capable is automatically also perceived as warm on the SCM matrix<sup>(113)</sup>, in fact some research has shown that when a person is viewed as capable and competent then the perception of warmth is viewed less positively<sup>(102,103,113)</sup>. This can mean that when a patient is perceived as lacking capability or competence then their warmth can be viewed more positively as a compensatory effect, which in turn triggers a greater paternalistic behaviour from the HP, that effects their communication style and quality<sup>(113)</sup>. Castaneda-Guarderas et al<sup>(114)</sup> and Krupat et al<sup>(51)</sup> assert that the perceived power differential between the HP and the patient can inhibit shared decision-making because it negatively effects patient trust<sup>(114)</sup>. Patients are less likely to participate in dialogue and shared decision-making if they perceive the HP as judgemental, in this way HP bias can trigger the patient's bias in a dynamic way, adversely affecting dialogue and patient centred care<sup>(51)</sup>.

Patient assertiveness can lead to more careful diagnostic testing for people who may have been otherwise disadvantaged because of their SES (56). Barnhart et al<sup>(56)</sup> explored non-medical reasons for disparities in coronary heart disease treatments and discovered that if patients with low SES adopted a health assertive manner, then their treatment recommendations (revascularisation) more closely mirrored patients who had high SES. Krupat et al<sup>(51)</sup> explored the effect of patient assertiveness in HP decision-making for older adults with breast cancer and similarly discovered that patients with low SES were more likely to have full staging of their cancer investigated when they made assertive requests. In both these studies<sup>(51,56)</sup> patient assertiveness led to more careful diagnostic testing for people who may have been otherwise disadvantaged because of their SES. Therefore, there is empirical evidence which suggests that implicit SES bias can manifest itself in HP-patient behaviours that impede relationship building, which could be mitigated with greater HP self-awareness and greater patient assertiveness<sup>(51,56,111)</sup>. Further research is needed to explore the impact of patient assertive requests on HP decision making. It is increasingly recognised any such improvement efforts that seek to address health inequalities, such as those caused by HPs implicit SES bias, must involve meaningful co-production and dialogue about health inequalities that enables and empowers people to have agency and to take action<sup>(115)</sup>.

### *RQ3 Measures to address HP implicit bias related to SES.*

We integrated a range of recommendations from included publications into three main themes: further research, education/training and policy, and guidelines. The reviewed papers highlight the need for further research to explore in more detail the reasons and mechanisms in which social factors affect and influence HP decision-making<sup>(54,55,59,61,63,69,72,73,82)</sup>. There is a gap in understanding mechanisms that prevent or inhibit the implicit judgment surfacing as explicit actions, particularly related to HP time and cognitive load<sup>(61,108)</sup>. Hence, this gap in understanding is a key priority for any future research and improvement efforts that seek to address HPs SES related decision-making and its negative impact on patient care.

Another recommendation arising from the reviewed papers is the exploration of education and training for both HPs and patient groups which seeks to increase HP self-awareness through perspective taking and/or help patients with health literacy and assertiveness<sup>(9,51,56,60,68,70,71,76,77,82,84,85)</sup>. There appears to be a gap in the evidence that requires further exploration, specifically, there are as yet unanswered questions about how training can successfully raise awareness of SES bias, and how the impact of this training on clinical practice can be assessed or evaluated in the short term and longer term<sup>(116)</sup>. The impact of health literacy education on SES related bias is outside of this scoping review, but moving forward, it would be prudent to consider how health literacy and assertiveness education with patients might help facilitate more active participation for patients with low SES, which may have a role in reducing health inequalities<sup>(56)</sup>.

Policies, guidelines, and best practice statements, which recognise the impact of SES on HP decision-making are needed to guide the HP when making decisions that inevitably include non-medical factors<sup>(58,70,75)</sup>. A smaller number of papers recommend that any such policies, guidelines, and best practice statements should be constructed with mindfulness of implicit bias<sup>(75,117)</sup>. Implicit bias needs to be explicitly discussed and integrated into the policy and guidelines that help to shape HP interactions and patient experience. There is evidence of this work is happening to help support people of global majority heritage who are minoritised because they are categorised as non-white<sup>(118)</sup>. This work must be expanded to include SES related bias, given its pervasive nature, as well as its complex interaction and intersection with race in relation to patient care.

### Strengths and limitations

This scoping review has its limitations which must be given consideration. Most included publications are from North America and Europe in the global north, therefore the relevance of its results to other parts of the world, especially those that are part of what is increasingly referred to as the global south is limited. The fact that only articles published in English were included, means that relevant works in other languages will have been omitted from this review. Consequently, the result of this scoping review provided a limited insight into other parts of the world, particularly those where English is not the native language, as well as in places where the organisation and delivery of healthcare takes place in systems that are distinct from those in North America and/or Europe. Conversely, the inclusion of research studies and other types of publications broadened the depth and breadth of this review. There was no critical appraisal or quality assessment of the included research studies, which is in keeping with JBI scoping review methodology<sup>(39,40)</sup>, and was apt; the focus was on mapping the literature on this topic. Drawing upon our diverse range of skills as patient and public interest representative (BA), a Librarian/Information Technologist (AC), and three HP academics (CJ, PG, RS), we reached a consensus on how best to convey the results to others in plain English, a series of recommendations for implementation in practice, as well as the priorities for future research.

### Implications for Practice and Policy

A key message arising from this scoping review for health services, professional bodies, and policy makers is that HP's have SES related implicit biases that influence how they organise and deliver patient care. HP decision-making is



1 also subject to non-medical factors, as assumptions are often made about the care of people of low SES based on  
2 bias and stereotyping, which causes, or exacerbates health inequalities that can adversely affect patient's clinical  
3 outcomes<sup>(64)</sup>. It is important that we remain mindful that some people do not receive equitable care, so there is a  
4 responsibility for all HPs to do what they can to be better informed about their own practice in relation to equity,  
5 and to do what they can to address this issue. Heffernan<sup>(116)</sup> contends that people can find it unpalatable when they  
6 are confronted with evidence that challenges their firmly held big ideas, such as HPs who believe that they do no  
7 harm and always seek to do good, being informed that their implicit SES related biases may have deleterious impact  
8 on the quality, safety, and equity, of patient care. It is always tempting for people to elide inconvenient truths or  
9 unpalatable facts because if they are accepted, then the individual is compelled to deal with things in a different way  
10 or to address gaps in their knowledge, attitude, skills, and behaviour, which is nearly always challenging. Turning a  
11 blind eye to biases can feel safe for an individual HP, but it is morally untenable as it contravenes the values that  
12 underpin healthcare and increasing the likelihood of people who are vulnerable, marginalised, silenced, and/or  
13 overlooked by wider society enduring unwarranted variations in care, receiving suboptimal care that is delivered in  
14 an iniquitous and unjust manner.  
15  
16  
17  
18

19 It is challenging for anyone to be truly objective and self-critical about their clinical practice, especially with regards  
20 to implicit bias which is tacit and often reflects normalised patterns of thinking and behaviour. In other words,  
21 everyone has a rationale or vocabulary of motive, for what they do or do not do, which means that it is challenging  
22 for anyone to accept that they have implicit biases, which are often contrary to the way a person thinks about  
23 themselves and their behaviour towards others. On the other hand, genuine changes in behaviour and improvement  
24 in any human endeavour can only arise when there is a genuine acceptance of truth of the situation, specifically facts  
25 and issues at hand, including any implicit biases, with a concomitant theory of action<sup>(119)</sup>. As challenging as this may  
26 be, it is important to bear in mind that a transformation programme of action, especially in terms of improvement,  
27 requires a willingness to confront and examine all possible truths by asking searching questions, in this case about  
28 the organisation and delivery of healthcare. This sentiment is summed up in the view that not 'knowing something'  
29 is understandable because we are human, provided that the person is not turning a blind eye because they 'don't  
30 want to know'<sup>(116)</sup>.  
31  
32  
33  
34  
35

36 Health inequalities only endure because of a lack of insight or willingness to address social injustice, social  
37 indifference, an ideological stance of a vacuum of leadership<sup>(115)</sup>. Given what this scoping review has surfaced about  
38 the potential impact of implicit SES related HP bias greater consideration is needed about how the results can inform  
39 efforts to reduce health inequalities. It is also important to concede that HPs implicit biases often mirror those of  
40 wider society at any given point in time, because their values, beliefs, attitude, outlook, and world view will be  
41 tempered and influenced by the communities that they belong to and the wider culture that they inhabit. However,  
42 HPs are held to a higher moral standard than other members of society because of who they are and what they do,  
43 which comes with the requirement and expectation for them to treat all that they come across in an equitable, just  
44 manner with dignity and respect. Social status is linked to power, so for people of low SES, there is often a power  
45 differential between HP's and themselves<sup>3</sup>. Bias is dynamic; therefore, the HP-patient interaction can reinforce  
46 perceptions and judgemental attitudes that further embed prejudice or stereotypes. Our results suggest that  
47 healthcare commissioners, educators and regulators should embed measures to mitigate HPs implicit SES related  
48 bias through policy, guidelines, or best practice statements. Healthcare commissioners, policy makers, educators,  
49 and regulatory bodies would also do well to ensure that everyone involved on the organisation and delivery of  
50 healthcare, especially HPs know that implicit SES related bias increases the risk of the most vulnerable people in  
51 society. Simply put, implicit SES related bias by HPs tends to result in people who are the most vulnerable receiving  
52 the worst care, which has a harmful impact on their wellbeing, health related outcomes and life expectancy. Given  
53 the reality of praxis in healthcare within complex adaptive systems, normalising the practice of HPs taking a brief  
54 intermission, when it is clinical safe and appropriate, to be self-aware and to seek a broader perspective, especially  
55 when they are under pressure or have a high cognitive load may help to overcome the impact of implicit bias on  
56 decision-making. Whatever view one adopts in relation to the issues raised by the results of this scoping review,  
57  
58  
59  
60

1 more research is needed to ensure that healthcare policy and practice are evidence-based in relation to HPs implicit  
2 SES related bias.  
3  
4

## 5 Conclusion

6 This scoping review explored different aspects of SES related implicit bias and HP decision-making. Research in this  
7 area has grown and evolved significantly and the disciplinary focus has recently shifted from doctors to the wider  
8 healthcare team. While there remains limited understanding about the circumstances in which implicit bias is most  
9 likely to appear, some evidence suggests that this might be related to the HP's cognitive load, as time pressures can  
10 diminish self-awareness.  
11  
12

13  
14 This review indicates that HPs often hold implicit bias of people with low SES, which can result in stereotyping and  
15 may compound or exacerbate health inequalities. It is therefore important to consider mechanisms to reduce the  
16 impact of this bias on HP decision-making. Greater awareness of the nature and potential impact of HPs implicit SES  
17 related bias and on patient care is urgently needed, as the bias associated with SES can make vulnerable people  
18 more vulnerable and may adversely affect clinical outcomes.  
19  
20

21  
22 Research that focuses on HP decision-making, the influence of non-medical factors, and the impact of limited  
23 time/high cognitive load, would therefore help the health community to develop evidence based interventions to  
24 mitigate HP bias. Real world solutions, which go beyond education, to identify appropriate approaches to HP  
25 decision making, are needed, to ensure decisions are equitable.  
26  
27

28 Our review highlights the need for relevant research to underpin related healthcare policy and practice. Based on  
29 the review, we have identified three pertinent research questions that should be prioritised in future work in this  
30 area:  
31

- 32 1. Does cognitive load reduce self-awareness of SES implicit bias and impact on the decision-making of the HP?
- 33 2. What are the best conditions to support shared decision-making with people who have low SES?
- 34 3. What training do HPs need to raise their self-awareness of implicit SES related bias and reduce its impact on  
35 their decision-making?  
36  
37  
38  
39  
40  
41  
42  
43  
44  
45  
46  
47  
48  
49  
50  
51  
52  
53  
54  
55  
56  
57  
58  
59  
60

## Figure legend Caption

Figure 1: Prisma Flow Diagram

## Author Contributions

CJ, RS, PG, AC and BA discussed and refined ideas regarding the search strategy. AC developed the search strategy and conducted the database searches. CJ and RS extracted data and drafted the results . CJ is lead author and guarantor. CJ, RS and PG discussed and drafted the discussion of the paper with contribution from AC and BA.

## Conflict of Interest Statement

None of the people listed below declare any conflict of interest which may arise from being named as an author on this manuscript.

## Funding Statement

There are no funders to report for this submission. The lead author, CJ, was in receipt of a stipend from the Research Capacity Building Collaboration Wales (RCBC) First into Research (FiR) Fellowship scheme, to backfill her job on a part time basis, to lead this scoping review.

## Data Sharing Statement

No additional data available.

## Ethics Approval Statement

Ethical approval was not sought for this scoping review because it was a desk top review of previously published work.

1 Author Statements  
2  
3

4 **Claire Job**

5 <sup>1</sup>School of Healthcare Sciences, Cardiff University; Cardiff, United Kingdom:

6 [jobc@cardiff.ac.uk](mailto:jobc@cardiff.ac.uk)  
7  
8  
9

10 **Bami Adenipekun**

11 <sup>2</sup>Patient and Public Involvement Representative

12 [badenipekun@gmail.com](mailto:badenipekun@gmail.com)  
13  
14  
15

16 **Anne Cleves**

17 <sup>3</sup>Velindre University NHS Trust Library, Cardiff University Information Services. Velindre Cancer Centre

18 Cardiff, United Kingdom

19 [lynchae1@cardiff.ac.uk](mailto:lynchae1@cardiff.ac.uk)  
20  
21  
22  
23

24 **Paul Gill**

25 <sup>4</sup>Department of Nursing, Midwifery and Health, Northumbria University, Newcastle, United Kingdom.

26 [Paul.gill@northumbria.ac.uk](mailto:Paul.gill@northumbria.ac.uk)  
27  
28  
29  
30

31 **Ray Samuriwo**

32 <sup>5</sup>School of Health and Social Care, Edinburgh Napier University, Sighthill Campus, Edinburgh

33 [r.samuriwo@napier.ac.uk](mailto:r.samuriwo@napier.ac.uk)  
34  
35  
36  
37  
38  
39  
40  
41  
42  
43  
44  
45  
46  
47  
48  
49  
50  
51  
52  
53  
54  
55  
56  
57  
58  
59  
60

## References

1. **Marmot, M.** Fairer Society Healthy Lives: the Marmot Review. Strategy Review of Health Inequalities in England post-2010. Available: <https://www.gov.uk/research-for-development-outputs/fair-society-healthy-lives-the-marmot-review-strategic-review-of-health-inequalities-in-england-post-2010>
2. **Black, D.** Inequalities in Health: The Black Report. London : Penguin, 1980. <https://www.sochealth.co.uk/national-health-service/public-health-and-wellbeing/poverty-and-inequality/the-black-report-1980/the-origin-of-the-black-report/>
3. **Phelan JC, Link BG, Tehranifar P.** Social conditions as fundamental causes of health inequalities: theory, evidence, and policy implications. *J Health Soc Behav*, 2010. 51 Suppl:S28-40. doi:10.1177/0022146510383498 pmid:http://www.ncbi.nlm.nih.gov/pubmed/20943581
4. **Amato, K. R., M.-C. Arrieta, M. B. Azad, M. T. Bailey, J. L. Broussard, C. E.** The human gut microbiome and health inequalities. *Proceedings of the National Academy of Sciences*. 2021; 118, 25.
5. **Hastert, TA. Ruterbusch, JJ. Beresford, SAA.** Contribution of health behaviours to the association between area level socioeconomic status and cancer mortality. *s.l. : 2016, Social Science and Medicine*. 148: 52-58.
6. **Diex-Roux, AV.** Investigating Neighbourhood and area effects on health. *American Journal of Public Health*. 2001; 91, 11: 1783.
7. **Schwab, AP.** Putting cognitive psychology to work: Improving decision-making. *Social Science & Medicine*. 2008; 67: 1861–1869.
8. **Fasano, HT. McCarter, MSJ. Simonis, JM. Hoelscher, GL. Bullard, MJ.** Influence of Socioeconomic Bias on Emergency Medicine Resident Decision Making and Patient Care. *Sim Healthcare*. 2021; 16: 85–91.
9. **Van Ryn, M. Burke, J.** The effect of patient race and socioeconomic status on physicians' perceptions of patients. *Soc Sci Med*. 2000; 50: pp813-828.
10. **Arpey, NC. Et al.** How Socioeconomic Status Affects Patient Perceptions of Health Care: A Qualitative Study. *Journal of Primary Care & Community Health*. 2017; 8, 3: 169–17
11. **Veesart, A. Barron, A.** Unconscious bias: Is it impacting your nursing care? *Nursing Made Incredibly Easy*. 2020: 47-49.
12. **Willems, S. et al.** Socio-economic status of the patient and doctor–patient communication: does it make a difference? *Patient Education and Counselling*. 2005; 56: 139–146.
13. **Job, C. Adenipekun, B., Cleves, A. Samuriwo, R.** Health professional's implicit bias of adult patients with low socioeconomic status (SES) and its effects on clinical decision-making: a scoping review protocol. *BMJ Open*. 2022; 12,
14. **Atkinson, A.B.** Multidimensional Deprivation: Contrasting Social Welfare and Counting Approaches. *The Journal of Economic Inequality*. 2003; 1: 51–65.
15. **Watson, V. Dibben, C. Cox, M. et al.** Testing the Expert Based Weights Used in the UK's Index of Multiple Deprivation (IMD) Against Three Preference-Based Methods. *Social Indicators Research*. 2019; 144, 3: 1055-1074.

16. **Fitzgerald, C. Hurst, S.** Implicit bias in healthcare professionals: a systematic review. *BMC Medical Ethics*. 2017; 18, 19, 1-18.
17. **Maule, A. J. and G. P. Hodgkinson.** "Heuristics, biases and strategic decision making." *The Psychologist*. 2002; 69-71., 15(2):.
18. **McKinlay, JB. Potter, DA. Feldman, HA.** Non-Medical influences on medical decision making. *Soc Sci Med*. 1996; 42, 5, 769-776.
19. **McKinlay, JB. Burns, RB. Durante, R. Feldman, HA et al.** Patient, physician and presentational influences on clinical decision making for breast cancer: results from a factorial experiment. *Journal of Evaluation in Clinical Practice*. 1997; 3, 1, 23-57.
20. **Beyer, K. Barod, R. Fox, L et al.** The Current Evidence for Factors that Influence Treatment Decision Making in Localized Kidney Cancer: A Mixed Methods Systematic review. *The Journal of Urology*. 2021; 206, 827-839.
21. **Maina IW, Belton TD, Ginzberg S, Singh A, Johnson TJ.** A decade of studying implicit racial/ethnic bias in healthcare providers using the implicit association test. *Social Science & Medicine*. 2018; 199:219-29.
22. **Thirsk LM, Panchuk JT, Stahlke S, Hagtvedt R.** Cognitive and implicit biases in nurses' judgment and decision-making: A scoping review. *International Journal of Nursing Studies*. 2022; 133:104284.
23. **Meidert U, Dönnges G, Bucher T, Wieber F, Gerber-Grote A.** Unconscious Bias among Health Professionals: A Scoping Review. *International Journal of Environmental Research and Public Health*. 2023; 20(16):65-69.
24. **Thompson J, Bujalka H, McKeever S, Lipscomb A, Moore S, Hill N, et al.** Educational strategies in the health professions to mitigate cognitive and implicit bias impact on decision making: a scoping review. *BMC Medical Education*. 2023; 23(1):455.
25. **Arber, A. McKinlay, J. Adams, A. Marceau, L. Link, C. O'Donnell, AO.** Patient Characteristics and Inequalities in doctors' diagnostic and management strategies relating to CHD: A video-simulation experiment. *Social Science and Medicine*. 2006; 62, 103-115.
26. **Durante F, Fiske ST.** How social-class stereotypes maintain inequality. *Curr Opin Psychol*. 2017 Dec; 10.1016/j.copsyc.2017.07.033., 18:43-48. doi:.
27. **Haider, AH. Sexton, J. Sriram, N. et al.** Association of Unconscious Race and Social Class Bias with Vignette-Based Clinical Assessment by Medical Students. *JAMA*. 2011; 306, 9: 942-951.
28. **Haider, AH. Schneider, EB. Sriram, N. et al.** Unconscious race and class bias: Its association with decision making by trauma and acute care surgeons. *Journal Trauma Acute Care Surgery*. 2014; 77, 3: 409-416.
29. **Haider, AH. Schneider, EB. Sriram, N et al.** Unconscious race and class biases among registered nurses: Vignette-based study using implicit association testing. *Journal American College of Surgeons*. 2015; 20, 6: 1077-1086.
30. **Nosek BA, Bar-Anan Y, Sriram N, Axt J, Greenwald AG.** Understanding and Using the Brief Implicit Association Test: Recommended Scoring Procedures. *PLOS ONE*. 2014; 9(12):e110938.
31. **Dehon E, Weiss N, Jones J, Faulconer W, Hinton E, Sterling S.** A Systematic Review of the Impact of Physician Implicit Racial Bias on Clinical Decision Making. *Academic Emergency Medicine*. 2017; 24(8):895-904.
32. **Greenwald AG, Smith CT, Sriram N, Bar-Anan Y, Nosek BA.** Implicit Race Attitudes Predicted Vote in the 2008 U.S. Presidential Election. *Analyses of Social Issues and Public Policy*. 2009; 9(1):241-53.

- 1 33. **Jala S, Fry M, Elliott R.** Cognitive bias during clinical decision-making and its influence on patient outcomes in the  
2 emergency department: A scoping review. *Journal of Clinical Nursing.* 2023; 32(19-20):7076-85.
- 3  
4 34. **Blanton H, Jaccard J, Klick J, Mellers B, Mitchell G, Tetlock PE.** Strong claims and weak evidence: Reassessing the  
5 predictive validity of the IAT. *Journal of Applied Psychology.* 2009; 94(3):567-82.
- 6  
7 35. **McConnell AR, Leibold JM.** Weak criticisms and selective evidence: Reply to Blanton et al. (2009). *Journal of*  
8 *Applied Psychology.* 2009; 94(3):583-9.
- 9  
10 36. **Ziegert JC, Hanges PJ.** Strong rebuttal for weak criticisms: Reply to Blanton et al. (2009). *Journal of Applied*  
11 *Psychology.* 2009; 94(3):590-7.
- 12  
13 37. **Ogungbe O, Mitra AK, Roberts JK.** A systematic review of implicit bias in health care: A call for intersectionality.  
14 *IMC Journal of Medical Science.* 2019; 13.
- 15  
16 38. **Featherston R, Downie LE, Vogel AP, Galvin KL.** Decision making biases in the allied health professions: A  
17 systematic scoping review. *PLOS ONE.* 2020; 15(10):e0240716.
- 18  
19 39. **Peters, MDJ, Godfrey, CM, Khalil, H, McInerney, P, Parker, D, Bald-Soares, C.** Guidance for conducting  
20 systematic scoping reviews. Joanna Briggs Institute. [Online] 2015.  
21 <http://cfkr.dk/media/353553/Guidance%20for%20conducting%20systematic%20scoping%20reviews.pdf>.
- 22  
23 40. **Godfrey, C.** Exploring the world “out there”: the use of scoping reviews in education research. 2020; pp. 859-860.
- 24  
25 41. **Sarkis-Onofre, R., F. Catalá-López, E. Aromataris and C. Lockwood.** How to properly use the PRISMA Statement."  
26 *Systematic Reviews.* *Systematic Reviews* 2021; 10(1): p. 117.
- 27  
28 42. **Tricco, AC, Lillie, E, Zarin, W. et al. Ann Intern Med.** PRISMA Extension for Scoping Reviews (PRISMA-ScR):  
29 Checklist and Explanation. *Ann Intern Med,* 2018; 169: 467-473.
- 30  
31 43. **Briggs., Joanna.** Template source of Evidence details, Characteristics and results Extraction Instrument; 2020:  
32 Available at: JBI template source of evidence details, characteristics and results extraction instrument - JBI Manual  
33 for Evidence Synthesis. s.l. : Available at:  
34 <https://wiki.jbi.global/display/MANUAL/Appendix+11.1+JBI+template+source+of+evidence+details%2C+characteristics+and+results+extraction+instrument,2020>.
- 35  
36 44. **Feldmann J, Puhan MA, Mütsch M.** Characteristics of stakeholder involvement in systematic and rapid reviews: a  
37 methodological review in the area of health services research. *BMJ open.* 2019; 9(8):e024587.
- 38  
39 45. **Page, MJ, McKenzie JE, Bossuyt PM, Boutron I, Hoffmann TC, Mulrow CD, et al.** The PRISMA 2020 statement: an  
40 updated guideline for reporting systematic reviews. *BMJ.* 2021; 372:n71. doi: 10.1136/bmj.n71.
- 41  
42 46. **Bradbury-Jones, C, Aveyard, H, Herberc, OR et al.** Scoping reviews: the PAGER framework for improving the  
43 quality of reporting. s.l. : *International Journal of Social Research Methodology.,* 2021. pp. 1-14.
- 44  
45 47. **Crane, D.** Decisions to Treat Critically Ill Patients: A Comparison of Social Versus Medical Considerations. *The*  
46 *Milbank Memorial Fund Quarterly.* Health and Society. 1975; Vol. 53, No.1, pp1-33.
- 47  
48 48. **Martin GP, Dixon-Woods M.** Can we tell whether hospital care is safe? *British Journal of Hospital Medicine.*  
49 2014; 75(9):484-5.
- 50  
51 49. **Martin GP, Aveling E-L, Campbell A, Tarrant C, Pronovost PJ, Mitchell I, et al.** Making soft intelligence hard: a  
52 multi-site qualitative study of challenges relating to voice about safety concerns. *BMJ Quality & Safety.* 2018;  
53 27(9):710-7.
- 54  
55  
56  
57  
58  
59  
60

- 1  
2  
3  
4  
5  
6  
7  
8  
9  
10  
11  
12  
13  
14  
15  
16  
17  
18  
19  
20  
21  
22  
23  
24  
25  
26  
27  
28  
29  
30  
31  
32  
33  
34  
35  
36  
37  
38  
39  
40  
41  
42  
43  
44  
45  
46  
47  
48  
49  
50  
51  
52  
53  
54  
55  
56  
57  
58  
59  
60
50. **Feldman, HA. McKinlay, JB. Potter, DA. Freund, RB et al.** Nonmedical Influences on Medical Decision Making: An Experimental Technique using Videotapes, Factorial Design and Survey Sampling. *Health Services Research*. 1997; 32, 3, 344-366.
51. **Krupat, E. Irish, JT. Kasten, LE. et al.** Patient Assertiveness and Physician decision making among older breast cancer patients. *Social Science & Medicine*. 1999; 49, 449-457.
52. **Gordon, EJ. Sehgal, AR.** Patient-Nephrologist Discussions about Kidney Transplantation as a Treatment Option. *Advances in Renal Replacement Therapy*. 2000; 7, 2, 177-183.
53. **Mc Kinlay, JB. Freund, K. Moskowitz, M.** The Unexpected Influence of Physician Attributes on Clinical Decisions: Results of an Experiment. *Journal of Health and Social Behavior*. 2003; 43, 92-106.
54. **Tamayo-Saver, J. Dawson, NV. Hlnze, SW. et al.** The effect of race/ethnicity and desired social characteristics on physicians' decisions to prescribe opioid analgesics. *Acad Emerg Med*. 2003; 10, 11; 1239-1248 .
55. **Manderbacka, K.** Exploring gender and socioeconomic differences in the treatment of coronary heart disease. *European Journal of Public Health*. 2005; 15 (6), 634-639.
56. **Barnhart, JM. Cohen, O. Wright, N. et al.** Can Non-medical Factors Contribute to Disparities in Coronary Heart Disease Treatment? *Journal of Health Care for the Poor and Underserved*. 2006; 17(3), pp559-574.
57. **Denburg, TD. Kim, FJ. Flanigan, RC. Fairclough, D et al** The influence of patient race and social vulnerability on Urologist treatment recommendations in localised prostate cancer. *Med Care*. 2006; 44, 1137-1141.
58. **Bernheim, SM. Ross, JS. Krumbolz, HM, Bradley, EH.** Influence of patients' socioeconomic status on clinical management decisions: A Qualitative Study. *Annals of Family Medicine*. 2008; 6, 1, 53-59.
59. **Eggy, S. Albrecht, TL. Harper, WK.** Oncologists' recommendations of clinical trial participation to patients. *Patient education and counseling*. 2008. 70; 143-148.
60. **Nampiaparampil, DE. Nampiaparampil, JX. Harden, RN.** Pain and Prejudice. *Pain Management*. 2009; 10(4), 716-721.
61. **Ceballo, R. Abbey, A. Schooler, D.** Perceptions of women's infertility: what do physicians see? *Fertility and Sterility*. 2010; 93, 4: 1066-1073.
62. **Gilbert, A. Benjamin, A. Abenheim, HA.** Does education level influence the decision to undergo elective repeat caesarean section among women with previous caesarean section? *Journal of Gynaecological Can*. 2010; 32, 10, 942-947.
63. **Hajjaj, FM. Salek, MS. Basra, MKA. et al.** Nonclinical influences, beyond diagnosis and severity, on clinical decision making in dermatology: understanding the gap between guidelines and practice. *British Journal of Dermatology*. 2010; 163:789-799.
64. **McKinlay et al.** An additional cause of health care disparities: the variable clinical decisions of primary care disparities: the variable clinical decisions of primary care doctors. *Journal of Evaluation in Clinical Practice*. 2013; 19, 664-673.
65. **Shawahna, R. Rahman, N. Ahmad, M et al.** Prescribers' perspectives of the socioeconomic status and important indicators affecting prescribing behavior in a developing country *Cent. Eur. J. Med*. 2012; 7(1), 129-136.
66. **Lay-Yee, R. Scott A. Davis, P.** Patterns of family doctor decision making in practice context. What are the implications for medical practice variation and social disparities? *Social Science and Medicine*. 2013; 76, 47-56.



- 1  
2  
3  
4  
5  
6  
7  
8  
9  
10  
11  
12  
13  
14  
15  
16  
17  
18  
19  
20  
21  
22  
23  
24  
25  
26  
27  
28  
29  
30  
31  
32  
33  
34  
35  
36  
37  
38  
39  
40  
41  
42  
43  
44  
45  
46  
47  
48  
49  
50  
51  
52  
53  
54  
55  
56  
57  
58  
59  
60
67. **Haider, AH. Schneider, EB. Siriam, N. et al.** Unconscious race and social class bias amongst acute care surgical clinicians and clinical treatment decisions. *JAMA Surgery*. 2015; 150, 5: 457-464.
68. **Williams, RL. Romney, C. Kano, M. et al.** Racial, Gender, and Socioeconomic Status Bias in Senior Medical Student Clinical Decision-Making: A National Survey. *J Gen Intern Med*. 2015; 30(6):758–67 .
69. **Popescu, I. Schrag, D. Ang, A. Wong, M.** Racial/Ethnic and Socioeconomic Differences in Colorectal and Breast Cancer Treatment Quality. *Med Care*. 2016; 54, 8, 780-788.
70. **Gonzales, FA. Sangaramoorthy, M. Dwyer, LA. et al.** Patient-clinician interactions and disparities in breast cancer care: the equality in breast cancer care study. *Journal of Cancer Survivorship*. 2019; 13, 968–980.
71. **Hirsh, AT. Miller, MM. Hollingshead, NA. et al.** A randomized controlled trial testing a virtual perspective-taking intervention to reduce race and SES disparities in pain care. *Pain*. 2019; 160(10): 2229–2240.
72. **Anastas, TM. Miller, MM. Hollingshead, NA. Stewart, JC. Rand, KL. Hirsh, AT.** The Unique and Interactive Effects of Patient Race, Patient Socioeconomic Status, and Provider Attitudes on Chronic Pain Care Decisions. *Ann. behav. med*. 2020; 54: 771–782.
73. **Bynum, M.** Community Health Centres Primary Care Physicians Asthmas Management Perceptions of Uninsured Patients. *Professional Case Management*. 2020; 25, 6:335-342 .
74. **Khidir, H. McWilliams, M. O'Mailey, J. Zaborski, L et al.** Analysis of Consistency in Emergency Department Physician Variation in Propensity for Admission Across Patient Sociodemographic Groups. *JAMA*. 2021; 4, 9, 1-8 .
75. **Brown, KH.** Descriptive and normative ethics: Class, context and confidentiality for mothers with HIV. *Social Science Medicine*, 1993; 36, 3: 195-202.
76. **Smith-Oka, V.** Bodies of risk: Constructing motherhood in a Mexican public hospital. *Social Science & Medicine*. 2012; 75, 2275-2282.
77. **Manzer, JL. Bell, AV.** “We’re a Little Biased”: Medicine and the Management. *Journal of Health and Social Behavior*. 2021, Vol. 62(2) 120–135.
78. **Agerstrom, J. Carlsson, M. Bremer, A. et al.** Discriminatory cardiac arrest care? Patients with low socioeconomic status receive delayed cardiopulmonary resuscitation and are less likely to survive an in-hospital cardiac arrest. *European Heart Journal*. 2021; 42,: 861-869 .
79. **Bernardes, SF. Tome-Pires, C. Brandao, T et al.** Classism in pain assessment and management: the mediating role of female patient dehumanization and perceived life hardship. *Pain*. 2021; 162, 12, 2854-2864.
80. **Bruno, BA. Guirguis, K. Rofaief, D et al.** Is Sociodemographic Status Associated with Empathic Communication and Decision Quality in Diabetes Care? *Journal of General Internal Medicine*. 2022; 37, 12, 3013-3019.
81. **Wilson, B.** Can patient lifestyle influence the management of pain? *Journal of Clinical Nursing*. 2008; 18, 399-408.
82. **Brandao, T. Campos, L. De Ruddere, L et al.** Classism in Pain Care: The Role of Patient Socioeconomic Status on Pain Medicine. 2019; 20 (11), 2094–2105.
83. **Diniz, D. Castro, P. Bousfield, A. et al.** Classism and dehumanization in chronic pain: A qualitative study of nurses’ inferences about women of different socio-economic status. *British Journal of Health Psychology*. 2020; 25, 152-170.
84. **MacCormick, R. E.** Decision making in cancer treatment: age and socio-economic status as independent variables. *Medical teacher*; 1990. Vol. 12 Issue 3/4, p353.

- 1  
2  
3  
4  
5  
6  
7  
8  
9  
10  
11  
12  
13  
14  
15  
16  
17  
18  
19  
20  
21  
22  
23  
24  
25  
26  
27  
28  
29  
30  
31  
32  
33  
34  
35  
36  
37  
38  
39  
40  
41  
42  
43  
44  
45  
46  
47  
48  
49  
50  
51  
52  
53  
54  
55  
56  
57  
58  
59  
60
85. **Pettit, KE, Turner, JS, Kindrat, JK, et al.** Effect of Socioeconomic Status Bias on Medical Students–Patient Interactions Using an Emergency Medicine Simulation. *The Society for Emergency Medicine*. 2017; 1(2), 126-131.
86. **Goddu, AP, O’Conor, K, Lanzkron, S, et al.** Do Words Matter? Stigmatizing Language and the Transmission of Bias in the Medical Record. *J Gen Intern Med*. 2018; 33(5):685–91.
87. **Dougall, JL, Schwartz, RC.** The influence of client socioeconomic status on psychotherapist’s attributional biases and countertransference reactions. *American journal of psychotherapy*. 2011; 65,3, 249-265.
88. **Vliestra, T, Woodger, N, Morison, L.** Lower’ social class of a client evokes class self-awareness rather than discrimination in clinical reasoning: A video vignette study among British psychological and psychotherapeutic professionals working in the NHS. *Cancer Prevention Research*. 2020; Vols. 21, 335-347.
89. **Elholm Madsen, E, Morville, AL, Enemark Larsen, A, Hansen, T.** Is therapeutic judgement influenced by the patient’s socio-economic status? A factorial vignette survey. *Scandinavian Journal of Occupational Therapy*. 2014; 23, 4, 245-252.
90. **Abuzour AS, Lewis PJ, Tully MP.** A qualitative study exploring how pharmacist and nurse independent prescribers make clinical decisions. *Journal of Advanced Nursing*. 2018; 74(1):65-74.
91. **Weiss MC.** The rise of non-medical prescribing and medical dominance. *Research in Social and Administrative Pharmacy*. 2021; 17(3):632-7.
92. **Mertens JF, Koster ES, Deneer VHM, Bouvy ML, van Gelder T.** Factors influencing pharmacists’ clinical decision making in pharmacy practice. *Research in Social and Administrative Pharmacy*. 2023; 19(9):1267-77.
93. **Mills T, Patel N, Ryan K.** Pharmacist non-medical prescribing in primary care. A systematic review of views, opinions, and attitudes. *International Journal of Clinical Practice*. 2021; 75(3):e13827.
94. **Evans SC, Roberts MC, Keeley JW, Blossom JB, Amaro CM, Garcia AM, et al.** Vignette methodologies for studying clinicians’ decision-making: Validity, utility, and application in ICD-11 field studies. *International Journal of Clinical and Health Psychology*. 2015; 15(2) 160-70.
95. **Sheringham J, Kuhn I, Burt J.** The use of experimental vignette studies to identify drivers of variations in the delivery of health care: a scoping review. *BMC Medical Research Methodology*. 2021; 21(1):81.
96. **Chen N, Hsu CHC, L. Pearce P.** Developing Video Vignettes for Tourism Research: Protocol and Quality Indicators. *Journal of Travel Research*. 2022; 61(8):1828-47.
97. **Kunesh CE, Noltemeyer A.** Understanding Disciplinary Disproportionality: Stereotypes Shape Pre-Service Teachers’ Beliefs About Black Boys’ Behavior. *Urban Education*. 2019; 54(4):471-98.
98. **Cheng AW, Chang J, O’Brien J, Budgazad MS, Tsai J.** Model Minority Stereotype: Influence on Perceived Mental Health Needs of Asian Americans. *Journal of Immigrant and Minority Health*. 2017; 19(3):572-81.
99. **Eckerd S, DuHadway S, Bendoly E, Carter CR, Kaufmann L.** On making experimental design choices: Discussions on the use and challenges of demand effects, incentives, deception, samples, and vignettes. *Journal of Operations Management*. 2021; 67(2):261-75.
100. **Matza LS, Stewart KD, Lloyd AJ, Rowen D, Brazier JE.** Vignette-Based Utilities: Usefulness, Limitations, and Methodological Recommendations. *Value in Health*. 2021; 24(6):812-21.

101. **Blodgett AT, Schinke RJ, Smith B, Peltier D, Pheasant C.** In Indigenous Words: Exploring Vignettes as a Narrative Strategy for Presenting the Research Voices of Aboriginal Community Members. *Qualitative Inquiry*. 2011; 17(6):522-33.
102. **Dovidio, JF. Fiske, ST.** Under the Radar: How Unexamined Biases in Decision Making Processes in Clinical Interactions Can Contribute to Health Care Disparities. *American Journal of Public Health*. 2012; 102, 5:945-949.
103. **Fiske, ST.** Intergroup biases: a focus on stereotype content, *Current Opinion in Behavioral Sciences*. 2015; 45-50, V3.
104. **Susan T. Fiske** Stereotype Content: Warmth and Competence Endure Current Directions in Psychological Science. 2018; 27:2, 67-73.
105. **Jenkins, AC. Karashchuk, P. Zhu, L. et al.** Predicting human behavior towards members of different social groups. *PNAS*. 2018; 115, 39: 9696-9701.
106. **Chase, D. Salani, R. Farley, J et al.** Unwittingly biased: A note to gynecologic cancer providers. *Gynecologic Oncology*. 2021; 160 (3) 646-648.
107. **Crandlemire, LA.** Unconscious Bias and the Impacts on caring: The Role of the Clinical Nursing Instructor. *International Journal for Human Caring*. 2020; 24 (2), 84-91.
108. **Burgess, JD.** Are Providers More Likely to Contribute to Healthcare Disparities Under Higher Levels of Cognitive Load? How features of the Healthcare Setting May Lead to Biases in Medical Decision Making. *Medical Decision Making*. 2010; 30: 246-257.
109. **Kirkham, M. Stapleton, H. Curtis, P. et al.** Stereotyping as a professional defence mechanism. *British Journal of Midwifery*. 2002; 10, 9:549-552.
110. **Gopaldas, Ahir. "Intersectionality 101."** *Journal of Public Policy & Marketing*, vol. 32, 2013, pp. 90–94. JSTOR, <http://www.jstor.org/stable/43305317>. Accessed 15 Oct. 2023.
111. **Murphy, KA. Ellison-Barnes, A. Johnson, EN. et al.** The Clinical Examination and Socially At-Risk Populations. *Med Clin N Am*. 2018; 102, 521-532.
112. **Gopal, DP. Chetty, U. O'Donnell, P. et al.** Implicit bias in healthcare: clinical practice, research and decision making. *Future Healthcare Journal*. 2021; 8, 1: 40-48.
113. **Durante F, Capozza D, Fiske ST.** The Stereotype Content Model: The Role Played by Competence in Inferring Group Status. *TPM Test Psychom Methodol Appl Psychol*. 2010; 17(4):187-199.
114. **Castaneda-Guarderas, A. Glassberg, J. Grudzen, CR. et al.** Shared Decision Making With Vulnerable Populations in the Emergency Department. *Academic Emergency Medicine*. 2016; 23 (12) 1410-1416.
115. **Hassan, S. M., L. Melville-Richards, A. Ring, J. Cloke, S. Smith, P et al.** "Minding the gap: The importance of active facilitation in moving boundary objects from in-theory to in-use as a tool for knowledge mobilisation. *SMM- Qualitative Research in Health*. 2023; 3.100235.
116. **Heffernan, M.** *Wilful Blindness*. 2019 and London., Simon and Schuster Uk Ltd.
117. **Hemley, E. Peters, K.** 10 Steps for avoiding health disparities in your practice. *The Journal of Family Practice*. 2004; 53(3),193-196.
118. **Government, Welsh.** Anti-Racist Wales Action Plan. 2022. Available at : [Anti-racist Wales Action Plan | GOV.WALES](https://gov.wales/anti-racist-wales-action-plan/)

1  
2 119. **Samuriwo, R.** "Interprofessional Collaboration—Time for a New Theory of Action? *Frontiers in Medicine*. 2022  
3 and <https://www.frontiersin.org/articles/10.3389/fmed.2022.876715/full>, 9.  
4  
5  
6  
7

8 **Figure legend Caption**

9 Figure 1: Key terms and their operational definitions in this scoping review

10  
11 Figure 2: Prisma Flow Diagram  
12  
13  
14  
15  
16  
17  
18  
19  
20  
21  
22  
23  
24  
25  
26  
27  
28  
29  
30  
31  
32  
33  
34  
35  
36  
37  
38  
39  
40  
41  
42  
43  
44  
45  
46  
47  
48  
49  
50  
51  
52  
53  
54  
55  
56  
57  
58  
59  
60

For peer review only

Figure 1: Key terms and their operational definitions in this scoping review

| Key term                    | Operational Definition                                                                                                                                                                                                                                                                                                                                                                            |
|-----------------------------|---------------------------------------------------------------------------------------------------------------------------------------------------------------------------------------------------------------------------------------------------------------------------------------------------------------------------------------------------------------------------------------------------|
| Health Professional (HP)    | Any registered healthcare professional including Doctors, Surgeons, Nurses, Midwives, or Allied Healthcare Professionals.                                                                                                                                                                                                                                                                         |
| Clinical Decision-making    | A judgement or decision that influences any aspects of care organised or delivered by the HP such as choices made about the diagnostic tests, and referrals seeking specialist input. It also includes decisions about specific treatments such as surgical procedures, therapies, or medications, as well as ceasing or withdrawing active treatment.                                            |
| Socio Economic Status (SES) | Any single discrete measure of SES as set out in the Multiple Indices of Deprivation or the Multidimensions of Deprivation, including factors such as income, education, physical environment or neighbourhood quality, and health <sup>(14,15)</sup> . Any discrete measures that can be used as a proxy for the SES of a patient in HP decision-making such as income, unemployment, education. |

Figure 2: Prisma Flow Diagram

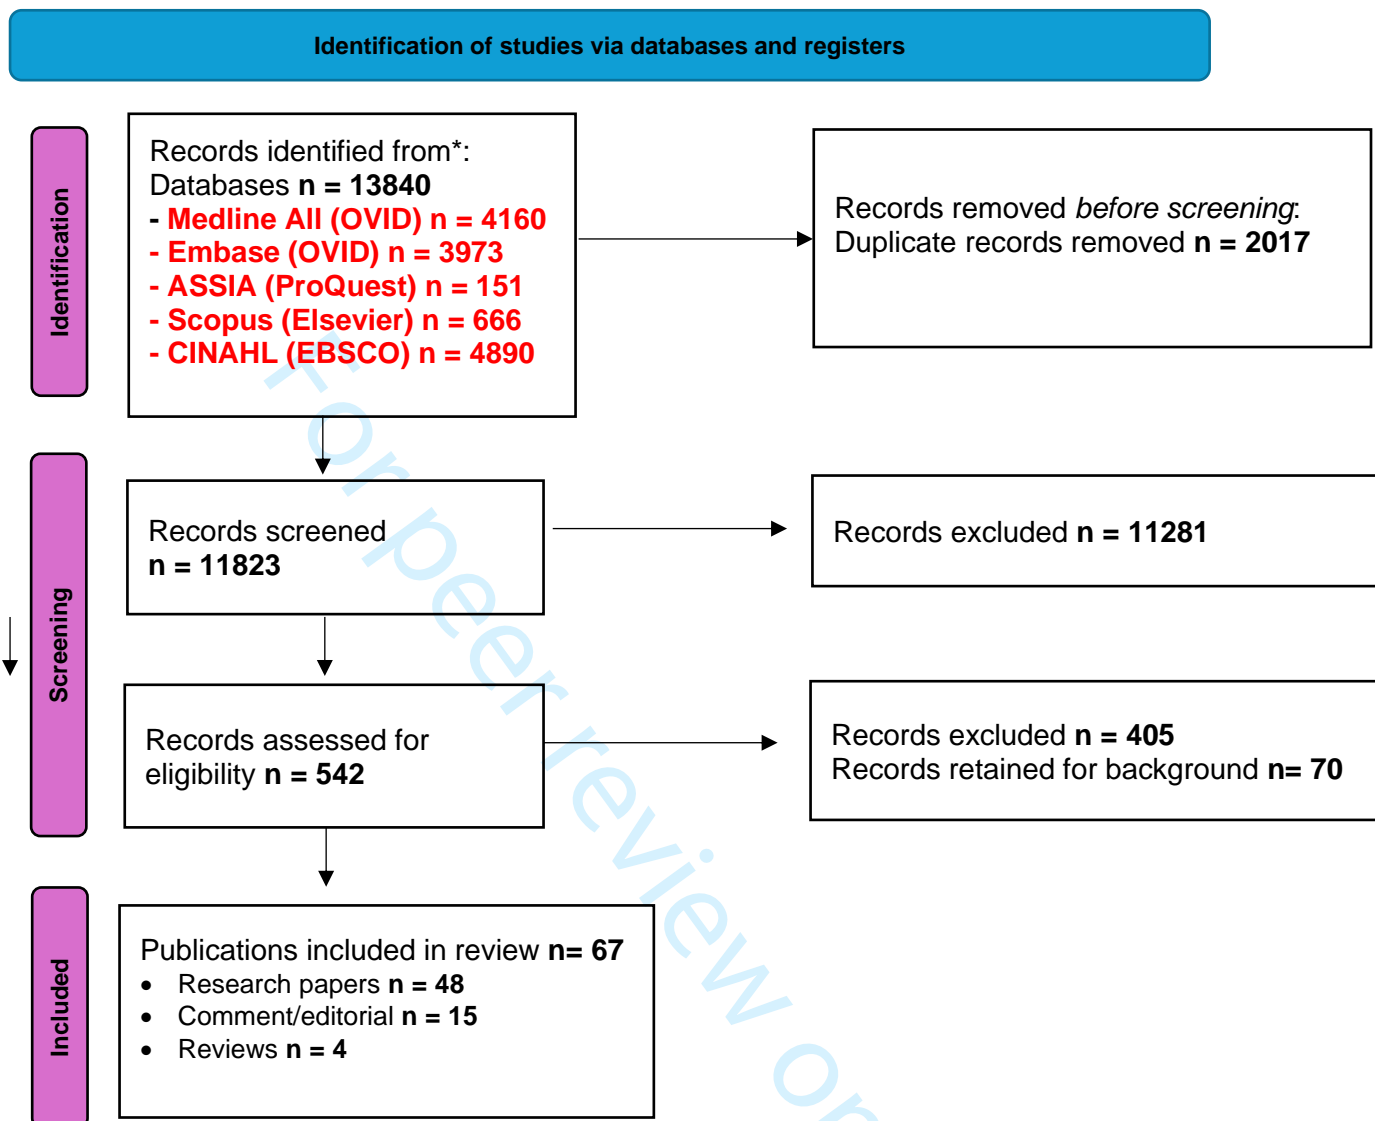

## **Supplementary Material – Search Strategies**

### **Medline ALL (OVIDSP): 1946 to present**

1. Socioeconomic Factors/
2. employment/
3. unemployment/
4. Economic Status/
5. Educational Status/
6. Medical Indigency/
7. exp Social Class/
8. exp Health Status Disparities/
9. exp Healthcare Disparities/
10. exp Poverty/
11. exp poverty areas/
12. ((social or socio economic or socioeconomic or economic or income) adj4 (deprivat\* or advantage\* or disadvantage\* or disparit\* or status or class or position or hierach\* or determinant\* or inequalit\* or inequit\* or barrier\* or circumstance\*)).tw.
13. ((education\* or employment) adj2 (status or level)).tw.
14. (sociodemographic or socio demographic or income or wealth or poverty or affluen\*).tw.
15. SES.tw.
16. 1 or 2 or 3 or 4 or 5 or 6 or 7 or 8 or 9 or 10 or 12 or 13 or 14 or 15
17. exp Clinical Decision-Making/
18. exp Decision Making/
19. Patient Care Management/
20. exp disease management/
21. ((Clinical or medical or health or treatment\*) adj2 (decision\* or decid\* or option\* or choice\*)).tw.
22. (treatment\* adj2 (select\* or recommend\* or receipt)).tw.
23. 17 or 18 or 19 or 20 or 21 or 22

- 1
- 2 24. exp Prejudice/
- 3
- 4 25. exp "Attitude of Health Personnel"/
- 5
- 6 26. exp Professional-Patient Relations/
- 7
- 8 27. exp Unconscious, Psychology/
- 9
- 10 28. "unconscious bias\*".tw.
- 11
- 12 29. ((Implicit or explicit) adj3 (cognition or bias\*)).tw.
- 13
- 14 30. prejudice.tw.
- 15
- 16 31. stereotyp\*.tw.
- 17
- 18 32. Classism.tw.
- 19
- 20 33. (treatment\* adj2 (unequal or differential)).tw.
- 21
- 22 34. (("Health professional\*" or nurse\* or doctor\* or clinician\* or physician\* or
- 23 registrar\* or intern\* or SHO\* or surgeon\* or student\* or AHP\* or allied or physio\* or
- 24 speech or occupational or Dietitian\* or therapist\* or radiographer\* or midwi\* or
- 25 "General Practitioner\*" or GP\*) adj3 (attitude or judg\* or bias)).tw.
- 26
- 27 35. exp Health Personnel/
- 28
- 29 36. exp Students, health occupations/
- 30
- 31 37. 35 or 36
- 32
- 33 38. exp Psychology, social/
- 34
- 35 39. exp Mental Processes/
- 36
- 37 40. 38 or 39
- 38
- 39 41. 37 and 40
- 40
- 41 42. 24 or 25 or 26 or 27 or 28 or 29 or 30 or 31 or 32 or 33 or 34 or 41
- 42
- 43 43. 16 and 23 and 42
- 44
- 45
- 46
- 47
- 48
- 49
- 50
- 51
- 52

### EMBASE (OVIDSP): 1947 to present

- 53
- 54
- 55 1. socioeconomic/
- 56
- 57 2. economic status/
- 58
- 59 3. income group/
- 60



- 1
- 2
- 3
4. poverty/
5. exp employment status/
6. exp educational status/
7. exp social status/
8. exp health care disparity/
9. exp health disparity/
10. ((social or socio economic or socioeconomic or economic or income) adj4 (deprivat\* or advantage\* or disadvantage\* or disparit\* or status or class or position or hierach\* or determinant\* or inequalit\* or inequit\* or barrier\* or circumstance\*).tw.
11. ((education\* or employment) adj2 (status or level)).tw.
12. (sociodemographic or socio demographic or income or wealth or poverty or affluen\*).tw.
13. SES.tw.
14. 1 or 2 or 3 or 4 or 5 or 6 or 7 or 8 or 9 or 10 or 11 or 12 or 13
15. exp clinical decision making/
16. exp medical decision making/
17. exp decision making/
18. patient care/
19. disease management/
20. ((Clinical or medical or health or treatment\*) adj2 (decision\* or decid\* or option\* or choice\*).tw.
21. (treatment\* adj2 (select\* or recommend\* or receipt)).tw.
22. 15 or 16 or 17 or 18 or 19 or 20 or 21
23. exp prejudice/
24. exp cognitive bias/
25. exp health personnel attitude/
26. exp professional-patient relationship/
27. exp ego development/
28. exp stereotypy/
29. prejudice.tw.

- 1
- 2 30. stereotyp\*.tw.
- 3
- 4 31. Classism.tw.
- 5
- 6 32. (treatment\* adj2 (unequal or differential)).tw.
- 7
- 8 33. (("Health professional\*" or nurse\* or doctor\* or clinician\* or physician\* or
- 9 registrar\* or intern\* or SHO\* or surgeon\* or student\* or AHP\* or allied or physio\* or
- 10 speech or occupational or Dietitian\* or therapist\* or radiographer\* or midwi\* or
- 11 "general practitioner\*" or GP\*) adj2 (attitude or judg\* or bias)).tw.
- 12
- 13
- 14 34. exp health care personnel/
- 15
- 16 35. exp health student/
- 17
- 18 36. 34 or 35
- 19
- 20 37. exp social psychology/
- 21
- 22 38. cognition/
- 23
- 24 39. mental function/
- 25
- 26 40. 37 or 38 or 39
- 27
- 28 41. 36 and 40
- 29
- 30 42. 23 or 24 or 25 or 26 or 27 or 28 or 29 or 30 or 31 or 32 or 33 or 41
- 31
- 32 43. 14 and 22 and 42
- 33
- 34 44. limit 43 to english language
- 35
- 36
- 37
- 38
- 39
- 40
- 41
- 42
- 43
- 44
- 45
- 46
- 47
- 48
- 49
- 50
- 51
- 52
- 53
- 54
- 55
- 56
- 57
- 58
- 59
- 60

### **ASSIA (Proquest): 1987 to present**

((MAINSUBJECT.EXACT.EXPLODE("Socioeconomic factors") OR  
 MAINSUBJECT.EXACT.EXPLODE("Socioeconomic indicators") OR  
 MAINSUBJECT.EXACT.EXPLODE("Socioeconomic conditions") OR  
 MAINSUBJECT.EXACT("Employment") OR  
 MAINSUBJECT.EXACT("Unemployment") OR MAINSUBJECT.EXACT("Poverty")  
 OR MAINSUBJECT.EXACT.EXPLODE("Low income people") OR ab((social  
 NEAR/4 (deprivat\* OR advantage\* OR disadvantage\* OR disparit\* OR status OR  
 class OR position OR hierach\* OR determinant\* OR inequalit\* OR inequit\* OR  
 barrier\* OR circumstance\*))) OR ab((socio economic NEAR/4 (deprivat\* OR  
 advantage\* OR disadvantage\* OR disparit\* OR status OR class OR position OR  
 hierach\* OR determinant\* OR inequalit\* OR inequit\* OR barrier\* OR  
 circumstance\*))) OR ab((socioeconomic NEAR/4 (deprivat\* OR advantage\* OR  
 disadvantage\* OR disparit\* OR status OR class OR position OR hierach\* OR

1 determinant\* OR inequalit\* OR inequit\* OR barrier\* OR circumstance\*)) OR  
 2 ab((sociodemographic OR socio demographic OR income OR wealth OR poverty  
 3 OR affluen\*)) AND (MAINSUBJECT.EXACT.EXPLODE("Decision making") OR  
 4 ab(((Clinical OR medical OR health OR treatment\*) NEAR/2 (decision\* OR decid\*  
 5 OR option\* OR choice\*)) OR ab((treatment\* NEAR/2 (select\* OR recommend\* OR  
 6 receipt)))) AND (MAINSUBJECT.EXACT("Bias") OR  
 7 MAINSUBJECT.EXACT.EXPLODE("Cognitive bias") OR  
 8 MAINSUBJECT.EXACT.EXPLODE("Prejudice") OR  
 9 MAINSUBJECT.EXACT.EXPLODE("Health professional-Patient relationships") OR  
 10 ab(((Implicit OR explicit) NEAR/3 (cognition OR bias\*)) OR ab("unconscious bias\*")  
 11 OR ab(Classism) OR ab((treatment\* NEAR/2 (unequal OR differential))) OR  
 12 ab(Stereotyp\*) OR ab((((("Health professional\*" OR nurse\* OR doctor\* OR clinician\*  
 13 OR physician\* OR registrar\* OR intern\* OR SHO\* OR surgeon\* OR student\* OR  
 14 AHP\* OR allied OR physio\* OR speech OR occupational OR Dietitian\* OR therapist\*  
 15 OR radiographer\* OR midwi\* OR "general practitioner\*" OR GP\*) NEAR/2 (attitude  
 16 OR judg\* OR bias\*)))) OR ab(prejudice\*))

### Scopus (Elsevier): 1960 to present

17 (( TITLE-ABS-KEY ( social W/4 ( deprivat\* OR advantage\* OR disadvantage\*  
 18 OR disparit\* OR status OR class OR position OR hierach\* OR determinant\*  
 19 OR inequalit\* OR inequit\* OR barrier\* OR circumstance\* )) ) OR ( TITLE-ABS-  
 20 KEY ( "socio economic" W/4 ( deprivat\* OR advantage\* OR disadvantage\* OR  
 21 disparit\* OR status OR class OR position OR hierach\* OR determinant\* OR  
 22 inequalit\* OR inequit\* OR barrier\* OR circumstance\* )) ) OR ( TITLE-ABS-KEY  
 23 ( socioeconomic W/4 ( deprivat\* OR advantage\* OR disadvantage\* OR disparit\*  
 24 OR status OR class OR position OR hierach\* OR determinant\* OR inequalit\*  
 25 OR inequit\* OR barrier\* OR circumstance\* )) ) OR (( TITLE-ABS-KEY (   
 26 sociodemographic ) ) AND ( TITLE-ABS-KEY ( income OR wealth OR poverty  
 27 OR affluen\* )) ) OR ( TITLE-ABS-KEY ( employment OR unemployment ) ) )  
 28 AND (( TITLE-ABS-KEY ( clinical W/2 ( decision\* OR decid\* OR option\* OR  
 29 choice\* )) ) OR ( TITLE-ABS-KEY ( medical W/2 ( decision\* OR decid\* OR  
 30 option\* OR choice\* )) ) OR ( TITLE-ABS-KEY ( health W/2 ( decision\* OR  
 31 decid\* OR option\* OR choice\* )) ) OR ( TITLE-ABS-KEY ( treatment W/2 (   
 32 decision\* OR decid\* OR option\* OR choice\* )) ) OR ( TITLE-ABS-KEY ( (   
 33 treatment OR clinical ) W/2 recommend\* )) ) AND (( TITLE-ABS-KEY ( "health  
 34 professional" -patient W/1 relations ) ) OR ( TITLE-ABS-KEY ( doctor-patient W/1  
 35 relations ) ) OR ( TITLE-ABS-KEY ( clinician-patient W/1 relations ) ) OR ( TITLE-  
 36 ABS-KEY ( nurse-patient W/1 relations ) ) OR ( TITLE-ABS-KEY ( "unconscious  
 37 bias\*" ) ) OR ( TITLE-ABS-KEY ( ( implicit OR explicit ) W/3 bias\* )) ) OR (   
 38 TITLE-ABS-KEY ( ( implicit OR explicit ) W/3 cognition ) ) OR ( TITLE-ABS-KEY (   
 39 classism ) ) OR ( TITLE-ABS-KEY ( prejudice\* ) ) OR ( TITLE-ABS-KEY ( ( "Health  
 40 professional" \* OR nurse\* OR doctor\* OR clinician\* OR physician\* OR  
 41

1 registrar\* OR intern\* OR sho\* OR surgeon\* OR student\* OR ahp\* OR allied  
 2 OR physio\* OR speech OR occupational OR dietitian\* OR therapist\* OR  
 3 radiographer\* OR midwi\* ) W/2 attitude\* ) ) OR ( TITLE-ABS-KEY ( ( "Health  
 4 professional" \* OR nurse\* OR doctor\* OR clinician\* OR physician\* OR  
 5 registrar\* OR intern\* OR sho\* OR surgeon\* OR student\* OR ahp\* OR allied  
 6 OR physio\* OR speech OR occupational OR dietitian\* OR therapist\* OR  
 7 radiographer\* OR midwi\* ) W/2 bias\* ) ) OR ( TITLE-ABS-KEY ( treatment\* W/2  
 8 ( unequal OR differential ) ) ) OR ( TITLE-ABS-KEY ( ( "Health professional" \*  
 9 OR nurse\* OR doctor\* OR clinician\* OR physician\* OR registrar\* OR intern\*  
 10 OR sho\* OR surgeon\* OR student\* OR ahp\* OR allied OR physio\* OR  
 11 speech OR occupational OR dietitian\* OR therapist\* OR radiographer\* OR  
 12 midwi\* OR "general practitioner\*" OR GP\* ) W/2 judg\* ) ) )

### 21 CINAHL (EBSCO): 1976 to present

22 S52 S16 AND S24 AND S50 Narrow by Language: - english

23 S51 S16 AND S24 AND S50

24 S50 S25 OR S26 OR S27 OR S28 OR S29 OR S30 OR S31 OR S32 OR S33 OR  
 25 S34 OR S35 OR S36 OR S37 OR S38 OR S39 OR S40 OR S41 OR S42 OR S49

26 S49 S45 AND S48

27 S48 S46 OR S47

28 S47 (MH "Mental Processes+")

29 S46 (MH "Psychology, Social+")

30 S45 S43 OR S44

31 S44 (MH "Students, Health Occupations+")

32 S43 (MH "Health Personnel+")

33 S42 AB (("Health professional\*" or nurse\* or doctor\* or clinician\* or physician\* or  
 34 registrar\* or intern\* or SHO\* or surgeon\* or student\* or AHP\* or allied or physio\* or  
 35 speech or occupational or Dietitian\* or therapist\* or radiographer\* or midwi\*) N2  
 36 (attitude or judg\* or bias\*))

37 S41 TI (("Health professional\*" or nurse\* or doctor\* or clinician\* or physician\* or  
 38 registrar\* or intern\* or SHO\* or surgeon\* or student\* or AHP\* or allied or physio\* or  
 39 speech or occupational or Dietitian\* or therapist\* or radiographer\* or midwi\* or  
 40 "general practitioner\*" or GP\*) N2 (attitude or judg\* or bias\*))

41 S40 AB (treatment\* N2 (unequal or differential))

42 S39 TI (treatment\* N2 (unequal or differential))

- 1  
2 S38 AB Classism  
3  
4 S37 TI Classism  
5  
6 S36 AB stereotyp\*  
7  
8 S35 TI stereotyp\*  
9  
10 S34 AB prejudice  
11  
12 S33 TI prejudice  
13  
14 S32 AB ((Implicit or explicit) N3 (cognition or bias\*))  
15  
16 S31 TI ((Implicit or explicit) N3 (cognition or bias\*))  
17  
18 S30 AB "unconscious bias\*"  
19  
20 S29 TI "unconscious bias\*"  
21  
22 S28 (MH "Unconscious (Psychology)")  
23  
24 S27 (MH "Professional-Patient Relations+")  
25  
26 S26 (MH "Attitude of Health Personnel+")  
27  
28 S25 (MH "Prejudice+")  
29  
30 S24 S17 OR S18 OR S19 OR S20 OR S21 OR S22 OR S23  
31  
32 S23 AB (treatment\* N2 (select\* or recommend\* or receipt))  
33  
34 S22 TI (treatment\* N2 (select\* or recommend\* or receipt))  
35  
36 S21 AB ((Clinical or medical or health or treatment\*) N2 (decision\* or decid\* or  
37 option\* or choice\*))  
38  
39 S20 TI ((Clinical or medical or health or treatment\*) N2 (decision\* or decid\* or  
40 option\* or choice\*))  
41  
42 S19 (MH "Disease Management")  
43  
44 S18 (MH "Decision Making+")  
45  
46 S17 (MH "Decision Making, Clinical+")  
47  
48 S16 S1 OR S2 OR S3 OR S4 OR S5 OR S6 OR S7 OR S8 OR S9 OR S10 OR  
49 S11 OR S12 OR S13 OR S14 OR S15  
50  
51 S15 AB SES  
52  
53 S14 TI SES  
54  
55 S13 AB (sociodemographic or socio demographic or income or wealth or poverty  
56 or affluen\*)  
57  
58  
59  
60

1  
2 S12 TI (sociodemographic or socio demographic or income or wealth or poverty or  
3 affluen\*)  
4

5 S11 AB ((social or socio economic or socioeconomic or economic or income) N4  
6 (deprivat\* or advantage\* or disadvantage\* or disparit\* or status or class or position or  
7 hierach\* or determinant\* or inequalit\* or inequit\* or barrier\* or circumstance\*))  
8  
9

10 S10 TI ((social or socio economic or socioeconomic or economic or income) N4  
11 (deprivat\* or advantage\* or disadvantage\* or disparit\* or status or class or position or  
12 hierach\* or determinant\* or inequalit\* or inequit\* or barrier\* or circumstance\*))  
13  
14

15 S9 (MH "Economic Status")  
16

17 S8 (MH "Poverty Areas")  
18

19 S7 (MH "Poverty+")  
20

21 S6 (MH "Healthcare Disparities")  
22

23 S5 (MH "Health Status Disparities")  
24

25 S4 (MH "Social Class+")  
26

27 S3 (MH "Unemployment")  
28

29 S2 (MH "Employment+")  
30

31 S1 (MH "Socioeconomic Factors+")  
32  
33  
34  
35  
36  
37  
38  
39  
40  
41  
42  
43  
44  
45  
46  
47  
48  
49  
50  
51  
52  
53  
54  
55  
56  
57  
58  
59  
60

## Supplementary Material 2. Scoping Review Data Extraction Tool

Adapted from the JBI Scoping Review Data Extraction tool<sup>20</sup>

| Scoping Review Details                                                               |                                                                                                                                                                                                                                                                                                                                                                                                          |
|--------------------------------------------------------------------------------------|----------------------------------------------------------------------------------------------------------------------------------------------------------------------------------------------------------------------------------------------------------------------------------------------------------------------------------------------------------------------------------------------------------|
| <b>Scoping Review title:</b>                                                         | Health Professionals implicit bias of patients with low socioeconomic status (SES) and its effects on clinical decision-making: A Systematic Scoping Review                                                                                                                                                                                                                                              |
| <b>Review objective/s:</b>                                                           | To scope the reported impact of HP bias about SES on clinical decision making and its effect on the care for people with lower SES in wider literature                                                                                                                                                                                                                                                   |
| <b>Review question/s:</b>                                                            | <ul style="list-style-type: none"> <li>• RQ1: What has been published about implicit SES bias and HP attitudes or behaviours when deciding/providing care.</li> <li>• RQ2: How does SES effect the dynamics of the HP and patient relationship?</li> <li>• RQ3: What recommendations for practice have been postulated, implemented, or evaluated to address HP implicit bias related to SES.</li> </ul> |
| Inclusion/Exclusion Criteria                                                         |                                                                                                                                                                                                                                                                                                                                                                                                          |
| <b>Population:</b> Adults                                                            |                                                                                                                                                                                                                                                                                                                                                                                                          |
| <b>Concept:</b> SES                                                                  |                                                                                                                                                                                                                                                                                                                                                                                                          |
| <b>Context:</b> HP decision making                                                   |                                                                                                                                                                                                                                                                                                                                                                                                          |
| <b>Types of publication or evidence source</b>                                       |                                                                                                                                                                                                                                                                                                                                                                                                          |
| Evidence source Details and Characteristics                                          |                                                                                                                                                                                                                                                                                                                                                                                                          |
| <b>Citation details (e.g., author/s, date, title, journal, volume, issue, pages)</b> |                                                                                                                                                                                                                                                                                                                                                                                                          |
| <b>Country</b>                                                                       |                                                                                                                                                                                                                                                                                                                                                                                                          |
| <b>Context – professional group</b>                                                  |                                                                                                                                                                                                                                                                                                                                                                                                          |
| <b>Disease group (if applicable)</b>                                                 |                                                                                                                                                                                                                                                                                                                                                                                                          |
| <b>Participants (details e.g., age/sex and number)</b>                               |                                                                                                                                                                                                                                                                                                                                                                                                          |
| <b>SES Terminology used.</b>                                                         |                                                                                                                                                                                                                                                                                                                                                                                                          |
| Details/Results extracted from source of evidence                                    |                                                                                                                                                                                                                                                                                                                                                                                                          |
| <b>SES effect on HP and patient relationship</b>                                     |                                                                                                                                                                                                                                                                                                                                                                                                          |

|                                                                                                                                                                          |  |
|--------------------------------------------------------------------------------------------------------------------------------------------------------------------------|--|
| <p><b>Implicit biases, attitudes or behaviours that connect SES and decision making</b></p>                                                                              |  |
| <p><b>Healthcare professionals' decision making, and the impact of the decisions made</b><br/> <b>Types of Healthcare professionals, care context and/or setting</b></p> |  |
| <p><b>Recommendations for practice to mitigate bias</b></p>                                                                                                              |  |
| <p><b>Identify how SES was measured in the included papers.</b></p>                                                                                                      |  |

For peer review only

1  
2  
3  
4  
5  
6  
7  
8  
9  
10  
11  
12  
13  
14  
15  
16  
17  
18  
19  
20  
21  
22  
23  
24  
25  
26  
27  
28  
29  
30  
31  
32  
33  
34  
35  
36  
37  
38  
39  
40  
41  
42  
43  
44  
45  
46  
47  
48  
49  
50  
51  
52  
53  
54  
55  
56  
57  
58  
59  
60



Table 3 Paper Characteristics

|   | <b>Author(s)<br/>date<br/>Country</b> | <b>Type of Publication<br/>Research<br/>design/method<br/>(If applicable)</b>                                                                | <b>Aim(s)<br/>(If stated)</b>                                                                                                             | <b>Population<br/>Professional<br/>Specialty</b>           | <b>Concept<br/>SES Measure</b>                                                                                                                                     | <b>Context<br/>Link HP<br/>Bias &amp;<br/>Decision-<br/>making</b> | <b>Key results, findings, or information</b>                                                                                                                                                                                                                                                                                                                                                                                                             |
|---|---------------------------------------|----------------------------------------------------------------------------------------------------------------------------------------------|-------------------------------------------------------------------------------------------------------------------------------------------|------------------------------------------------------------|--------------------------------------------------------------------------------------------------------------------------------------------------------------------|--------------------------------------------------------------------|----------------------------------------------------------------------------------------------------------------------------------------------------------------------------------------------------------------------------------------------------------------------------------------------------------------------------------------------------------------------------------------------------------------------------------------------------------|
| 1 | Crane (1975)<br>USA                   | <b>Research Paper</b><br>Vignette case studies<br>and Questionnaire                                                                          | To assess the<br>appropriateness of<br>social as compared to<br>physiological criteria in<br>deciding to treat<br>critically ill patient. | <b>Doctors</b><br>Internal<br>Medicine and<br>Neurosurgery | Case studies based on<br>occupation and employment. A<br>Banker and an unemployed<br>Labourer.                                                                     | <b>Yes</b>                                                         | Doctors did differentiate between a patient with a high and low status<br>occupation when making decisions about the aggressiveness of treatment<br>offered. However, when asked to rank the relative influence of social<br>characteristics upon their decisions to treat chronically ill patients, they<br>ranked social criteria as having a low influence on their decision-making.                                                                  |
| 2 | Eisenberg (1979)<br>USA               | <b>Editorial/Comment</b><br>NA                                                                                                               | Sociologic Influences<br>on Decision-Making by<br>Clinicians                                                                              | <b>Doctors</b><br>Specialism<br>not<br>specified.          | This paper reviews the<br>contributions to our<br>understanding of sociologic<br>influences on clinical decision-<br>making.                                       | <b>NA</b>                                                          | The bulk of the available literature implies a significant relation between<br>social class and decisions regarding patient management. Further<br>investigation is needed- various methods of sociologic research could be<br>used to provide the data for these studies e.g., participant observation,<br>record review, questionnaires, interviews, case studies, or direct recording<br>of the interaction.                                          |
| 3 | MacCormick et<br>al (1990)<br>Canada  | <b>Research Paper</b><br>Vignette – Four clinical<br>scenarios                                                                               | To assess decision-<br>making in cancer<br>treatments using age<br>and SES as<br>independent variables.                                   | <b>Medical<br/>Students</b>                                | Occupation and employment<br>were used as a proxy for SES. In<br>this study SES was assessed<br>with age. and it is difficult to<br>separate these in the results. | <b>Yes</b>                                                         | Personal bias of the physician plays a role in decision-making about<br>treatment for cancer in these vignettes. It is difficult to separate age and<br>SES these in the results.<br>Statistically significant differences $p < 0.001$ in decisions to treat younger<br>professional than older persons.<br>Statistically significant differences $p < 0.001$ in decisions to treat a young<br>mother than a young female “mentally handicapped” person. |
| 4 | Brown (1993)<br>USA                   | <b>Research Paper</b><br>Interviews and focus<br>groups. seventy-two<br>health, social work,<br>administrative research,<br>and advocacy HPs | Exploration of class and<br>confidentiality for<br>mothers with HIV.                                                                      | <b>Multi-<br/>professional<br/>Obstetrics:</b>             | Income                                                                                                                                                             | <b>Yes</b>                                                         | Lower social class people not viewed as holding their confidentiality as a<br>personal priority - it matters less to them.<br>Mums with greater authority due to income, political or social standings can<br>expect greater confidentiality compared to mothers who are less<br>economically fortunate.                                                                                                                                                 |
| 5 | McKinlay et al<br>(1996)<br>USA       | <b>Research Paper</b><br>Vignette video scenarios<br>1. Chest pain<br>2. Dyspnoea                                                            | To assess non-medical<br>influences on decision-<br>making.                                                                               | <b>Doctors</b><br>coronary<br>heart<br>disease.            | socioeconomic status, and<br>health insurance coverage.                                                                                                            | <b>Yes</b>                                                         | A link found between insurance coverage on cardiac diagnosis for chest<br>pain, particularly in the older patients. Intersectionality with Age.<br>Among the older patients, those with insurance were significantly more<br>likely to receive the primary cardiac diagnosis than those without<br>insurance, whereas among younger patients’ insurance had no effect.                                                                                   |
| 6 | McKinlay et al.<br>(1997)<br>USA      | <b>Research Paper</b><br>Vignette cancer video<br>scenarios involving a<br>breast mass                                                       | To assess non-medical<br>influences on decision-<br>making                                                                                | <b>Doctors</b><br>Breast<br>Cancer                         | Patient characteristics were<br>varied in the videotapes to<br>indicate socioeconomic                                                                              | <b>Yes</b>                                                         | Women of lower SES were more likely to receive less aggressive care<br>( $p < 0.07$ ). physicians recommended either chemotherapy or tamoxifen to<br>73% of higher SES women, compared with 53% of lower SES women.                                                                                                                                                                                                                                      |

| Author(s)<br>date<br>Country               | Type of Publication<br>Research<br>design/method<br>(If applicable)                                                     | Aim(s)<br>(If stated)                                                                                                                                                                                                          | Population<br>Professional<br>Specialty           | Concept<br>SES Measure                                                                                                                                                                                                                                                                                                                                                                                                                                                                                                            | Context<br>Link HP<br>Bias &<br>Decision-<br>making | Key results, findings, or information                                                                                                                                                                                                                                                                                                           |
|--------------------------------------------|-------------------------------------------------------------------------------------------------------------------------|--------------------------------------------------------------------------------------------------------------------------------------------------------------------------------------------------------------------------------|---------------------------------------------------|-----------------------------------------------------------------------------------------------------------------------------------------------------------------------------------------------------------------------------------------------------------------------------------------------------------------------------------------------------------------------------------------------------------------------------------------------------------------------------------------------------------------------------------|-----------------------------------------------------|-------------------------------------------------------------------------------------------------------------------------------------------------------------------------------------------------------------------------------------------------------------------------------------------------------------------------------------------------|
|                                            |                                                                                                                         |                                                                                                                                                                                                                                |                                                   | status: dress, grammatical style, and insurance status                                                                                                                                                                                                                                                                                                                                                                                                                                                                            |                                                     | Insurance and ability to pay also were associated with disparity in physician recommendations.                                                                                                                                                                                                                                                  |
| 7<br>Feldman et al<br>1997<br>ML...<br>USA | <b>Research Paper</b><br>An Experimental<br>Technique Using<br>Videotapes, Factorial<br>Design, and Survey<br>Sampling. | To assess non-medical<br>influences on decision-<br>making.                                                                                                                                                                    | <b>Doctors</b><br>Secondary<br>care               | Challenging to ascertain how<br>SES was measured or<br>described                                                                                                                                                                                                                                                                                                                                                                                                                                                                  | <b>No</b>                                           | The data suggest that the physician subjects gave clinically valid answers to the questions and that the variations in clinical decision-making identified by the factorial experiment can be interpreted as generalizable differences.                                                                                                         |
| 8<br>Wolder-Leven et al<br>1998<br>USA     | <b>Editorial/Comment</b><br>Social Class and<br>Medical Decision-<br>making                                             | People of different<br>classes may receive<br>differential treatment<br>from providers for the<br>same health conditions<br>due to discrimination<br>based on class.                                                           | <b>Doctors</b><br>Specialism<br>not<br>specified. | Paper discusses SES measures<br>- as indicators of class. The<br>word class works as a<br>shorthand to refer to a person's<br>social location, a "lived<br>reality," in which life chances,<br>values, health and well-being,<br>morbidity and mortality, and<br>concepts of self, other, and<br>collectively are shaped by the<br>relationship of the individual to<br>the social organization of<br>production. Should stop trying<br>to define class in terms of a set<br>of socioeconomic indicators<br>such as income level. | <b>NA</b>                                           | it is important to recognize that giving people the same choices about medical treatments does not necessarily mean that they are being treated equally, because patients do not lead equal lives.<br>At the point of medical decision-making it becomes clear that class-based differences can even lead to difference between life and death. |
| 9<br>Parens 1998<br>USA                    | <b>Editorial/Comment</b><br>Social Class and<br>Medical Decision-<br>making.                                            | Bioethicists often<br>discuss issues of social<br>class in relation to<br>access to health<br>services - bioethics<br>literature reveals that<br>class is rarely a focus<br>in the analysis of<br>medical decision-<br>making. | <b>Doctors</b><br>Specialism<br>not<br>specified. | Considering a person's SES<br>might lead to not offering<br>treatment to a person who<br>does not have the resources<br>and only offering it to people<br>with those resources. An<br>understanding of class and its<br>relationship to medical<br>decision-making should be<br>used to provide equity and not<br>to explain away unwarranted<br>variations in care.                                                                                                                                                              | <b>NA</b>                                           | Health care providers need to listen to patients in unaccustomed ways, the next and much bigger step will be to think systematically about how to promote such listening particularly with time constraints on health professionals.                                                                                                            |

| Author(s)<br>date<br>Country      | Type of Publication<br>Research<br>design/method<br>(If applicable)                                                       | Aim(s)<br>(If stated)                                                                                                                   | Population<br>Professional<br>Specialty    | Concept<br>SES Measure                                                                                                                                 | Context<br>Link HP<br>Bias &<br>Decision-<br>making | Key results, findings, or information                                                                                                                                                                                                                                                                                                                                                                                                                                                                                                                                                  |
|-----------------------------------|---------------------------------------------------------------------------------------------------------------------------|-----------------------------------------------------------------------------------------------------------------------------------------|--------------------------------------------|--------------------------------------------------------------------------------------------------------------------------------------------------------|-----------------------------------------------------|----------------------------------------------------------------------------------------------------------------------------------------------------------------------------------------------------------------------------------------------------------------------------------------------------------------------------------------------------------------------------------------------------------------------------------------------------------------------------------------------------------------------------------------------------------------------------------------|
| 10 Krupat et al 1999<br>USA       | Research Paper<br>Vignette – Video                                                                                        | To determine whether assertive patient behaviour influences physician decision-making in the treatment of older breast cancer patients. | Doctors<br>Cancer                          | Socioeconomic status [as well as age, race, mobility, general health, and assertive behaviour] of the patients were varied.                            | Yes                                                 | Assertive behaviour on behalf of a women with lower SES helps them to get testing e.g., auxiliary node biopsy. Assertiveness led to more careful diagnostic testing for patients who came from groups that are "disadvantaged."                                                                                                                                                                                                                                                                                                                                                        |
| 11 Gordon et al<br>2000<br>USA    | Research Paper<br>Cross-sectional study design, interviews using semi-structured questionnaire of physicians and patents. | An assessment of Patient-Nephrologist discussions about kidney transplantation as a treatment option                                    | Doctors<br>Haemodialysis and Nephrologists | SES determined by education level, occupational level, and socioeconomic status level. All low to high rated.                                          | Yes                                                 | Bias is not overtly discussed however finding show fewer medical explanations and less time spent with patients of Low SES. Patient age and socioeconomic status influence discussions of transplantation as a treatment option. low socioeconomic status patients were less likely to report being encouraged even after adjustment for transplant suitability.                                                                                                                                                                                                                       |
| 12 Van-Ryn et al<br>2000<br>USA   | Research Paper<br>Survey data examined                                                                                    | The degree to which patient race and socioeconomic status effects physicians' perceptions of patients                                   | Doctors<br>post-angiogram care.            | A three-category measure of SES was developed. The SES index was created by standardizing patient income and education and averaging the two together. | Yes                                                 | Intersectionality with race is difficult to unpick. Low SES patients viewed as less likely to be pleasant and rationale. physicians gave lower SES patients more negative ratings on personality characteristics (lack of self-control, irrationality) and level of intelligence.                                                                                                                                                                                                                                                                                                      |
| 13 McKinlay et al<br>2002<br>USA  | Research Paper<br>Vignette video study<br>1. Polymyalgia<br>2. Depression                                                 | To assess the influence of non-medical factors on decision-making.                                                                      | Doctors<br>Internalist and primary care    | SES depicted by appearance and employment in the video vignettes                                                                                       | No                                                  | SES of the patient does not show any impact on decision-making.                                                                                                                                                                                                                                                                                                                                                                                                                                                                                                                        |
| 14 Tamayo-Sarver<br>(2003)<br>USA | Research Paper<br>Vignette<br>1. Ankle Fracture<br>2. Migraine<br><br>Non-traumatic back pain.                            | To measure the Effect of Race/Ethnicity and Desirable Social Characteristics on Physicians Decisions to Prescribe Opioid Analgesics     | Doctors<br>Emergency Department            | Occupation and/or relationship with a primary care provider.                                                                                           | Yes                                                 | Race did not impact on prescribing differences. SES and information about patient social desirability (e.g., occupation) increased the rates of prescribing for the migraine and back pain patient vignette, but this did not alter the rate for ankle fracture. There were statistically discernible increases in the rate of prescribing, 4% (p<0.04) for migraine and 6% (p<0.01) for back pain. The information on socially desirable characteristics may have affected physicians' perceived likelihood that the patient is feigning illness and surreptitiously seeking opioids. |

|    | <b>Author(s)<br/>date<br/>Country</b> | <b>Type of Publication<br/>Research<br/>design/method<br/>(If applicable)</b>                       | <b>Aim(s)<br/>(If stated)</b>                                                                                                  | <b>Population<br/>Professional<br/>Specialty</b> | <b>Concept<br/>SES Measure</b>                                                                                                                                                                                                                                                                        | <b>Context<br/>Link HP<br/>Bias &amp;<br/>Decision-<br/>making</b> | <b>Key results, findings, or information</b>                                                                                                                                                                                                                                                                                            |
|----|---------------------------------------|-----------------------------------------------------------------------------------------------------|--------------------------------------------------------------------------------------------------------------------------------|--------------------------------------------------|-------------------------------------------------------------------------------------------------------------------------------------------------------------------------------------------------------------------------------------------------------------------------------------------------------|--------------------------------------------------------------------|-----------------------------------------------------------------------------------------------------------------------------------------------------------------------------------------------------------------------------------------------------------------------------------------------------------------------------------------|
| 15 | Henley et al 2004<br>USA              | <b>Editorial/Comment</b><br>10 steps for avoiding health disparities in your practice               | Discussion about disparities and health inequalities.                                                                          | <b>Doctors</b><br>Specialism not specified.      | Discusses intersectionality. The evidence regarding differences in the care of patients based on race, ethnicity, gender, and socioeconomic status suggests that if this patient is a woman or African American or from a lower socioeconomic class, resultant morbidity or mortality will be higher. | <b>NA</b>                                                          | Recommends that minimising the effect of bias and stereotyping could be achieved for all patients by using evidence-based practice guidelines.                                                                                                                                                                                          |
| 16 | Manderbacka 2005<br>Finland           | <b>Research Paper</b><br>Exploratory qualitative study                                              | Trace key points in the treatment where patients gender & SES experience differences                                           | <b>Doctors</b><br>Coronary heart disease.        | Blue-collar and white-collar occupations                                                                                                                                                                                                                                                              | <b>Yes</b>                                                         | There was a doctor-centred model common among blue-collar workers and an increased patient centred model with shared decision-making common among those using private care 'white collar occupations. The utilization of private care is clearly concentrated in higher socioeconomic groups in Finland.                                |
| 17 | Arber et al 2006<br>UK                | <b>Research Paper</b><br>A video-simulation experiment. Conducted simultaneously in both USA and UK | Patient characteristics and inequalities in doctors' diagnostic and management strategies relating to CHD.                     | <b>Doctors</b><br>Coronary heart disease         | SES indicated by occupation and dress - middle class (schoolteacher) or working class (cleaner in UK; janitor in US). Class was also expressed by style of dress and appearance.                                                                                                                      | <b>No</b>                                                          | Class was not significantly associated with any aspect of doctors' information gathering or decision-making.                                                                                                                                                                                                                            |
| 18 | Barnhart et al 2006<br>USA            | <b>Research Paper</b><br>Questionnaires developed from focus groups.                                | Can Non-medical Factors Contribute to Disparities in Coronary Heart disease treatments.                                        | <b>Doctors</b><br>coronary heart disease         | socioeconomic status discussed in terms of finance barriers - social support (ability/insurance to pay for a revascularization procedure) as judged by the physician.                                                                                                                                 | <b>Yes</b>                                                         | People with low SES were not trusted by the physician. Patients most knowledgeable (and assertive) about the procedure, and those with resources, who were most likely to adopt a healthy lifestyle (as perceived by the physician) are most likely to receive recommendations for revascularisation.                                   |
| 19 | Denburg et al 2006<br>USA             | <b>Research Paper</b><br>Randomised, 2X2 factorial design clinical vignette.                        | The Influence of Patient Race and Social Vulnerability on Urologist Treatment Recommendations in Localized Prostate Carcinoma. | <b>Doctors</b><br>Cancer                         | Middle income (and married) Low Income (and widowed) therefore the variables were not distinct.                                                                                                                                                                                                       | <b>Yes</b>                                                         | Watchful waiting offered more frequently for socially vulnerable patients (low income and widowed) - both white and black patients. Intersectionality means that low income/widowed black patients received the lowest referral for radical prostatectomy. Low income/widowed white men also received lower referral for prostatectomy. |

|    | <b>Author(s)<br/>date<br/>Country</b> | <b>Type of Publication<br/>Research<br/>design/method<br/>(If applicable)</b>                                                                                                                                                                          | <b>Aim(s)<br/>(If stated)</b>                                                                                                                                                                                                                                                                                                  | <b>Population<br/>Professional<br/>Specialty</b>      | <b>Concept<br/>SES Measure</b>                                                                                                                                  | <b>Context<br/>Link HP<br/>Bias &amp;<br/>Decision-<br/>making</b> | <b>Key results, findings, or information</b>                                                                                                                                                                                                                                                                                                                                |
|----|---------------------------------------|--------------------------------------------------------------------------------------------------------------------------------------------------------------------------------------------------------------------------------------------------------|--------------------------------------------------------------------------------------------------------------------------------------------------------------------------------------------------------------------------------------------------------------------------------------------------------------------------------|-------------------------------------------------------|-----------------------------------------------------------------------------------------------------------------------------------------------------------------|--------------------------------------------------------------------|-----------------------------------------------------------------------------------------------------------------------------------------------------------------------------------------------------------------------------------------------------------------------------------------------------------------------------------------------------------------------------|
| 20 | Bernheim et al<br>2008<br>USA         | <b>Research Paper</b><br>A Qualitative Study semi<br>structured interviews                                                                                                                                                                             | Influence of Patients’<br>Socioeconomic Status<br>on Clinical<br>Management<br>Decisions.                                                                                                                                                                                                                                      | <b>Doctors</b><br>Primary care                        | As described by the<br>participants: Economic<br>Uninsured - Unemployed- On<br>welfare- Sociocultural- Low<br>educational achievement- Poor<br>social networks. | <b>Yes</b>                                                         | All physicians recounted circumstances in which the patient’s SES did<br>affect their clinical management decisions. Even physicians who initially<br>asserted that all patients in their practice received identical care later<br>described differences based on patient SES.                                                                                             |
| 21 | Eggleston et al 2008<br>USA           | <b>Research Paper</b><br>Video recorded<br>outpatient interactions<br>during which<br>oncologists invited<br>patients to participate in<br>clinical trials.                                                                                            | Oncologists’<br>recommendations of<br>clinical trial<br>participation to patients                                                                                                                                                                                                                                              | <b>Doctors</b><br>cancer                              | SES determined by education:<br>high school or less<br>technical or trade school<br>college or greater.                                                         | <b>No</b>                                                          | Data showed that people with higher education (0.07) received more<br>recommendations than men and those with lower education. This was not<br>statistically significant.                                                                                                                                                                                                   |
| 22 | Ling Fan et al<br>2008<br>USA         | <b>Review</b><br>A search of the Internet<br>identified thousands of<br>Web sites, documents,<br>reports, and educational<br>materials pertaining to<br>health and pain<br>disparities.                                                                | Awareness and Action<br>for Eliminating Health<br>Care Disparities in Pain<br>Care: Web-Based                                                                                                                                                                                                                                  | <b>Multi-<br/>professional</b><br>Palliative<br>care. | Paper discusses SES                                                                                                                                             | <b>NA</b>                                                          | Studies have explored the factors influencing the often-unintentional<br>pervasive nature of biases and stereotyping that affect treatment decisions<br>for managing pain. Discriminatory practices that are deep seated in biases,<br>stereotypes, and uncertainties around communication and decision-<br>making processes contributing to inequities in care.            |
| 23 | Franks et al 2008<br>USA              | <b>Editorial/Comment</b><br>This paper examines a<br>hierarchy of three<br>domains for<br>interventions to address<br>health inequalities<br>downstream.<br>1. health system<br>2. provider-patient<br>interactions<br>3. clinical decision-<br>making | Upstream or<br>fundamental causes<br>(such as poverty,<br>limited education, and<br>compromised<br>healthcare access) is<br>essential to reduce<br>healthcare disparities.<br>But such approaches<br>are not sufficient, and<br>downstream<br>interventions,<br>addressing the<br>consequences of those<br>fundamental causes. | <b>Doctors</b><br>Specialism<br>not<br>specified.     | Paper discusses SES                                                                                                                                             | <b>NA</b>                                                          | Physician biases likely to contribute to disparities. Greater social and<br>cultural distance between providers and patients increases the potential for<br>suboptimal encounters. Patients at greater social risk for adverse health<br>outcomes have encounters characterized by<br>less patient participation and providers viewing those encounters more<br>negatively. |

| Author(s)<br>date<br>Country              | Type of Publication<br>Research<br>design/method<br>(If applicable)                                                                                                                                                               | Aim(s)<br>(If stated)                                                                                                                                                                                                                                                                 | Population<br>Professional<br>Specialty                    | Concept<br>SES Measure                                                                                                                                                                                                      | Context<br>Link HP<br>Bias &<br>Decision-<br>making | Key results, findings, or information                                                                                                                                                                                                                                                                                              |
|-------------------------------------------|-----------------------------------------------------------------------------------------------------------------------------------------------------------------------------------------------------------------------------------|---------------------------------------------------------------------------------------------------------------------------------------------------------------------------------------------------------------------------------------------------------------------------------------|------------------------------------------------------------|-----------------------------------------------------------------------------------------------------------------------------------------------------------------------------------------------------------------------------|-----------------------------------------------------|------------------------------------------------------------------------------------------------------------------------------------------------------------------------------------------------------------------------------------------------------------------------------------------------------------------------------------|
| 24<br>Nampiaparampil<br>et al 2009<br>USA | <b>Research Paper</b><br>Vignette - double-<br>blinded randomized<br>controlled study. 1.<br>patient with chronic low<br>back. 2. lower extremity<br>pain                                                                         | To assess the<br>contribution of non-<br>medical decision-<br>making to the<br>assessment and<br>management of pain.                                                                                                                                                                  | <b>Doctors</b><br>rehabilitation<br>community<br>hospitals | Medical insurance<br>Blue Cross Vs Medicaid                                                                                                                                                                                 | <b>Yes</b>                                          | Unable to unpick race and insurance status in these vignette examples.<br>Patient ethnicity/SES differences in the prescription of morphine (p = 0.053).<br>Patient ethnicity/SES significantly affected the rate of referral for a nerve<br>block (P = 0.04).                                                                     |
| 25<br>Wilson 2009<br>UK                   | <b>Research Paper</b><br>Vignette – case<br>scenarios.<br>One of two patient<br>scenarios was employed<br>in a self-administered<br>questionnaire                                                                                 | Scenarios and<br>Questionnaires<br>addressed pain<br>knowledge, inferences<br>of physical pain,<br>general attitudes, and<br>beliefs about pain<br>management. The<br>participants were<br>required to identify the<br>patient's pain level and<br>make pain<br>management decisions. | <b>Nurses</b><br>pain                                      | The variable lifestyle/socio-<br>economic status (SES) of the<br>patient was manipulated; all<br>other patient variables were<br>kept constant.<br>High SES - businessperson<br>Low SES - unemployed<br>construction worker | <b>Yes</b>                                          | There was a difference in pain management between high and low SES<br>patients - both general and CNS nurses showed inferences of patient pain<br>and management decisions which are based on myths about Low SES<br>addiction. There was an observed trend to be more likely to under medicate<br>low SES over high SES patients. |
| 26<br>Ceballo et al<br>2010<br>USA        | <b>Research Paper</b><br>A three-page survey was<br>mailed to physicians in<br>one state.<br>Case scenario of a<br>young women trying to<br>get pregnant.<br>The patient's race and<br>social class varied<br>across the surveys. | Surveyed about their<br>knowledge of infertility<br>among different<br>demographic groups of<br>women and examines<br>how patient and<br>physician<br>characteristics may<br>influence physicians'<br>treatment responses to<br>hypothetical infertile<br>patients.                   | <b>Doctors</b><br>Family<br>planning                       | Different educational groups<br>were used to reflect social<br>class differences among<br>women.                                                                                                                            | <b>No</b>                                           | Referral practices did vary related to insurance status of the patient.<br>Physicians' reluctance to refer Medicaid patients to infertility specialists is<br>explained as understandable given the great expense of specialized<br>infertility services and the lack of Medicaid insurance coverage for such<br>services.         |

| Author(s)<br>date<br>Country                           | Type of Publication<br>Research<br>design/method<br>(If applicable)                                                                                             | Aim(s)<br>(If stated)                                                                                                                                                                                             | Population<br>Professional<br>Specialty     | Concept<br>SES Measure                                           | Context<br>Link HP<br>Bias &<br>Decision-<br>making | Key results, findings, or information                                                                                                                                                                                                                                                                                                                                                                                                                                                                                                                                                                                                                |
|--------------------------------------------------------|-----------------------------------------------------------------------------------------------------------------------------------------------------------------|-------------------------------------------------------------------------------------------------------------------------------------------------------------------------------------------------------------------|---------------------------------------------|------------------------------------------------------------------|-----------------------------------------------------|------------------------------------------------------------------------------------------------------------------------------------------------------------------------------------------------------------------------------------------------------------------------------------------------------------------------------------------------------------------------------------------------------------------------------------------------------------------------------------------------------------------------------------------------------------------------------------------------------------------------------------------------------|
| 27<br>Gilbert et al 2010<br>Canada                     | <b>Research Paper</b><br>A retrospective cohort study of women with a previous Caesarean section.                                                               | Does Education Level Influence the Decision to Undergo Elective Repeat Caesarean Section Among Women with a Previous Caesarean Section.                                                                           | <b>Doctors</b><br>Obstetrics                | Education level was stratified.                                  | <b>Yes</b>                                          | Higher education is associated with an increased rate of elective repeat Caesarean section (p<0.047 and p<0.03). Whether this is due to patient differences or physician bias, physicians should be aware of this disparity and should attempt to provide unbiased informed consent for all women                                                                                                                                                                                                                                                                                                                                                    |
| 28<br>Hajjaj et al 2010<br>UK                          | <b>Research Paper</b><br>Semi-structured qualitative interviews were conducted with clinicians working in departments of dermatology                            | Assessment of nonclinical influences, beyond diagnosis and severity, on clinical decision-making in dermatology.                                                                                                  | <b>Doctors</b><br>Dermatology               | Education level and financial status and treatment related costs | <b>Yes</b>                                          | This paper does not offer a strong link between SES and decision-making. Sixty five percent of clinicians said that treatment-related costs that patients are likely to incur would sometimes influence their decision-making inability to afford transportation costs or cost of child minding at home. 19.6% clinicians raised education/intelligence as an issue especially relating to cases where systemic treatments with potential side-effects are required. Where there is a lack of awareness or understanding of the range of influences, there is a risk that some influences may *subconsciously* adversely impact on optimal decision. |
| 29<br>Kristine Bærøe and Berit Bringeda 2011<br>Norway | <b>Editorial/Comment</b><br>A discussion about the conditions for acceptable and unacceptable priority settings with respect to patients' socioeconomic status. | The pattern is equal in all countries, the higher the socioeconomic status (SES) of patients, the better the health and the higher the life expectancy; health prospects are distributed along a social gradient. | <b>Doctors</b><br>Specialism not specified. | Paper discussed SES                                              | <b>NA</b>                                           | Health inequity in healthcare services by inaccurate interpretations of 'healthcare need' and biased care due to unconscious influence by patients' SES. Prioritisation of health need according to SES as a basis of equity is not ethical. Socioeconomic Factors and their impact on health should be forefront of HP thinking - raising awareness in order to prevent reinforcement of health inequity.                                                                                                                                                                                                                                           |
| 30<br>Detsky 2010<br>USA                               | <b>Editorial/Comment</b><br>HP provide services and make decisions about diagnostics, treatments, procedures etc. There are variations.                         | The paper discusses...<br>... GPs and surgeons are biased against women, people from low SES groups, and other minority groups?                                                                                   | <b>Doctors</b><br>Specialism not specified. | Paper discussed SES                                              | <b>NA</b>                                           | Unintentional bias, which is far more common than intentional corruption, is particularly worrisome because humans are facile with rationalizing and often are not even aware of their bias. It is difficult to overcome bias that one does not even know is there.                                                                                                                                                                                                                                                                                                                                                                                  |

|    | Author(s)<br>date<br>Country  | Type of Publication<br>Research<br>design/method<br>(If applicable)                                                                                                               | Aim(s)<br>(If stated)                                                                                                                                                                                                                          | Population<br>Professional<br>Specialty          | Concept<br>SES Measure                                                                                                                                                                                                                        | Context<br>Link HP<br>Bias &<br>Decision-<br>making | Key results, findings, or information                                                                                                                                                                                                                                                                                                                                                                                                                                                                                                                                     |
|----|-------------------------------|-----------------------------------------------------------------------------------------------------------------------------------------------------------------------------------|------------------------------------------------------------------------------------------------------------------------------------------------------------------------------------------------------------------------------------------------|--------------------------------------------------|-----------------------------------------------------------------------------------------------------------------------------------------------------------------------------------------------------------------------------------------------|-----------------------------------------------------|---------------------------------------------------------------------------------------------------------------------------------------------------------------------------------------------------------------------------------------------------------------------------------------------------------------------------------------------------------------------------------------------------------------------------------------------------------------------------------------------------------------------------------------------------------------------------|
| 31 | Paul Dieppe<br>2011<br>UK     | <b>Editorial/Comment</b><br>A discussion about the inequalities in the provision of surgical Interventions for people with Rheumatology conditions.                               | In the context of state provided healthcare - many studies have shown that older people, women, ethnic minorities, and those of lower SES are all likely to receive variations in interventions compared to well-off, middle aged white males. | <b>Doctors</b><br>Rheumatology                   | Paper discussed SES                                                                                                                                                                                                                           | <b>NA</b>                                           | The paper finds significant effects of SES on both hip and knee joint replacement rates for people with Osteoarthritis. It suggests that GPs and surgeons are biased against women, low SES patients, and other minority groups.                                                                                                                                                                                                                                                                                                                                          |
| 32 | Dougal et al 2010<br>USA      | <b>Research Paper</b><br>Online national survey                                                                                                                                   | the influence of SES was examined on psychotherapists cognitive attributions and counter-transferences.                                                                                                                                        | <b>Psychological therapists</b><br>Mental Health | Paper discusses SES                                                                                                                                                                                                                           | <b>Yes</b>                                          | SES impacts on counter-transference reactions and clinical judgments according to SES. Rated interpersonal behaviour of the client with higher SES has evoking feelings of dominance more so than the lower SES. CAS measurement of 'causal attribution' found no statistically significant differences related to clinical judgment                                                                                                                                                                                                                                      |
| 33 | Haider et al 2010<br>USA      | <b>Research Paper</b><br>Clinical vignettes. The survey included the Implicit Association Test (IAT) to assess unconscious preferences                                            | To estimate unconscious race and social class bias among first-year medical students and investigate its relationship with assessment.                                                                                                         | <b>Medical students</b>                          | Social class was depicted using occupation. Patient vocation is commonly used as a proxy for social class. Patient occupations were chosen using the NamPowers occupational prestige scale, which ranks occupations on a scale from 1 to 100. | <b>No</b>                                           | IAT testing showed A preference toward those in the upper class among 174 students (86%). a lower-class preference in 6 (3%). Multivariable analyses for all vignettes found no significant relationship between implicit biases and clinical assessment. Analysis stratified by patient race or class did not demonstrate any statistically significant association between student IAT scores and how students assessed patients for any of the vignettes. No interaction between IAT D scores and vignette patient class (or race) was found for any of the vignettes. |
| 34 | McKinlay et al<br>2012<br>USA | <b>Research Paper</b><br>A factorial experiment using video vignettes was conducted.<br>1. Patient symptoms of diabetes<br>2. Known diabetes with emerging peripheral neuropathy. | To investigate additional causes of health care disparities in the decision-making of primary care doctors.                                                                                                                                    | <b>Doctors</b><br>Primary care                   | Appearance altered to reflect Class. Men presented with collar and tie (upper SES) or plaid shirt and jacket (lower SES). Women presented with either blazer with brooch and makeup (high SES) or sweatshirt and no makeup (lower SES).       | <b>Yes</b>                                          | clinical management (specifically for foot neuropathy) is influenced by patient socioeconomic status (SES). Overall, upper SES patients would receive these essential examinations compared with lower SES patients. Upper SES patients were slightly more likely to be asked questions about their medical history (P < 0.05 for history of eye disease) and were more frequently referred to ophthalmologist (P = 0.024).                                                                                                                                               |



1  
2  
3  
4  
5  
6  
7  
8  
9  
10  
11  
12  
13  
14  
15  
16  
17  
18  
19  
20  
21  
22  
23  
24  
25  
26  
27  
28  
29  
30  
31  
32  
33  
34  
35  
36  
37  
38  
39  
40  
41  
42  
43  
44  
45  
46

| Author(s)<br>date<br>Country             | Type of Publication<br>Research<br>design/method<br>(If applicable)                                                                                                                                                                                                                                                                                                                                                  | Aim(s)<br>(If stated)                                                                                                                      | Population<br>Professional<br>Specialty                                                 | Concept<br>SES Measure                                                                                                                | Context<br>Link HP<br>Bias &<br>Decision-<br>making | Key results, findings, or information                                                                                                                                                                                                                                                                                                                                         |
|------------------------------------------|----------------------------------------------------------------------------------------------------------------------------------------------------------------------------------------------------------------------------------------------------------------------------------------------------------------------------------------------------------------------------------------------------------------------|--------------------------------------------------------------------------------------------------------------------------------------------|-----------------------------------------------------------------------------------------|---------------------------------------------------------------------------------------------------------------------------------------|-----------------------------------------------------|-------------------------------------------------------------------------------------------------------------------------------------------------------------------------------------------------------------------------------------------------------------------------------------------------------------------------------------------------------------------------------|
| 35<br>Shawahna et al<br>2012<br>Pakistan | <b>Research Paper</b><br>Qualitative with two<br>observational phases.<br>Semi-structured<br>interviews - 2 hospitals,<br>2 diabetes care centres<br>and 2 private clinics.<br>Prescriptions were<br>analysed for<br>socioeconomic<br>indicators. In the second<br>phase, the opinions of a<br>panel of prescribers on<br>the influence<br>socioeconomic<br>indicators on<br>prescribing behaviour<br>were elicited. | To investigate<br>physician's<br>perspectives of<br>patients' SES and the<br>important indicators<br>influencing prescribing<br>behaviour. | <b>Doctors</b><br>Diabetes                                                              | participants described SES<br>based on 'job role' and a<br>judgment about whether the<br>person might be able to afford<br>treatment. | <b>Yes</b>                                          | Literacy, educational background, compliance, dress, and appearance<br>were important indicators at the time of clinical decision-making for<br>physicians originating from urban areas. Participating physicians agreed<br>that patient's socioeconomic status influenced their drug prescribing<br>behaviour                                                                |
| 36<br>Smith-oka 2012<br>Mexico           | <b>Research Paper</b><br>Interviews and<br>participant observation                                                                                                                                                                                                                                                                                                                                                   | To investigate Risk –<br>motherhood in a<br>Mexican public<br>hospital.                                                                    | <b>Multi-<br/>professional<br/>Doctors,<br/>Midwives,<br/>and Nurses.</b><br>Obstetrics | Income and area of residence                                                                                                          | <b>Yes</b>                                          | Good mothers are married, knowledgeable, follows norms.<br>Bad mothers are unmarried, uneducated, deviant. These<br>views thought to reflect the paternalistic class structure of Mexican society.<br>Explicit bias of low SES single mothers evident in this research - linked again<br>to cooperation.<br>Pressure for sterilisation Vs the use of an IUD in low SES women. |

| Author(s)<br>date<br>Country      | Type of Publication<br>Research<br>design/method<br>(If applicable)                                                                                                                                                                                                                                                                                                                                                                               | Aim(s)<br>(If stated)                                                                                                                                                                                                         | Population<br>Professional<br>Specialty | Concept<br>SES Measure                                                      | Context<br>Link HP<br>Bias &<br>Decision-<br>making | Key results, findings, or information                                                                                                                                                                                                                                                                                                                                                                                                                                                                                                                                                                                       |
|-----------------------------------|---------------------------------------------------------------------------------------------------------------------------------------------------------------------------------------------------------------------------------------------------------------------------------------------------------------------------------------------------------------------------------------------------------------------------------------------------|-------------------------------------------------------------------------------------------------------------------------------------------------------------------------------------------------------------------------------|-----------------------------------------|-----------------------------------------------------------------------------|-----------------------------------------------------|-----------------------------------------------------------------------------------------------------------------------------------------------------------------------------------------------------------------------------------------------------------------------------------------------------------------------------------------------------------------------------------------------------------------------------------------------------------------------------------------------------------------------------------------------------------------------------------------------------------------------------|
| 37<br>Lay-Yee et al<br>2013<br>NZ | <b>Research Paper</b><br>Sample of 9272<br>encounters at 185 family<br>practices. Each<br>practitioner was asked<br>to provide data on<br>themselves and on their<br>practice, and to report<br>on every fourth of their<br>patients (a 25% sample)<br>in each of two week-long<br>periods separated by an<br>interval of six months.<br>The questionnaire<br>recorded data about the<br>patient, his or her<br>problems and their<br>management. | social disparities in<br>health are pervasive<br>features of health care<br>systems. studying inter-<br>practitioner variation in<br>clinical activity across<br>four payment types in<br>New Zealand primary<br>care system. | <b>Doctors</b><br>Primary Care          | deprivation level - NZ multi-<br>index of deprivation used<br>quintiles 1-5 | <b>Yes</b>                                          | There was greater variability of practitioner decision-making for socially disadvantaged patients found in fee-for service settings. Practitioners may have difficulty processing relevant clinical information for socially disadvantaged patients, and this greater degree of uncertainty may in turn be reflected in more variable decision-making. While there was little evidence in this primary care sample of systematic bias in clinical activity level by patient social group, practitioner variability was much more marked for patients drawn from ethnically and socio-economically disadvantaged background. |
| 38<br>Haider et al 2014<br>USA    | <b>Research Paper</b><br>Participants completed<br>nine clinical vignettes,<br>each with three<br>trauma/acute care<br>surgery management<br>questions.<br>social class IAT<br>assessments were<br>completed by each<br>participant.<br>Multivariable, ordered<br>logistic regression to<br>test IAT on decision-<br>making.                                                                                                                      | To assess Unconscious<br>race and class bias and<br>its association with<br>decision-making by<br>trauma and acute care<br>surgeons                                                                                           | <b>Doctors</b><br>Trauma                | Social class stated in vignette.                                            | <b>No</b>                                           | 90.7% demonstrated an implicit preference toward upper social class persons. Biases were not statistically significantly associated with clinical decision-making So despite high levels of implicit bias this did not alter the decisions made by the physician in a statistically significant way.                                                                                                                                                                                                                                                                                                                        |

| Author(s)<br>date<br>Country  | Type of Publication<br>Research<br>design/method<br>(If applicable)                                                                                                                                                                                                              | Aim(s)<br>(If stated)                                                                                                   | Population<br>Professional<br>Specialty  | Concept<br>SES Measure                                                                                                                                                    | Context<br>Link HP<br>Bias &<br>Decision-<br>making | Key results, findings, or information                                                                                                                                                                                                                                                                                                                                                                                                                                                                                                          |
|-------------------------------|----------------------------------------------------------------------------------------------------------------------------------------------------------------------------------------------------------------------------------------------------------------------------------|-------------------------------------------------------------------------------------------------------------------------|------------------------------------------|---------------------------------------------------------------------------------------------------------------------------------------------------------------------------|-----------------------------------------------------|------------------------------------------------------------------------------------------------------------------------------------------------------------------------------------------------------------------------------------------------------------------------------------------------------------------------------------------------------------------------------------------------------------------------------------------------------------------------------------------------------------------------------------------------|
| 39 Haider et al 2015<br>USA   | <b>Research Paper</b><br>Prospective Vignette study conducted among surgical RNs. Implicit association tests (IATs) for social class and race. Ordered logistic regression                                                                                                       | To assess unconscious Race and Class Biases among Registered Nurses.                                                    | <b>Nurses</b><br>Surgery                 | patients' race or social class were randomly altered. Social class vignettes used patients' occupations as proxies for their social status.                               | <b>No</b>                                           | 93.47% demonstrated an implicit preference toward upper social class persons. Participants were more likely to think that a lower SES with anxiety did not understand the procedure and needed to be re-consented. Intersectionality detected between race and SES and the use of post-surgical restraints and sedation. Implicit biases among RNs did not correlate with clinical decision-making. Presence of an unconscious bias was not associated with any overall differences in vignette-based clinical assessment and decision-making. |
| 40 Haider et al 2015<br>USA   | <b>Research Paper</b><br>Clinical vignettes, each with 3 management questions. Ordered logistic regression analysis on the Implicit Association Test (IAT) scores and used multivariable analysis to determine whether implicit bias was associated with the vignette responses. | To assess the relationship between unconscious bias and clinical decision-making                                        | <b>Doctors</b><br>Surgery                | The paper does not state how SES was communicated via the vignette style study.                                                                                           | <b>No</b>                                           | Although implicit biases of race and social class were present among most of the trauma and acute care clinician respondents, these biases were not associated with clinical decision-making. Clinicians were less likely to order an MRI of the cervical spine for patients with neck tenderness after a motor vehicle crash for low SES patients - this is hypothesised to be linked to health insurance status.                                                                                                                             |
| 41 John-Henderson 2015<br>USA | <b>Editorial/Comment</b><br>Implicit bias of SES discussed along with as implicit bias of race, gender, suicidal ideation, and obesity).                                                                                                                                         | Implicit cognition implications for global health                                                                       | <b>Doctors</b><br>Mental health          | paper discusses the use of the MacArthur SES scale - which is a self-rated 'place a cross on the ladder to indicate your position' scale                                  | <b>NA</b>                                           | Biases and discussed alongside resilience. The paper recommends an investigation into why some HPs make biased decisions and some do not. This could reduce the overall impact of implicit biases on health, both at the level of the individual and by positively affecting the relationship between patient and physician.                                                                                                                                                                                                                   |
| 42 Williams et al 2015<br>USA | <b>Research Paper</b><br>Vignette based study - surveyed seniors at 84 medical schools. two clinically equivalent management options for a set of cardiac patient vignettes. examined variations in student recommendations.                                                     | Investigation of variations in medical student recommendations based on patient race, gender, and socioeconomic status. | <b>Doctors</b><br>coronary heart disease | Patient SES was determined solely by the Hollingshead Occupational Scale and was fixed for each individual vignette but varied across the set of eight cardiac vignettes. | <b>Yes</b>                                          | Patient SES was a strong and significant predictor of student recommendations. With some intersectionality - when the patient was presented as being in the lowest SES group (SES 1-2), students were more likely to recommend procedures for black patients, and least likely to do so for white female patients. Judgmental attitudes from providers, even if not explicitly expressed, negatively affect physician-patient trust.                                                                                                           |

| Author(s)<br>date<br>Country                   | Type of Publication<br>Research<br>design/method<br>(If applicable)                                                                                                                                                                        | Aim(s)<br>(If stated)                                                                                                                                                                                              | Population<br>Professional<br>Specialty       | Concept<br>SES Measure                                                                                                                                                                    | Context<br>Link HP<br>Bias &<br>Decision-<br>making | Key results, findings, or information                                                                                                                                                                                                                                               |
|------------------------------------------------|--------------------------------------------------------------------------------------------------------------------------------------------------------------------------------------------------------------------------------------------|--------------------------------------------------------------------------------------------------------------------------------------------------------------------------------------------------------------------|-----------------------------------------------|-------------------------------------------------------------------------------------------------------------------------------------------------------------------------------------------|-----------------------------------------------------|-------------------------------------------------------------------------------------------------------------------------------------------------------------------------------------------------------------------------------------------------------------------------------------|
| 43<br>Castaneda-Guarderas et al<br>2016<br>USA | <b>Editorial/Comment</b><br>A discussion about shared decision-making with vulnerable Populations in the Emergency Department.                                                                                                             | This paper considers the future research agenda needed to examine shared decision-making with vulnerable populations of people who present to emergency departments in the U.S.                                    | <b>Doctors</b><br>Specialism not specified.   | Discussed in terms of Socioeconomic Disadvantage uneducated unemployed uninsured                                                                                                          | <b>NA</b>                                           | Shared decision-making in the ED setting among patients with socioeconomic challenges may be inhibited by a perceived power differential between physicians and their patients, beyond that experienced by more affluent patients.                                                  |
| 44<br>Elholm Madsen et al 2016<br>Denmark      | <b>Research Paper</b><br>An experimental factorial vignette survey was used. Four different vignettes describing fictitious patient cases with different SES variables were randomly allocated to therapists working in somatic hospitals. | To investigate whether occupational therapists and physiotherapists are influenced by the patient's SES                                                                                                            | <b>Occupational Therapist</b><br>Somatic care | Employment status and educational level were used as a proxy for SES.<br>a white collar-worker (lawyer employed and unemployed)<br>a blue collar-worker (janitor employed or unemployed); | <b>No</b>                                           | There were no statistically significant associations between the patient's SES and the judgements related to the patient's rehabilitation OR the rehabilitation effort given in phase one or towards providing equal treatment in a therapeutic situation.                          |
| 45<br>Popescu et al<br>2016<br>USA             | <b>Research Paper</b><br>Retrospective 1995 - 2007 data collected from the SEER programme. Key interests were race and SES.                                                                                                                | to understand whether between-physician and within physician variations play a role in cancer care disparities among seniors with breast and colorectal cancer enrolled in a national cancer surveillance program. | <b>Doctors</b><br>Cancer                      | Measured SES using patients' zip code median household income, categorized into deciles. SEER files contain several zip code and census tract-level SES variables.                        | <b>Yes</b>                                          | Patients residing in high-income zip codes were more likely to receive treatment than patients residing in low-income zip codes (e.g., 69%, 53%, and 65% top decile income patients received BCS, chemotherapy, and radiation vs. 46%, 48%, and 43% bottom decile income patients). |

|    | <b>Author(s)<br/>date<br/>Country</b>     | <b>Type of Publication<br/>Research<br/>design/method<br/>(If applicable)</b>                                                                                                                                                                                                                                                                                                                                           | <b>Aim(s)<br/>(If stated)</b>                                                                                                                                                                                                                                | <b>Population<br/>Professional<br/>Specialty</b> | <b>Concept<br/>SES Measure</b>            | <b>Context<br/>Link HP<br/>Bias &amp;<br/>Decision-<br/>making</b> | <b>Key results, findings, or information</b>                                                                                                                                                                                                                                                                                                                                                                                                                                                               |
|----|-------------------------------------------|-------------------------------------------------------------------------------------------------------------------------------------------------------------------------------------------------------------------------------------------------------------------------------------------------------------------------------------------------------------------------------------------------------------------------|--------------------------------------------------------------------------------------------------------------------------------------------------------------------------------------------------------------------------------------------------------------|--------------------------------------------------|-------------------------------------------|--------------------------------------------------------------------|------------------------------------------------------------------------------------------------------------------------------------------------------------------------------------------------------------------------------------------------------------------------------------------------------------------------------------------------------------------------------------------------------------------------------------------------------------------------------------------------------------|
| 46 | Fitzgerald et al<br>2017<br>International | <b>Systematic Review</b><br>PubMed, PsychINFO,<br>PsychARTICLE and<br>CINAHL were searched<br>for peer-reviewed<br>articles published<br>between 1st March 2003<br>and 31st March 2013.<br>Two reviewers assessed<br>the eligibility of the<br>identified papers based<br>on precise content and<br>quality criteria. The<br>references of eligible<br>papers were examined<br>to identify further<br>eligible studies. | To assess publications<br>examining implicit bias<br>in healthcare<br>professionals.                                                                                                                                                                         | <b>Multi-<br/>professional</b><br>NA             | SES                                       | <b>Yes</b>                                                         | All studies found evidence for SES implicit biases among physicians and nurses.<br>Class may trump race in some circumstances so that being high SES is more salient than being non-white.<br>Based on the available evidence, physicians, and nurses manifest implicit biases to a similar degree as the general population. Biases also exist for age, mental illness, weight, having AIDS, brain injured patients perceived to have contributed to their injury, intravenous drug users and disability. |
| 47 | Murphy et al<br>2017<br>USA               | <b>Editorial/Comment</b><br>A discussion about<br>socially at-risk<br>populations in relation<br>to health disparities.                                                                                                                                                                                                                                                                                                 | Increasingly, it is<br>recognized that<br>disparities are driven<br>not by differences in<br>biology or individual<br>patient characteristics,<br>but rather by social<br>determinants, or the<br>conditions of the<br>environments in which<br>people live. | <b>Doctor</b><br>Specialism<br>not<br>specified. | Paper discusses<br>socioeconomic position | <b>NA</b>                                                          | Bias manifests itself in behaviours that impede relationship building. Physicians with higher levels of general bias are more likely to talk slowly, have greater verbal dominance, and have less patient-centred dialogue. Implicit bias influences diagnosis, treatment recommendations, questions asked of the patient, and diagnostic tests ordered.                                                                                                                                                   |

|    | <b>Author(s)<br/>date<br/>Country</b> | <b>Type of Publication<br/>Research<br/>design/method<br/>(If applicable)</b>                                                                                                                                                                                                                                                                                             | <b>Aim(s)<br/>(If stated)</b>                                                                                                         | <b>Population<br/>Professional<br/>Specialty</b> | <b>Concept<br/>SES Measure</b>                                                                                                                                                   | <b>Context<br/>Link HP<br/>Bias &amp;<br/>Decision-<br/>making</b> | <b>Key results, findings, or information</b>                                                                                                                                                                                                                                                                                                                                                                                                   |
|----|---------------------------------------|---------------------------------------------------------------------------------------------------------------------------------------------------------------------------------------------------------------------------------------------------------------------------------------------------------------------------------------------------------------------------|---------------------------------------------------------------------------------------------------------------------------------------|--------------------------------------------------|----------------------------------------------------------------------------------------------------------------------------------------------------------------------------------|--------------------------------------------------------------------|------------------------------------------------------------------------------------------------------------------------------------------------------------------------------------------------------------------------------------------------------------------------------------------------------------------------------------------------------------------------------------------------------------------------------------------------|
| 48 | Pettit et al 2017<br>USA              | <b>Research Paper</b><br>High-fidelity simulation - randomly assigned to participate in a simulation of acute coronary syndrome. Students were blinded to study objectives. quantitative data were obtained on the number of times students performed the following patient actions: acknowledged patient by name, asked about pain, conversed, and touching the patient. | To test the effect of socioeconomic status bias on Medical Student-Patient interactions using an Emergency Medicine Simulation.       | <b>Medical<br/>Students</b>                      | Mannequin - low SES depicted by a homeless person - dirt covered t-shirt and trousers. Mannequin - High SES depicted by executive dress - button down collar suit and tie etc.   | <b>Yes</b>                                                         | Data demonstrate that Medical Students were more likely to ask the simulated patient with high SES about pain control ( $p = 0.04$ ) and more likely to touch the low SES patient ( $p = 0.01$ ). Paper discusses touch as a mechanism to communicate compassion - put could also be a display of power. Decision-making does not appear to be different - patient received aspirin and was sent for a cardiac catheterization in both groups. |
| 49 | Goddu et al 2018<br>USA               | <b>Research Paper</b><br>Randomized vignette study of two chart notes employing stigmatizing versus neutral language to describe the same hypothetical patient, a 28-year-old man with sickle cell disease.                                                                                                                                                               | To assess if words matter... to assess if Stigmatizing Language aids in the transmission of Bias in the medical record                | <b>Medical<br/>Students</b>                      | Vignette language portraying the patient negatively with irrelevant or unnecessary indicators of lower socioeconomic status such as hanging out with friends outside McDonald's. | <b>Yes</b>                                                         | Language may play a powerful role in influencing clinician attitudes and behaviour. Less aggressive pain management employed with the hypothetical patient who had low SES.                                                                                                                                                                                                                                                                    |
| 50 | Brandao et al<br>2019<br>Portugal     | <b>Research Paper</b><br>Two experimental Vignette studies                                                                                                                                                                                                                                                                                                                | To investigate classism in pain care and the role of patient socioeconomic status on nurse's pain assessment and management practices | <b>Nurse<br/>Pain</b>                            | SES was manipulated by level of education and occupational activity                                                                                                              | <b>Yes</b>                                                         | Overall, the higher-SES patient was perceived as having more intense pain than the lower-SES patients. The low-SES patient's pain was perceived as less credible than the high-SES patient's pain when distress cues were present. Patient SES influenced some of the nurses' pain assessments but not their management practices.                                                                                                             |

|    | <b>Author(s)<br/>date<br/>Country</b> | <b>Type of Publication<br/>Research<br/>design/method<br/>(If applicable)</b>                                                                                                                                                                    | <b>Aim(s)<br/>(If stated)</b>                                                                                                                                     | <b>Population<br/>Professional<br/>Specialty</b>                             | <b>Concept<br/>SES Measure</b>                                                                                     | <b>Context<br/>Link HP<br/>Bias &amp;<br/>Decision-<br/>making</b> | <b>Key results, findings, or information</b>                                                                                                                                                                                                              |
|----|---------------------------------------|--------------------------------------------------------------------------------------------------------------------------------------------------------------------------------------------------------------------------------------------------|-------------------------------------------------------------------------------------------------------------------------------------------------------------------|------------------------------------------------------------------------------|--------------------------------------------------------------------------------------------------------------------|--------------------------------------------------------------------|-----------------------------------------------------------------------------------------------------------------------------------------------------------------------------------------------------------------------------------------------------------|
| 51 | Gonzales et al<br>2019<br>USA         | <b>Research Paper</b><br>A telephone interviews incorporating Logistic regression models that assessed associations between race/ethnicity/education, medical discrimination, clinician mistrust, and treatment decision-making with concordance | To assess the associations between race/ethnicity/education, medical discrimination, clinician mistrust, and treatment decision-making and guideline concordance. | <b>Doctors</b><br>Cancer                                                     | Education level                                                                                                    | <b>Yes</b>                                                         | Intersectionality. Socioeconomic factors influenced guidelines concordance. They found educational disparities in breast cancer treatment. Non-college-educated Black women had lower odds of guideline-concordant care vs. college-educated White women. |
| 52 | Hirsh et al 2019<br>USA               | <b>Research Paper</b><br>Vignette style study. A randomized controlled trial.                                                                                                                                                                    | To test a virtual perspective-taking intervention to reduce race and SES disparities in pain care                                                                 | <b>Doctors</b><br>Pain                                                       | SES was represented visually by work attire: low SES patients - fast food uniform, and high SES – a business suit. | <b>Yes</b>                                                         | Statistically reliable treatment bias during the pain treatment decision-making pre-intervention. Forty seven percent of providers who were biased at baseline did not show a statistically reliable treatment bias one week later.                       |
| 53 | Vlietstra et al<br>2020<br>UK         | <b>Research Paper</b><br>Vignette – participants randomised to one of two video vignettes. Representing a psychological assessment session with either a ‘lower’ or ‘upper’ class client.                                                        | To assess for SES variations in clinical reasoning, namely diagnosis, risk assessment and treatment, and to measure class self-awareness.                         | <b>Psychological<br/>therapeutic<br/>professionals</b><br>Working in the NHS | Class<br>The accent and dress of the client were varied to elicit class stereotypes.                               | <b>No</b>                                                          | There was little difference in clinical reasoning between the two class conditions. The paper acknowledges that the dress variations did not portray class cues accurately or strongly enough to evoke a difference.                                      |
| 54 | Anastas et al<br>2020<br>USA          | <b>Research Paper</b><br>Vignette - 12 computer-simulated patients with chronic back pain that varied by race and SES (low/high). IAT also employed.                                                                                             | To assess provider attitudes on Chronic Pain Care Decisions.                                                                                                      | <b>Doctors</b><br>pain                                                       | SES was indicated by occupation and depicted by clothing.                                                          | <b>Yes</b>                                                         | Strong implicit preference for high SES over low SES individuals. There were significant race × SES interaction effects on provider ratings of pain interference, distress, and workplace accommodations.                                                 |

| Author(s)<br>date<br>Country                                        | Type of Publication<br>Research<br>design/method<br>(If applicable)                                                                                                                                                                                                                                                                                                                   | Aim(s)<br>(If stated)                                                                                                                                                                                                                                                       | Population<br>Professional<br>Specialty          | Concept<br>SES Measure                                                                                                                                                   | Context<br>Link HP<br>Bias &<br>Decision-<br>making | Key results, findings, or information                                                                                                                                                                                                                                                                                                                         |
|---------------------------------------------------------------------|---------------------------------------------------------------------------------------------------------------------------------------------------------------------------------------------------------------------------------------------------------------------------------------------------------------------------------------------------------------------------------------|-----------------------------------------------------------------------------------------------------------------------------------------------------------------------------------------------------------------------------------------------------------------------------|--------------------------------------------------|--------------------------------------------------------------------------------------------------------------------------------------------------------------------------|-----------------------------------------------------|---------------------------------------------------------------------------------------------------------------------------------------------------------------------------------------------------------------------------------------------------------------------------------------------------------------------------------------------------------------|
| 55<br>Bynum 2020<br>USA                                             | <b>Research Paper</b><br>Four doctors from two<br>Community Health<br>Centres convenient<br>sample because they<br>offer services to<br>uninsured people                                                                                                                                                                                                                              | To assess the doctor's<br>(Asthma Management)<br>perceptions of<br>uninsured patients.                                                                                                                                                                                      | <b>Doctors</b><br>primary care                   | Uninsured                                                                                                                                                                | <b>Yes</b>                                          | 3 out of the 4 Doctors indicated that low SES patients have issues with medication compliance.<br>All the participants indicated that access to affordable medication due to patients' SES was a barrier.<br>Paper states that it might be possible to improve physicians' decision-making through techniques that minimize biases.                           |
| 56<br>Crandlemire<br>2020<br>Canada                                 | <b>Editorial/Comment</b><br>A discussion about the<br>literature regarding<br>healthcare disparities<br>for people with low SES<br>and the role of<br>unconscious biases<br>held among healthcare<br>providers.                                                                                                                                                                       | Unconscious Bias in<br>Nursing is more likely<br>activated and more<br>prevalent during high<br>pressure or time<br>sensitive scenarios,<br>when people are busy<br>and tired, or<br>when decisions need to<br>be made and there is<br>missing or ambiguous<br>information. | <b>Nurses</b><br>Specialism<br>not<br>specified. | SES                                                                                                                                                                      | <b>NA</b>                                           | Decision-making is influenced by both positive and negative attitudes toward people due to unconscious or conscious biases held by healthcare providers which can affect patient care outcomes.                                                                                                                                                               |
| 57<br>Diniz et al 2020<br>International<br>(different<br>countries) | <b>Research Paper</b><br>A Mixed methods study.<br>Video vignette: Two<br>women, each doing two<br>different pain-inducing<br>movements.<br>After watching the<br>vignette nurses were<br>asked to:<br>1. Associate five<br>characteristics to the<br>women.<br>2. write a brief story to<br>describe 'the<br>woman's pain and<br>how it affects life<br>recommending a<br>treatment. | Examined how nurses'<br>perceptions of pain<br>patients' SES were<br>associated with (more<br>or less) dehumanizing<br>inferences about their<br>pain and different<br>treatment<br>recommendations.                                                                        | <b>Nurses</b><br>Pain                            | The video vignette women SES was determined using the MacArthur Scale of Subjective Social Status (based on appearance). Low and middle SES women chosen for the videos. | <b>Yes</b>                                          | Words associated with the middle SES women were - calm, friendly, informed, anxious, sociable.<br>Words associated with the lower SES women were - withdrawn, tough, passive, hardworking, worried, poorly informed.<br>Treatment decisions are similar except the low SES patient is referred to psychoeducation- because of a perceived lack of competence. |



|    | <b>Author(s)<br/>date<br/>Country</b> | <b>Type of Publication<br/>Research<br/>design/method<br/>(If applicable)</b>                                                                                                                         | <b>Aim(s)<br/>(If stated)</b>                                                                                                                                                                                                         | <b>Population<br/>Professional<br/>Specialty</b> | <b>Concept<br/>SES Measure</b>                                                        | <b>Context<br/>Link HP<br/>Bias &amp;<br/>Decision-<br/>making</b> | <b>Key results, findings, or information</b>                                                                                                                                                                                                                                                                                   |
|----|---------------------------------------|-------------------------------------------------------------------------------------------------------------------------------------------------------------------------------------------------------|---------------------------------------------------------------------------------------------------------------------------------------------------------------------------------------------------------------------------------------|--------------------------------------------------|---------------------------------------------------------------------------------------|--------------------------------------------------------------------|--------------------------------------------------------------------------------------------------------------------------------------------------------------------------------------------------------------------------------------------------------------------------------------------------------------------------------|
| 58 | Veesart et al<br>2020<br>US           | <b>Editorial/Comment</b><br>A discussion about<br>unconscious bias and<br>how it might impact on<br>nursing care.                                                                                     | Everyone has a cultural<br>lens through which we<br>view the world, which<br>can sometimes create<br>biases. Often, the<br>decisions we make are<br>directly influenced by<br>those biases, even<br>when we espouse other<br>beliefs. | <b>Nurses</b><br>Specialism<br>not<br>specified. | SES                                                                                   | <b>NA</b>                                                          | Making decisions based on prejudices can have devastating impacts on<br>nursing care. The first step in addressing this is self-awareness. Bias<br>decisions often occur under stressful situations                                                                                                                            |
| 59 | Beyer et al 2021<br>UK                | <b>Systematic review</b><br>Included works<br>published between<br>January 2004 and April<br>2020. PubMed, Embase<br>and Cochrane Central<br>databases                                                | To assess the current<br>evidence for factors<br>that influence<br>treatment decision-<br>making in localized<br>kidney Cancer                                                                                                        | <b>Multi-<br/>Professional<br/>cancer</b>        | socio economic status and<br>education status - as reported<br>in the primary papers. | <b>Yes</b>                                                         | Education status, socioeconomic status, a family history of cancer, and<br>cancer anxiety can be barriers to treatment decisions in kidney cancer.<br>SES and economic variables were identified as barriers to treatment<br>decisions.                                                                                        |
| 60 | Chase 2021<br>USA                     | <b>Editorial/Comment</b><br>A discussion regarding<br>health disparities<br>research and the<br>negative stereotypes<br>and attitudes that<br>providers can hold<br>toward certain patient<br>groups. | Biased interactions with<br>providers are a dynamic<br>two-way process that<br>can influence patients'<br>satisfaction and trust in<br>the health care<br>provider. Leading to<br>impairments in the<br>patient's health<br>outcomes. | <b>Muti-<br/>professional<br/>Cancer</b>         | SES                                                                                   | <b>NA</b>                                                          | Advantageous and standard-of-care treatments may not be recommended<br>to certain patients because physicians believe that those patients may not<br>adhere to them.<br>When faced with limited time to adequately assess the patient's problem,<br>physicians may rely on their implicit stereotypes to make hasty decisions. |

| Author(s)<br>date<br>Country            | Type of Publication<br>Research<br>design/method<br>(If applicable)                                                                                                                                                                                                                                | Aim(s)<br>(If stated)                                                                                                                                                               | Population<br>Professional<br>Specialty       | Concept<br>SES Measure                                                 | Context<br>Link HP<br>Bias &<br>Decision-<br>making | Key results, findings, or information                                                                                                                                                                                                                                                                                                                                                                                                         |
|-----------------------------------------|----------------------------------------------------------------------------------------------------------------------------------------------------------------------------------------------------------------------------------------------------------------------------------------------------|-------------------------------------------------------------------------------------------------------------------------------------------------------------------------------------|-----------------------------------------------|------------------------------------------------------------------------|-----------------------------------------------------|-----------------------------------------------------------------------------------------------------------------------------------------------------------------------------------------------------------------------------------------------------------------------------------------------------------------------------------------------------------------------------------------------------------------------------------------------|
| 61<br>Khidir et al 2021<br>USA          | <b>Research Paper</b><br>Cross-sectional analysis of a sample taken from 100% of Medicare claims for emergency department (ED) visits. ED visits from January 1, 2016, through December 31, 2019. Decision about admission or discharge were analysed according to race, Medicaid, and low income. | To estimate the consistency of ED physician admission propensities across categories of patient sex, race and ethnicity, and Medicaid enrolment.                                    | <b>Doctors</b><br>Emergency care              | insurance status - low income.                                         | <b>No</b>                                           | Doctors who are more or less likely to admit patients from the ED are more or less likely to do so regardless of SES.<br>No evidence of SES bias and decision-making about admission established.                                                                                                                                                                                                                                             |
| 62<br>Manzer et al<br>2021<br>USA       | <b>Research Paper</b><br>Qualitative Interviews                                                                                                                                                                                                                                                    | To assess bias through the case of contraception.                                                                                                                                   | <b>Multi-professional</b><br>Family Planning. | SES and Class                                                          | <b>Yes</b>                                          | Participants link pregnancy risk to women of low SES. Differences in contraception advice found. HPs more likely to steer patients of low SES toward long-acting contraception - can last 1 year or more, rather than prioritizing patients' preferences. HP Bias decision-making may be exacerbated by the fast-paced, high-stress environments and lack of time.                                                                            |
| 63<br>Agerstrom et al<br>2021<br>Sweden | <b>Research Paper</b><br>A retrospective multiple regression analysis study. Data extracted from Swedish LISA database                                                                                                                                                                             | To examine SES disparities in In Hospital Cardiac Arrest (IHCA) treatment and survival. Assessing SES at the patient level and controlling other variables to assess impact of SES. | <b>Multi-professional</b><br>Cardiac Care     | SES proxy used highest level of completed education and annual income. | <b>Yes</b>                                          | Patients with lower SES, low income and low education were all significantly associated with more delay, and lower levels of immediate and long-term survival.<br>People with high SES are more likely to have their heart rhythm monitored prior to the IHCA, despite having better health (less comorbidity).<br>Heart Rhythm monitoring was significantly associated with less delay and increased immediate survival and 30-day survival. |

|    | Author(s)<br>date<br>Country        | Type of Publication<br>Research<br>design/method<br>(If applicable)                                                                                                                                                                                                                   | Aim(s)<br>(If stated)                                                                                                                                                                                           | Population<br>Professional<br>Specialty | Concept<br>SES Measure                                                                                                         | Context<br>Link HP<br>Bias &<br>Decision-<br>making | Key results, findings, or information                                                                                                                                                                                                                                                                                                                                                                                                                                             |
|----|-------------------------------------|---------------------------------------------------------------------------------------------------------------------------------------------------------------------------------------------------------------------------------------------------------------------------------------|-----------------------------------------------------------------------------------------------------------------------------------------------------------------------------------------------------------------|-----------------------------------------|--------------------------------------------------------------------------------------------------------------------------------|-----------------------------------------------------|-----------------------------------------------------------------------------------------------------------------------------------------------------------------------------------------------------------------------------------------------------------------------------------------------------------------------------------------------------------------------------------------------------------------------------------------------------------------------------------|
| 64 | Bernardes et al<br>2021<br>Portugal | <b>Research Paper</b><br>Vignette: Drawing on a social psychological model of dehumanization. Two online experimental studies were conducted. vignettes/images depicting 2 cases of women with chronic low-back pain, followed by videos of them performing a pain-inducing movement. | To test the effect of patient socioeconomic status on pain assessment and management. Also, whether patient dehumanization and perceived life hardship mediated these effects.                                  | <b>Multi-professional</b><br>Pain       | SES was manipulated: level of education (incomplete high school education Vs degree) and occupation (factory worker Vs Judge). | <b>Yes</b>                                          | Medical students: pain assessment was less comprehensive for low SES. They rated the low SES patient as having slightly lower pain intensity during movement but perceived her as more credible and with higher pain-related disability.<br>Nurses: pain assessment was less comprehensive for higher SES. Nurses reported being slightly more willing to offer individualized care to the low SES patient. Lower SES patients were perceived as being more disabled by the pain. |
| 65 | Kirkham et al<br>2022<br>UK         | <b>Editorial/Comment</b><br>A discussion about the Department of Health funded evaluation of the MIDIRS about Informed Choice leaflet. Stereotyping can be a defence mechanism which assisted midwives in coping with the pressures of work.                                          | Midwives sometimes misjudged women's ability and willingness to participate in their maternity care and, therefore, women can be negatively labelled about things like housing tenure or social class [or age]. | <b>Midwives</b><br>Maternity            | Social class discussed                                                                                                         | <b>NA</b>                                           | SES stereotyping judgements affect Midwives behaviour. Low SES Women's silence reinforced the staff's perception that 'they don't want information.' It may also enable busy clinics to move at an 'efficient' and 'reasonable' pace.                                                                                                                                                                                                                                             |
| 66 | Bruno et al 2022<br>Canada          | <b>Research Paper</b><br>Prospective cross-sectional study from five primary care practices. A randomized controlled trial of a diabetes goal setting and shared decision-making plan.                                                                                                | To assess if SES is associated with empathic communication and decision quality in Diabetes Care.                                                                                                               | <b>Multi-professional</b><br>Diabetes   | Patient self-reported their ethnicity, education level and income prior to the trial.                                          | <b>No</b>                                           | Shared decision-making was not impacted by low education or income.                                                                                                                                                                                                                                                                                                                                                                                                               |

|    | <b>Author(s)<br/>date<br/>Country</b> | <b>Type of Publication<br/>Research<br/>design/method<br/>(If applicable)</b> | <b>Aim(s)<br/>(If stated)</b>                                                                                                                                                                                                                                                | <b>Population<br/>Professional<br/>Specialty</b> | <b>Concept<br/>SES Measure</b> | <b>Context<br/>Link HP<br/>Bias &amp;<br/>Decision-<br/>making</b> | <b>Key results, findings, or information</b>                                                                                    |
|----|---------------------------------------|-------------------------------------------------------------------------------|------------------------------------------------------------------------------------------------------------------------------------------------------------------------------------------------------------------------------------------------------------------------------|--------------------------------------------------|--------------------------------|--------------------------------------------------------------------|---------------------------------------------------------------------------------------------------------------------------------|
| 67 | Torres et al 2022<br>USA              | <b>Review</b><br>Literature review                                            | To assess implicit biases among healthcare providers, the influence of implicit biases on providers' medical judgments and communication, and the mechanisms by which this impaired patient-physician communication affects patients' health outcomes and disease prognoses. | <b>Doctors</b><br>Gynaecology<br>Oncology        | Paper discusses SES            | <b>NA</b>                                                          | SES and insurance status impacts on unequal care and quality of care. SES associated with non-adherence to clinical guidelines. |

# BMJ Open

## Health Professionals implicit bias of patients with low socioeconomic status (SES) and its effects on clinical decision-making: A Scoping Review

|                                 |                                                                                                                                                                                                                                                                                                   |
|---------------------------------|---------------------------------------------------------------------------------------------------------------------------------------------------------------------------------------------------------------------------------------------------------------------------------------------------|
| Journal:                        | <i>BMJ Open</i>                                                                                                                                                                                                                                                                                   |
| Manuscript ID                   | bmjopen-2023-081723.R2                                                                                                                                                                                                                                                                            |
| Article Type:                   | Original research                                                                                                                                                                                                                                                                                 |
| Date Submitted by the Author:   | 28-May-2024                                                                                                                                                                                                                                                                                       |
| Complete List of Authors:       | Job, Claire; Cardiff University; Cardiff University<br>Adenipekun, Bami; Cardiff University<br>Cleves, Ann; Cardiff University<br>Gill, Paul; Northumbria University, Department of Nursing, Midwifery and Health<br>Samuriwo, Ray; Edinburgh Napier University, School of Health and Social Care |
| <b>Primary Subject Heading</b>: | Public health                                                                                                                                                                                                                                                                                     |
| Secondary Subject Heading:      | Sociology                                                                                                                                                                                                                                                                                         |
| Keywords:                       | Clinical Decision-Making, Health Equity, Stereotyping, Systematic Review                                                                                                                                                                                                                          |
|                                 |                                                                                                                                                                                                                                                                                                   |

SCHOLARONE™  
Manuscripts



I, the Submitting Author has the right to grant and does grant on behalf of all authors of the Work (as defined in the below author licence), an exclusive licence and/or a non-exclusive licence for contributions from authors who are: i) UK Crown employees; ii) where BMJ has agreed a CC-BY licence shall apply, and/or iii) in accordance with the terms applicable for US Federal Government officers or employees acting as part of their official duties; on a worldwide, perpetual, irrevocable, royalty-free basis to BMJ Publishing Group Ltd ("BMJ") its licensees and where the relevant Journal is co-owned by BMJ to the co-owners of the Journal, to publish the Work in this journal and any other BMJ products and to exploit all rights, as set out in our [licence](#).

The Submitting Author accepts and understands that any supply made under these terms is made by BMJ to the Submitting Author unless you are acting as an employee on behalf of your employer or a postgraduate student of an affiliated institution which is paying any applicable article publishing charge ("APC") for Open Access articles. Where the Submitting Author wishes to make the Work available on an Open Access basis (and intends to pay the relevant APC), the terms of reuse of such Open Access shall be governed by a Creative Commons licence – details of these licences and which [Creative Commons](#) licence will apply to this Work are set out in our licence referred to above.

Other than as permitted in any relevant BMJ Author's Self Archiving Policies, I confirm this Work has not been accepted for publication elsewhere, is not being considered for publication elsewhere and does not duplicate material already published. I confirm all authors consent to publication of this Work and authorise the granting of this licence.

# Health Professionals implicit bias of patients with low socioeconomic status (SES) and its effects on clinical decision-making: A Scoping Review

Claire Job<sup>1\*</sup>, Bami Adenipekun<sup>2</sup>, Anne Cleves<sup>3</sup>, Paul Gill<sup>4</sup>, Ray Samuriwo<sup>5</sup>

## Claire Job

<sup>1\*</sup>School of Healthcare Sciences, Cardiff University; Cardiff, United Kingdom

## Bami Adenipekun

<sup>2</sup>Patient and Public Involvement Representative

## Anne Cleves

<sup>3</sup>Velindre University NHS Trust Library, Cardiff University Information Services. Velindre Cancer Centre Cardiff, United Kingdom

## Paul Gill

<sup>4</sup>Department of Nursing, Midwifery and Health, Northumbria University, Newcastle, United Kingdom.

## Ray Samuriwo

<sup>5</sup>School of Health and Social Care. Edinburgh Napier University, Edinburgh, United Kingdom

## Corresponding Author:

\*Claire Job, School of Healthcare Sciences, Cardiff University, United Kingdom

Email: [jobc@cardiff.ac.uk](mailto:jobc@cardiff.ac.uk)

**Word Count: 9023 words** excluding abstract, tables, figures, references.

## Abstract

### Objectives

Research indicates that people with lower socioeconomic status (SES) receive inferior healthcare and experience poorer health outcomes compared to those with higher SES, in part due to Health professional (HP) bias. We conducted a scoping review of the impact of HP bias about SES on clinical decision-making and its effect on the care of adults with lower SES.

### Design

JBI scoping review methods were used to perform a systematic comprehensive search for literature. The scoping review protocol has been published in BMJ Open.

### Data Sources

Medline, Embase, ASSIA, Scopus and CINAHL were searched, from the first available start date of the individual database through to March 2023. Two independent reviewers filtered and screened papers.

### Eligibility Criteria

Studies of all designs were included in this review to provide a comprehensive map of the existing evidence of the impact of HP bias of SES on clinical decision-making and its effect on the care for people with lower SES.

### Data extraction and Synthesis

Data were gathered using an adapted JBI data extraction tool for systematic scoping reviews.

### Results

Sixty-seven papers were included from 1975-2023. Thirty-five (73%) of included primary research studies reported an association between HP SES bias and decision-making. Thirteen (27%) of the included primary research studies did not find an association between HP SES bias and decision-making. Stereotyping and bias can adversely affect decision-making when the HP is fatigued or has high cognitive load. There is evidence of intersectionality which can have a powerful cumulative effect on HP assessment and subsequent decision-making. HP implicit bias may be mitigated through the assertiveness of the patient with low SES.

### Conclusion

HP decision-making is at times influenced by non-medical factors for people of low SES, and assumptions are made based on implicit bias and stereotyping, which compound or exacerbate health inequalities. Research that focuses on decision-making when the HP has high cognitive load, would help the health community to better understand this potential influence.

## Key Words

Socioeconomic Status, Implicit Bias, Unconscious Bias, Socioeconomic Disparities, Healthcare Disparities, Clinical Decision-making, Healthcare Professionals, Scoping Review.



## Article Summary

### Strengths and limitations

- This scoping review has a previously published protocol and has been conducted in line with international standards for best practice, to ensure rigor and transparency.
- The inclusion of a patient and public interest representative in the research team added quality to this review, by ensuring that the review is relevant, meaningful, and informed by the perspective of the people that access and utilise healthcare services.
- This work summarises the body of evidence in a clear concise manner, which highlights the patterns, advances, and gaps in what is known about this topic as well as the priorities for future research.
- Due to the nature of funding, only studies published in English were included and therefore this scoping review may have excluded relevant literature published in other languages.
- In keeping with the nature of a scoping review, the quality of literature collected was not evaluated.

## Introduction

Socioeconomic status (SES), a social determinant of health, is a key causative and contributory factor to disparities and inequities in morbidity as well as mortality in many nations<sup>(1-3)</sup>. There is a wide range of robust empirical evidence from many settings which indicates that people with lower SES tend to have a shorter life expectancy and worse health related outcomes in comparison to more affluent people<sup>(1-4)</sup>. People with higher socioeconomic status (SES) have better life chances, and thrive more than those in other socioeconomic groups<sup>(5-7)</sup>. The causes of the social gradient in health are complex, and the exact nature of the relationship is difficult to establish, because it is informed by both individual factors such as health behaviour but also factors associated with economic wealth<sup>(8-9)</sup>. The gradient in health and SES is also subject to a person's power, prestige, and the social connections they enhance<sup>(5)</sup>. Therefore, SES related healthcare disparities are influenced by how a person's SES is perceived by themselves and others<sup>(5,6)</sup>.

There is evidence that suggests the care people receive is subject to Health Professionals (HPs) implicit bias arising from perceptions of patients with low SES<sup>(10)</sup>. Every person's thinking is shaped by lived experiences; interacting with people whose lived experience more closely reflects our own can lead people to using a favourable bias; just as unfavourable bias can be attributed to people whose life experience differs from one's own<sup>(11,12)</sup>. These biases are often subconscious or implicit and manifest in unthinking actions or ill-considered behaviours<sup>(11-15)</sup>. HPs are susceptible to multiple implicit biases relating to different characteristics such as SES, gender, weight, age, and ethnicity in their decision-making<sup>(11,12,16)</sup>. Implicit biases affect HPs decision-making about different aspects of patient care, such as diagnosis and treatment, often with deleterious consequences for the healthcare of that are minoritised, marginalised or othered<sup>(17)</sup>. HPs and patients hold implicit biases alike, which hinder the formation of a therapeutic healthcare relationship, patient experience, clinical decision-making, and care quality<sup>(9)</sup>.

## Aim

We sought to scope the reported impact of HP bias about SES on clinical decision-making and its effect on the care for people with lower SES in the wider literature. Our aim in this scoping review was to answer three related research questions:

- RQ1: What has been published about implicit SES bias and HP attitudes or behaviours when deciding and providing care?
- RQ2: How does SES effect the dynamics of the HP and patient relationship?
- RQ3: What recommendations for practice have been postulated, implemented, or evaluated to address HP implicit bias related to SES?

## Operational Definitions

It is important to define key concepts at the onset of this work so that there is clarity about their use in this scoping review. Our operational definitions are summarised in figure 1 and are set out in detail with their underpinning rationale in our protocol for this scoping review<sup>(13)</sup>.

## Socioeconomic Status

SES is complex and challenging to define. Internationally, typically countries measure SES using Multiple Indices of Deprivation (sometimes called Multidimensions of Deprivation), which include economic factors such as income but also factors such as education, physical environment (sometimes known as neighbourhood quality), and health<sup>(13,18)</sup>. Papers will be included in this scoping review when the connection between SES of the patient (or one of its discrete measures, e.g., income, unemployment, education) and HP decisions is explored. There are some limitations to the use of discrete measures like income as proxies for SES, but it is prudent to include papers which include proxy measures of SES, as this is more likely to reflect the way healthcare professionals make decisions, as they encounter

1 people in their practice<sup>(13,19)</sup>. In other words, we assert that healthcare professionals are more likely to use discrete  
2 measures of SES, rather than more robust empirical measures to inform their perceptions of patients in everyday  
3 practice<sup>(17)</sup>. Therefore, we contend that it is apposite to include papers with discrete measures that may be limited in  
4 their utility as proxy measures of SES in this scoping review, because they offer useful insights into factors relating to  
5 healthcare implicit SES related bias(es) and how they affect HPs decision making about different facets of patient  
6 care in the reality of everyday practice.  
7

## 8 HP Biases and Patient Care

9  
10 Several systematic and scoping reviews<sup>(12,16,20)</sup> have explored the impact of HPs cognitive and other biases on patient  
11 care. However, only two of these systematic reviews<sup>(16,20)</sup> have focused specifically on the HP implicit bias and its  
12 impact on clinical decision making as well as the consequences for the quality, safety, equity, and appropriateness of  
13 patient care.  
14  
15

16 FitzGerald and Hurst's systematic review<sup>(16)</sup> explored HPs implicit biases relating to race/ethnicity, age, gender and  
17 SES, and indicate that biases are likely to influence diagnosis, treatment decisions and levels of patient care.  
18 Fitzgerald and Hurst's review<sup>(16)</sup> discusses evidence that social class may invoke more salient bias than bias  
19 associated with other characteristics such as race. Beyer<sup>(20)</sup> explored factors that influence treatment decisions in  
20 localised kidney cancer and found that education and socioeconomic status, were identified as barriers to HP making  
21 equitable treatment decisions.  
22  
23

24 Willems et al.'s systematic review<sup>(12)</sup> focuses on the impact of SES on doctor-patient communication, however this  
25 review does not consider decision making. Willems et al<sup>(12)</sup> found that patients with lower SES had a less positive  
26 dialogue with their doctor, characterised by lower levels of information giving, less interactive discourse and a lower  
27 level of doctor advice/instruction.  
28  
29

## 30 Bias and Decision Making

31  
32 Biases can be explicit, implicit, favourable, or unfavourable, but regardless of form, it is an impediment to judging  
33 others fairly, which undermines safe, just, and equitable healthcare<sup>(11,16,21-23)</sup>. Explicit bias occurs when the individual  
34 has conscious thoughts, beliefs, and awareness that they evaluate people differently based on their characteristics,  
35 these evaluations consciously influence their behaviours and decision making<sup>(8,9,11,24)</sup>. In contrast, implicit bias is  
36 subconscious, and the individual is unaware of its influence on how they affect, cognition, behaviours, and decision-  
37 making<sup>(24,25,26)</sup>. Consequently, there is a more deliberate, volitive, and intentional process to decision-making when  
38 explicit bias is at play in contrast to the tacit, covert, unintentional nature of the relationship between implicit bias  
39 and decision-making<sup>(11,16,23)</sup>.  
40  
41

42  
43 Implicit and explicit bias are kindred but independent constructs which raises some methodological challenges and  
44 considerations with regards to their measurement<sup>(13,21)</sup>. Explicit bias relates to thinking that people are aware of and  
45 so can be measured through self-report, but there is the risk of people providing socially desirable responses<sup>(21)</sup>. The  
46 subliminal nature of implicit bias requires a different approach to surface and measure it given its multifaceted  
47 impact on a person's affect, cognition and behaviour<sup>(21)</sup>. The Implicit Association Test (IAT) is the most established  
48 way of measuring implicit bias and has strong psychometric properties in comparison to other implicit measures<sup>(21,27-  
49 30)</sup>. Therefore, it is important to briefly consider its strengths and limitations.  
50  
51

## 52 Implicit Association Test

53  
54 The (IAT) is a validated measure of implicit bias and with strong psychometric properties in comparison to other  
55 tools<sup>(30,31)</sup>. A consensus exists among researchers with regards to the IAT's lacks of a high test-retest reliability in the  
56 same individual<sup>(16)</sup>. However, the construct validity of the IAT, as well as its efficacy as a measure of implicit bias,  
57 especially as a predictor of real-life behaviour in the context of everyday life is contested<sup>(16,21,30,32)</sup>. Concerns relating  
58 to the predictive validity of the IAT persist among some researchers, progenitors cautioning against its use to  
59 forecast what people will do, or not do, and behave as they go about their lives, given the vicissitudes of human  
60

1 existence with their concomitant, contingent events that intersect in complex, unexpected, emergent ways to  
2 impact on an individual's affect, actions and behaviour<sup>(16,30)</sup>. Conversely, others<sup>(30,32)</sup> maintain that implicit and  
3 explicit measures of bias are not superfluous but have their merits in informing predictions about human behaviour  
4 in different ways that are distinct from each other. Despite this lively debate about the relative merits of IAT, it is  
5 most widely utilised measure of implicit race and ethnicity bias in healthcare<sup>(16,31,33)</sup>. One view is that there is  
6 specious evidence of the predictive validity of the IAT with regards to implicit racial bias<sup>(30,34)</sup>. This characterisation of  
7 the IAT's utility in establishing implicit racial bias is strongly disputed by many others<sup>(30,35,36)</sup>, who have a different  
8 understanding and conclusions predicated on the same data set. There is also evidence from a systematic review<sup>(37)</sup>,  
9 which highlights the limitations of the IAT in establishing multiplicative effect of several biases that intersect across  
10 multiple social identities.  
11  
12

## 13 14 Our approach

15 A better understanding of the impact SES has on HP patient related decision-makings arguably will provide a  
16 valuable new focus in tackling socio-economic health inequalities<sup>(8,9,12)</sup>. Therefore, it is imperative to undertake a  
17 scoping review that maps all pertinent evidence, integrates contemporary knowledge about this topic, clarifies key  
18 concepts, sets out evidence-based recommendations for practice and identifies the priorities for future research. In  
19 our view, it is essential that the scoping review should map all available research on implicit SES related bias  
20 regardless of the research method used. Several scoping reviews<sup>(24,33,38)</sup> have highlighted the valuable insights into  
21 implicit bias and its impact on HPs decision-making that can be gained from studies that use other research methods  
22 such as case study vignettes, questionnaires, think aloud interviews, randomised controlled trials and qualitative  
23 methods. This evidence from other scoping reviews underscores the aptness of our decision to include all studies  
24 that met our inclusion criteria as stated in detail in our a-priori protocol<sup>(13)</sup>, regardless of the methodological  
25 approach used. Debates about methodological rigour in relation to implicit bias should not be an impediment to use  
26 every means to better understand and address its pernicious impact on HPs clinical decision-making, often  
27 culminating in inappropriate or discriminatory care that gives rise to adverse event, causes harm, offence and  
28 negatively impact people's healthcare related outcomes. In sum, any scoping review that considers implicit bias in  
29 healthcare has an obligation to include all studies so the best possible relevant research evidence to inform and  
30 underpin the consistent delivery of safe high-quality, just, and equitable healthcare.  
31  
32  
33  
34  
35  
36

## 37 38 Method

39 We conducted a scoping review using JBI methodology<sup>(39,40)</sup> as set out in our a-priori published protocol<sup>(13)</sup>, and  
40 report our results in line with the Preferred Reporting Items for Systematic Reviews and Meta-Analyses for Protocols  
41 and Scoping Reviews (PRISMA-ScR) guidelines<sup>(41,42)</sup>. A detailed account of methods used in this scoping review is  
42 provided in our a-priori published protocol<sup>(13)</sup>, which has granular details about key elements such as the search  
43 strategy, inclusion/exclusion criteria which can be replicated. Therefore, we present a concise summary of the  
44 conduct of this scoping review in line with best practice reporting to avoid undue repetition.  
45  
46  
47

## 48 Patient, Public Involvement

49 This scoping review [and it's previously published protocol] has been developed with a member of the public (BA).  
50 The design of this scoping review draws upon BA's personal experience of living with, and beyond a cancer diagnosis,  
51 which entails regular contact with health services and healthcare professionals. Therefore, BA's lived experience and  
52 perspective has directly shaped the design, results, discussion and implication sections of this work.  
53  
54

## 55 Search strategy and data sources

56 Our literature search was carried out in three stages. In the first stage, an initial search was undertaken on Medline  
57 to identify and refine search terminology and consider Medical Subject Headings to ensure a comprehensive strategy  
58 that selected all the relevant papers published related to SES and its impact on health care. The Medline search  
59 strategy was tested, and the first 100 references scanned by three authors (AC, CJ, and RS) to ensure relevant papers  
60 were retrieved. Key papers were checked to confirm they were being retrieved by the search. In the second stage of

the search process, the Medline search strategy was adapted for use on other key databases (Medline, Embase, ASSIA, Scopus, CINAHL) to account for differences in controlled vocabulary and database functionality. We also searched the website of key organisations such as professional regulatory bodies, think tanks and policy making bodies for any pertinent publications. In the final stage of the literature search, we conducted back and forward chaining of included papers to identify any other relevant documents. All searches have been updated since the initial search date, of 21<sup>st</sup> October 2021 and are up to date as of 9<sup>th</sup> March 2023. Please see Supplementary Materials 1 for the detailed search strategy, and our a-priori published protocol<sup>(13)</sup> for more information.

### Screening and selection process

All retrieved citations were exported to the Rayyan systematic review software package and duplicates removed. In the first filter, the titles, and abstracts of the included papers were assessed against the inclusion criteria and independently filtered by two members of the project team (CJ and RS). Any differences with regards to the inclusion or exclusion, were resolved through discussion and after reviewing the full text of the papers in question. In the second filter, the full text papers were assessed against the inclusion and exclusion criteria. Our population, concept, context and design criteria are set out in Table 1, as per our protocol<sup>(13)</sup>. We only included publications in English as this was an unfunded study with no facility for translation<sup>(13)</sup>. Studies of all designs were included in this review because our focus was on mapping the evidence about the impact of HP bias of SES on clinical decision-making and its effect on the care for people with lower SES. Please see the search strategy in supplementary material 1 for a full list of search terms used in relation to SES.

Table 1: Identification the Population, Concept and Context and Design

| Population                                                                                                                                                                                                                                                                                                                       | Concept                                                                                                                                                                           | Context                                                                                                    | Design                                                                                                                                                                                 |
|----------------------------------------------------------------------------------------------------------------------------------------------------------------------------------------------------------------------------------------------------------------------------------------------------------------------------------|-----------------------------------------------------------------------------------------------------------------------------------------------------------------------------------|------------------------------------------------------------------------------------------------------------|----------------------------------------------------------------------------------------------------------------------------------------------------------------------------------------|
| <ul style="list-style-type: none"> <li>• HPs working in any healthcare setting including:</li> <li>✓ Doctors</li> <li>✓ Nurses</li> <li>✓ Physiotherapists</li> <li>✓ Occupational Therapists</li> <li>✓ Speech Language Therapists</li> <li>✓ Midwives</li> <li>✓ Mental Health Professionals</li> <li>✓ Pharmacists</li> </ul> | <ul style="list-style-type: none"> <li>• Socioeconomic Status (SES)</li> <li>• Papers that discuss discrete measures of SES as defined in the operational definitions.</li> </ul> | <ul style="list-style-type: none"> <li>• HP decision making when it interacts with bias of SES.</li> </ul> | <ul style="list-style-type: none"> <li>• Research studies of all designs that include primary data.</li> <li>• Case studies</li> <li>• Editorials</li> <li>• Opinion papers</li> </ul> |

### Data extraction and charting

Relevant data were gathered using an adapted version of the JBI data extraction tool systematic scoping reviews<sup>(43)</sup>, that was converted to an Access Database form (please see Supplementary Materials 2 for the adapted JBI data extraction form). This Access database form was tested on the first five papers and then adapted as per JBI guidance to gather all information pertinent to the review questions<sup>(43)</sup>. On completion of data extraction, the data was exported to an Excel spreadsheet to facilitate data analysis. Our mapping and reporting of the data was also informed by the lived experience and perspective of the patient and public interest representative on our team (BA) as stated in our protocol<sup>(13)</sup> and consistent with best practice in systematic reviews<sup>44</sup>.

## Results

### Selection of sources of evidence

The PRISMA flow diagram below (Figure 2) summarises how we searched for relevant publications and selected literature for inclusion, in line with best practice in scoping reviews<sup>(45)</sup>. Data analysis, interpretation, and reporting will be underpinned by the PAGER framework<sup>(46)</sup>.

## Summary of characteristics

The 'Characteristics of Included Publications' are presented Supplementary Materials 3. In our search strategy, we purposively cast a wide net to capture all relevant published papers, because of the complexity of defining SES and in total, we screened 11823 publications across different decades. At first filter, 11281 'off topic' papers were excluded, such as those concerned with children, dentistry, HP career development or focused on SES but not HP decision-making. We selected publications that considered HP decision-making from the HP's viewpoint and excluded papers that explored HP decision-making from the patient perspective.

We reviewed 542 studies for eligibility and retained 67 publications for inclusion in the scoping review. Seventy papers were retained for background reading and synthesis, because they provided broader insights about the relationship(s) between stereotyping, bias, and SES. We included a wide range of publications in this review. Forty-eight of the 67 included papers (72%) reported on original research, while the remaining papers were commentaries or opinion pieces (n=15) and reviews (n=4) about aspects of SES and HP decision-making. Most included papers, were from the United States of America (67%; n= 45), followed by the United Kingdom (10%; n=7), Canada (6%; n=4) and Portugal (3%; n=2). Two papers involved authorship across national boundaries, and these were labelled as international (3%; n=2). The remaining included papers included involved a single published paper from Denmark, Finland, Mexico, New Zealand, Norway, Sweden, and Pakistan.

The earliest published included research paper retained was by Crane<sup>(47)</sup> in 1975, who explored the impact of social factors and physiological criteria in HP treatment decisions about critically ill patients. Crane<sup>(47)</sup> explored doctor decision-making using case histories and questionnaires; she discovered that there were disparities in doctors' decision-making between a patient with a high-status occupation and another patient described as an unemployed labourer. Doctors in this study<sup>(47)</sup> offered more aggressive treatment options to people with high status occupations, even though they explicitly stated that they did not rate social status highly in their decision-making process. Crane<sup>(47)</sup> did not categorise this finding as implicit bias, which may reflect the prevailing socio-cultural beliefs at the time this study was conducted. However, in our view, this finding by Crane<sup>(47)</sup> is an example of implicit bias and the earliest research study we found. We also noted that from 2008 onwards, there was at least one publication about bias in relation to SES that met the inclusion criteria for this review. The increased frequency of publications from 2008 onward maybe a consequence of the emergence of the Fundamental Causes Theory<sup>(3)</sup> and a greater understanding of socioeconomic disparities in English healthcare provision facilitated by the Marmot Review<sup>(1)</sup>.

## Types of publications

The results of this scoping review highlighted various aspects of what has been published about implicit SES bias and HP attitudes or behaviours when deciding and providing care. Firstly, most of the 67 publications included in this scoping review were original research studies (n=48, 72%), with the remainder being reviews, commentaries, and opinion papers (n=19, 28%). This indicates that there has been a greater focus on building the evidence on this topic by focusing on conducting primary research relative to preparing other types of papers which provide useful and complementary insights. An alternative perspective to consider is that publications such as commentaries, opinion papers, and editorials often contain useful tacit insights and wisdom that constitute '*fugitive knowledge*' or '*soft intelligence*' as they exist beyond formal knowledge structures, because this information is risky to know and share with others through conventional mechanisms<sup>(48,49)</sup>. Therefore, these valuable insights are challenging to establish and understand using conventional research approaches. So, they may be scope to encourage the publication of different types of papers on this topic to facilitate a better understanding of how the SES related perceptions, views, or beliefs of a HP impact on their clinical decision-making in a manner that reflects the reality of healthcare which is delivered in complex adaptive systems.

## Geographical location

Many of the papers in this scoping review were authored by people based in the global north, specifically North America and Europe from 1995 onward (n=61, 91%), with the remainder being written by an international team of authors or people based in other parts of the world. This may be an indication of the impact that seminal publications such as the Fundamental Causes Theory<sup>(3)</sup> and Marmot Review<sup>(1)</sup> have had in highlighting the relationship between lower SES, health inequalities and poor health related outcomes in these parts of the world. It is also possible that the higher number of publications in these regions may reflect that there is greater scope to access funding for research on the relationship between implicit SES bias and HP's clinical decision-making within these settings. Then, it would be apt for more multinational research on the relationship between implicit SES bias and HP's clinical decision-making within especially those that are low and middle income, or described as developing and transitional, so there is a better understanding of this issue across nations especially those that are in the global south.

## Health Professionals

Thirty-one<sup>(9,18,19,25,28,47,50-74)</sup> of the forty-eight research papers reported on implicit bias in relation to Doctor/Physician clinical practice. The remaining papers explored or discussed decision-making from a multi-professional viewpoint (n=6)<sup>(75-80)</sup> and this included doctors, nurses or midwives working in multidisciplinary teams. Four research papers<sup>(29,81-83)</sup> explored nurse bias and decision-making, four involved medical students<sup>(27,84-86)</sup> and two papers<sup>(87,88)</sup> explored potential bias and decision-making of Psychotherapists/Counsellors. One study<sup>(89)</sup> was concerned with Occupational Therapists. The implicit bias in nurses and allied health professionals' practice is more evident in recent research studies which may reflect their increasingly central role in clinical healthcare decision-making. We found no studies that explored implicit bias in Pharmacists' decision making. This was a surprise as clinical decision-making is a fundamental aspect of pharmaceutical practice especially in settings such as the UK, where pharmacists have extended roles as non-medical prescribers and must be able to assess, diagnose, and treat patients<sup>(90,91,92,93)</sup>.

## Research Methods

Included primary research papers employed several different methodological approaches. Most research papers (50%, n=24) used a vignette approach<sup>(19,25,27-29,44,47,51,53,54,57,60,64,67,68,71,72,79,82-84,86,88,89)</sup>, and some combined the vignette approach with the Implicit Association Test (n=6)<sup>(27-29,67,68,72)</sup>. Some studies used prospective data collection (n=2)<sup>(29,80)</sup>, High Fidelity simulation (n=1)<sup>(85)</sup>, retrospective data review (n=3)<sup>(62,69,78)</sup> quantitative survey/questionnaire (n=8)<sup>(9,47,56,61,66,68,81,87)</sup>, qualitative interview (n=10)<sup>(52,55,58,63-65,70,75-77)</sup>, or a qualitative observational approach (n=2)<sup>(65,76)</sup>. Vignette studies illustrated the clinical scenario through a video recording (n=11)<sup>(19,25,44,51,53,64,71,79,82,83,88)</sup> while others used a combination of written case examples and written scenarios with pictures depicting the clinical cases (n=13)<sup>(27-29,47,54,57,60,67,68,72,84,86,89)</sup>. Representations of SES were indicated based on appearance of the patient, such as how they dressed and/or the description of the person which indicated their occupation. In studies that retrospectively or prospectively examined health data, health insurance status, or area level deprivation measures were applied to patient demographic information to measure the SES of the population.

## SES and HP Decision-making

Thirty-five of the forty-eight included primary research studies (73%) reported an association between SES and HP decision-making<sup>(9,18,19,47,51,52,54-58,60,62-66,68-73,76,77-79,81,82,83-87)</sup>. Meaning that in over two-thirds of the research papers reviewed HP decision-making about assessment, investigations, treatment, or care was influenced by a person's socioeconomic status. Thirteen papers did not detect any SES related bias in HP decision-making<sup>(25,27-29,44,53,59,61,67,74,80,88,89)</sup>. There were no discernible patterns or trends in the characteristics of these 13 papers, which used a variety of methodologies, involved different HPs across a range of specialty settings. Interestingly, four papers by Haider et al.<sup>(27-29,67)</sup> did not find a link between SES and decision-making, but detected high levels of implicit

favourable bias towards people with high SES, in doctors<sup>(28,67)</sup>, nurses<sup>(29)</sup> and medical students<sup>(27)</sup>. All these studies<sup>(27-29,67)</sup> combined the Implicit Association Test (IAT) and a vignette-based approach to assess the impact of implicit bias on decision-making. Three of these studies reported that 90.7% of doctors (n=215)<sup>(28)</sup>, 93% of nurses (n=245)<sup>(29)</sup> and 86% of medical students (n=211)<sup>(27)</sup> demonstrated an implicit preference toward people with High SES. However, in these studies<sup>(27-29)</sup>, the high levels of implicit SES bias were not evident in HP's decision-making. This result suggests that not all implicit bias leads to disparities in decision-making.

Table two displays the research that links SES and decision-making by professional group. Three quarters of the research papers demonstrate a link between SES and decision-making in doctors (n=23)<sup>(9,18,19,47, 51,52,54-58,60,62-66,68-73)</sup>, medical students (n=3)<sup>(84-86)</sup> and nurses (n=3)<sup>(81-83)</sup>. Five of the six studies with multi-professional participants demonstrated a link between SES and decision-making (n=5)<sup>(75-79)</sup>. There was not enough data within the included studies that focused on Occupational Therapists and Psychological Therapists, to draw any meaningful conclusions about the relationship between implicit SES bias, and their decision-making (Table 3).

Table 2: Link between SES and HP decision-making per professional group (research papers)

| Professional Group      | Link found | link found % | No link found | No link found % | Grand Total |
|-------------------------|------------|--------------|---------------|-----------------|-------------|
| Doctor                  | n=23       | 74%          | n=8           | 26%             | n=31        |
| Medical student         | n=3        | 75%          | n=1           | 25%             | n=4         |
| Multi-professional      | n=5        | 83%          | n=1           | 17%             | n=6         |
| Nurse                   | n=3        | 75%          | n=1           | 25%             | n=4         |
| Occupational Therapist  | n=0        | 0%           | n=1           | 0%              | n=1         |
| Psychological Therapist | n=1        | 50%          | n=1           | 50%             | n=2         |
| Grand Total             | n=35       | 73%          | n=13          | 27%             | n=48        |

In our included research publications, we identified that there were some medical specialities in which there were three or more research studies exploring SES related implicit bias in HP decision-making (see Table 3). Every included study (n=7; 100%) on pain assessment and/or management<sup>(60,71,72,79,81-83)</sup> reported a link between decision-making and SES. In obstetric/contraception care 80% (n=4) reported a link between implicit SES bias and HP decision-making<sup>(62,75-77)</sup>. More than three quarters of the studies involving cancer care (n=6; 86%)<sup>(19,51,57,69,70,84)</sup> and all but one study (n=7; 87.5%)<sup>(9,18,55,56,68,78,85)</sup> exploring coronary heart disease (CHD) detected disparities in HP decision-making related to SES. Three of the nine papers that explored multiple conditions detected a link between SES and decision-making<sup>(58,65,66)</sup>. Two of the included research papers on diabetes<sup>(64,65)</sup> and one in mental health<sup>(87)</sup> found a link between SES and decision-making. The two studies exploring SES and decision-making in trauma care did not detect a link between SES and decision-making<sup>(28,67)</sup>. For the other specialities listed in table five a single research paper was included; asthma<sup>(73)</sup>, dermatology<sup>(63)</sup>, kidney transplantation<sup>(52)</sup>, palliative care<sup>(47)</sup> and sickle cell disease<sup>(86)</sup>.

Table 3: Link between SES and HP decision-making per specialty (research papers)

| Condition                | Link Found | Link Found % | No Link found | No Link Found % | Total |
|--------------------------|------------|--------------|---------------|-----------------|-------|
| Cancer Care              | n=6        | 86%          | n=1           | 14%             | n=7   |
| Multiple Conditions      | n=3        | 38%          | n=6           | 62%             | n=9   |
| Coronary Heart Disease   | n=7        | 86%          | n=1           | 14%             | n=8   |
| Pain Assess/Management   | n=7        | 100%         | n=0           | 0%              | n=7   |
| Obstetrics/Contraception | n=4        | 80%          | n=1           | 20%             | n=5   |
| Diabetes                 | n=2        | 67%          | n=1           | 33%             | n=3   |
| Mental Health            | n=1        | 50%          | n=1           | 50%             | n=2   |



| Condition              | Link Found | Link Found % | No Link found | No Link Found % | Total |
|------------------------|------------|--------------|---------------|-----------------|-------|
| Trauma                 | n=0        | 0%           | n=2           | 100%            | n=2   |
| Asthma                 | n=1        | 100%         | n=0           | 0%              | n=1   |
| Dermatology            | n=1        | 100%         | n=0           | 0%              | n=1   |
| Kidney Transplantation | n=1        | 100%         | n=0           | 0%              | n=1   |
| Palliative Care        | n=1        | 100%         | n=0           | 0%              | n=1   |
| Sickle Cell Disease    | n=1        | 100%         | n=0           | 0%              | n=1   |
| Total                  | 35         | -            | 13            | -               | 48    |

## Discussion

As far as we are aware, this scoping review is the first to scope wider literature about the reported impact of HP SES related bias on clinical decision-making, through a comprehensive and systematic search of all the available evidence. This pioneering scoping review has generated key insights into what has been published about HP implicit SES bias, and how it affects HPs attitudes or behaviours as they make decisions about the provision of care for patients. In addition, this scoping review has also revealed how SES can affect the interpersonal dynamics of the HP and patient/service user in their relationship during care delivery. The insights that have been generated from the scoping review can be used to inform efforts to ensure that everyone receives safe high-quality, person-centred, evidence-based care in a just and equitable manner from every HP that they encounter. We begin our discussion by focusing on the salient points from the results relating to HPs, research methods and measures of SES. This progresses into a tightly focussed discussion of our results aligned to each research question in relation to wider literature.

### *Types of HP*

It is worth noting that just under two thirds (n=31)<sup>(9,18,19,25,28,47,50-74)</sup> of research papers on HP SES implicit bias and decision-making focused on doctors/physicians, with significantly less studies focusing on interprofessional or multidisciplinary teams (n=6)<sup>(75-80)</sup>, nurses (n=4)<sup>(29,81-83)</sup>, and medical students (n=4)<sup>(27,84-86)</sup>. The number of papers exploring decisions made by non-medical HPs gains interest in the literature after 2008 and reflects the changing landscape of healthcare decision-making, and the extended role of Nurses and Allied HPs. The lower number of research papers exploring decisions made by non-medical HPs may also be an indication of the perceived importance of different healthcare professionals in patient care by those who fund research. The empirical evidence at hand indicates that more is known about doctors/physicians' implicit SES biases and its consequences with regards to their decision-making than other professions. Given the global shift toward more plural approaches to healthcare delivery in which other HPs have extended roles, such as non-medical prescribing, there needs to be greater focus in future research that explores any link between SES and decision-making of other professionals in healthcare and its consequences for patient care.

### *Research Methods*

Our results indicate that the association between HP implicit SES bias and their decision-making has been examined using a variety of different research methods. However, half of the studies (50%; n=24)<sup>(19,25,27,29,44,47,51,53,54,57,60,64,67,68,71,72,79,82-84,86,88,89)</sup> utilised a vignette approach which used a video recording, or combined written case exemplars, scenarios, and images of different types of people. Some studies (n=6)<sup>(27-29,67,68,72)</sup> used the Implicit Association Test (IAT) to gather data regarding the participants' favourable bias as a precursor to vignette examination of decision-making. Regardless of the research method used, in most studies, the information provided to the participants with regards to SES was predicated on the patient's visual appearance such as the clothes that they were wearing, or how they were described which provided an insight into their profession, and or education.

Given the preponderance of vignette based research on this topic, it is prudent to consider its utility in understanding HP decision-making. Vignette studies are adept at establishing judgement and decision-making in a variety of professions, which have a high level of applicability and generalisability about how HPs undertake their work on a day to day basis<sup>(94-95)</sup>. In addition, vignette studies are an effective way of exploring people's beliefs, perceptions, attitudes, behaviour, and biases<sup>(95-98)</sup>. However, the utility of this approach in decision-making studies is contingent on the researcher's ability to craft and word a written or visual vignette that reflects the complex nature of reality, and that sets out key information in line with best scientific practice<sup>(94-96,99)</sup>. A key issue with the use of vignettes in research is that the information that they contain and convey, may subconsciously relay, or reflect the researchers' own perspectives and/or biases, which may influence the information they provide, as well as how they describe others in the scenarios that they create. Hence, it is widely recommended that the vignettes are evidence-based, reviewed by expert peers, or patients, and subsequently pilot tested to ensure that they are valid, culturally appropriate, and clear before they are used in a study<sup>(94,96,100)</sup>. Equally, others<sup>(101)</sup> have opted to co-create vignettes with members of the population they research to ensure that they are culturally relevant, utilise the appropriate terms, and convey the perspective(s) of the people who are being characterised therein. There is scope for the greater use of other research approaches such as high-fidelity simulation, prospective data collection, qualitative interviews, qualitative observation, quantitative surveys or questionnaires, and retrospective data reviews in studies on this topic. Conducting future research which uses some of these less commonly used approaches, on their own or in combination may shed new light on hitherto unknown or overlooked aspects of HP implicit SES related bias. This is particularly important as each research method has its own strengths and weaknesses, so using a combination of different approaches facilitates data triangulation, which can lead to more meaningful insights, enhance methodological rigour, and help to draw more robust conclusions from the data.

### *Measures of SES*

When developing the protocol for this study we made the decision to include proxy measures of SES and in retrospect this was an important decision. When exploring HP decision-making a number of proxy measures or indicators of SES have been utilised in the included research papers. Included papers used proxy measures such as occupation/Employment (n=15)<sup>(25,27,29,47,53-55,65,68,71,72,81,84,85,89)</sup>, Education (n=14)<sup>(9,28,52,58,59,61-63,70,78-80,82,89)</sup>, Income/Finances (n=11)<sup>(9,18,57,69,71,72,74-76,78,80)</sup>, appearance/dress (n=7)<sup>(19,25,53,64,83,85,88)</sup>, Health Insurance (n=3)<sup>(18,19,56)</sup>. A Formal SES or deprivation measure was used in only three of the studies included in this review<sup>(9,66,69)</sup>. We are aware that the inclusion of papers with single discrete measures such as these may be contested from a social science perspective, as SES is invariably multifaceted and complex<sup>(17)</sup>. A comprehensive discussion about the utility or otherwise of different discrete or proxy measures is beyond the remit of this paper, but there are some constraints to the use of some discrete measures such as income as a proxy for SES. The results of this scoping review support our view that proxy measures for SES, albeit with their limitations, can provide useful insights into HP implicit bias and its consequences for their clinical decision-making about patient care<sup>(17)</sup>. Therefore, by mapping the different methods that are used to measure and report SES in different types of publications, it is hoped that there is a clear overview of how they have been utilised in different contexts.

### *RQ1: Bias and Stereotyping*

HPs make different judgements or decisions about assessment, treatment and care based on who the patient is, as opposed to what they present with<sup>(64)</sup>. Three examples of this are highlighted below drawing on the evidence pertaining to pain assessment/management, maternity/contraception care and cardiac care. Wilson<sup>(81)</sup>, Anastas<sup>(72)</sup>, and Brandao et al.'s<sup>(82)</sup> studies highlight stereotyping as an influence in HP behaviour and decision-making. Brandao<sup>(82)</sup> reported that people with low SES were viewed as less credible during pain assessment by a HP. Anastas<sup>(72)</sup> and Wilson's<sup>(81)</sup> studies both found that people with low SES were often viewed as being untrustworthy and incapable during pain assessment, which led to disproportionate concerns about possible opioid addiction and triggered 'gate keeping' behaviours in the HP and this affected pain management decisions. Stereotyping and bias were also reported in maternity and family planning studies<sup>(65,76,77)</sup>. Manzer<sup>(77)</sup>, Smith-Oka<sup>(76)</sup> and Shawahna's<sup>(65)</sup>

1 studies identified the adverse impact of stereotyping on HPs assessment and decision-making. In these studies HPs  
2 considered women with low SES to be untrustworthy, bad mothers and/or promiscuous, as well as lacking capacity  
3 to make sensible decisions about planning future pregnancies<sup>(65,77,76)</sup>. Manzer<sup>(77)</sup>, Smith-Oka<sup>(76)</sup> and Shawahna<sup>(65)</sup>  
4 studies also reported that women with low SES were subject to biased disparities in advice, guidance, and  
5 management that nudged women toward using longer term (and on occasions irreversible) contraceptive options.  
6 Agerstrom et al<sup>(78)</sup> found that people with low SES were more likely to receive delays in cardiac arrest care compared  
7 to patients with higher SES. In this study<sup>(78)</sup>, the results revealed that highly educated patients ( $P < 0.001$ ) and  
8 patients with higher income ( $P = 0.001$ ) were significantly more likely to have their heart rhythm monitored prior to  
9 the onset of the cardiac arrest (holding all other variables). Heart rhythm monitoring was significantly associated  
10 with less delay, shorter duration, increased immediate survival and 30-day survival<sup>(78)</sup>. In this instance, SES related  
11 discrimination was associated with HP decision-making about who gets cardiac monitoring, which impacted on  
12 timely cardiac arrest care and patient survival. Goddu et al.'s<sup>(86)</sup> study highlights that perceptions and stereotyping  
13 amongst HPs can be triggered prior of in-person meetings with patients through language and words used in medical  
14 records or referral letters. This suggests that SES related stigma and bias can unwittingly be transmitted among HPs  
15 through the words and language that are used to characterise the person receiving care as well as to describe their  
16 lived experience. Therefore, the words, terminology, and language in reference to the people seeking or receiving  
17 care seem to be a key influence and, in some cases, a predeterminant of HP attitudes and behaviour that can  
18 adversely affect clinical outcomes.  
19  
20  
21  
22  
23

24 Social psychologists describe two fundamental dimensions of social perception when considering bias and  
25 stereotyping that help us to understand how people see each other<sup>(102)</sup>. The stereotype content model (SCM) was  
26 first proposed by Fiske<sup>(103,104)</sup> and provides a theory that explains how individuals form impressions, assumptions,  
27 and judgements of other individuals or groups based on their perceived warmth or capability. This theory is useful  
28 when making sense of the biases that might be impacting on HP interaction with patients and when making  
29 decisions<sup>(102)</sup>. The first dimension of the SCM relates to the **warmth** of a person, for example, how friendly or  
30 trustworthy they appear to be<sup>(103)</sup>. A person who is cooperative is deemed warm, and a person who is perceived as  
31 resistant is perceived as cold<sup>(104)</sup>. The second dimension relates to the **capability** of the person, for example, how  
32 skilled, intelligent, or competent they appear<sup>(103,104)</sup>. Warmth is evaluated first because it predicts future behaviour;  
33 capability is judged more slowly as it reflects the other person's ability to act competently<sup>(26)</sup>. In terms of SES or  
34 social class, for example, wealthier people are stereotyped as intelligent and better educated, therefore more  
35 capable than poorer people of lower SES or class<sup>(26)</sup>. SES can be signalled in many ways, the way a person dresses,  
36 their mannerisms or their accent, and these cues lead to behaviour changes that impact on the interaction between  
37 people<sup>(26)</sup>. The interaction between people is a dynamic process in the context of healthcare, so HPs make conscious  
38 and subconscious judgements about the other person, while simultaneously, the person seeking, or receiving  
39 healthcare makes similar judgements about the HP, this is then manifest through dialogue and influences how they  
40 see each other. Stereotypes do not need to be consciously recognised to generate discrimination, they can be  
41 subconsciously held, and triggered in such a way that people use them to frame their actions and to rationalise what  
42 they do, or do not do, in an automatic process with little or no thought or self-awareness<sup>(105)</sup>. Consequently, SES  
43 related stereotypes seem to be a contributing factor that maintain health inequalities, given that HP decision-making  
44 appears to lead to unwarranted variations in care and treatment<sup>(64)</sup>.  
45  
46  
47  
48  
49  
50  
51  
52  
53

### 54 *Time and cognitive load*

55 A recurring theme is the reported influence of HP workload on implicit bias and decision-making. There is evidence  
56 to suggest that HPs rely on implicit messages to 'fill the gaps' in comprehensive assessment when time and effortful  
57 thought are limited or prevented. Several papers<sup>(11,75,106,107)</sup> suggest that the contribution of cognitive load, stress and  
58 limited time-restraints impact on the HP's motivation to suppress implicit bias when making decisions. Self-  
59 awareness of one's own prejudice and bias is important when making decisions, but self-awareness is diminished  
60 when the HP is busy and does not have sufficient head space to mitigate the impact of potential implicit bias<sup>(108)</sup>.

Decision-making is ideally a controlled process which involves making intentional, conscious, and effortful thought<sup>(108)</sup>. However, if the HP is engaged in high levels of mental activity, is stressed or has limited time, then this can interrupt, impair or prevent a controlled thoughtful decision<sup>(108)</sup>. In these circumstances stereotyping is used as an energy saving mechanism that allows for intellectual shortcuts in decision-making that feel comfortable because they fit with what we think we know<sup>(11)</sup>. Therefore, HPs are less patient-centred in these circumstances and the unique features of the patient (which are discovered during comprehensive assessment) can be replaced with stereotypical patterns based on the patient belonging to a certain social group/s<sup>(11,107,108)</sup>. Brown<sup>(75)</sup> discovered that HPs took greater effort to ensure the confidentiality of the HIV diagnosis was protected for women with high SES. The HPs in the Brown study<sup>(75)</sup> considered confidentiality to be less of a priority for the women with low SES because their social position was less important. Brown<sup>(75)</sup> discovered that this bias tended to be activated when staff were overburdened and/or where health services were poorly resourced. There is also evidence that shows stereotyping can assist in coping with the pressures of HP practice<sup>(109)</sup>. Spending less time with patients with low SES may be perceived as helping to 'move clinics along,' because of the HP assumption that some people will not need as long as other people in clinic. Patients with low levels of SES, can often be viewed as needing less information because of an assumption they do not wish to be informed, because they ask less questions or because they do not have the capacity to retain information, and this assumption actually helps the clinic to regain lost time<sup>(109)</sup>.

### *Intersectionality of SES and other factors*

Intersectionality refers to the interactivity of different social identity structures such as race, class and gender, and how belonging to more than one social identity group can have a greater negative effect than belonging to one group alone<sup>(16,110)</sup>. Our results show that intersectionality can have a powerful cumulative effect on HP assessment and subsequent decision-making. Stereotypes and prejudices are stackable and the proclivity towards discriminatory attitudes, tendencies, and behaviours rises as perceived vulnerability of the person seeking or receiving care increases<sup>(16)</sup>. Denburg et al<sup>(57)</sup> explored race and social vulnerability for men with localised prostate cancer and discovered that the higher the perceived patient vulnerability by the HP, the more likely they were to opt for 'watchful waiting' as opposed to active treatment. For example, men who were deemed to have a low income, were widowed, or were characterised as being black by HPs, were the least likely to be referred for radical prostatectomy. McKinlay<sup>(18)</sup> explored non-medical influences on HP decision-making for patients with coronary heart disease and found that discriminatory attitudes and behaviours were linked to the patient's age, perceived level of income, and insurance status. Older adults with low income and without medical insurance were less likely to receive a primary cardiac diagnosis, however this discrimination did not affect younger patients who were low income and without insurance<sup>(18)</sup>. Fitzgerald's<sup>(16)</sup> systematic review which explored implicit bias in healthcare professionals, highlighted how perceptions relating to race, SES, and gender intersect, but also interact in complex ways. The intersectional interaction between different factors is arguably a reflection of the continuous nature of perceived warmth and capability matrix as previously described in the SCM, but the outcome for the patient can be bleaker when racial and class biases stereotypes overlap<sup>(26)</sup>. Our results about the complex intersection of SES and other factors such as race are consistent with wider evidence from other studies. For example, there is evidence which shows that controlling for SES, people who are of Afro-Caribbean heritage are three times more likely to be diagnosed with diabetes than their counterparts of European heritage, while people who are Lesbian, Gay, Bisexual, Transgender or identify as Queer are more likely to have multiple risk for cardiovascular disease than their heterosexual peers<sup>(4)</sup>. The evidence collected on intersectionality in this review demonstrates the importance of multivariable reviews of implicit bias, therefore exploring SES, race, age, or gender as individual factors in isolation will not tell the whole story. Instead, the intersectionality the distinctive characteristics, and traits that a person has as well as the social groupings that they belong to must be considered, especially given their complex interactions and cumulative effect on the care of patients is the correct way forward when we seek to understand patient experience.

## RQ2 *SES and HP Decision-making*

Dialogue plays a key role in how we see each other<sup>(111)</sup>. Initial impressions of both the HP and patient can be corrected through interaction between both parties<sup>(112)</sup>. Initial impressions of warmth and competence can be adjusted through dialogue during the assessment and decision-making process. This interaction however requires motivation for one or other party<sup>(51)</sup>. A motivated HP who offers more time, seeks the input of the patient, and consciously considers equality and/or equity can build a dialogue with the person based on 'what matters most to them'<sup>(103)</sup>. In the same way a patient who demonstrates existing knowledge and has an active or assertive manner in dialogue with the HP can influence the HP decision-making by altering the HPs assumptions related to the warmth or competence of the patient<sup>(51)</sup>.

Manderbacka<sup>(55)</sup> exploration of decision-making in relation to 'white collar' and 'blue collar' patients found that doctors were more likely to take a 'doctor-centred model' for communication, assessment and decision-making with patients from a 'blue collar' background, but tended to adopt a 'person-centred and shared decision-making model' with 'white collar' background patients. It is not always the case that a person who is inferred as capable is automatically also perceived as warm on the SCM matrix<sup>(113)</sup>, in fact some research has shown that when a person is viewed as capable and competent then the perception of warmth is viewed less positively<sup>(102,103,113)</sup>. This can mean that when a patient is perceived as lacking capability or competence then their warmth can be viewed more positively as a compensatory effect, which in turn triggers a greater paternalistic behaviour from the HP, that effects their communication style and quality<sup>(113)</sup>. Castaneda-Guarderas et al<sup>(114)</sup> and Krupat et al<sup>(51)</sup> assert that the perceived power differential between the HP and the patient can inhibit shared decision-making because it negatively effects patient trust<sup>(114)</sup>. Patients are less likely to participate in dialogue and shared decision-making if they perceive the HP as judgemental, in this way HP bias can trigger the patient's bias in a dynamic way, adversely affecting dialogue and patient centred care<sup>(51)</sup>.

Patient assertiveness can lead to more careful diagnostic testing for people who may have been otherwise disadvantaged because of their SES (56). Barnhart et al<sup>(56)</sup> explored non-medical reasons for disparities in coronary heart disease treatments and discovered that if patients with low SES adopted a health assertive manner, then their treatment recommendations (revascularisation) more closely mirrored patients who had high SES. Krupat et al<sup>(51)</sup> explored the effect of patient assertiveness in HP decision-making for older adults with breast cancer and similarly discovered that patients with low SES were more likely to have full staging of their cancer investigated when they made assertive requests. In both these studies<sup>(51,56)</sup> patient assertiveness led to more careful diagnostic testing for people who may have been otherwise disadvantaged because of their SES. Therefore, there is empirical evidence which suggests that implicit SES bias can manifest itself in HP-patient behaviours that impede relationship building, which could be mitigated with greater HP self-awareness and greater patient assertiveness<sup>(51,56,111)</sup>. Further research is needed to explore the impact of patient assertive requests on HP decision making. It is increasingly recognised any such improvement efforts that seek to address health inequalities, such as those caused by HPs implicit SES bias, must involve meaningful co-production and dialogue about health inequalities that enables and empowers people to have agency and to take action<sup>(115)</sup>.

## RQ3 *Measures to address HP implicit bias related to SES.*

We integrated a range of recommendations from included publications into three main themes: further research, education/training and policy, and guidelines. The reviewed papers highlight the need for further research to explore in more detail the reasons and mechanisms in which social factors affect and influence HP decision-making<sup>(54,55,59,61,63,69,72,73,82)</sup>. There is a gap in understanding mechanisms that prevent or inhibit the implicit judgment surfacing as explicit actions, particularly related to HP time and cognitive load<sup>(61,108)</sup>. Hence, this gap in understanding is a key priority for any future research and improvement efforts that seek to address HPs SES related decision-making and its negative impact on patient care.

Another recommendation arising from the reviewed papers is the exploration of education and training for both HPs and patient groups which seeks to increase HP self-awareness through perspective taking and/or help patients with health literacy and assertiveness<sup>(9,51,56,60,68,70,71,76,77,82,84,85)</sup>. There appears to be a gap in the evidence that requires further exploration, specifically, there are as yet unanswered questions about how training can successfully raise awareness of SES bias, and how the impact of this training on clinical practice can be assessed or evaluated in the short term and longer term<sup>(116)</sup>. The impact of health literacy education on SES related bias is outside of this scoping review, but moving forward, it would be prudent to consider how health literacy and assertiveness education with patients might help facilitate more active participation for patients with low SES, which may have a role in reducing health inequalities<sup>(56)</sup>.

Policies, guidelines, and best practice statements, which recognise the impact of SES on HP decision-making are needed to guide the HP when making decisions that inevitably include non-medical factors<sup>(58,70,75)</sup>. A smaller number of papers recommend that any such policies, guidelines, and best practice statements should be constructed with mindfulness of implicit bias<sup>(75,117)</sup>. Implicit bias needs to be explicitly discussed and integrated into the policy and guidelines that help to shape HP interactions and patient experience. There is evidence of this work is happening to help support people of global majority heritage who are minoritised because they are categorised as non-white<sup>(118)</sup>. This work must be expanded to include SES related bias, given its pervasive nature, as well as its complex interaction and intersection with race in relation to patient care.

## Strengths and limitations

This scoping review has its limitations which must be given consideration. Most included publications are from North America and Europe in the global north, therefore the relevance of its results to other parts of the world, especially those that are part of what is increasingly referred to as the global south is limited. The fact that only articles published in English were included, means that relevant works in other languages will have been omitted from this review. Consequently, the result of this scoping review provided a limited insight into other parts of the world, particularly those where English is not the native language, as well as in places where the organisation and delivery of healthcare takes place in systems that are distinct from those in North America and/or Europe. Conversely, the inclusion of research studies and other types of publications broadened the depth and breadth of this review. There was no critical appraisal or quality assessment of the included research studies, which is in keeping with JBI scoping review methodology<sup>(39,40)</sup>, and was apt; the focus was on mapping the literature on this topic. Drawing upon our diverse range of skills as patient and public interest representative (BA), a Librarian/Information Technologist (AC), and three HP academics (CJ, PG, RS), we reached a consensus on how best to convey the results to others in plain English, a series of recommendations for implementation in practice, as well as the priorities for future research.

## Implications for Practice and Policy

A key message arising from this scoping review for health services, professional bodies, and policy makers is that HP's have SES related implicit biases that influence how they organise and deliver patient care. HP decision-making is also subject to non-medical factors, as assumptions are often made about the care of people of low SES based on bias and stereotyping, which causes, or exacerbates health inequalities that can adversely affect patient's clinical outcomes<sup>(64)</sup>. It is important that we remain mindful that some people do not receive equitable care, so there is a responsibility for all HPs to do what they can to be better informed about their own practice in relation to equity, and to do what they can to address this issue. Heffernan<sup>(116)</sup> contends that people can find it unpalatable when they are confronted with evidence that challenges their firmly held big ideas, such as HPs who believe that they do no harm and always seek to do good, being informed that their implicit SES related biases may have deleterious impact on the quality, safety, and equity, of patient care. It is always tempting for people to elide inconvenient truths or unpalatable facts because if they are accepted, then the individual is compelled to deal with things in a different way or to address gaps in their knowledge, attitude, skills, and behaviour, which is nearly always challenging. Turning a

1 blind eye to biases can feel safe for an individual HP, but it is morally untenable as it contravenes the values that  
2 underpin healthcare and increasing the likelihood of people who are vulnerable, marginalised, silenced, and/or  
3 overlooked by wider society enduring unwarranted variations in care, receiving suboptimal care that is delivered in  
4 an iniquitous and unjust manner.  
5

6 It is challenging for anyone to be truly objective and self-critical about their clinical practice, especially with regards  
7 to implicit bias which is tacit and often reflects normalised patterns of thinking and behaviour. In other words,  
8 everyone has a rationale or vocabulary of motive, for what they do or do not do, which means that it is challenging  
9 for anyone to accept that they have implicit biases, which are often contrary to the way a person thinks about  
10 themselves and their behaviour towards others. On the other hand, genuine changes in behaviour and improvement  
11 in any human endeavour can only arise when there is a genuine acceptance of truth of the situation, specifically facts  
12 and issues at hand, including any implicit biases, with a concomitant theory of action<sup>(119)</sup>. As challenging as this may  
13 be, it is important to bear in mind that a transformation programme of action, especially in terms of improvement,  
14 requires a willingness to confront and examine all possible truths by asking searching questions, in this case about  
15 the organisation and delivery of healthcare. This sentiment is summed up in the view that not 'knowing something'  
16 is understandable because we are human, provided that the person is not turning a blind eye because they 'don't  
17 want to know'<sup>(116)</sup>.  
18  
19  
20  
21  
22  
23

24 Health inequalities only endure because of a lack of insight or willingness to address social injustice, social  
25 indifference, an ideological stance of a vacuum of leadership<sup>(115)</sup>. Given what this scoping review has surfaced about  
26 the potential impact of implicit SES related HP bias greater consideration is needed about how the results can inform  
27 efforts to reduce health inequalities. It is also important to concede that HPs implicit biases often mirror those of  
28 wider society at any given point in time, because their values, beliefs, attitude, outlook, and world view will be  
29 tempered and influenced by the communities that they belong to and the wider culture that they inhabit. However,  
30 HPs are held to a higher moral standard than other members of society because of who they are and what they do,  
31 which comes with the requirement and expectation for them to treat all that they come across in an equitable, just  
32 manner with dignity and respect. Social status is linked to power, so for people of low SES, there is often a power  
33 differential between HP's and themselves<sup>3</sup>. Bias is dynamic; therefore, the HP-patient interaction can reinforce  
34 perceptions and judgemental attitudes that further embed prejudice or stereotypes. Our results suggest that  
35 healthcare commissioners, educators and regulators should embed measures to mitigate HPs implicit SES related  
36 bias through policy, guidelines, or best practice statements. Healthcare commissioners, policy makers, educators,  
37 and regulatory bodies would also do well to ensure that everyone involved on the organisation and delivery of  
38 healthcare, especially HPs know that implicit SES related bias increases the risk of the most vulnerable people in  
39 society. Simply put, implicit SES related bias by HPs tends to result in people who are the most vulnerable receiving  
40 the worst care, which has a harmful impact on their wellbeing, health related outcomes and life expectancy. Given  
41 the reality of praxis in healthcare within complex adaptive systems, normalising the practice of HPs taking a brief  
42 intermission, when it is clinically safe and appropriate, to be self-aware and to seek a broader perspective, especially  
43 when they are under pressure or have a high cognitive load may help to overcome the impact of implicit bias on  
44 decision-making. Whatever view one adopts in relation to the issues raised by the results of this scoping review,  
45 more research is needed to ensure that healthcare policy and practice are evidence-based in relation to HPs implicit  
46 SES related bias.  
47  
48  
49  
50  
51  
52  
53  
54

## 55 Conclusion

56 This scoping review explored different aspects of SES related implicit bias and HP decision-making. Research in this  
57 area has grown and evolved significantly and the disciplinary focus has recently shifted from doctors to the wider  
58 healthcare team. While there remains limited understanding about the circumstances in which implicit bias is most  
59 likely to appear, some evidence suggests that this might be related to the HP's cognitive load, as time pressures can  
60 diminish self-awareness.

1 This review indicates that HPs often hold implicit bias of people with low SES, which can result in stereotyping and  
2 may compound or exacerbate health inequalities. It is therefore important to consider mechanisms to reduce the  
3 impact of this bias on HP decision-making. Greater awareness of the nature and potential impact of HPs implicit SES  
4 related bias and on patient care is urgently needed, as the bias associated with SES can make vulnerable people  
5 more vulnerable and may adversely affect clinical outcomes.  
6  
7

8  
9 Research that focuses on HP decision-making, the influence of non-medical factors, and the impact of limited  
10 time/high cognitive load, would therefore help the health community to develop evidence based interventions to  
11 mitigate HP bias. Real world solutions, which go beyond education, to identify appropriate approaches to HP  
12 decision making, are needed, to ensure decisions are equitable.  
13  
14

15 Our review highlights the need for relevant research to underpin related healthcare policy and practice. Based on  
16 the review, we have identified three pertinent research questions that should be prioritised in future work in this  
17 area:  
18

- 19 **1.** Does cognitive load reduce self-awareness of SES implicit bias and impact on the decision-making of the HP?
- 20 **2.** What are the best conditions to support shared decision-making with people who have low SES?
- 21 **3.** What training do HPs need to raise their self-awareness of implicit SES related bias and reduce its impact on  
22 their decision-making?  
23  
24  
25  
26  
27  
28  
29  
30  
31  
32  
33  
34  
35  
36  
37  
38  
39  
40  
41  
42  
43  
44  
45  
46  
47  
48  
49  
50  
51  
52  
53  
54  
55  
56  
57  
58  
59  
60



## Figure legend Caption

Figure 1: Key terms and their operational definitions in this scoping review

Figure 2: Prisma Flow Diagram

## Author Contributions

CJ, RS, PG, AC and BA discussed and refined ideas regarding the search strategy. AC developed the search strategy and conducted the database searches. CJ and RS extracted data and drafted the results. CJ is lead author and guarantor. CJ, RS and PG discussed and drafted the discussion of the paper with contribution from AC and BA.

## Conflict of Interest Statement

None of the people listed below declare any conflict of interest which may arise from being named as an author on this manuscript.

## Funding Statement

There are no funders to report for this submission. The lead author, CJ, was in receipt of a stipend from the Research Capacity Building Collaboration Wales (RCBC) First into Research (FiR) Fellowship scheme, to backfill her job on a part time basis, to lead this scoping review.

## Data Sharing Statement

No additional data available.

## Ethics Approval Statement

Ethical approval was not sought for this scoping review because it was a desk top review of previously published work.

1  
2  
3  
4 **Author Statements**  
5  
6  
7

8 **Claire Job**

9 <sup>1</sup>School of Healthcare Sciences, Cardiff University; Cardiff, United Kingdom:

10 [jobc@cardiff.ac.uk](mailto:jobc@cardiff.ac.uk)  
11  
12  
13

14 **Bami Adenipekun**

15 <sup>2</sup>Patient and Public Involvement Representative

16 [badenipekun@gmail.com](mailto:badenipekun@gmail.com)  
17  
18  
19

20 **Anne Cleves**

21 <sup>3</sup>Velindre University NHS Trust Library, Cardiff University Information Services. Velindre Cancer Centre

22 Cardiff, United Kingdom

23 [lynchae1@cardiff.ac.uk](mailto:lynchae1@cardiff.ac.uk)  
24  
25  
26  
27

28 **Paul Gill**

29 <sup>4</sup>Department of Nursing, Midwifery and Health, Northumbria University, Newcastle, United Kingdom.

30 [Paul.gill@northumbria.ac.uk](mailto:Paul.gill@northumbria.ac.uk)  
31  
32  
33  
34

35 **Ray Samuriwo**

36 <sup>5</sup>School of Health and Social Care, Edinburgh Napier University, Sighthill Campus, Edinburgh

37 [r.samuriwo@napier.ac.uk](mailto:r.samuriwo@napier.ac.uk)  
38  
39  
40  
41  
42  
43  
44  
45  
46  
47  
48  
49  
50  
51  
52  
53  
54  
55  
56  
57  
58  
59  
60

## References

1. **Marmot, M.** Fairer Society Healthy Lives: the Marmot Review. Strategy Review of Health Inequalities in England post-2010. Available: <https://www.gov.uk/research-for-development-outputs/fair-society-healthy-lives-the-marmot-review-strategic-review-of-health-inequalities-in-england-post-2010>
2. **Black, D.** Inequalities in Health: The Black Report. London : Penguin, 1980. <https://www.sohealth.co.uk/national-health-service/public-health-and-wellbeing/poverty-and-inequality/the-black-report-1980/the-origin-of-the-black-report/>
3. **Phelan JC, Link BG, Tehranifar P.** Social conditions as fundamental causes of health inequalities: theory, evidence, and policy implications. *J Health Soc Behav*, 2010. 51 Suppl:S28-40.  
[doi:10.1177/0022146510383498](https://doi.org/10.1177/0022146510383498)pmid:http://www.ncbi.nlm.nih.gov/pubmed/20943581
4. **Amato, K. R., M.-C. Arrieta, M. B. Azad, M. T. Bailey, J. L. Broussard, C. E.** The human gut microbiome and health inequalities. *Proceedings of the National Academy of Sciences*. 2021; 118, 25.
5. **Hastert, TA. Ruterbusch, JJ. Beresford, SAA.** Contribution of health behaviours to the association between area level socioeconomic status and cancer mortality. *s.l. : 2016, Social Science and Medicine*. 148: 52-58.
6. **Diex-Roux, AV.** Investigating Neighbourhood and area effects on health. *American Journal of Public Health*. 2001; 91, 11: 1783.
7. **Schwab, AP.** Putting cognitive psychology to work: Improving decision-making. *Social Science & Medicine*. 2008; 67: 1861–1869.
8. **Fasano, HT. McCarter, MSJ. Simonis, JM. Hoelscher, GL. Bullard, MJ.** Influence of Socioeconomic Bias on Emergency Medicine Resident Decision Making and Patient Care. *Sim Healthcare*.2021; 16: 85–91.
9. **Van Ryn, M. Burke, J.** The effect of patient race and socioeconomic status on physicians' perceptions of patients. *Soc Sci Med*. 2000; 50: pp813-828.
10. **Arpey, NC. Et al.** How Socioeconomic Status Affects Patient Perceptions of Health Care: A Qualitative Study. *Journal of Primary Care & Community Health*. 2017; 8, 3: 169–17
11. **Veesart, A. Barron, A.** Unconscious bias: Is it impacting your nursing care? *Nursing Made Incredibly Easy*. 2020: 47-49.
12. **Willems, S. et al.** Socio-economic status of the patient and doctor–patient communication: does it make a difference? *Patient Education and Counselling*. 2005; 56: 139–146.
13. **Job, C. Adenipekun, B., Cleves, A. Samuriwo, R.** Health professional's implicit bias of adult patients with low socioeconomic status (SES) and its effects on clinical decision-making: a scoping review protocol. *BMJ Open*. 2022; 12,
14. **Atkinson, A.B.** Multidimensional Deprivation: Contrasting Social Welfare and Counting Approaches. *The Journal of Economic Inequality*. 2003; 1: 51–65.
15. **Watson, V. Dibben, C. Cox, M. et al.** Testing the Expert Based Weights Used in the UK's Index of Multiple Deprivation (IMD) Against Three Preference-Based Methods. *Social Indicators Research*. 2019; 144, 3: 1055-1074.

16. **Fitzgerald, C. Hurst, S.** Implicit bias in healthcare professionals: a systematic review. *BMC Medical Ethics*. 2017; 18, 19, 1-18.
17. **Maule, A. J. and G. P. Hodgkinson.** "Heuristics, biases and strategic decision making." *The Psychologist*. 2002; 69-71., 15(2):.
18. **McKinlay, JB. Potter, DA. Feldman, HA.** Non-Medical influences on medical decision making. *Soc Sci Med*. 1996; 42, 5, 769-776.
19. **McKinlay, JB. Burns, RB. Durante, R. Feldman, HA et al.** Patient, physician and presentational influences on clinical decision making for breast cancer: results from a factorial experiment. *Journal of Evaluation in Clinical Practice*. 1997; 3, 1, 23-57.
20. **Beyer, K. Barod, R. Fox, L et al.** The Current Evidence for Factors that Influence Treatment Decision Making in Localized Kidney Cancer: A Mixed Methods Systematic review. *The Journal of Urology*. 2021; 206, 827-839.
21. **Maina IW, Belton TD, Ginzberg S, Singh A, Johnson TJ.** A decade of studying implicit racial/ethnic bias in healthcare providers using the implicit association test. *Social Science & Medicine*. 2018; 199:219-29.
22. **Thirsk LM, Panchuk JT, Stahlke S, Hagtvedt R.** Cognitive and implicit biases in nurses' judgment and decision-making: A scoping review. *International Journal of Nursing Studies*. 2022; 133:104284.
23. **Meidert U, Dönnges G, Bucher T, Wieber F, Gerber-Grote A.** Unconscious Bias among Health Professionals: A Scoping Review. *International Journal of Environmental Research and Public Health*. 2023; 20(16):65-69.
24. **Thompson J, Bujalka H, McKeever S, Lipscomb A, Moore S, Hill N, et al.** Educational strategies in the health professions to mitigate cognitive and implicit bias impact on decision making: a scoping review. *BMC Medical Education*. 2023; 23(1):455.
25. **Arber, A. McKinlay, J. Adams, A. Marceau, L. Link, C. O'Donnell, AO.** Patient Characteristics and Inequalities in doctors' diagnostic and management strategies relating to CHD: A video-simulation experiment. *Social Science and Medicine*. 2006; 62, 103-115.
26. **Durante F, Fiske ST.** How social-class stereotypes maintain inequality. *Curr Opin Psychol*. 2017 Dec; 10.1016/j.copsyc.2017.07.033., 18:43-48. doi:.
27. **Haider, AH. Sexton, J. Sriram, N. et al.** Association of Unconscious Race and Social Class Bias with Vignette-Based Clinical Assessment by Medical Students. *JAMA*. 2011; 306, 9: 942-951.
28. **Haider, AH. Schneider, EB. Sriram, N. et al.** Unconscious race and class bias: Its association with decision making by trauma and acute care surgeons. *Journal Trauma Acute Care Surgery*. 2014; 77, 3: 409-416.
29. **Haider, AH. Schneider, EB. Sriram, N et al.** Unconscious race and class biases among registered nurses: Vignette-based study using implicit association testing. *Journal American College of Surgeons*. 2015; 20, 6: 1077-1086.
30. **Nosek BA, Bar-Anan Y, Sriram N, Axt J, Greenwald AG.** Understanding and Using the Brief Implicit Association Test: Recommended Scoring Procedures. *PLOS ONE*. 2014; 9(12):e110938.
31. **Dehon E, Weiss N, Jones J, Faulconer W, Hinton E, Sterling S.** A Systematic Review of the Impact of Physician Implicit Racial Bias on Clinical Decision Making. *Academic Emergency Medicine*. 2017; 24(8):895-904.
32. **Greenwald AG, Smith CT, Sriram N, Bar-Anan Y, Nosek BA.** Implicit Race Attitudes Predicted Vote in the 2008 U.S. Presidential Election. *Analyses of Social Issues and Public Policy*. 2009; 9(1):241-53.

- 1  
2  
3  
4  
5  
6  
7  
8  
9  
10  
11  
12  
13  
14  
15  
16  
17  
18  
19  
20  
21  
22  
23  
24  
25  
26  
27  
28  
29  
30  
31  
32  
33  
34  
35  
36  
37  
38  
39  
40  
41  
42  
43  
44  
45  
46  
47  
48  
49  
50  
51  
52  
53  
54  
55  
56  
57  
58  
59  
60
33. **Jala S, Fry M, Elliott R.** Cognitive bias during clinical decision-making and its influence on patient outcomes in the emergency department: A scoping review. *Journal of Clinical Nursing*. 2023; 32(19-20):7076-85.
34. **Blanton H, Jaccard J, Klick J, Mellers B, Mitchell G, Tetlock PE.** Strong claims and weak evidence: Reassessing the predictive validity of the IAT. *Journal of Applied Psychology*. 2009; 94(3):567-82.
35. **McConnell AR, Leibold JM.** Weak criticisms and selective evidence: Reply to Blanton et al. (2009). *Journal of Applied Psychology*. 2009; 94(3):583-9.
36. **Ziegert JC, Hanges PJ.** Strong rebuttal for weak criticisms: Reply to Blanton et al. (2009). *Journal of Applied Psychology*. 2009; 94(3):590-7.
37. **Ogungbe O, Mitra AK, Roberts JK.** A systematic review of implicit bias in health care: A call for intersectionality. *IMC Journal of Medical Science*. 2019; 13.
38. **Featherston R, Downie LE, Vogel AP, Galvin KL.** Decision making biases in the allied health professions: A systematic scoping review. *PLOS ONE*. 2020; 15(10):e0240716.
39. **Peters, MDJ, Godfrey, CM, Khalil, H, McInerney, P, Parker, D, Bald-Soares, C.** Guidance for conducting systematic scoping reviews. Joanna Briggs Institute. [Online] 2015.  
<http://cfkr.dk/media/353553/Guidance%20for%20conducting%20systematic%20scoping%20reviews.pdf>.
40. **Godfrey, C.** Exploring the world “out there”: the use of scoping reviews in education research. 2020; pp. 859-860.
41. **Sarkis-Onofre, R., F. Catalá-López, E. Aromataris and C. Lockwood.** How to properly use the PRISMA Statement." *Systematic Reviews*. *Systematic Reviews* 2021; 10(1): p. 117.
42. **Tricco, AC, Lillie, E, Zarin, W. et al. Ann Intern Med.** PRISMA Extension for Scoping Reviews (PRISMA-ScR): Checklist and Explanation. *Ann Intern Med*, 2018; 169: 467-473.
43. **Briggs., Joanna.** Template source of Evidence details, Characteristics and results Extraction Instrument; 2020: Available at: JBI template source of evidence details, characteristics and results extraction instrument - JBI Manual for Evidence Synthesis. s.l. : Available at:  
<https://wiki.jbi.global/display/MANUAL/Appendix+11.1+JBI+template+source+of+evidence+details%2C+characteristics+and+results+extraction+instrument,2020>.
44. **Feldmann J, Puhan MA, Mütsch M.** Characteristics of stakeholder involvement in systematic and rapid reviews: a methodological review in the area of health services research. *BMJ open*. 2019; 9(8):e024587.
45. **Page, MJ, McKenzie JE, Bossuyt PM, Boutron I, Hoffmann TC, Mulrow CD, et al.** The PRISMA 2020 statement: an updated guideline for reporting systematic reviews. *BMJ*. 2021; 372:n71. doi: 10.1136/bmj.n71.
46. **Bradbury-Jones, C, Aveyard, H, Herberc, OR et al.** Scoping reviews: the PAGER framework for improving the quality of reporting. s.l. : *International Journal of Social Research Methodology.*, 2021. pp. 1-14.
47. **Crane, D.** Decisions to Treat Critically Ill Patients: A Comparison of Social Versus Medical Considerations. *The Milbank Memorial Fund Quarterly*. Health and Society. 1975; Vol. 53, No.1, pp1-33.
48. **Martin GP, Dixon-Woods M.** Can we tell whether hospital care is safe? *British Journal of Hospital Medicine*. 2014; 75(9):484-5.
49. **Martin GP, Aveling E-L, Campbell A, Tarrant C, Pronovost PJ, Mitchell I, et al.** Making soft intelligence hard: a multi-site qualitative study of challenges relating to voice about safety concerns. *BMJ Quality & Safety*. 2018; 27(9):710-7.

- 1  
2  
3  
4  
5  
6  
7  
8  
9  
10  
11  
12  
13  
14  
15  
16  
17  
18  
19  
20  
21  
22  
23  
24  
25  
26  
27  
28  
29  
30  
31  
32  
33  
34  
35  
36  
37  
38  
39  
40  
41  
42  
43  
44  
45  
46  
47  
48  
49  
50  
51  
52  
53  
54  
55  
56  
57  
58  
59  
60
50. **Feldman, HA. McKinlay, JB. Potter, DA. Freund, RB et al.** Nonmedical Influences on Medical Decision Making: An Experimental Technique using Videotapes, Factorial Design and Survey Sampling. *Health Services Research*. 1997; 32, 3, 344-366.
51. **Krupat, E. Irish, JT. Kasten, LE. et al.** Patient Assertiveness and Physician decision making among older breast cancer patients. *Social Science & Medicine*. 1999; 49, 449-457.
52. **Gordon, EJ. Sehgal, AR.** Patient-Nephrologist Discussions about Kidney Transplantation as a Treatment Option. *Advances in Renal Replacement Therapy*. 2000; 7, 2, 177-183.
53. **Mc Kinlay, JB. Freund, K. Moskowitz, M.** The Unexpected Influence of Physician Attributes on Clinical Decisions: Results of an Experiment. *Journal of Health and Social Behavior*. 2003; 43, 92-106.
54. **Tamayo-Saver, J. Dawson, NV. Hlnze, SW. et al.** The effect of race/ethnicity and desired social characteristics on physicians' decisions to prescribe opioid analgesics. *Acad Emerg Med*. 2003; 10, 11; 1239-1248 .
55. **Manderbacka, K.** Exploring gender and socioeconomic differences in the treatment of coronary heart disease. *European Journal of Public Health*. 2005; 15 (6), 634-639.
56. **Barnhart, JM. Cohen, O. Wright, N. et al.** Can Non-medical Factors Contribute to Disparities in Coronary Heart Disease Treatment? *Journal of Health Care for the Poor and Underserved*. 2006; 17(3), pp559-574.
57. **Denburg, TD. Kim, FJ. Flanigan, RC. Fairclough, D et al** The influence of patient race and social vulnerability on Urologist treatment recommendations in localised prostate cancer. *Med Care*. 2006; 44, 1137-1141.
58. **Bernheim, SM. Ross, JS. Krumbolz, HM, Bradley, EH.** Influence of patients' socioeconomic status on clinical management decisions: A Qualitative Study. *Annals of Family Medicine*. 2008; 6, 1, 53-59.
59. **Eggy, S. Albrecht, TL. Harper, WK.** Oncologists' recommendations of clinical trial participation to patients. *Patient education and counseling*. 2008. 70; 143-148.
60. **Nampiaparampil, DE. Nampiaparampil, JX. Harden, RN.** Pain and Prejudice. *Pain Management*. 2009; 10(4), 716-721.
61. **Ceballo, R. Abbey, A. Schooler, D.** Perceptions of women's infertility: what do physicians see? *Fertility and Sterility*. 2010; 93, 4: 1066-1073.
62. **Gilbert, A. Benjamin, A. Abenham, HA.** Does education level influence the decision to undergo elective repeat caesarean section among women with previous caesarean section? *Journal of Gynaecological Can*. 2010; 32, 10, 942-947.
63. **Hajjaj, FM. Salek, MS. Basra, MKA. et al.** Nonclinical influences, beyond diagnosis and severity, on clinical decision making in dermatology: understanding the gap between guidelines and practice. *British Journal of Dermatology*. 2010; 163:789-799.
64. **McKinlay et al.** An additional cause of health care disparities: the variable clinical decisions of primary care disparities: the variable clinical decisions of primary care doctors. *Journal of Evaluation in Clinical Practice*. 2013; 19, 664-673.
65. **Shawahna, R. Rahman, N. Ahmad, M et al.** Prescribers' perspectives of the socioeconomic status and important indicators affecting prescribing behavior in a developing country *Cent. Eur. J. Med*. 2012; 7(1), 129-136.
66. **Lay-Yee, R. Scott A. Davis, P.** Patterns of family doctor decision making in practice context. What are the implications for medical practice variation and social disparities? *Social Science and Medicine*. 2013; 76, 47-56.

- 1  
2  
3  
4  
5  
6  
7  
8  
9  
10  
11  
12  
13  
14  
15  
16  
17  
18  
19  
20  
21  
22  
23  
24  
25  
26  
27  
28  
29  
30  
31  
32  
33  
34  
35  
36  
37  
38  
39  
40  
41  
42  
43  
44  
45  
46  
47  
48  
49  
50  
51  
52  
53  
54  
55  
56  
57  
58  
59  
60
67. **Haider, AH. Schneider, EB. Siriam, N. et al.** Unconscious race and social class bias amongst acute care surgical clinicians and clinical treatment decisions. *JAMA Surgery*. 2015; 150, 5: 457-464.
68. **Williams, RL. Romney, C. Kano, M. et al.** Racial, Gender, and Socioeconomic Status Bias in Senior Medical Student Clinical Decision-Making: A National Survey. *J Gen Intern Med*. 2015; 30(6):758–67 .
69. **Popescu, I. Schrag, D. Ang, A. Wong, M.** Racial/Ethnic and Socioeconomic Differences in Colorectal and Breast Cancer Treatment Quality. *Med Care*. 2016; 54, 8, 780-788.
70. **Gonzales, FA. Sangaramoorthy, M. Dwyer, LA. et al.** Patient-clinician interactions and disparities in breast cancer care: the equality in breast cancer care study. *Journal of Cancer Survivorship*. 2019; 13, 968–980.
71. **Hirsh, AT. Miller, MM. Hollingshead, NA. et al.** A randomized controlled trial testing a virtual perspective-taking intervention to reduce race and SES disparities in pain care. *Pain*. 2019; 160(10): 2229–2240.
72. **Anastas, TM. Miller, MM. Hollingshead, NA. Stewart, JC. Rand, KL. Hirsh, AT.** The Unique and Interactive Effects of Patient Race, Patient Socioeconomic Status, and Provider Attitudes on Chronic Pain Care Decisions. *Ann. behav. med*. 2020; 54: 771–782.
73. **Bynum, M.** Community Health Centres Primary Care Physicians Asthmas Management Perceptions of Uninsured Patients. *Professional Case Management*. 2020; 25, 6:335-342 .
74. **Khidir, H. McWilliams, M. O'Mailey, J. Zaborski, L et al.** Analysis of Consistency in Emergency Department Physician Variation in Propensity for Admission Across Patient Sociodemographic Groups. *JAMA*. 2021; 4, 9, 1-8 .
75. **Brown, KH.** Descriptive and normative ethics: Class, context and confidentiality for mothers with HIV. *Social Science Medicine*, 1993; 36, 3: 195-202.
76. **Smith-Oka, V.** Bodies of risk: Constructing motherhood in a Mexican public hospital. *Social Science & Medicine*. 2012; 75, 2275-2282.
77. **Manzer, JL. Bell, AV.** “We’re a Little Biased”: Medicine and the Management. *Journal of Health and Social Behavior*. 2021, Vol. 62(2) 120–135.
78. **Agerstrom, J. Carlsson, M. Bremer, A. et al.** Discriminatory cardiac arrest care? Patients with low socioeconomic status receive delayed cardiopulmonary resuscitation and are less likely to survive an in-hospital cardiac arrest. *European Heart Journal*. 2021; 42,: 861-869 .
79. **Bernardes, SF. Tome-Pires, C. Brandao, T et al.** Classism in pain assessment and management: the mediating role of female patient dehumanization and perceived life hardship. *Pain*. 2021; 162, 12, 2854-2864.
80. **Bruno, BA. Guirguis, K. Rofaief, D et al.** Is Sociodemographic Status Associated with Empathic Communication and Decision Quality in Diabetes Care? *Journal of General Internal Medicine*. 2022; 37, 12, 3013-3019.
81. **Wilson, B.** Can patient lifestyle influence the management of pain? *Journal of Clinical Nursing*. 2008; 18, 399-408.
82. **Brandao, T. Campos, L. De Ruddere, L et al.** Classism in Pain Care: The Role of Patient Socioeconomic Status on Pain Medicine. 2019; 20 (11), 2094–2105.
83. **Diniz, D. Castro, P. Bousfield, A. et al.** Classism and dehumanization in chronic pain: A qualitative study of nurses’ inferences about women of different socio-economic status. *British Journal of Health Psychology*. 2020; 25, 152-170.
84. **MacCormick, R. E.** Decision making in cancer treatment: age and socio-economic status as independent variables. *Medical teacher*; 1990. Vol. 12 Issue 3/4, p353.

- 1 85. **Pettit, KE, Turner, JS, Kindrat, JK, et al.** Effect of Socioeconomic Status Bias on Medical Students–Patient  
2 Interactions Using an Emergency Medicine Simulation. *The Society for Emergency Medicine*. 2017; 1(2), 126-131.
- 3
- 4 86. **Goddu, AP, O’Conor, K, Lanzkron, S, et al.** Do Words Matter? Stigmatizing Language and the Transmission of Bias  
5 in the Medical Record. *J Gen Intern Med*. 2018; 33(5):685–91.
- 6
- 7 87. **Dougall, JL, Schwartz, RC.** The influence of client socioeconomic status on psychotherapist’s attributional biases  
8 and contertransference reactions. *American journal of psychotherapy*. 2011; 65,3, 249-265.
- 9
- 10 88. **Vliestra, T, Woodger, N, Morison, L.** Lower’ social class of a client evokes class self-awareness rather than  
11 discrimination in clinical reasoning: A video vignette study among British psychological and psychotherapeutic  
12 professionals working in the NHS. *Cancer Prevention Research*. 2020; Vols. 21, 335-347.
- 13
- 14
- 15 89. **Elholm Madsen, E, Morville, AL, Enemark Larsen, A, Hansen, T.** Is therapeutic judgement influenced by the  
16 patient’s socio-economic status? A factorial vignette survey. *Scandinavian Journal of Occupational Therapy*. 2014;  
17 23, 4, 245-252.
- 18
- 19
- 20 90. **Abuzour AS, Lewis PJ, Tully MP.** A qualitative study exploring how pharmacist and nurse independent  
21 prescribers make clinical decisions. *Journal of Advanced Nursing*. 2018; 74(1):65-74.
- 22
- 23 91. **Weiss MC.** The rise of non-medical prescribing and medical dominance. *Research in Social and Administrative*  
24 *Pharmacy*. 2021; 17(3):632-7.
- 25
- 26 92. **Mertens JF, Koster ES, Deneer VHM, Bouvy ML, van Gelder T.** Factors influencing pharmacists’ clinical decision  
27 making in pharmacy practice. *Research in Social and Administrative Pharmacy*. 2023; 19(9):1267-77.
- 28
- 29
- 30 93. **Mills T, Patel N, Ryan K.** Pharmacist non-medical prescribing in primary care. A systematic review of views,  
31 opinions, and attitudes. *International Journal of Clinical Practice*. 2021; 75(3):e13827.
- 32
- 33 94. **Evans SC, Roberts MC, Keeley JW, Blossom JB, Amaro CM, Garcia AM, et al.** Vignette methodologies for  
34 studying clinicians’ decision-making: Validity, utility, and application in ICD-11 field studies. *International Journal of*  
35 *Clinical and Health Psychology*. 2015; 15(2) 160-70.
- 36
- 37
- 38 95. **Sheringham J, Kuhn I, Burt J.** The use of experimental vignette studies to identify drivers of variations in the  
39 delivery of health care: a scoping review. *BMC Medical Research Methodology*. 2021; 21(1):81.
- 40
- 41 96. **Chen N, Hsu CHC, L. Pearce P.** Developing Video Vignettes for Tourism Research: Protocol and Quality Indicators.  
42 *Journal of Travel Research*. 2022; 61(8):1828-47.
- 43
- 44 97. **Kunesh CE, Noltemeyer A.** Understanding Disciplinary Disproportionality: Stereotypes Shape Pre-Service  
45 Teachers’ Beliefs About Black Boys’ Behavior. *Urban Education*. 2019; 54(4):471-98.
- 46
- 47 98. **Cheng AW, Chang J, O’Brien J, Budgazad MS, Tsai J.** Model Minority Stereotype: Influence on Perceived Mental  
48 Health Needs of Asian Americans. *Journal of Immigrant and Minority Health*. 2017; 19(3):572-81.
- 49
- 50 99. **Eckerd S, DuHadway S, Bendoly E, Carter CR, Kaufmann L.** On making experimental design choices: Discussions  
51 on the use and challenges of demand effects, incentives, deception, samples, and vignettes. *Journal of Operations*  
52 *Management*. 2021; 67(2):261-75.
- 53
- 54 100. **Matza LS, Stewart KD, Lloyd AJ, Rowen D, Brazier JE.** Vignette-Based Utilities: Usefulness, Limitations, and  
55 Methodological Recommendations. *Value in Health*. 2021; 24(6):812-21.
- 56
- 57
- 58
- 59
- 60



101. **Blodgett AT, Schinke RJ, Smith B, Peltier D, Pheasant C.** In Indigenous Words: Exploring Vignettes as a Narrative Strategy for Presenting the Research Voices of Aboriginal Community Members. *Qualitative Inquiry*. 2011; 17(6):522-33.
102. **Dovidio, JF. Fiske, ST.** Under the Radar: How Unexamined Biases in Decision Making Processes in Clinical Interactions Can Contribute to Health Care Disparities. *American Journal of Public Health*. 2012; 102, 5:945-949.
103. **Fiske, ST.** Intergroup biases: a focus on stereotype content, *Current Opinion in Behavioral Sciences*. 2015; 45-50, V3.
104. **Susan T. Fiske** Stereotype Content: Warmth and Competence Endure Current Directions in Psychological Science. 2018; 27:2, 67-73.
105. **Jenkins, AC. Karashchuk, P. Zhu, L. et al.** Predicting human behavior towards members of different social groups. *PNAS*. 2018; 115, 39: 9696-9701.
106. **Chase, D. Salani, R. Farley, J et al.** Unwittingly biased: A note to gynecologic cancer providers. *Gynecologic Oncology*. 2021; 160 (3) 646-648.
107. **Crandlemire, LA.** Unconscious Bias and the Impacts on caring: The Role of the Clinical Nursing Instructor. *International Journal for Human Caring*. 2020; 24 (2), 84-91.
108. **Burgess, JD.** Are Providers More Likely to Contribute to Healthcare Disparities Under Higher Levels of Cognitive Load? How features of the Healthcare Setting May Lead to Biases in Medical Decision Making. *Medical Decision Making*. 2010; 30: 246-257.
109. **Kirkham, M. Stapleton, H. Curtis, P. et al.** Stereotyping as a professional defence mechanism. *British Journal of Midwifery*. 2002; 10, 9:549-552.
110. **Gopaldas, Ahir. "Intersectionality 101."** *Journal of Public Policy & Marketing*, vol. 32, 2013, pp. 90–94. JSTOR, <http://www.jstor.org/stable/43305317>. Accessed 15 Oct. 2023.
111. **Murphy, KA. Ellison-Barnes, A. Johnson, EN. et al.** The Clinical Examination and Socially At-Risk Populations. *Med Clin N Am*. 2018; 102, 521-532.
112. **Gopal, DP. Chetty, U. O'Donnell, P. et al.** Implicit bias in healthcare: clinical practice, research and decision making. *Future Healthcare Journal*. 2021; 8, 1: 40-48.
113. **Durante F, Capozza D, Fiske ST.** The Stereotype Content Model: The Role Played by Competence in Inferring Group Status. *TPM Test Psychom Methodol Appl Psychol*. 2010; 17(4):187-199.
114. **Castaneda-Guarderas, A. Glassberg, J. Grudzen, CR. et al.** Shared Decision Making With Vulnerable Populations in the Emergency Department. *Academic Emergency Medicine*. 2016; 23 (12) 1410-1416.
115. **Hassan, S. M., L. Melville-Richards, A. Ring, J. Cloke, S. Smith, P et al.** "Minding the gap: The importance of active facilitation in moving boundary objects from in-theory to in-use as a tool for knowledge mobilisation. *SMM- Qualitative Research in Health*. 2023; 3.100235.
116. **Heffernan, M.** *Wilful Blindness*. 2019 and London., Simon and Schuster Uk Ltd.
117. **Hemley, E. Peters, K.** 10 Steps for avoiding health disparities in your practice. *The Journal of Family Practice*. 2004; 53(3),193-196.
118. **Government, Welsh.** Anti-Racist Wales Action Plan. 2022. Available at : [Anti-racist Wales Action Plan | GOV.WALES](https://gov.wales/anti-racist-wales-action-plan)

1  
2 119. **Samuriwo, R.** "Interprofessional Collaboration—Time for a New Theory of Action? *Frontiers in Medicine*. 2022  
3 and <https://www.frontiersin.org/articles/10.3389/fmed.2022.876715/full>, 9.  
4  
5  
6  
7

8 **Figure legend Caption**

9 Figure 1: Key terms and their operational definitions in this scoping review

10  
11 Figure 2: Prisma Flow Diagram  
12  
13  
14  
15  
16  
17  
18  
19  
20  
21  
22  
23  
24  
25  
26  
27  
28  
29  
30  
31  
32  
33  
34  
35  
36  
37  
38  
39  
40  
41  
42  
43  
44  
45  
46  
47  
48  
49  
50  
51  
52  
53  
54  
55  
56  
57  
58  
59  
60

For peer review only

Figure 1: Key terms and their operational definitions in this scoping review

| Key term                    | Operational Definition                                                                                                                                                                                                                                                                                                                                                                            |
|-----------------------------|---------------------------------------------------------------------------------------------------------------------------------------------------------------------------------------------------------------------------------------------------------------------------------------------------------------------------------------------------------------------------------------------------|
| Health Professional (HP)    | Any registered healthcare professional including Doctors, Surgeons, Nurses, Midwives, or Allied Healthcare Professionals.                                                                                                                                                                                                                                                                         |
| Clinical Decision-making    | A judgement or decision that influences any aspects of care organised or delivered by the HP such as choices made about the diagnostic tests, and referrals seeking specialist input. It also includes decisions about specific treatments such as surgical procedures, therapies, or medications, as well as ceasing or withdrawing active treatment.                                            |
| Socio Economic Status (SES) | Any single discrete measure of SES as set out in the Multiple Indices of Deprivation or the Multidimensions of Deprivation, including factors such as income, education, physical environment or neighbourhood quality, and health <sup>(14,15)</sup> . Any discrete measures that can be used as a proxy for the SES of a patient in HP decision-making such as income, unemployment, education. |

Figure 2: Prisma Flow Diagram

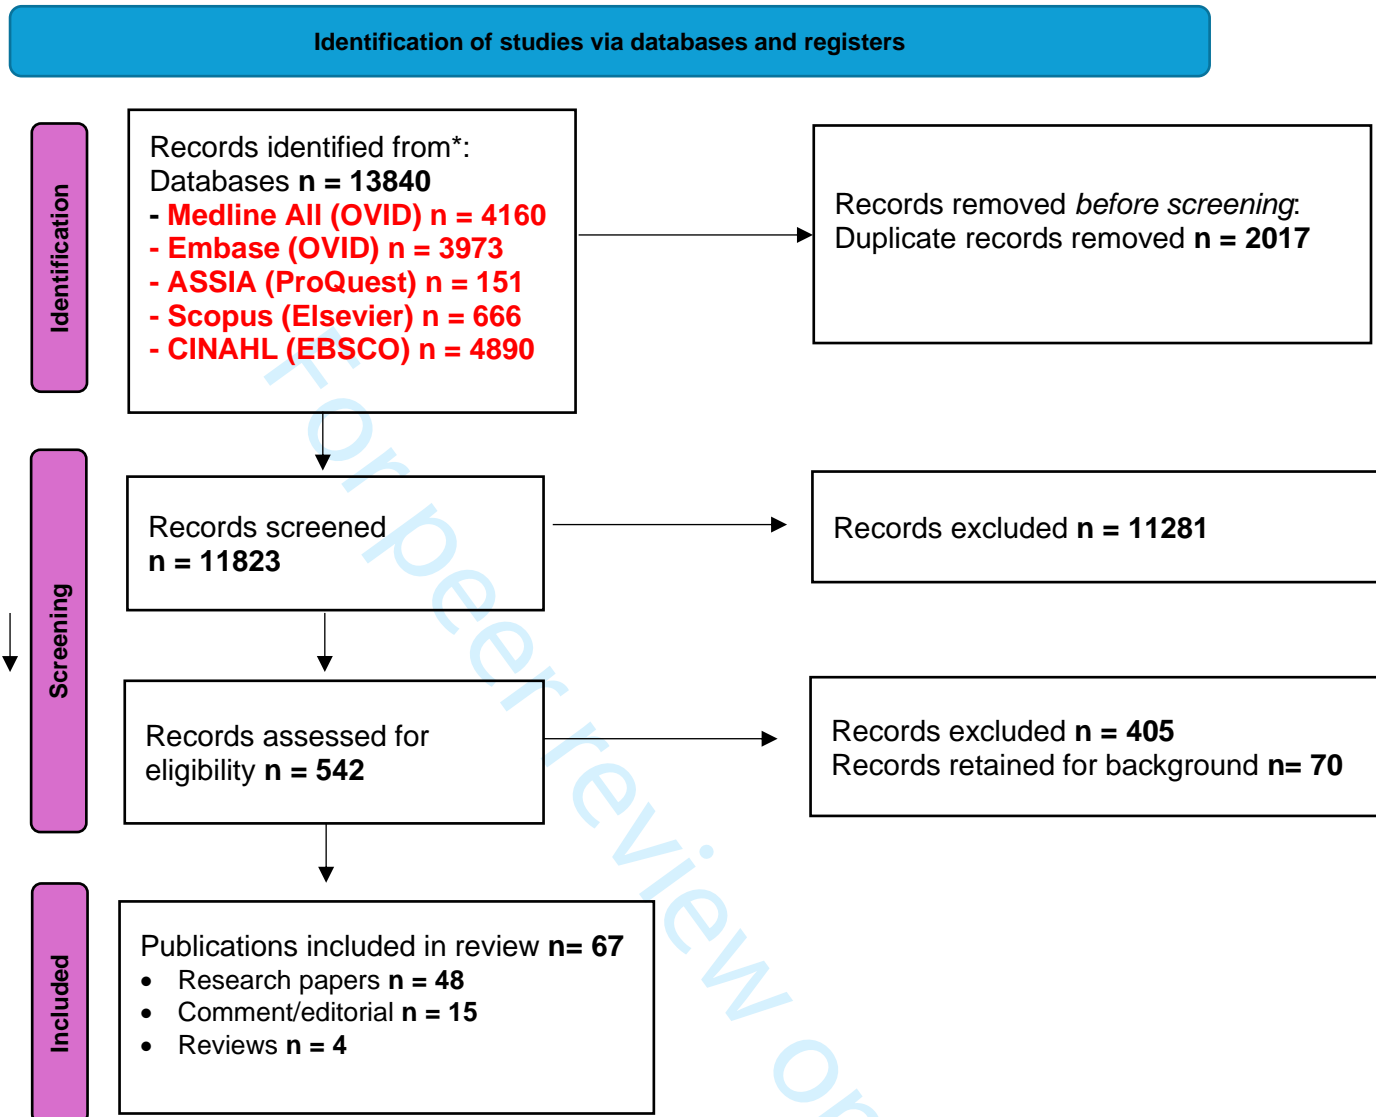

## **Supplementary Material – Search Strategies**

### **Medline ALL (OVIDSP): 1946 to present**

1. Socioeconomic Factors/
2. employment/
3. unemployment/
4. Economic Status/
5. Educational Status/
6. Medical Indigency/
7. exp Social Class/
8. exp Health Status Disparities/
9. exp Healthcare Disparities/
10. exp Poverty/
11. exp poverty areas/
12. ((social or socio economic or socioeconomic or economic or income) adj4 (deprivat\* or advantage\* or disadvantage\* or disparit\* or status or class or position or hierach\* or determinant\* or inequalit\* or inequit\* or barrier\* or circumstance\*)).tw.
13. ((education\* or employment) adj2 (status or level)).tw.
14. (sociodemographic or socio demographic or income or wealth or poverty or affluen\*).tw.
15. SES.tw.
16. 1 or 2 or 3 or 4 or 5 or 6 or 7 or 8 or 9 or 10 or 12 or 13 or 14 or 15
17. exp Clinical Decision-Making/
18. exp Decision Making/
19. Patient Care Management/
20. exp disease management/
21. ((Clinical or medical or health or treatment\*) adj2 (decision\* or decid\* or option\* or choice\*)).tw.
22. (treatment\* adj2 (select\* or recommend\* or receipt)).tw.
23. 17 or 18 or 19 or 20 or 21 or 22

- 1
- 2 24. exp Prejudice/
- 3
- 4 25. exp "Attitude of Health Personnel"/
- 5
- 6 26. exp Professional-Patient Relations/
- 7
- 8 27. exp Unconscious, Psychology/
- 9
- 10 28. "unconscious bias\*".tw.
- 11
- 12 29. ((Implicit or explicit) adj3 (cognition or bias\*)).tw.
- 13
- 14 30. prejudice.tw.
- 15
- 16 31. stereotyp\*.tw.
- 17
- 18 32. Classism.tw.
- 19
- 20 33. (treatment\* adj2 (unequal or differential)).tw.
- 21
- 22 34. (("Health professional\*" or nurse\* or doctor\* or clinician\* or physician\* or
- 23 registrar\* or intern\* or SHO\* or surgeon\* or student\* or AHP\* or allied or physio\* or
- 24 speech or occupational or Dietitian\* or therapist\* or radiographer\* or midwi\* or
- 25 "General Practitioner\*" or GP\*) adj3 (attitude or judg\* or bias)).tw.
- 26
- 27 35. exp Health Personnel/
- 28
- 29 36. exp Students, health occupations/
- 30
- 31 37. 35 or 36
- 32
- 33 38. exp Psychology, social/
- 34
- 35 39. exp Mental Processes/
- 36
- 37 40. 38 or 39
- 38
- 39 41. 37 and 40
- 40
- 41 42. 24 or 25 or 26 or 27 or 28 or 29 or 30 or 31 or 32 or 33 or 34 or 41
- 42
- 43 43. 16 and 23 and 42
- 44
- 45
- 46
- 47
- 48
- 49
- 50
- 51
- 52

### EMBASE (OVIDSP): 1947 to present

- 53 1. socioeconomic/
- 54
- 55 2. economic status/
- 56
- 57 3. income group/
- 58
- 59
- 60

- 1
- 2
- 3
4. poverty/
5. exp employment status/
6. exp educational status/
7. exp social status/
8. exp health care disparity/
9. exp health disparity/
10. ((social or socio economic or socioeconomic or economic or income) adj4 (deprivat\* or advantage\* or disadvantage\* or disparit\* or status or class or position or hierach\* or determinant\* or inequalit\* or inequit\* or barrier\* or circumstance\*).tw.
11. ((education\* or employment) adj2 (status or level)).tw.
12. (sociodemographic or socio demographic or income or wealth or poverty or affluen\*).tw.
13. SES.tw.
14. 1 or 2 or 3 or 4 or 5 or 6 or 7 or 8 or 9 or 10 or 11 or 12 or 13
15. exp clinical decision making/
16. exp medical decision making/
17. exp decision making/
18. patient care/
19. disease management/
20. ((Clinical or medical or health or treatment\*) adj2 (decision\* or decid\* or option\* or choice\*).tw.
21. (treatment\* adj2 (select\* or recommend\* or receipt)).tw.
22. 15 or 16 or 17 or 18 or 19 or 20 or 21
23. exp prejudice/
24. exp cognitive bias/
25. exp health personnel attitude/
26. exp professional-patient relationship/
27. exp ego development/
28. exp stereotypy/
29. prejudice.tw.

- 1
- 2 30. stereotyp\*.tw.
- 3
- 4 31. Classism.tw.
- 5
- 6 32. (treatment\* adj2 (unequal or differential)).tw.
- 7
- 8 33. (("Health professional\*" or nurse\* or doctor\* or clinician\* or physician\* or
- 9 registrar\* or intern\* or SHO\* or surgeon\* or student\* or AHP\* or allied or physio\* or
- 10 speech or occupational or Dietitian\* or therapist\* or radiographer\* or midwi\* or
- 11 "general practitioner\*" or GP\*) adj2 (attitude or judg\* or bias)).tw.
- 12
- 13
- 14 34. exp health care personnel/
- 15
- 16 35. exp health student/
- 17
- 18 36. 34 or 35
- 19
- 20 37. exp social psychology/
- 21
- 22 38. cognition/
- 23
- 24 39. mental function/
- 25
- 26 40. 37 or 38 or 39
- 27
- 28 41. 36 and 40
- 29
- 30 42. 23 or 24 or 25 or 26 or 27 or 28 or 29 or 30 or 31 or 32 or 33 or 41
- 31
- 32 43. 14 and 22 and 42
- 33
- 34 44. limit 43 to english language
- 35
- 36
- 37
- 38
- 39
- 40
- 41
- 42
- 43
- 44
- 45
- 46
- 47
- 48
- 49
- 50
- 51
- 52
- 53
- 54
- 55
- 56
- 57
- 58
- 59
- 60

### **ASSIA (Proquest): 1987 to present**

((MAINSUBJECT.EXACT.EXPLODE("Socioeconomic factors") OR  
 MAINSUBJECT.EXACT.EXPLODE("Socioeconomic indicators") OR  
 MAINSUBJECT.EXACT.EXPLODE("Socioeconomic conditions") OR  
 MAINSUBJECT.EXACT("Employment") OR  
 MAINSUBJECT.EXACT("Unemployment") OR MAINSUBJECT.EXACT("Poverty")  
 OR MAINSUBJECT.EXACT.EXPLODE("Low income people") OR ab((social  
 NEAR/4 (deprivat\* OR advantage\* OR disadvantage\* OR disparit\* OR status OR  
 class OR position OR hierach\* OR determinant\* OR inequalit\* OR inequit\* OR  
 barrier\* OR circumstance\*))) OR ab((socio economic NEAR/4 (deprivat\* OR  
 advantage\* OR disadvantage\* OR disparit\* OR status OR class OR position OR  
 hierach\* OR determinant\* OR inequalit\* OR inequit\* OR barrier\* OR  
 circumstance\*))) OR ab((socioeconomic NEAR/4 (deprivat\* OR advantage\* OR  
 disadvantage\* OR disparit\* OR status OR class OR position OR hierach\* OR





1 registrar\* OR intern\* OR sho\* OR surgeon\* OR student\* OR ahp\* OR allied  
 2 OR physio\* OR speech OR occupational OR dietitian\* OR therapist\* OR  
 3 radiographer\* OR midwi\* ) W/2 attitude\* ) ) OR ( TITLE-ABS-KEY ( ( "Health  
 4 professional" \* OR nurse\* OR doctor\* OR clinician\* OR physician\* OR  
 5 registrar\* OR intern\* OR sho\* OR surgeon\* OR student\* OR ahp\* OR allied  
 6 OR physio\* OR speech OR occupational OR dietitian\* OR therapist\* OR  
 7 radiographer\* OR midwi\* ) W/2 bias\* ) ) OR ( TITLE-ABS-KEY ( treatment\* W/2  
 8 ( unequal OR differential ) ) ) OR ( TITLE-ABS-KEY ( ( "Health professional" \*  
 9 OR nurse\* OR doctor\* OR clinician\* OR physician\* OR registrar\* OR intern\*  
 10 OR sho\* OR surgeon\* OR student\* OR ahp\* OR allied OR physio\* OR  
 11 speech OR occupational OR dietitian\* OR therapist\* OR radiographer\* OR  
 12 midwi\* OR "general practitioner\*" OR GP\* ) W/2 judg\* ) ) )

### 21 CINAHL (EBSCO): 1976 to present

22 S52 S16 AND S24 AND S50 Narrow by Language: - english

23 S51 S16 AND S24 AND S50

24 S50 S25 OR S26 OR S27 OR S28 OR S29 OR S30 OR S31 OR S32 OR S33 OR  
 25 S34 OR S35 OR S36 OR S37 OR S38 OR S39 OR S40 OR S41 OR S42 OR S49

26 S49 S45 AND S48

27 S48 S46 OR S47

28 S47 (MH "Mental Processes+")

29 S46 (MH "Psychology, Social+")

30 S45 S43 OR S44

31 S44 (MH "Students, Health Occupations+")

32 S43 (MH "Health Personnel+")

33 S42 AB (("Health professional\*" or nurse\* or doctor\* or clinician\* or physician\* or  
 34 registrar\* or intern\* or SHO\* or surgeon\* or student\* or AHP\* or allied or physio\* or  
 35 speech or occupational or Dietitian\* or therapist\* or radiographer\* or midwi\*) N2  
 36 (attitude or judg\* or bias\*))

37 S41 TI (("Health professional\*" or nurse\* or doctor\* or clinician\* or physician\* or  
 38 registrar\* or intern\* or SHO\* or surgeon\* or student\* or AHP\* or allied or physio\* or  
 39 speech or occupational or Dietitian\* or therapist\* or radiographer\* or midwi\* or  
 40 "general practitioner\*" or GP\*) N2 (attitude or judg\* or bias\*))

41 S40 AB (treatment\* N2 (unequal or differential))

42 S39 TI (treatment\* N2 (unequal or differential))

- 1  
2 S38 AB Classism  
3  
4 S37 TI Classism  
5  
6 S36 AB stereotyp\*  
7  
8 S35 TI stereotyp\*  
9  
10 S34 AB prejudice  
11  
12 S33 TI prejudice  
13  
14 S32 AB ((Implicit or explicit) N3 (cognition or bias\*))  
15  
16 S31 TI ((Implicit or explicit) N3 (cognition or bias\*))  
17  
18 S30 AB "unconscious bias\*"  
19  
20 S29 TI "unconscious bias\*"  
21  
22 S28 (MH "Unconscious (Psychology)")  
23  
24 S27 (MH "Professional-Patient Relations+")  
25  
26 S26 (MH "Attitude of Health Personnel+")  
27  
28 S25 (MH "Prejudice+")  
29  
30 S24 S17 OR S18 OR S19 OR S20 OR S21 OR S22 OR S23  
31  
32 S23 AB (treatment\* N2 (select\* or recommend\* or receipt))  
33  
34 S22 TI (treatment\* N2 (select\* or recommend\* or receipt))  
35  
36 S21 AB ((Clinical or medical or health or treatment\*) N2 (decision\* or decid\* or  
37 option\* or choice\*))  
38  
39 S20 TI ((Clinical or medical or health or treatment\*) N2 (decision\* or decid\* or  
40 option\* or choice\*))  
41  
42 S19 (MH "Disease Management")  
43  
44 S18 (MH "Decision Making+")  
45  
46 S17 (MH "Decision Making, Clinical+")  
47  
48 S16 S1 OR S2 OR S3 OR S4 OR S5 OR S6 OR S7 OR S8 OR S9 OR S10 OR  
49 S11 OR S12 OR S13 OR S14 OR S15  
50  
51 S15 AB SES  
52  
53 S14 TI SES  
54  
55 S13 AB (sociodemographic or socio demographic or income or wealth or poverty  
56 or affluen\*)  
57  
58  
59  
60

1  
2 S12 TI (sociodemographic or socio demographic or income or wealth or poverty or  
3 affluen\*)  
4

5 S11 AB ((social or socio economic or socioeconomic or economic or income) N4  
6 (deprivat\* or advantage\* or disadvantage\* or disparit\* or status or class or position or  
7 hierach\* or determinant\* or inequalit\* or inequit\* or barrier\* or circumstance\*))  
8  
9

10 S10 TI ((social or socio economic or socioeconomic or economic or income) N4  
11 (deprivat\* or advantage\* or disadvantage\* or disparit\* or status or class or position or  
12 hierach\* or determinant\* or inequalit\* or inequit\* or barrier\* or circumstance\*))  
13  
14

15 S9 (MH "Economic Status")  
16

17 S8 (MH "Poverty Areas")  
18

19 S7 (MH "Poverty+")  
20

21 S6 (MH "Healthcare Disparities")  
22

23 S5 (MH "Health Status Disparities")  
24

25 S4 (MH "Social Class+")  
26

27 S3 (MH "Unemployment")  
28

29 S2 (MH "Employment+")  
30

31 S1 (MH "Socioeconomic Factors+")  
32  
33  
34  
35  
36  
37  
38  
39  
40  
41  
42  
43  
44  
45  
46  
47  
48  
49  
50  
51  
52  
53  
54  
55  
56  
57  
58  
59  
60

## Supplementary Material 2. Scoping Review Data Extraction Tool

Adapted from the JBI Scoping Review Data Extraction tool<sup>20</sup>

| Scoping Review Details                                                               |                                                                                                                                                                                                                                                                                                                                                                                                          |
|--------------------------------------------------------------------------------------|----------------------------------------------------------------------------------------------------------------------------------------------------------------------------------------------------------------------------------------------------------------------------------------------------------------------------------------------------------------------------------------------------------|
| <b>Scoping Review title:</b>                                                         | Health Professionals implicit bias of patients with low socioeconomic status (SES) and its effects on clinical decision-making: A Systematic Scoping Review                                                                                                                                                                                                                                              |
| <b>Review objective/s:</b>                                                           | To scope the reported impact of HP bias about SES on clinical decision making and its effect on the care for people with lower SES in wider literature                                                                                                                                                                                                                                                   |
| <b>Review question/s:</b>                                                            | <ul style="list-style-type: none"> <li>• RQ1: What has been published about implicit SES bias and HP attitudes or behaviours when deciding/providing care.</li> <li>• RQ2: How does SES effect the dynamics of the HP and patient relationship?</li> <li>• RQ3: What recommendations for practice have been postulated, implemented, or evaluated to address HP implicit bias related to SES.</li> </ul> |
| Inclusion/Exclusion Criteria                                                         |                                                                                                                                                                                                                                                                                                                                                                                                          |
| <b>Population:</b> Adults                                                            |                                                                                                                                                                                                                                                                                                                                                                                                          |
| <b>Concept:</b> SES                                                                  |                                                                                                                                                                                                                                                                                                                                                                                                          |
| <b>Context:</b> HP decision making                                                   |                                                                                                                                                                                                                                                                                                                                                                                                          |
| <b>Types of publication or evidence source</b>                                       |                                                                                                                                                                                                                                                                                                                                                                                                          |
| Evidence source Details and Characteristics                                          |                                                                                                                                                                                                                                                                                                                                                                                                          |
| <b>Citation details (e.g., author/s, date, title, journal, volume, issue, pages)</b> |                                                                                                                                                                                                                                                                                                                                                                                                          |
| <b>Country</b>                                                                       |                                                                                                                                                                                                                                                                                                                                                                                                          |
| <b>Context – professional group</b>                                                  |                                                                                                                                                                                                                                                                                                                                                                                                          |
| <b>Disease group (if applicable)</b>                                                 |                                                                                                                                                                                                                                                                                                                                                                                                          |
| <b>Participants (details e.g., age/sex and number)</b>                               |                                                                                                                                                                                                                                                                                                                                                                                                          |
| <b>SES Terminology used.</b>                                                         |                                                                                                                                                                                                                                                                                                                                                                                                          |
| Details/Results extracted from source of evidence                                    |                                                                                                                                                                                                                                                                                                                                                                                                          |
| <b>SES effect on HP and patient relationship</b>                                     |                                                                                                                                                                                                                                                                                                                                                                                                          |

|                                                                                                                                                                                                                                              |                                                                                                                                                           |  |
|----------------------------------------------------------------------------------------------------------------------------------------------------------------------------------------------------------------------------------------------|-----------------------------------------------------------------------------------------------------------------------------------------------------------|--|
| 1<br>2<br>3<br>4<br>5<br>6                                                                                                                                                                                                                   | <b>Implicit biases, attitudes or behaviours that connect SES and decision making</b>                                                                      |  |
| 7<br>8<br>9<br>10<br>11<br>12<br>13<br>14                                                                                                                                                                                                    | <b>Healthcare professionals' decision making, and the impact of the decisions made<br/>Types of Healthcare professionals, care context and/or setting</b> |  |
| 15<br>16<br>17<br>18<br>19<br>20                                                                                                                                                                                                             | <b>Recommendations for practice to mitigate bias</b>                                                                                                      |  |
| 21<br>22<br>23<br>24<br>25<br>26<br>27<br>28<br>29<br>30<br>31<br>32<br>33<br>34<br>35<br>36<br>37<br>38<br>39<br>40<br>41<br>42<br>43<br>44<br>45<br>46<br>47<br>48<br>49<br>50<br>51<br>52<br>53<br>54<br>55<br>56<br>57<br>58<br>59<br>60 | <b>Identify how SES was measured in the included papers.</b>                                                                                              |  |

Table 3 Paper Characteristics

|   | Author(s)<br>date<br>Country         | Type of Publication<br>Research<br>design/method<br>(If applicable)                                                                          | Aim(s)<br>(If stated)                                                                                                                     | Population<br>Professional<br>Specialty                    | Concept<br>SES Measure                                                                                                                                             | Context<br>Link HP<br>Bias &<br>Decision-<br>making | Key results, findings, or information                                                                                                                                                                                                                                                                                                                                                                                                                    |
|---|--------------------------------------|----------------------------------------------------------------------------------------------------------------------------------------------|-------------------------------------------------------------------------------------------------------------------------------------------|------------------------------------------------------------|--------------------------------------------------------------------------------------------------------------------------------------------------------------------|-----------------------------------------------------|----------------------------------------------------------------------------------------------------------------------------------------------------------------------------------------------------------------------------------------------------------------------------------------------------------------------------------------------------------------------------------------------------------------------------------------------------------|
| 1 | Crane (1975)<br>USA                  | <b>Research Paper</b><br>Vignette case studies<br>and Questionnaire                                                                          | To assess the<br>appropriateness of<br>social as compared to<br>physiological criteria in<br>deciding to treat<br>critically ill patient. | <b>Doctors</b><br>Internal<br>Medicine and<br>Neurosurgery | Case studies based on<br>occupation and employment. A<br>Banker and an unemployed<br>Labourer.                                                                     | <b>Yes</b>                                          | Doctors did differentiate between a patient with a high and low status<br>occupation when making decisions about the aggressiveness of treatment<br>offered. However, when asked to rank the relative influence of social<br>characteristics upon their decisions to treat chronically ill patients, they<br>ranked social criteria as having a low influence on their decision-making.                                                                  |
| 2 | Eisenberg (1979)<br>USA              | <b>Editorial/Comment</b><br>NA                                                                                                               | Sociologic Influences<br>on Decision-Making by<br>Clinicians                                                                              | <b>Doctors</b><br>Specialism<br>not<br>specified.          | This paper reviews the<br>contributions to our<br>understanding of sociologic<br>influences on clinical decision-<br>making.                                       | <b>NA</b>                                           | The bulk of the available literature implies a significant relation between<br>social class and decisions regarding patient management. Further<br>investigation is needed- various methods of sociologic research could be<br>used to provide the data for these studies e.g., participant observation,<br>record review, questionnaires, interviews, case studies, or direct recording<br>of the interaction.                                          |
| 3 | MacCormick et<br>al (1990)<br>Canada | <b>Research Paper</b><br>Vignette – Four clinical<br>scenarios                                                                               | To assess decision-<br>making in cancer<br>treatments using age<br>and SES as<br>independent variables.                                   | <b>Medical<br/>Students</b>                                | Occupation and employment<br>were used as a proxy for SES. In<br>this study SES was assessed<br>with age. and it is difficult to<br>separate these in the results. | <b>Yes</b>                                          | Personal bias of the physician plays a role in decision-making about<br>treatment for cancer in these vignettes. It is difficult to separate age and<br>SES these in the results.<br>Statistically significant differences $p < 0.001$ in decisions to treat younger<br>professional than older persons.<br>Statistically significant differences $p < 0.001$ in decisions to treat a young<br>mother than a young female “mentally handicapped” person. |
| 4 | Brown (1993)<br>USA                  | <b>Research Paper</b><br>Interviews and focus<br>groups. seventy-two<br>health, social work,<br>administrative research,<br>and advocacy HPs | Exploration of class and<br>confidentiality for<br>mothers with HIV.                                                                      | <b>Multi-<br/>professional<br/>Obstetrics:</b>             | Income                                                                                                                                                             | <b>Yes</b>                                          | Lower social class people not viewed as holding their confidentiality as a<br>personal priority - it matters less to them.<br>Mums with greater authority due to income, political or social standings can<br>expect greater confidentiality compared to mothers who are less<br>economically fortunate.                                                                                                                                                 |
| 5 | McKinlay et al<br>(1996)<br>USA      | <b>Research Paper</b><br>Vignette video scenarios<br>1. Chest pain<br>2. Dyspnoea                                                            | To assess non-medical<br>influences on decision-<br>making.                                                                               | <b>Doctors</b><br>coronary<br>heart<br>disease.            | socioeconomic status, and<br>health insurance coverage.                                                                                                            | <b>Yes</b>                                          | A link found between insurance coverage on cardiac diagnosis for chest<br>pain, particularly in the older patients. Intersectionality with Age.<br>Among the older patients, those with insurance were significantly more<br>likely to receive the primary cardiac diagnosis than those without<br>insurance, whereas among younger patients’ insurance had no effect.                                                                                   |
| 6 | McKinlay et al.<br>(1997)<br>USA     | <b>Research Paper</b><br>Vignette cancer video<br>scenarios involving a<br>breast mass                                                       | To assess non-medical<br>influences on decision-<br>making                                                                                | <b>Doctors</b><br>Breast<br>Cancer                         | Patient characteristics were<br>varied in the videotapes to<br>indicate socioeconomic                                                                              | <b>Yes</b>                                          | Women of lower SES were more likely to receive less aggressive care<br>( $p < 0.07$ ). physicians recommended either chemotherapy or tamoxifen to<br>73% of higher SES women, compared with 53% of lower SES women.                                                                                                                                                                                                                                      |

| Author(s)<br>date<br>Country               | Type of Publication<br>Research<br>design/method<br>(If applicable)                                                     | Aim(s)<br>(If stated)                                                                                                                                                                                                          | Population<br>Professional<br>Specialty           | Concept<br>SES Measure                                                                                                                                                                                                                                                                                                                                                                                                                                                                                                            | Context<br>Link HP<br>Bias &<br>Decision-<br>making | Key results, findings, or information                                                                                                                                                                                                                                                                                                        |
|--------------------------------------------|-------------------------------------------------------------------------------------------------------------------------|--------------------------------------------------------------------------------------------------------------------------------------------------------------------------------------------------------------------------------|---------------------------------------------------|-----------------------------------------------------------------------------------------------------------------------------------------------------------------------------------------------------------------------------------------------------------------------------------------------------------------------------------------------------------------------------------------------------------------------------------------------------------------------------------------------------------------------------------|-----------------------------------------------------|----------------------------------------------------------------------------------------------------------------------------------------------------------------------------------------------------------------------------------------------------------------------------------------------------------------------------------------------|
|                                            |                                                                                                                         |                                                                                                                                                                                                                                |                                                   | status: dress, grammatical style, and insurance status                                                                                                                                                                                                                                                                                                                                                                                                                                                                            |                                                     | Insurance and ability to pay also were associated with disparity in physician recommendations.                                                                                                                                                                                                                                               |
| 7<br>Feldman et al<br>1997<br>ML...<br>USA | <b>Research Paper</b><br>An Experimental<br>Technique Using<br>Videotapes, Factorial<br>Design, and Survey<br>Sampling. | To assess non-medical<br>influences on decision-<br>making.                                                                                                                                                                    | <b>Doctors</b><br>Secondary<br>care               | Challenging to ascertain how<br>SES was measured or<br>described                                                                                                                                                                                                                                                                                                                                                                                                                                                                  | <b>No</b>                                           | The data suggest that the physician subjects gave clinically valid answers to the questions and that the variations in clinical decision-making identified by the factorial experiment can be interpreted as generalizable differences.                                                                                                      |
| 8<br>Wolder-Leven et al<br>1998<br><br>USA | <b>Editorial/Comment</b><br>Social Class and<br>Medical Decision-<br>making                                             | People of different<br>classes may receive<br>differential treatment<br>from providers for the<br>same health conditions<br>due to discrimination<br>based on class.                                                           | <b>Doctors</b><br>Specialism<br>not<br>specified. | Paper discusses SES measures<br>- as indicators of class. The<br>word class works as a<br>shorthand to refer to a person's<br>social location, a "lived<br>reality," in which life chances,<br>values, health and well-being,<br>morbidity and mortality, and<br>concepts of self, other, and<br>collectively are shaped by the<br>relationship of the individual to<br>the social organization of<br>production. Should stop trying<br>to define class in terms of a set<br>of socioeconomic indicators<br>such as income level. | <b>NA</b>                                           | it is important to recognize that giving people the same choices about medical treatments does not necessarily mean that they are being treated equally, because patients do not lead equal lives. At the point of medical decision-making it becomes clear that class-based differences can even lead to difference between life and death. |
| 9<br>Parens 1998<br>USA                    | <b>Editorial/Comment</b><br>Social Class and<br>Medical Decision-<br>making.                                            | Bioethicists often<br>discuss issues of social<br>class in relation to<br>access to health<br>services - bioethics<br>literature reveals that<br>class is rarely a focus<br>in the analysis of<br>medical decision-<br>making. | <b>Doctors</b><br>Specialism<br>not<br>specified. | Considering a person's SES<br>might lead to not offering<br>treatment to a person who<br>does not have the resources<br>and only offering it to people<br>with those resources. An<br>understanding of class and its<br>relationship to medical<br>decision-making should be<br>used to provide equity and not<br>to explain away unwarranted<br>variations in care.                                                                                                                                                              | <b>NA</b>                                           | Health care providers need to listen to patients in unaccustomed ways, the next and much bigger step will be to think systematically about how to promote such listening particularly with time constraints on health professionals.                                                                                                         |



| Author(s)<br>date<br>Country         | Type of Publication<br>Research<br>design/method<br>(If applicable)                                                       | Aim(s)<br>(If stated)                                                                                                                   | Population<br>Professional<br>Specialty    | Concept<br>SES Measure                                                                                                                                 | Context<br>Link HP<br>Bias &<br>Decision-<br>making | Key results, findings, or information                                                                                                                                                                                                                                                                                                                                                                                                                                                                                                                                                  |
|--------------------------------------|---------------------------------------------------------------------------------------------------------------------------|-----------------------------------------------------------------------------------------------------------------------------------------|--------------------------------------------|--------------------------------------------------------------------------------------------------------------------------------------------------------|-----------------------------------------------------|----------------------------------------------------------------------------------------------------------------------------------------------------------------------------------------------------------------------------------------------------------------------------------------------------------------------------------------------------------------------------------------------------------------------------------------------------------------------------------------------------------------------------------------------------------------------------------------|
| 10<br>Krupat et al 1999<br>USA       | Research Paper<br>Vignette – Video                                                                                        | To determine whether assertive patient behaviour influences physician decision-making in the treatment of older breast cancer patients. | Doctors<br>Cancer                          | Socioeconomic status [as well as age, race, mobility, general health, and assertive behaviour] of the patients were varied.                            | Yes                                                 | Assertive behaviour on behalf of a women with lower SES helps them to get testing e.g., auxiliary node biopsy. Assertiveness led to more careful diagnostic testing for patients who came from groups that are "disadvantaged."                                                                                                                                                                                                                                                                                                                                                        |
| 11<br>Gordon et al<br>2000<br>USA    | Research Paper<br>Cross-sectional study design, interviews using semi-structured questionnaire of physicians and patents. | An assessment of Patient-Nephrologist discussions about kidney transplantation as a treatment option                                    | Doctors<br>Haemodialysis and Nephrologists | SES determined by education level, occupational level, and socioeconomic status level. All low to high rated.                                          | Yes                                                 | Bias is not overtly discussed however finding show fewer medical explanations and less time spent with patients of Low SES. Patient age and socioeconomic status influence discussions of transplantation as a treatment option. low socioeconomic status patients were less likely to report being encouraged even after adjustment for transplant suitability.                                                                                                                                                                                                                       |
| 12<br>Van-Ryn et al<br>2000<br>USA   | Research Paper<br>Survey data examined                                                                                    | The degree to which patient race and socioeconomic status effects physicians' perceptions of patients                                   | Doctors<br>post-angiogram care.            | A three-category measure of SES was developed. The SES index was created by standardizing patient income and education and averaging the two together. | Yes                                                 | Intersectionality with race is difficult to unpick. Low SES patients viewed as less likely to be pleasant and rationale. physicians gave lower SES patients more negative ratings on personality characteristics (lack of self-control, irrationality) and level of intelligence.                                                                                                                                                                                                                                                                                                      |
| 13<br>McKinlay et al<br>2002<br>USA  | Research Paper<br>Vignette video study<br>1. Polymyalgia<br>2. Depression                                                 | To assess the influence of non-medical factors on decision-making.                                                                      | Doctors<br>Internalist and primary care    | SES depicted by appearance and employment in the video vignettes                                                                                       | No                                                  | SES of the patient does not show any impact on decision-making.                                                                                                                                                                                                                                                                                                                                                                                                                                                                                                                        |
| 14<br>Tamayo-Sarver<br>(2003)<br>USA | Research Paper<br>Vignette<br>1. Ankle Fracture<br>2. Migraine<br><br>Non-traumatic back pain.                            | To measure the Effect of Race/Ethnicity and Desirable Social Characteristics on Physicians Decisions to Prescribe Opioid Analgesics     | Doctors<br>Emergency Department            | Occupation and/or relationship with a primary care provider.                                                                                           | Yes                                                 | Race did not impact on prescribing differences. SES and information about patient social desirability (e.g., occupation) increased the rates of prescribing for the migraine and back pain patient vignette, but this did not alter the rate for ankle fracture. There were statistically discernible increases in the rate of prescribing, 4% (p<0.04) for migraine and 6% (p<0.01) for back pain. The information on socially desirable characteristics may have affected physicians' perceived likelihood that the patient is feigning illness and surreptitiously seeking opioids. |

| Author(s)<br>date<br>Country         | Type of Publication<br>Research<br>design/method<br>(If applicable)                                             | Aim(s)<br>(If stated)                                                                                                                            | Population<br>Professional<br>Specialty           | Concept<br>SES Measure                                                                                                                                                                                                                                                                                                                 | Context<br>Link HP<br>Bias &<br>Decision-<br>making | Key results, findings, or information                                                                                                                                                                                                                                                                                                               |
|--------------------------------------|-----------------------------------------------------------------------------------------------------------------|--------------------------------------------------------------------------------------------------------------------------------------------------|---------------------------------------------------|----------------------------------------------------------------------------------------------------------------------------------------------------------------------------------------------------------------------------------------------------------------------------------------------------------------------------------------|-----------------------------------------------------|-----------------------------------------------------------------------------------------------------------------------------------------------------------------------------------------------------------------------------------------------------------------------------------------------------------------------------------------------------|
| 15<br>Henley et al 2004<br>USA       | <b>Editorial/Comment</b><br>10 steps for avoiding<br>health disparities in your<br>practice                     | Discussion about<br>disparities and health<br>inequalities.                                                                                      | <b>Doctors</b><br>Specialism<br>not<br>specified. | Discusses intersectionality.<br>The evidence regarding<br>differences in the care of<br>patients based on race,<br>ethnicity, gender, and<br>socioeconomic status<br>suggests that if this patient is a<br>woman or African American or<br>from<br>a lower socioeconomic class,<br>resultant morbidity or mortality<br>will be higher. | <b>NA</b>                                           | Recommends that minimising the effect of bias and stereotyping could be<br>achieved for all patients by using evidence-based practice guidelines.                                                                                                                                                                                                   |
| 16<br>Manderbacka<br>2005<br>Finland | <b>Research Paper</b><br>Exploratory qualitative<br>study                                                       | Trace key points in the<br>treatment where<br>patients gender & SES<br>experience differences                                                    | <b>Doctors</b><br>Coronary<br>heart<br>disease.   | Blue-collar and white-collar<br>occupations                                                                                                                                                                                                                                                                                            | <b>Yes</b>                                          | There was a doctor-centred model common among blue-collar workers and<br>an increased patient centred model with shared decision-making common<br>among those using private care 'white collar occupations. The utilization of<br>private care is clearly concentrated in higher socioeconomic groups in<br>Finland.                                |
| 17<br>Arber et al 2006<br>UK         | <b>Research Paper</b><br>A video-simulation<br>experiment.<br>Conducted<br>simultaneously in both<br>USA and UK | Patient characteristics<br>and inequalities in<br>doctors' diagnostic and<br>management strategies<br>relating to CHD.                           | <b>Doctors</b><br>Coronary<br>heart disease       | SES indicated by occupation<br>and dress - middle class<br>(schoolteacher) or working<br>class (cleaner in UK; janitor in<br>US). Class was also expressed<br>by style of dress and<br>appearance.                                                                                                                                     | <b>No</b>                                           | Class was not significantly associated with any aspect of doctors'<br>information gathering or decision-making.                                                                                                                                                                                                                                     |
| 18<br>Barnhart et al<br>2006<br>USA  | <b>Research Paper</b><br>Questionnaires<br>developed from focus<br>groups.                                      | Can Non-medical<br>Factors Contribute to<br>Disparities in Coronary<br>Heart disease<br>treatments.                                              | <b>Doctors</b><br>coronary<br>heart disease       | socioeconomic status<br>discussed in terms of finance<br>barriers - social support<br>(ability/insurance to pay for a<br>revascularization procedure)<br>as judged by the physician.                                                                                                                                                   | <b>Yes</b>                                          | People with low SES were not trusted by the physician. Patients most<br>knowledgeable (and assertive) about the procedure, and those with<br>resources, who were most likely to adopt a healthy lifestyle (as perceived by<br>the physician) are most likely to receive recommendations for<br>revascularisation.                                   |
| 19<br>Denburg et al<br>2006<br>USA   | <b>Research Paper</b><br>Randomised, 2X2<br>factorial design clinical<br>vignette.                              | The Influence of Patient<br>Race and Social<br>Vulnerability on<br>Urologist Treatment<br>Recommendations in<br>Localized Prostate<br>Carcinoma. | <b>Doctors</b><br>Cancer                          | Middle income (and married)<br>Low Income (and widowed)<br>therefore the variables were<br>not distinct.                                                                                                                                                                                                                               | <b>Yes</b>                                          | Watchful waiting offered more frequently for socially vulnerable patients<br>(low income and widowed) - both white and black patients. Intersectionality<br>means that low income/widowed black patients received the lowest referral<br>for radical prostatectomy. Low income/widowed white men also received<br>lower referral for prostatectomy. |

|    | <b>Author(s)<br/>date<br/>Country</b> | <b>Type of Publication<br/>Research<br/>design/method<br/>(If applicable)</b>                                                                                                                                                                          | <b>Aim(s)<br/>(If stated)</b>                                                                                                                                                                                                                                                                                                  | <b>Population<br/>Professional<br/>Specialty</b>      | <b>Concept<br/>SES Measure</b>                                                                                                                                  | <b>Context<br/>Link HP<br/>Bias &amp;<br/>Decision-<br/>making</b> | <b>Key results, findings, or information</b>                                                                                                                                                                                                                                                                                                                                |
|----|---------------------------------------|--------------------------------------------------------------------------------------------------------------------------------------------------------------------------------------------------------------------------------------------------------|--------------------------------------------------------------------------------------------------------------------------------------------------------------------------------------------------------------------------------------------------------------------------------------------------------------------------------|-------------------------------------------------------|-----------------------------------------------------------------------------------------------------------------------------------------------------------------|--------------------------------------------------------------------|-----------------------------------------------------------------------------------------------------------------------------------------------------------------------------------------------------------------------------------------------------------------------------------------------------------------------------------------------------------------------------|
| 20 | Bernheim et al<br>2008<br>USA         | <b>Research Paper</b><br>A Qualitative Study semi<br>structured interviews                                                                                                                                                                             | Influence of Patients'<br>Socioeconomic Status<br>on Clinical<br>Management<br>Decisions.                                                                                                                                                                                                                                      | <b>Doctors</b><br>Primary care                        | As described by the<br>participants: Economic<br>Uninsured - Unemployed- On<br>welfare- Sociocultural- Low<br>educational achievement- Poor<br>social networks. | <b>Yes</b>                                                         | All physicians recounted circumstances in which the patient's SES did<br>affect their clinical management decisions. Even physicians who initially<br>asserted that all patients in their practice received identical care later<br>described differences based on patient SES.                                                                                             |
| 21 | Eggleston et al 2008<br>USA           | <b>Research Paper</b><br>Video recorded<br>outpatient interactions<br>during which<br>oncologists invited<br>patients to participate in<br>clinical trials.                                                                                            | Oncologists'<br>recommendations of<br>clinical trial<br>participation to patients                                                                                                                                                                                                                                              | <b>Doctors</b><br>cancer                              | SES determined by education:<br>high school or less<br>technical or trade school<br>college or greater.                                                         | <b>No</b>                                                          | Data showed that people with higher education (0.07) received more<br>recommendations than men and those with lower education. This was not<br>statistically significant.                                                                                                                                                                                                   |
| 22 | Ling Fan et al<br>2008<br>USA         | <b>Review</b><br>A search of the Internet<br>identified thousands of<br>Web sites, documents,<br>reports, and educational<br>materials pertaining to<br>health and pain<br>disparities.                                                                | Awareness and Action<br>for Eliminating Health<br>Care Disparities in Pain<br>Care: Web-Based                                                                                                                                                                                                                                  | <b>Multi-<br/>professional</b><br>Palliative<br>care. | Paper discusses SES                                                                                                                                             | <b>NA</b>                                                          | Studies have explored the factors influencing the often-unintentional<br>pervasive nature of biases and stereotyping that affect treatment decisions<br>for managing pain. Discriminatory practices that are deep seated in biases,<br>stereotypes, and uncertainties around communication and decision-<br>making processes contributing to inequities in care.            |
| 23 | Franks et al 2008<br>USA              | <b>Editorial/Comment</b><br>This paper examines a<br>hierarchy of three<br>domains for<br>interventions to address<br>health inequalities<br>downstream.<br>1. health system<br>2. provider-patient<br>interactions<br>3. clinical decision-<br>making | Upstream or<br>fundamental causes<br>(such as poverty,<br>limited education, and<br>compromised<br>healthcare access) is<br>essential to reduce<br>healthcare disparities.<br>But such approaches<br>are not sufficient, and<br>downstream<br>interventions,<br>addressing the<br>consequences of those<br>fundamental causes. | <b>Doctors</b><br>Specialism<br>not<br>specified.     | Paper discusses SES                                                                                                                                             | <b>NA</b>                                                          | Physician biases likely to contribute to disparities. Greater social and<br>cultural distance between providers and patients increases the potential for<br>suboptimal encounters. Patients at greater social risk for adverse health<br>outcomes have encounters characterized by<br>less patient participation and providers viewing those encounters more<br>negatively. |

|    | <b>Author(s)<br/>date<br/>Country</b> | <b>Type of Publication<br/>Research<br/>design/method<br/>(If applicable)</b>                                                                                                                             | <b>Aim(s)<br/>(If stated)</b>                                                                                                                                                                                                                     | <b>Population<br/>Professional<br/>Specialty</b>     | <b>Concept<br/>SES Measure</b>                                                                                                                                                                              | <b>Context<br/>Link HP<br/>Bias &amp;<br/>Decision-<br/>making</b> | <b>Key results, findings, or information</b>                                                                                                                                                                                                                                                                           |
|----|---------------------------------------|-----------------------------------------------------------------------------------------------------------------------------------------------------------------------------------------------------------|---------------------------------------------------------------------------------------------------------------------------------------------------------------------------------------------------------------------------------------------------|------------------------------------------------------|-------------------------------------------------------------------------------------------------------------------------------------------------------------------------------------------------------------|--------------------------------------------------------------------|------------------------------------------------------------------------------------------------------------------------------------------------------------------------------------------------------------------------------------------------------------------------------------------------------------------------|
| 24 | Nampiaparampil et al 2009<br>USA      | <b>Research Paper</b><br>Vignette - double-blinded randomized controlled study. 1. patient with chronic low back. 2. lower extremity pain                                                                 | To assess the contribution of non-medical decision-making to the assessment and management of pain.                                                                                                                                               | <b>Doctors</b><br>rehabilitation community hospitals | Medical insurance<br>Blue Cross Vs Medicaid                                                                                                                                                                 | <b>Yes</b>                                                         | Unable to unpick race and insurance status in these vignette examples. Patient ethnicity/SES differences in the prescription of morphine (p = 0.053). Patient ethnicity/SES significantly affected the rate of referral for a nerve block (P = 0.04).                                                                  |
| 25 | Wilson 2009<br>UK                     | <b>Research Paper</b><br>Vignette – case scenarios. One of two patient scenarios was employed in a self-administered questionnaire                                                                        | Scenarios and Questionnaires addressed pain knowledge, inferences of physical pain, general attitudes, and beliefs about pain management. The participants were required to identify the patient’s pain level and make pain management decisions. | <b>Nurses</b><br>pain                                | The variable lifestyle/socio-economic status (SES) of the patient was manipulated; all other patient variables were kept constant.<br>High SES - businessperson<br>Low SES - unemployed construction worker | <b>Yes</b>                                                         | There was a difference in pain management between high and low SES patients - both general and CNS nurses showed inferences of patient pain and management decisions which are based on myths about Low SES addiction. There was an observed trend to be more likely to under medicate low SES over high SES patients. |
| 26 | Ceballo et al 2010<br>USA             | <b>Research Paper</b><br>A three-page survey was mailed to physicians in one state. Case scenario of a young women trying to get pregnant. The patient’s race and social class varied across the surveys. | Surveyed about their knowledge of infertility among different demographic groups of women and examines how patient and physician characteristics may influence physicians’ treatment responses to hypothetical infertile patients.                | <b>Doctors</b><br>Family planning                    | Different educational groups were used to reflect social class differences among women.                                                                                                                     | <b>No</b>                                                          | Referral practices did vary related to insurance status of the patient. Physicians’ reluctance to refer Medicaid patients to infertility specialists is explained as understandable given the great expense of specialized infertility services and the lack of Medicaid insurance coverage for such services.         |

|    | <b>Author(s)<br/>date<br/>Country</b>            | <b>Type of Publication<br/>Research<br/>design/method<br/>(If applicable)</b>                                                                                   | <b>Aim(s)<br/>(If stated)</b>                                                                                                                                                                                     | <b>Population<br/>Professional<br/>Specialty</b> | <b>Concept<br/>SES Measure</b>                                   | <b>Context<br/>Link HP<br/>Bias &amp;<br/>Decision-<br/>making</b> | <b>Key results, findings, or information</b>                                                                                                                                                                                                                                                                                                                                                                                                                                                                                                                                                                                                         |
|----|--------------------------------------------------|-----------------------------------------------------------------------------------------------------------------------------------------------------------------|-------------------------------------------------------------------------------------------------------------------------------------------------------------------------------------------------------------------|--------------------------------------------------|------------------------------------------------------------------|--------------------------------------------------------------------|------------------------------------------------------------------------------------------------------------------------------------------------------------------------------------------------------------------------------------------------------------------------------------------------------------------------------------------------------------------------------------------------------------------------------------------------------------------------------------------------------------------------------------------------------------------------------------------------------------------------------------------------------|
| 27 | Gilbert et al 2010<br>Canada                     | <b>Research Paper</b><br>A retrospective cohort study of women with a previous Caesarean section.                                                               | Does Education Level Influence the Decision to Undergo Elective Repeat Caesarean Section Among Women with a Previous Caesarean Section.                                                                           | <b>Doctors</b><br>Obstetrics                     | Education level was stratified.                                  | <b>Yes</b>                                                         | Higher education is associated with an increased rate of elective repeat Caesarean section ( $p < 0.047$ and $p < 0.03$ ). Whether this is due to patient differences or physician bias, physicians should be aware of this disparity and should attempt to provide unbiased informed consent for all women                                                                                                                                                                                                                                                                                                                                          |
| 28 | Hajjaj et al 2010<br>UK                          | <b>Research Paper</b><br>Semi-structured qualitative interviews were conducted with clinicians working in departments of dermatology                            | Assessment of nonclinical influences, beyond diagnosis and severity, on clinical decision-making in dermatology.                                                                                                  | <b>Doctors</b><br>Dermatology                    | Education level and financial status and treatment related costs | <b>Yes</b>                                                         | This paper does not offer a strong link between SES and decision-making. Sixty five percent of clinicians said that treatment-related costs that patients are likely to incur would sometimes influence their decision-making inability to afford transportation costs or cost of child minding at home. 19.6% clinicians raised education/intelligence as an issue especially relating to cases where systemic treatments with potential side-effects are required. Where there is a lack of awareness or understanding of the range of influences, there is a risk that some influences may *subconsciously* adversely impact on optimal decision. |
| 29 | Kristine Bærøe and Berit Bringeda 2011<br>Norway | <b>Editorial/Comment</b><br>A discussion about the conditions for acceptable and unacceptable priority settings with respect to patients' socioeconomic status. | The pattern is equal in all countries, the higher the socioeconomic status (SES) of patients, the better the health and the higher the life expectancy; health prospects are distributed along a social gradient. | <b>Doctors</b><br>Specialism not specified.      | Paper discussed SES                                              | <b>NA</b>                                                          | Health inequity in healthcare services by inaccurate interpretations of 'healthcare need' and biased care due to unconscious influence by patients' SES. Prioritisation of health need according to SES as a basis of equity is not ethical. Socioeconomic Factors and their impact on health should be forefront of HP thinking - raising awareness in order to prevent reinforcement of health inequity.                                                                                                                                                                                                                                           |
| 30 | Detsky 2010<br>USA                               | <b>Editorial/Comment</b><br>HP provide services and make decisions about diagnostics, treatments, procedures etc. There are variations.                         | The paper discusses...<br>... GPs and surgeons are biased against women, people from low SES groups, and other minority groups?                                                                                   | <b>Doctors</b><br>Specialism not specified.      | Paper discussed SES                                              | <b>NA</b>                                                          | Unintentional bias, which is far more common than intentional corruption, is particularly worrisome because humans are facile with rationalizing and often are not even aware of their bias. It is difficult to overcome bias that one does not even know is there.                                                                                                                                                                                                                                                                                                                                                                                  |

| Author(s)<br>date<br>Country     | Type of Publication<br>Research<br>design/method<br>(If applicable)                                                                                                               | Aim(s)<br>(If stated)                                                                                                                                                                                                                          | Population<br>Professional<br>Specialty          | Concept<br>SES Measure                                                                                                                                                                                                                        | Context<br>Link HP<br>Bias &<br>Decision-<br>making | Key results, findings, or information                                                                                                                                                                                                                                                                                                                                                                                                                                                                                                                                     |
|----------------------------------|-----------------------------------------------------------------------------------------------------------------------------------------------------------------------------------|------------------------------------------------------------------------------------------------------------------------------------------------------------------------------------------------------------------------------------------------|--------------------------------------------------|-----------------------------------------------------------------------------------------------------------------------------------------------------------------------------------------------------------------------------------------------|-----------------------------------------------------|---------------------------------------------------------------------------------------------------------------------------------------------------------------------------------------------------------------------------------------------------------------------------------------------------------------------------------------------------------------------------------------------------------------------------------------------------------------------------------------------------------------------------------------------------------------------------|
| 31 Paul Dieppe<br>2011<br>UK     | <b>Editorial/Comment</b><br>A discussion about the inequalities in the provision of surgical Interventions for people with Rheumatology conditions.                               | In the context of state provided healthcare - many studies have shown that older people, women, ethnic minorities, and those of lower SES are all likely to receive variations in interventions compared to well-off, middle aged white males. | <b>Doctors</b><br>Rheumatology                   | Paper discussed SES                                                                                                                                                                                                                           | <b>NA</b>                                           | The paper finds significant effects of SES on both hip and knee joint replacement rates for people with Osteoarthritis. It suggests that GPs and surgeons are biased against women, low SES patients, and other minority groups.                                                                                                                                                                                                                                                                                                                                          |
| 32 Dougal et al 2010<br>USA      | <b>Research Paper</b><br>Online national survey                                                                                                                                   | the influence of SES was examined on psychotherapists cognitive attributions and counter-transferences.                                                                                                                                        | <b>Psychological therapists</b><br>Mental Health | Paper discusses SES                                                                                                                                                                                                                           | <b>Yes</b>                                          | SES impacts on counter-transference reactions and clinical judgments according to SES. Rated interpersonal behaviour of the client with higher SES has evoking feelings of dominance more so than the lower SES. CAS measurement of 'causal attribution' found no statistically significant differences related to clinical judgment                                                                                                                                                                                                                                      |
| 33 Haider et al 2010<br>USA      | <b>Research Paper</b><br>Clinical vignettes. The survey included the Implicit Association Test (IAT) to assess unconscious preferences                                            | To estimate unconscious race and social class bias among first-year medical students and investigate its relationship with assessment.                                                                                                         | <b>Medical students</b>                          | Social class was depicted using occupation. Patient vocation is commonly used as a proxy for social class. Patient occupations were chosen using the NamPowers occupational prestige scale, which ranks occupations on a scale from 1 to 100. | <b>No</b>                                           | IAT testing showed A preference toward those in the upper class among 174 students (86%). a lower-class preference in 6 (3%). Multivariable analyses for all vignettes found no significant relationship between implicit biases and clinical assessment. Analysis stratified by patient race or class did not demonstrate any statistically significant association between student IAT scores and how students assessed patients for any of the vignettes. No interaction between IAT D scores and vignette patient class (or race) was found for any of the vignettes. |
| 34 McKinlay et al<br>2012<br>USA | <b>Research Paper</b><br>A factorial experiment using video vignettes was conducted.<br>1. Patient symptoms of diabetes<br>2. Known diabetes with emerging peripheral neuropathy. | To investigate additional causes of health care disparities in the decision-making of primary care doctors.                                                                                                                                    | <b>Doctors</b><br>Primary care                   | Appearance altered to reflect Class. Men presented with collar and tie (upper SES) or plaid shirt and jacket (lower SES). Women presented with either blazer with broach and makeup (high SES) or sweatshirt and no makeup (lower SES).       | <b>Yes</b>                                          | clinical management (specifically for foot neuropathy) is influenced by patient socioeconomic status (SES). Overall, upper SES patients would receive these essential examinations compared with lower SES patients. Upper SES patients were slightly more likely to be asked questions about their medical history (P < 0.05 for history of eye disease) and were more frequently referred to ophthalmologist (P = 0.024).                                                                                                                                               |

|    | <b>Author(s)<br/>date<br/>Country</b> | <b>Type of Publication<br/>Research<br/>design/method<br/>(If applicable)</b>                                                                                                                                                                                                                                                                                                                                        | <b>Aim(s)<br/>(If stated)</b>                                                                                                              | <b>Population<br/>Professional<br/>Specialty</b>                                        | <b>Concept<br/>SES Measure</b>                                                                                                        | <b>Context<br/>Link HP<br/>Bias &amp;<br/>Decision-<br/>making</b> | <b>Key results, findings, or information</b>                                                                                                                                                                                                                                                                                                                                  |
|----|---------------------------------------|----------------------------------------------------------------------------------------------------------------------------------------------------------------------------------------------------------------------------------------------------------------------------------------------------------------------------------------------------------------------------------------------------------------------|--------------------------------------------------------------------------------------------------------------------------------------------|-----------------------------------------------------------------------------------------|---------------------------------------------------------------------------------------------------------------------------------------|--------------------------------------------------------------------|-------------------------------------------------------------------------------------------------------------------------------------------------------------------------------------------------------------------------------------------------------------------------------------------------------------------------------------------------------------------------------|
| 35 | Shawahna et al<br>2012<br>Pakistan    | <b>Research Paper</b><br>Qualitative with two<br>observational phases.<br>Semi-structured<br>interviews - 2 hospitals,<br>2 diabetes care centres<br>and 2 private clinics.<br>Prescriptions were<br>analysed for<br>socioeconomic<br>indicators. In the second<br>phase, the opinions of a<br>panel of prescribers on<br>the influence<br>socioeconomic<br>indicators on<br>prescribing behaviour<br>were elicited. | To investigate<br>physician's<br>perspectives of<br>patients' SES and the<br>important indicators<br>influencing prescribing<br>behaviour. | <b>Doctors</b><br>Diabetes                                                              | participants described SES<br>based on 'job role' and a<br>judgment about whether the<br>person might be able to afford<br>treatment. | <b>Yes</b>                                                         | Literacy, educational background, compliance, dress, and appearance<br>were important indicators at the time of clinical decision-making for<br>physicians originating from urban areas. Participating physicians agreed<br>that patient's socioeconomic status influenced their drug prescribing<br>behaviour                                                                |
| 36 | Smith-oka 2012<br>Mexico              | <b>Research Paper</b><br>Interviews and<br>participant observation                                                                                                                                                                                                                                                                                                                                                   | To investigate Risk –<br>motherhood in a<br>Mexican public<br>hospital.                                                                    | <b>Multi-<br/>professional<br/>Doctors,<br/>Midwives,<br/>and Nurses.</b><br>Obstetrics | Income and area of residence                                                                                                          | <b>Yes</b>                                                         | Good mothers are married, knowledgeable, follows norms.<br>Bad mothers are unmarried, uneducated, deviant. These<br>views thought to reflect the paternalistic class structure of Mexican society.<br>Explicit bias of low SES single mothers evident in this research - linked again<br>to cooperation.<br>Pressure for sterilisation Vs the use of an IUD in low SES women. |

| Author(s)<br>date<br>Country      | Type of Publication<br>Research<br>design/method<br>(If applicable)                                                                                                                                                                                                                                                                                                                               | Aim(s)<br>(If stated)                                                                                                                                                                                 | Population<br>Professional<br>Specialty | Concept<br>SES Measure                                               | Context<br>Link HP<br>Bias &<br>Decision-<br>making | Key results, findings, or information                                                                                                                                                                                                                                                                                                                                                                                                                                                                                                                                                                                       |
|-----------------------------------|---------------------------------------------------------------------------------------------------------------------------------------------------------------------------------------------------------------------------------------------------------------------------------------------------------------------------------------------------------------------------------------------------|-------------------------------------------------------------------------------------------------------------------------------------------------------------------------------------------------------|-----------------------------------------|----------------------------------------------------------------------|-----------------------------------------------------|-----------------------------------------------------------------------------------------------------------------------------------------------------------------------------------------------------------------------------------------------------------------------------------------------------------------------------------------------------------------------------------------------------------------------------------------------------------------------------------------------------------------------------------------------------------------------------------------------------------------------------|
| 37<br>Lay-Yee et al<br>2013<br>NZ | <b>Research Paper</b><br>Sample of 9272 encounters at 185 family practices. Each practitioner was asked to provide data on themselves and on their practice, and to report on every fourth of their patients (a 25% sample) in each of two week-long periods separated by an interval of six months. The questionnaire recorded data about the patient, his or her problems and their management. | social disparities in health care pervasive features of health care systems. studying inter-practitioner variation in clinical activity across four payment types in New Zealand primary care system. | <b>Doctors</b><br>Primary Care          | deprivation level - NZ multi-index of deprivation used quintiles 1-5 | <b>Yes</b>                                          | There was greater variability of practitioner decision-making for socially disadvantaged patients found in fee-for service settings. Practitioners may have difficulty processing relevant clinical information for socially disadvantaged patients, and this greater degree of uncertainty may in turn be reflected in more variable decision-making. While there was little evidence in this primary care sample of systematic bias in clinical activity level by patient social group, practitioner variability was much more marked for patients drawn from ethnically and socio-economically disadvantaged background. |
| 38<br>Haider et al 2014<br>USA    | <b>Research Paper</b><br>Participants completed nine clinical vignettes, each with three trauma/acute care surgery management questions. social class IAT assessments were completed by each participant. Multivariable, ordered logistic regression to test IAT on decision-making.                                                                                                              | To assess Unconscious race and class bias and its association with decision-making by trauma and acute care surgeons                                                                                  | <b>Doctors</b><br>Trauma                | Social class stated in Vignette.                                     | <b>No</b>                                           | 90.7% demonstrated an implicit preference toward upper social class persons. Biases were not statistically significantly associated with clinical decision-making So despite high levels of implicit bias this did not alter the decisions made by the physician in a statistically significant way.                                                                                                                                                                                                                                                                                                                        |



| Author(s)<br>date<br>Country     | Type of Publication<br>Research<br>design/method<br>(If applicable)                                                                                                                                                                                                              | Aim(s)<br>(If stated)                                                                                                   | Population<br>Professional<br>Specialty  | Concept<br>SES Measure                                                                                                                                                    | Context<br>Link HP<br>Bias &<br>Decision-<br>making | Key results, findings, or information                                                                                                                                                                                                                                                                                                                                                                                                                                                                                                          |
|----------------------------------|----------------------------------------------------------------------------------------------------------------------------------------------------------------------------------------------------------------------------------------------------------------------------------|-------------------------------------------------------------------------------------------------------------------------|------------------------------------------|---------------------------------------------------------------------------------------------------------------------------------------------------------------------------|-----------------------------------------------------|------------------------------------------------------------------------------------------------------------------------------------------------------------------------------------------------------------------------------------------------------------------------------------------------------------------------------------------------------------------------------------------------------------------------------------------------------------------------------------------------------------------------------------------------|
| 39<br>Haider et al 2015<br>USA   | <b>Research Paper</b><br>Prospective Vignette study conducted among surgical RNs. Implicit association tests (IATs) for social class and race. Ordered logistic regression                                                                                                       | To assess unconscious Race and Class Biases among Registered Nurses.                                                    | <b>Nurses</b><br>Surgery                 | patients' race or social class were randomly altered. Social class vignettes used patients' occupations as proxies for their social status.                               | <b>No</b>                                           | 93.47% demonstrated an implicit preference toward upper social class persons. Participants were more likely to think that a lower SES with anxiety did not understand the procedure and needed to be re-consented. Intersectionality detected between race and SES and the use of post-surgical restraints and sedation. Implicit biases among RNs did not correlate with clinical decision-making. Presence of an unconscious bias was not associated with any overall differences in vignette-based clinical assessment and decision-making. |
| 40<br>Haider et al 2015<br>USA   | <b>Research Paper</b><br>Clinical vignettes, each with 3 management questions. Ordered logistic regression analysis on the Implicit Association Test (IAT) scores and used multivariable analysis to determine whether implicit bias was associated with the vignette responses. | To assess the relationship between unconscious bias and clinical decision-making                                        | <b>Doctors</b><br>Surgery                | The paper does not state how SES was communicated via the vignette style study.                                                                                           | <b>No</b>                                           | Although implicit biases of race and social class were present among most of the trauma and acute care clinician respondents, these biases were not associated with clinical decision-making. Clinicians were less likely to order an MRI of the cervical spine for patients with neck tenderness after a motor vehicle crash for low SES patients - this is hypothesised to be linked to health insurance status.                                                                                                                             |
| 41<br>John-Henderson 2015<br>USA | <b>Editorial/Comment</b><br>Implicit bias of SES discussed along with as implicit bias of race, gender, suicidal ideation, and obesity).                                                                                                                                         | Implicit cognition implications for global health                                                                       | <b>Doctors</b><br>Mental health          | paper discusses the use of the MacArthur SES scale - which is a self-rated 'place a cross on the ladder to indicate your position' scale                                  | <b>NA</b>                                           | Biases and discussed alongside resilience. The paper recommends an investigation into why some HPs make biased decisions and some do not. This could reduce the overall impact of implicit biases on health, both at the level of the individual and by positively affecting the relationship between patient and physician.                                                                                                                                                                                                                   |
| 42<br>Williams et al 2015<br>USA | <b>Research Paper</b><br>Vignette based study - surveyed seniors at 84 medical schools. two clinically equivalent management options for a set of cardiac patient vignettes. examined variations in student recommendations.                                                     | Investigation of variations in medical student recommendations based on patient race, gender, and socioeconomic status. | <b>Doctors</b><br>coronary heart disease | Patient SES was determined solely by the Hollingshead Occupational Scale and was fixed for each individual vignette but varied across the set of eight cardiac vignettes. | <b>Yes</b>                                          | Patient SES was a strong and significant predictor of student recommendations. With some intersectionality - when the patient was presented as being in the lowest SES group (SES 1-2), students were more likely to recommend procedures for black patients, and least likely to do so for white female patients. Judgmental attitudes from providers, even if not explicitly expressed, negatively affect physician-patient trust.                                                                                                           |

| Author(s)<br>date<br>Country                   | Type of Publication<br>Research<br>design/method<br>(If applicable)                                                                                                                                                                        | Aim(s)<br>(If stated)                                                                                                                                                                                              | Population<br>Professional<br>Specialty       | Concept<br>SES Measure                                                                                                                                                                    | Context<br>Link HP<br>Bias &<br>Decision-<br>making | Key results, findings, or information                                                                                                                                                                                                                                               |
|------------------------------------------------|--------------------------------------------------------------------------------------------------------------------------------------------------------------------------------------------------------------------------------------------|--------------------------------------------------------------------------------------------------------------------------------------------------------------------------------------------------------------------|-----------------------------------------------|-------------------------------------------------------------------------------------------------------------------------------------------------------------------------------------------|-----------------------------------------------------|-------------------------------------------------------------------------------------------------------------------------------------------------------------------------------------------------------------------------------------------------------------------------------------|
| 43<br>Castaneda-Guarderas et al<br>2016<br>USA | <b>Editorial/Comment</b><br>A discussion about shared decision-making with vulnerable Populations in the Emergency Department.                                                                                                             | This paper considers the future research agenda needed to examine shared decision-making with vulnerable populations of people who present to emergency departments in the U.S.                                    | <b>Doctors</b><br>Specialism not specified.   | Discussed in terms of Socioeconomic Disadvantage uneducated unemployed uninsured                                                                                                          | <b>NA</b>                                           | Shared decision-making in the ED setting among patients with socioeconomic challenges may be inhibited by a perceived power differential between physicians and their patients, beyond that experienced by more affluent patients.                                                  |
| 44<br>Elholm Madsen et al 2016<br>Denmark      | <b>Research Paper</b><br>An experimental factorial vignette survey was used. Four different vignettes describing fictitious patient cases with different SES variables were randomly allocated to therapists working in somatic hospitals. | To investigate whether occupational therapists and physiotherapists are influenced by the patient's SES                                                                                                            | <b>Occupational Therapist</b><br>Somatic care | Employment status and educational level were used as a proxy for SES.<br>a white collar-worker (lawyer employed and unemployed)<br>a blue collar-worker (janitor employed or unemployed); | <b>No</b>                                           | There were no statistically significant associations between the patient's SES and the judgements related to the patient's rehabilitation OR the rehabilitation effort given in phase one or towards providing equal treatment in a therapeutic situation.                          |
| 45<br>Popescu et al<br>2016<br>USA             | <b>Research Paper</b><br>Retrospective 1995 - 2007 data collected from the SEER programme. Key interests were race and SES.                                                                                                                | to understand whether between-physician and within physician variations play a role in cancer care disparities among seniors with breast and colorectal cancer enrolled in a national cancer surveillance program. | <b>Doctors</b><br>Cancer                      | Measured SES using patients' zip code median household income, categorized into deciles. SEER files contain several zip code and census tract-level SES variables.                        | <b>Yes</b>                                          | Patients residing in high-income zip codes were more likely to receive treatment than patients residing in low-income zip codes (e.g., 69%, 53%, and 65% top decile income patients received BCS, chemotherapy, and radiation vs. 46%, 48%, and 43% bottom decile income patients). |

| Author(s)<br>date<br>Country                    | Type of Publication<br>Research<br>design/method<br>(If applicable)                                                                                                                                                                                                                                                                                                                                                     | Aim(s)<br>(If stated)                                                                                                                                                                                                                                        | Population<br>Professional<br>Specialty          | Concept<br>SES Measure                    | Context<br>Link HP<br>Bias &<br>Decision-<br>making | Key results, findings, or information                                                                                                                                                                                                                                                                                                                                                                                                                                                                      |
|-------------------------------------------------|-------------------------------------------------------------------------------------------------------------------------------------------------------------------------------------------------------------------------------------------------------------------------------------------------------------------------------------------------------------------------------------------------------------------------|--------------------------------------------------------------------------------------------------------------------------------------------------------------------------------------------------------------------------------------------------------------|--------------------------------------------------|-------------------------------------------|-----------------------------------------------------|------------------------------------------------------------------------------------------------------------------------------------------------------------------------------------------------------------------------------------------------------------------------------------------------------------------------------------------------------------------------------------------------------------------------------------------------------------------------------------------------------------|
| 46<br>Fitzgerald et al<br>2017<br>International | <b>Systematic Review</b><br>PubMed, PsychINFO,<br>PsychARTICLE and<br>CINAHL were searched<br>for peer-reviewed<br>articles published<br>between 1st March 2003<br>and 31st March 2013.<br>Two reviewers assessed<br>the eligibility of the<br>identified papers based<br>on precise content and<br>quality criteria. The<br>references of eligible<br>papers were examined<br>to identify further<br>eligible studies. | To assess publications<br>examining implicit bias<br>in healthcare<br>professionals.                                                                                                                                                                         | <b>Multi-<br/>professional</b><br>NA             | SES                                       | <b>Yes</b>                                          | All studies found evidence for SES implicit biases among physicians and nurses.<br>Class may trump race in some circumstances so that being high SES is more salient than being non-white.<br>Based on the available evidence, physicians, and nurses manifest implicit biases to a similar degree as the general population. Biases also exist for age, mental illness, weight, having AIDS, brain injured patients perceived to have contributed to their injury, intravenous drug users and disability. |
| 47<br>Murphy et al<br>2017<br>USA               | <b>Editorial/Comment</b><br>A discussion about<br>socially at-risk<br>populations in relation<br>to health disparities.                                                                                                                                                                                                                                                                                                 | Increasingly, it is<br>recognized that<br>disparities are driven<br>not by differences in<br>biology or individual<br>patient characteristics,<br>but rather by social<br>determinants, or the<br>conditions of the<br>environments in which<br>people live. | <b>Doctor</b><br>Specialism<br>not<br>specified. | Paper discusses<br>socioeconomic position | <b>NA</b>                                           | Bias manifests itself in behaviours that impede relationship building. Physicians with higher levels of general bias are more likely to talk slowly, have greater verbal dominance, and have less patient-centred dialogue. Implicit bias influences diagnosis, treatment recommendations, questions asked of the patient, and diagnostic tests ordered.                                                                                                                                                   |

| Author(s)<br>date<br>Country         | Type of Publication<br>Research<br>design/method<br>(If applicable)                                                                                                                                                                                                                                                                                                       | Aim(s)<br>(If stated)                                                                                                                 | Population<br>Professional<br>Specialty | Concept<br>SES Measure                                                                                                                                                           | Context<br>Link HP<br>Bias &<br>Decision-<br>making | Key results, findings, or information                                                                                                                                                                                                                                                                                                                                                                                                  |
|--------------------------------------|---------------------------------------------------------------------------------------------------------------------------------------------------------------------------------------------------------------------------------------------------------------------------------------------------------------------------------------------------------------------------|---------------------------------------------------------------------------------------------------------------------------------------|-----------------------------------------|----------------------------------------------------------------------------------------------------------------------------------------------------------------------------------|-----------------------------------------------------|----------------------------------------------------------------------------------------------------------------------------------------------------------------------------------------------------------------------------------------------------------------------------------------------------------------------------------------------------------------------------------------------------------------------------------------|
| 48<br>Pettit et al 2017<br>USA       | <b>Research Paper</b><br>High-fidelity simulation - randomly assigned to participate in a simulation of acute coronary syndrome. Students were blinded to study objectives. quantitative data were obtained on the number of times students performed the following patient actions: acknowledged patient by name, asked about pain, conversed, and touching the patient. | To test the effect of socioeconomic status bias on Medical Student-Patient interactions using an Emergency Medicine Simulation.       | <b>Medical Students</b>                 | Mannequin - low SES depicted by a homeless person - dirt covered t-shirt and trousers. Mannequin - High SES depicted by executive dress - button down collar suit and tie etc.   | <b>Yes</b>                                          | Data demonstrate that Medical Students were more likely to ask the simulated patient with high SES about pain control (p = 0.04) and more likely to touch the low SES patient (p = 0.01). Paper discusses touch as a mechanism to communicate compassion - put could also be a display of power. Decision-making does not appear to be different - patient received aspirin and was sent for a cardiac catheterization in both groups. |
| 49<br>Goddu et al 2018<br>USA        | <b>Research Paper</b><br>Randomized vignette study of two chart notes employing stigmatizing versus neutral language to describe the same hypothetical patient, a 28-year-old man with sickle cell disease.                                                                                                                                                               | To assess if words matter... to assess if Stigmatizing Language aids in the transmission of Bias in the medical record                | <b>Medical Students</b>                 | Vignette language portraying the patient negatively with irrelevant or unnecessary indicators of lower socioeconomic status such as hanging out with friends outside McDonald's. | <b>Yes</b>                                          | Language may play a powerful role in influencing clinician attitudes and behaviour. Less aggressive pain management employed with the hypothetical patient who had low SES.                                                                                                                                                                                                                                                            |
| 50<br>Brandao et al 2019<br>Portugal | <b>Research Paper</b><br>Two experimental Vignette studies                                                                                                                                                                                                                                                                                                                | To investigate classism in pain care and the role of patient socioeconomic status on nurse's pain assessment and management practices | <b>Nurse Pain</b>                       | SES was manipulated by level of education and occupational activity                                                                                                              | <b>Yes</b>                                          | Overall, the higher-SES patient was perceived as having more intense pain than the lower-SES patients. The low-SES patient's pain was perceived as less credible than the high-SES patient's pain when distress cues were present. Patient SES influenced some of the nurses' pain assessments but not their management practices.                                                                                                     |

|    | <b>Author(s)<br/>date<br/>Country</b> | <b>Type of Publication<br/>Research<br/>design/method<br/>(If applicable)</b>                                                                                                                                                                    | <b>Aim(s)<br/>(If stated)</b>                                                                                                                                     | <b>Population<br/>Professional<br/>Specialty</b>                             | <b>Concept<br/>SES Measure</b>                                                                                     | <b>Context<br/>Link HP<br/>Bias &amp;<br/>Decision-<br/>making</b> | <b>Key results, findings, or information</b>                                                                                                                                                                                                              |
|----|---------------------------------------|--------------------------------------------------------------------------------------------------------------------------------------------------------------------------------------------------------------------------------------------------|-------------------------------------------------------------------------------------------------------------------------------------------------------------------|------------------------------------------------------------------------------|--------------------------------------------------------------------------------------------------------------------|--------------------------------------------------------------------|-----------------------------------------------------------------------------------------------------------------------------------------------------------------------------------------------------------------------------------------------------------|
| 51 | Gonzales et al<br>2019<br>USA         | <b>Research Paper</b><br>A telephone interviews incorporating Logistic regression models that assessed associations between race/ethnicity/education, medical discrimination, clinician mistrust, and treatment decision-making with concordance | To assess the associations between race/ethnicity/education, medical discrimination, clinician mistrust, and treatment decision-making and guideline concordance. | <b>Doctors</b><br>Cancer                                                     | Education level                                                                                                    | <b>Yes</b>                                                         | Intersectionality. Socioeconomic factors influenced guidelines concordance. They found educational disparities in breast cancer treatment. Non-college-educated Black women had lower odds of guideline-concordant care vs. college-educated White women. |
| 52 | Hirsh et al 2019<br>USA               | <b>Research Paper</b><br>Vignette style study. A randomized controlled trial.                                                                                                                                                                    | To test a virtual perspective-taking intervention to reduce race and SES disparities in pain care                                                                 | <b>Doctors</b><br>Pain                                                       | SES was represented visually by work attire: low SES patients - fast food uniform, and high SES – a business suit. | <b>Yes</b>                                                         | Statistically reliable treatment bias during the pain treatment decision-making pre-intervention. Forty seven percent of providers who were biased at baseline did not show a statistically reliable treatment bias one week later.                       |
| 53 | Vlietstra et al<br>2020<br>UK         | <b>Research Paper</b><br>Vignette – participants randomised to one of two video vignettes. Representing a psychological assessment session with either a ‘lower’ or ‘upper’ class client.                                                        | To assess for SES variations in clinical reasoning, namely diagnosis, risk assessment and treatment, and to measure class self-awareness.                         | <b>Psychological<br/>therapeutic<br/>professionals</b><br>Working in the NHS | Class<br>The accent and dress of the client were varied to elicit class stereotypes.                               | <b>No</b>                                                          | There was little difference in clinical reasoning between the two class conditions. The paper acknowledges that the dress variations did not portray class cues accurately or strongly enough to evoke a difference.                                      |
| 54 | Anastas et al<br>2020<br>USA          | <b>Research Paper</b><br>Vignette - 12 computer-simulated patients with chronic back pain that varied by race and SES (low/high). IAT also employed.                                                                                             | To assess provider attitudes on Chronic Pain Care Decisions.                                                                                                      | <b>Doctors</b><br>pain                                                       | SES was indicated by occupation and depicted by clothing.                                                          | <b>Yes</b>                                                         | Strong implicit preference for high SES over low SES individuals. There were significant race × SES interaction effects on provider ratings of pain interference, distress, and workplace accommodations.                                                 |

| Author(s)<br>date<br>Country                                        | Type of Publication<br>Research<br>design/method<br>(If applicable)                                                                                                                                                                                                                                                                                                                   | Aim(s)<br>(If stated)                                                                                                                                                                                                                                                       | Population<br>Professional<br>Specialty          | Concept<br>SES Measure                                                                                                                                                   | Context<br>Link HP<br>Bias &<br>Decision-<br>making | Key results, findings, or information                                                                                                                                                                                                                                                                                                                         |
|---------------------------------------------------------------------|---------------------------------------------------------------------------------------------------------------------------------------------------------------------------------------------------------------------------------------------------------------------------------------------------------------------------------------------------------------------------------------|-----------------------------------------------------------------------------------------------------------------------------------------------------------------------------------------------------------------------------------------------------------------------------|--------------------------------------------------|--------------------------------------------------------------------------------------------------------------------------------------------------------------------------|-----------------------------------------------------|---------------------------------------------------------------------------------------------------------------------------------------------------------------------------------------------------------------------------------------------------------------------------------------------------------------------------------------------------------------|
| 55<br>Bynum 2020<br>USA                                             | <b>Research Paper</b><br>Four doctors from two<br>Community Health<br>Centres convenient<br>sample because they<br>offer services to<br>uninsured people                                                                                                                                                                                                                              | To assess the doctor's<br>(Asthma Management)<br>perceptions of<br>uninsured patients.                                                                                                                                                                                      | <b>Doctors</b><br>primary care                   | Uninsured                                                                                                                                                                | <b>Yes</b>                                          | 3 out of the 4 Doctors indicated that low SES patients have issues with medication compliance.<br>All the participants indicated that access to affordable medication due to patients' SES was a barrier.<br>Paper states that it might be possible to improve physicians' decision-making through techniques that minimize biases.                           |
| 56<br>Crandlemire<br>2020<br>Canada                                 | <b>Editorial/Comment</b><br>A discussion about the<br>literature regarding<br>healthcare disparities<br>for people with low SES<br>and the role of<br>unconscious biases<br>held among healthcare<br>providers.                                                                                                                                                                       | Unconscious Bias in<br>Nursing is more likely<br>activated and more<br>prevalent during high<br>pressure or time<br>sensitive scenarios,<br>when people are busy<br>and tired, or<br>when decisions need to<br>be made and there is<br>missing or ambiguous<br>information. | <b>Nurses</b><br>Specialism<br>not<br>specified. | SES                                                                                                                                                                      | <b>NA</b>                                           | Decision-making is influenced by both positive and negative attitudes toward people due to unconscious or conscious biases held by healthcare providers which can affect patient care outcomes.                                                                                                                                                               |
| 57<br>Diniz et al 2020<br>International<br>(different<br>countries) | <b>Research Paper</b><br>A Mixed methods study.<br>Video vignette: Two<br>women, each doing two<br>different pain-inducing<br>movements.<br>After watching the<br>vignette nurses were<br>asked to:<br>1. Associate five<br>characteristics to the<br>women.<br>2. write a brief story to<br>describe 'the<br>woman's pain and<br>how it affects life<br>recommending a<br>treatment. | Examined how nurses'<br>perceptions of pain<br>patients' SES were<br>associated with (more<br>or less) dehumanizing<br>inferences about their<br>pain and different<br>treatment<br>recommendations.                                                                        | <b>Nurses</b><br>Pain                            | The video vignette women SES was determined using the MacArthur Scale of Subjective Social Status (based on appearance). Low and middle SES women chosen for the videos. | <b>Yes</b>                                          | Words associated with the middle SES women were - calm, friendly, informed, anxious, sociable.<br>Words associated with the lower SES women were - withdrawn, tough, passive, hardworking, worried, poorly informed.<br>Treatment decisions are similar except the low SES patient is referred to psychoeducation- because of a perceived lack of competence. |

|    | Author(s)<br>date<br>Country | Type of Publication<br>Research<br>design/method<br>(If applicable)                                                                                                                                   | Aim(s)<br>(If stated)                                                                                                                                                                                                                 | Population<br>Professional<br>Specialty          | Concept<br>SES Measure                                                                | Context<br>Link HP<br>Bias &<br>Decision-<br>making | Key results, findings, or information                                                                                                                                                                                                                                                                                          |
|----|------------------------------|-------------------------------------------------------------------------------------------------------------------------------------------------------------------------------------------------------|---------------------------------------------------------------------------------------------------------------------------------------------------------------------------------------------------------------------------------------|--------------------------------------------------|---------------------------------------------------------------------------------------|-----------------------------------------------------|--------------------------------------------------------------------------------------------------------------------------------------------------------------------------------------------------------------------------------------------------------------------------------------------------------------------------------|
| 58 | Veesart et al<br>2020<br>US  | <b>Editorial/Comment</b><br>A discussion about<br>unconscious bias and<br>how it might impact on<br>nursing care.                                                                                     | Everyone has a cultural<br>lens through which we<br>view the world, which<br>can sometimes create<br>biases. Often, the<br>decisions we make are<br>directly influenced by<br>those biases, even<br>when we espouse other<br>beliefs. | <b>Nurses</b><br>Specialism<br>not<br>specified. | SES                                                                                   | <b>NA</b>                                           | Making decisions based on prejudices can have devastating impacts on<br>nursing care. The first step in addressing this is self-awareness. Bias<br>decisions often occur under stressful situations                                                                                                                            |
| 59 | Beyer et al 2021<br>UK       | <b>Systematic review</b><br>Included works<br>published between<br>January 2004 and April<br>2020. PubMed, Embase<br>and Cochrane Central<br>databases                                                | To assess the current<br>evidence for factors<br>that influence<br>treatment decision-<br>making in localized<br>kidney Cancer                                                                                                        | <b>Multi-<br/>Professional</b><br>cancer         | socio economic status and<br>education status - as reported<br>in the primary papers. | <b>Yes</b>                                          | Education status, socioeconomic status, a family history of cancer, and<br>cancer anxiety can be barriers to treatment decisions in kidney cancer.<br>SES and economic variables were identified as barriers to treatment<br>decisions.                                                                                        |
| 60 | Chase 2021<br>USA            | <b>Editorial/Comment</b><br>A discussion regarding<br>health disparities<br>research and the<br>negative stereotypes<br>and attitudes that<br>providers can hold<br>toward certain patient<br>groups. | Biased interactions with<br>providers are a dynamic<br>two-way process that<br>can influence patients'<br>satisfaction and trust in<br>the health care<br>provider. Leading to<br>impairments in the<br>patient's health<br>outcomes. | <b>Muti-<br/>professional</b><br>Cancer          | SES                                                                                   | <b>NA</b>                                           | Advantageous and standard-of-care treatments may not be recommended<br>to certain patients because physicians believe that those patients may not<br>adhere to them.<br>When faced with limited time to adequately assess the patient's problem,<br>physicians may rely on their implicit stereotypes to make hasty decisions. |

| Author(s)<br>date<br>Country            | Type of Publication<br>Research<br>design/method<br>(If applicable)                                                                                                                                                                                                                                | Aim(s)<br>(If stated)                                                                                                                                                               | Population<br>Professional<br>Specialty       | Concept<br>SES Measure                                                 | Context<br>Link HP<br>Bias &<br>Decision-<br>making | Key results, findings, or information                                                                                                                                                                                                                                                                                                                                                                                                         |
|-----------------------------------------|----------------------------------------------------------------------------------------------------------------------------------------------------------------------------------------------------------------------------------------------------------------------------------------------------|-------------------------------------------------------------------------------------------------------------------------------------------------------------------------------------|-----------------------------------------------|------------------------------------------------------------------------|-----------------------------------------------------|-----------------------------------------------------------------------------------------------------------------------------------------------------------------------------------------------------------------------------------------------------------------------------------------------------------------------------------------------------------------------------------------------------------------------------------------------|
| 61<br>Khidir et al 2021<br>USA          | <b>Research Paper</b><br>Cross-sectional analysis of a sample taken from 100% of Medicare claims for emergency department (ED) visits. ED visits from January 1, 2016, through December 31, 2019. Decision about admission or discharge were analysed according to race, Medicaid, and low income. | To estimate the consistency of ED physician admission propensities across categories of patient sex, race and ethnicity, and Medicaid enrolment.                                    | <b>Doctors</b><br>Emergency care              | insurance status - low income.                                         | <b>No</b>                                           | Doctors who are more or less likely to admit patients from the ED are more or less likely to do so regardless of SES.<br>No evidence of SES bias and decision-making about admission established.                                                                                                                                                                                                                                             |
| 62<br>Manzer et al<br>2021<br>USA       | <b>Research Paper</b><br>Qualitative Interviews                                                                                                                                                                                                                                                    | To assess bias through the case of contraception.                                                                                                                                   | <b>Multi-professional</b><br>Family Planning. | SES and Class                                                          | <b>Yes</b>                                          | Participants link pregnancy risk to women of low SES. Differences in contraception advice found. HPs more likely to steer patients of low SES toward long-acting contraception - can last 1 year or more, rather than prioritizing patients' preferences. HP Bias decision-making may be exacerbated by the fast-paced, high-stress environments and lack of time.                                                                            |
| 63<br>Agerstrom et al<br>2021<br>Sweden | <b>Research Paper</b><br>A retrospective multiple regression analysis study. Data extracted from Swedish LISA database                                                                                                                                                                             | To examine SES disparities in In Hospital Cardiac Arrest (IHCA) treatment and survival. Assessing SES at the patient level and controlling other variables to assess impact of SES. | <b>Multi-professional</b><br>Cardiac Care     | SES proxy used highest level of completed education and annual income. | <b>Yes</b>                                          | Patients with lower SES, low income and low education were all significantly associated with more delay, and lower levels of immediate and long-term survival.<br>People with high SES are more likely to have their heart rhythm monitored prior to the IHCA, despite having better health (less comorbidity).<br>Heart Rhythm monitoring was significantly associated with less delay and increased immediate survival and 30-day survival. |



|    | Author(s)<br>date<br>Country        | Type of Publication<br>Research<br>design/method<br>(If applicable)                                                                                                                                                                                                                   | Aim(s)<br>(If stated)                                                                                                                                                                                           | Population<br>Professional<br>Specialty | Concept<br>SES Measure                                                                                                         | Context<br>Link HP<br>Bias &<br>Decision-<br>making | Key results, findings, or information                                                                                                                                                                                                                                                                                                                                                                                                                                             |
|----|-------------------------------------|---------------------------------------------------------------------------------------------------------------------------------------------------------------------------------------------------------------------------------------------------------------------------------------|-----------------------------------------------------------------------------------------------------------------------------------------------------------------------------------------------------------------|-----------------------------------------|--------------------------------------------------------------------------------------------------------------------------------|-----------------------------------------------------|-----------------------------------------------------------------------------------------------------------------------------------------------------------------------------------------------------------------------------------------------------------------------------------------------------------------------------------------------------------------------------------------------------------------------------------------------------------------------------------|
| 64 | Bernardes et al<br>2021<br>Portugal | <b>Research Paper</b><br>Vignette: Drawing on a social psychological model of dehumanization. Two online experimental studies were conducted. vignettes/images depicting 2 cases of women with chronic low-back pain, followed by videos of them performing a pain-inducing movement. | To test the effect of patient socioeconomic status on pain assessment and management. Also, whether patient dehumanization and perceived life hardship mediated these effects.                                  | <b>Multi-professional</b><br>Pain       | SES was manipulated: level of education (incomplete high school education Vs degree) and occupation (factory worker Vs Judge). | <b>Yes</b>                                          | Medical students: pain assessment was less comprehensive for low SES. They rated the low SES patient as having slightly lower pain intensity during movement but perceived her as more credible and with higher pain-related disability.<br>Nurses: pain assessment was less comprehensive for higher SES. Nurses reported being slightly more willing to offer individualized care to the low SES patient. Lower SES patients were perceived as being more disabled by the pain. |
| 65 | Kirkham et al<br>2022<br>UK         | <b>Editorial/Comment</b><br>A discussion about the Department of Health funded evaluation of the MIDIRS about Informed Choice leaflet. Stereotyping can be a defence mechanism which assisted midwives in coping with the pressures of work.                                          | Midwives sometimes misjudged women's ability and willingness to participate in their maternity care and, therefore, women can be negatively labelled about things like housing tenure or social class [or age]. | <b>Midwives</b><br>Maternity            | Social class discussed                                                                                                         | <b>NA</b>                                           | SES stereotyping judgements affect Midwives behaviour. Low SES Women's silence reinforced the staff's perception that 'they don't want information.' It may also enable busy clinics to move at an 'efficient' and 'reasonable' pace.                                                                                                                                                                                                                                             |
| 66 | Bruno et al 2022<br>Canada          | <b>Research Paper</b><br>Prospective cross-sectional study from five primary care practices. A randomized controlled trial of a diabetes goal setting and shared decision-making plan.                                                                                                | To assess if SES is associated with empathic communication and decision quality in Diabetes Care.                                                                                                               | <b>Multi-professional</b><br>Diabetes   | Patient self-reported their ethnicity, education level and income prior to the trial.                                          | <b>No</b>                                           | Shared decision-making was not impacted by low education or income.                                                                                                                                                                                                                                                                                                                                                                                                               |

1  
2  
3  
4  
5  
6  
7  
8  
9  
10  
11  
12  
13  
14  
15  
16  
17  
18  
19  
20  
21  
22  
23  
24  
25  
26  
27  
28  
29  
30  
31  
32  
33  
34  
35  
36  
37  
38  
39  
40  
41  
42  
43  
44  
45  
46

| Author(s)<br>date<br>Country   | Type of Publication<br>Research<br>design/method<br>(If applicable) | Aim(s)<br>(If stated)                                                                                                                                                                                                                                                        | Population<br>Professional<br>Specialty | Concept<br>SES Measure | Context<br>Link HP<br>Bias &<br>Decision-<br>making | Key results, findings, or information                                                                                           |
|--------------------------------|---------------------------------------------------------------------|------------------------------------------------------------------------------------------------------------------------------------------------------------------------------------------------------------------------------------------------------------------------------|-----------------------------------------|------------------------|-----------------------------------------------------|---------------------------------------------------------------------------------------------------------------------------------|
| 67<br>Torres et al 2022<br>USA | Review<br>Literature review                                         | To assess implicit biases among healthcare providers, the influence of implicit biases on providers' medical judgments and communication, and the mechanisms by which this impaired patient-physician communication affects patients' health outcomes and disease prognoses. | Doctors<br>Gynaecology<br>Oncology      | Paper discusses SES    | NA                                                  | SES and insurance status impacts on unequal care and quality of care. SES associated with non-adherence to clinical guidelines. |

# PRISMA 2020 Checklist

Health Professionals implicit bias of patients with low socioeconomic status (SES) and its effects on clinical decision-making: A Systematic Scoping Review

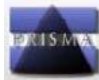

## PRISMA 2020 Checklist

| Section and Topic             | Item # | Checklist item                                                                                                                                                                                                                                                                                       | Location where item is reported |
|-------------------------------|--------|------------------------------------------------------------------------------------------------------------------------------------------------------------------------------------------------------------------------------------------------------------------------------------------------------|---------------------------------|
| <b>TITLE</b>                  |        |                                                                                                                                                                                                                                                                                                      |                                 |
| Title                         | 1      | Identify the report as a systematic review.                                                                                                                                                                                                                                                          | 1                               |
| <b>ABSTRACT</b>               |        |                                                                                                                                                                                                                                                                                                      |                                 |
| Abstract                      | 2      | See the PRISMA 2020 for Abstracts checklist.                                                                                                                                                                                                                                                         | 2                               |
| <b>INTRODUCTION</b>           |        |                                                                                                                                                                                                                                                                                                      |                                 |
| Rationale                     | 3      | Describe the rationale for the review in the context of existing knowledge.                                                                                                                                                                                                                          | 4                               |
| Objectives                    | 4      | Provide an explicit statement of the objective(s) or question(s) the review addresses.                                                                                                                                                                                                               | 5                               |
| <b>METHODS</b>                |        |                                                                                                                                                                                                                                                                                                      |                                 |
| Eligibility criteria          | 5      | Specify the inclusion and exclusion criteria for the review and how studies were grouped for the syntheses.                                                                                                                                                                                          | 5-6                             |
| Information sources           | 6      | Specify all databases, registers, websites, organisations, reference lists and other sources searched or consulted to identify studies. Specify the date when each source was last searched or consulted.                                                                                            | 5                               |
| Search strategy               | 7      | Present the full search strategies for all databases, registers and websites, including any filters and limits used.                                                                                                                                                                                 | Supplementary Material          |
| Selection process             | 8      | Specify the methods used to decide whether a study met the inclusion criteria of the review, including how many reviewers screened each record and each report retrieved, whether they worked independently, and if applicable, details of automation tools used in the process.                     | 6                               |
| Data collection process       | 9      | Specify the methods used to collect data from reports, including how many reviewers collected data from each report, whether they worked independently, any processes for obtaining or confirming data from study investigators, and if applicable, details of automation tools used in the process. | 6                               |
| Data items                    | 10a    | List and define all outcomes for which data were sought. Specify whether all results that were compatible with each outcome domain in each study were sought (e.g. for all measures, time points, analyses), and if not, the methods used to decide which results to collect.                        | NA                              |
|                               | 10b    | List and define all other variables for which data were sought (e.g. participant and intervention characteristics, funding sources). Describe any assumptions made about any missing or unclear information.                                                                                         | 6                               |
| Study risk of bias assessment | 11     | Specify the methods used to assess risk of bias in the included studies, including details of the tool(s) used, how many reviewers assessed each study and whether they worked independently, and if applicable, details of automation tools used in the process.                                    | NA                              |
| Effect measures               | 12     | Specify for each outcome the effect measure(s) (e.g. risk ratio, mean difference) used in the synthesis or presentation of results.                                                                                                                                                                  | NA                              |
| Synthesis methods             | 13a    | Describe the processes used to decide which studies were eligible for each synthesis (e.g. tabulating the study intervention characteristics and comparing against the planned groups for each synthesis (item #5)).                                                                                 | NA                              |
|                               | 13b    | Describe any methods required to prepare the data for presentation or synthesis, such as handling of missing summary statistics, or data conversions.                                                                                                                                                | NA                              |
|                               | 13c    | Describe any methods used to tabulate or visually display results of individual studies and syntheses.                                                                                                                                                                                               | 6                               |
|                               | 13d    | Describe any methods used to synthesize results and provide a rationale for the choice(s). If meta-analysis was performed, describe the model(s), method(s) to identify the presence and extent of statistical heterogeneity, and software package(s) used.                                          | 5-6                             |
|                               | 13e    | Describe any methods used to explore possible causes of heterogeneity among study results (e.g. subgroup analysis, meta-regression).                                                                                                                                                                 | NA                              |
|                               | 13f    | Describe any sensitivity analyses conducted to assess robustness of the synthesized results.                                                                                                                                                                                                         | NA                              |
| Reporting bias assessment     | 14     | Describe any methods used to assess risk of bias due to missing results in a synthesis (arising from reporting biases).                                                                                                                                                                              | NA                              |

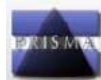

## PRISMA 2020 Checklist

| Section and Topic                              | Item # | Checklist item                                                                                                                                                                                                                                                                       | Location where item is reported |
|------------------------------------------------|--------|--------------------------------------------------------------------------------------------------------------------------------------------------------------------------------------------------------------------------------------------------------------------------------------|---------------------------------|
| Certainty assessment                           | 15     | Describe any methods used to assess certainty (or confidence) in the body of evidence for an outcome.                                                                                                                                                                                | NA                              |
| <b>RESULTS</b>                                 |        |                                                                                                                                                                                                                                                                                      |                                 |
| Study selection                                | 16a    | Describe the results of the search and selection process, from the number of records identified in the search to the number of studies included in the review, ideally using a flow diagram.                                                                                         | 7                               |
|                                                | 16b    | Cite studies that might appear to meet the inclusion criteria, but which were excluded, and explain why they were excluded.                                                                                                                                                          | 7                               |
| Study characteristics                          | 17     | Cite each included study and present its characteristics.                                                                                                                                                                                                                            | Supplementary Material          |
| Risk of bias in studies                        | 18     | Present assessments of risk of bias for each included study.                                                                                                                                                                                                                         | NA                              |
| Results of individual studies                  | 19     | For all outcomes, present, for each study: (a) summary statistics for each group (where appropriate) and (b) an effect estimate and its precision (e.g. confidence/credible interval), ideally using structured tables or plots.                                                     | Supplementary Material          |
| Results of syntheses                           | 20a    | For each synthesis, briefly summarise the characteristics and risk of bias among contributing studies.                                                                                                                                                                               | NA                              |
|                                                | 20b    | Present results of all statistical syntheses conducted. If meta-analysis was done, present for each the summary estimate and its precision (e.g. confidence/credible interval) and measures of statistical heterogeneity. If comparing groups, describe the direction of the effect. | NA                              |
|                                                | 20c    | Present results of all investigations of possible causes of heterogeneity among study results.                                                                                                                                                                                       | NA                              |
|                                                | 20d    | Present results of all sensitivity analyses conducted to assess the robustness of the synthesized results.                                                                                                                                                                           | NA                              |
| Reporting biases                               | 21     | Present assessments of risk of bias due to missing results (arising from reporting biases) for each synthesis assessed.                                                                                                                                                              | NA                              |
| Certainty of evidence                          | 22     | Present assessments of certainty (or confidence) in the body of evidence for each outcome assessed.                                                                                                                                                                                  | NA                              |
| <b>DISCUSSION</b>                              |        |                                                                                                                                                                                                                                                                                      |                                 |
| Discussion                                     | 23a    | Provide a general interpretation of the results in the context of other evidence.                                                                                                                                                                                                    | 8-16                            |
|                                                | 23b    | Discuss any limitations of the evidence included in the review.                                                                                                                                                                                                                      | 16                              |
|                                                | 23c    | Discuss any limitations of the review processes used.                                                                                                                                                                                                                                | 16                              |
|                                                | 23d    | Discuss implications of the results for practice, policy, and future research.                                                                                                                                                                                                       | 16-17                           |
| <b>OTHER INFORMATION</b>                       |        |                                                                                                                                                                                                                                                                                      |                                 |
| Registration and protocol                      | 24a    | Provide registration information for the review, including register name and registration number, or state that the review was not registered.                                                                                                                                       | NA                              |
|                                                | 24b    | Indicate where the review protocol can be accessed, or state that a protocol was not prepared.                                                                                                                                                                                       | 3 and 5                         |
|                                                | 24c    | Describe and explain any amendments to information provided at registration or in the protocol.                                                                                                                                                                                      | NA                              |
| Support                                        | 25     | Describe sources of financial or non-financial support for the review, and the role of the funders or sponsors in the review.                                                                                                                                                        | 19                              |
| Competing interests                            | 26     | Declare any competing interests of review authors.                                                                                                                                                                                                                                   | 19                              |
| Availability of data, code and other materials | 27     | Report which of the following are publicly available and where they can be found: template data collection forms; data extracted from included studies; data used for all analyses; analytic code; any other materials used in the review.                                           | Supplementary materials         |

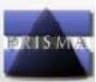

# PRISMA 2020 Checklist

- 1
- 2
- 3
- 4
- 5
- 6
- 7
- 8
- 9
- 10
- 11
- 12
- 13
- 14
- 15
- 16
- 17
- 18
- 19
- 20
- 21
- 22
- 23
- 24
- 25
- 26
- 27
- 28
- 29
- 30
- 31
- 32
- 33
- 34
- 35
- 36
- 37
- 38
- 39
- 40
- 41
- 42
- 43
- 44
- 45
- 46
- 47

From: Page MJ, McKenzie JE, Bossuyt PM, Boutron I, Hoffmann TC, Mulrow CD, et al. The PRISMA 2020 statement: an updated guideline for reporting systematic reviews. *BMJ* 2021;372:n71. doi: 10.1136/bmj.n71

For more information, visit: <http://www.prisma-statement.org/>

For peer review only
