# Supplementary material for: Health professionals implicit bias of patients with low socioeconomic status (SES) and its effects on clinical decision-making: a scoping review
Source: PubMed Central journal article supplement — BMJ Open. 2024 Jul 2;14(7):e081723. doi: 10.1136/bmjopen-2023-081723 (PMC11227794; doi:10.1136/bmjopen-2023-081723), 2024-07-02
Supplement: bmjopen-2023-081723supp001.pdf [file bmjopen-2023-081723supp001.pdf]

## **Supplementary Material – Search Strategies**

### **Medline ALL (OVIDSP): 1946 to present**

1. Socioeconomic Factors/
2. employment/
3. unemployment/
4. Economic Status/
5. Educational Status/
6. Medical Indigency/
7. exp Social Class/
8. exp Health Status Disparities/
9. exp Healthcare Disparities/
10. exp Poverty/
11. exp poverty areas/
12. ((social or socio economic or socioeconomic or economic or income) adj4 (deprivat\* or advantage\* or disadvantage\* or disparit\* or status or class or position or hierach\* or determinant\* or inequalit\* or inequit\* or barrier\* or circumstance\*)).tw.
13. ((education\* or employment) adj2 (status or level)).tw.
14. (sociodemographic or socio demographic or income or wealth or poverty or affluen\*).tw.
15. SES.tw.
16. 1 or 2 or 3 or 4 or 5 or 6 or 7 or 8 or 9 or 10 or 12 or 13 or 14 or 15
17. exp Clinical Decision-Making/
18. exp Decision Making/
19. Patient Care Management/
20. exp disease management/
21. ((Clinical or medical or health or treatment\*) adj2 (decision\* or decid\* or option\* or choice\*)).tw.
22. (treatment\* adj2 (select\* or recommend\* or receipt)).tw.
23. 17 or 18 or 19 or 20 or 21 or 22

24. exp Prejudice/
25. exp "Attitude of Health Personnel"/
26. exp Professional-Patient Relations/
27. exp Unconscious, Psychology/
28. "unconscious bias\*".tw.
29. ((Implicit or explicit) adj3 (cognition or bias\*)).tw.
30. prejudice.tw.
31. stereotyp\*.tw.
32. Classism.tw.
33. (treatment\* adj2 (unequal or differential)).tw.
34. (("Health professional\*" or nurse\* or doctor\* or clinician\* or physician\* or registrar\* or intern\* or SHO\* or surgeon\* or student\* or AHP\* or allied or physio\* or speech or occupational or Dietitian\* or therapist\* or radiographer\* or midwi\* or "General Practitioner\*" or GP\*) adj3 (attitude or judg\* or bias)).tw.
35. exp Health Personnel/
36. exp Students, health occupations/
37. 35 or 36
38. exp Psychology, social/
39. exp Mental Processes/
40. 38 or 39
41. 37 and 40
42. 24 or 25 or 26 or 27 or 28 or 29 or 30 or 31 or 32 or 33 or 34 or 41
43. 16 and 23 and 42

**EMBASE (OVIDSP): 1947 to present**

1. socioeconomic/
2. economic status/
3. income group/

4. poverty/
5. exp employment status/
6. exp educational status/
7. exp social status/
8. exp health care disparity/
9. exp health disparity/
10. ((social or socio economic or socioeconomic or economic or income) adj4 (deprivat\* or advantage\* or disadvantage\* or disparit\* or status or class or position or hierach\* or determinant\* or inequalit\* or inequit\* or barrier\* or circumstance\*).tw.
11. ((education\* or employment) adj2 (status or level)).tw.
12. (sociodemographic or socio demographic or income or wealth or poverty or affluen\*).tw.
13. SES.tw.
14. 1 or 2 or 3 or 4 or 5 or 6 or 7 or 8 or 9 or 10 or 11 or 12 or 13
15. exp clinical decision making/
16. exp medical decision making/
17. exp decision making/
18. patient care/
19. disease management/
20. ((Clinical or medical or health or treatment\*) adj2 (decision\* or decid\* or option\* or choice\*).tw.
21. (treatment\* adj2 (select\* or recommend\* or receipt)).tw.
22. 15 or 16 or 17 or 18 or 19 or 20 or 21
23. exp prejudice/
24. exp cognitive bias/
25. exp health personnel attitude/
26. exp professional-patient relationship/
27. exp ego development/
28. exp stereotypy/
29. prejudice.tw.

30. stereotyp\*.tw.
31. Classism.tw.
32. (treatment\* adj2 (unequal or differential)).tw.
33. (("Health professional\*" or nurse\* or doctor\* or clinician\* or physician\* or registrar\* or intern\* or SHO\* or surgeon\* or student\* or AHP\* or allied or physio\* or speech or occupational or Dietitian\* or therapist\* or radiographer\* or midwi\* or "general practitioner\*" or GP\*) adj2 (attitude or judg\* or bias)).tw.
34. exp health care personnel/
35. exp health student/
36. 34 or 35
37. exp social psychology/
38. cognition/
39. mental function/
40. 37 or 38 or 39
41. 36 and 40
42. 23 or 24 or 25 or 26 or 27 or 28 or 29 or 30 or 31 or 32 or 33 or 41
43. 14 and 22 and 42
44. limit 43 to english language

### **ASSIA (Proquest): 1987 to present**

((MAINSUBJECT.EXACT.EXPLODE("Socioeconomic factors") OR  
MAINSUBJECT.EXACT.EXPLODE("Socioeconomic indicators") OR  
MAINSUBJECT.EXACT.EXPLODE("Socioeconomic conditions") OR  
MAINSUBJECT.EXACT("Employment") OR  
MAINSUBJECT.EXACT("Unemployment") OR MAINSUBJECT.EXACT("Poverty")  
OR MAINSUBJECT.EXACT.EXPLODE("Low income people") OR ab((social  
NEAR/4 (deprivat\* OR advantage\* OR disadvantage\* OR disparit\* OR status OR  
class OR position OR hierach\* OR determinant\* OR inequalit\* OR inequit\* OR  
barrier\* OR circumstance\*))) OR ab((socio economic NEAR/4 (deprivat\* OR  
advantage\* OR disadvantage\* OR disparit\* OR status OR class OR position OR  
hierach\* OR determinant\* OR inequalit\* OR inequit\* OR barrier\* OR  
circumstance\*))) OR ab((socioeconomic NEAR/4 (deprivat\* OR advantage\* OR  
disadvantage\* OR disparit\* OR status OR class OR position OR hierach\* OR

determinant\* OR inequalit\* OR inequit\* OR barrier\* OR circumstance\*)) OR  
 ab((sociodemographic OR socio demographic OR income OR wealth OR poverty  
 OR affluen\*)) AND (MAINSUBJECT.EXACT.EXPLODE("Decision making") OR  
 ab(((Clinical OR medical OR health OR treatment\*) NEAR/2 (decision\* OR decid\*  
 OR option\* OR choice\*)) OR ab((treatment\* NEAR/2 (select\* OR recommend\* OR  
 receipt)))) AND (MAINSUBJECT.EXACT("Bias") OR  
 MAINSUBJECT.EXACT.EXPLODE("Cognitive bias") OR  
 MAINSUBJECT.EXACT.EXPLODE("Prejudice") OR  
 MAINSUBJECT.EXACT.EXPLODE("Health professional-Patient relationships") OR  
 ab(((Implicit OR explicit) NEAR/3 (cognition OR bias\*)) OR ab("unconscious bias\*")  
 OR ab(Classism) OR ab((treatment\* NEAR/2 (unequal OR differential))) OR  
 ab(Stereotyp\*) OR ab((((("Health professional\*" OR nurse\* OR doctor\* OR clinician\*  
 OR physician\* OR registrar\* OR intern\* OR SHO\* OR surgeon\* OR student\* OR  
 AHP\* OR allied OR physio\* OR speech OR occupational OR Dietitian\* OR therapist\*  
 OR radiographer\* OR midwi\* OR "general practitioner\*" OR GP\*) NEAR/2 (attitude  
 OR judg\* OR bias\*)))) OR ab(prejudice\*))

### Scopus (Elsevier): 1960 to present

(( TITLE-ABS-KEY ( social W/4 ( deprivat\* OR advantage\* OR disadvantage\*  
 OR disparit\* OR status OR class OR position OR hierach\* OR determinant\*  
 OR inequalit\* OR inequit\* OR barrier\* OR circumstance\* )) OR ( TITLE-ABS-  
 KEY ( "socio economic" W/4 ( deprivat\* OR advantage\* OR disadvantage\* OR  
 disparit\* OR status OR class OR position OR hierach\* OR determinant\* OR  
 inequalit\* OR inequit\* OR barrier\* OR circumstance\* )) OR ( TITLE-ABS-KEY  
 ( socioeconomic W/4 ( deprivat\* OR advantage\* OR disadvantage\* OR disparit\*  
 OR status OR class OR position OR hierach\* OR determinant\* OR inequalit\*  
 OR inequit\* OR barrier\* OR circumstance\* )) OR (( TITLE-ABS-KEY (   
 sociodemographic )) AND ( TITLE-ABS-KEY ( income OR wealth OR poverty  
 OR affluen\* )) OR ( TITLE-ABS-KEY ( employment OR unemployment )) )  
 AND (( TITLE-ABS-KEY ( clinical W/2 ( decision\* OR decid\* OR option\* OR  
 choice\* )) OR ( TITLE-ABS-KEY ( medical W/2 ( decision\* OR decid\* OR  
 option\* OR choice\* )) OR ( TITLE-ABS-KEY ( health W/2 ( decision\* OR  
 decid\* OR option\* OR choice\* )) OR ( TITLE-ABS-KEY ( treatment W/2 (   
 decision\* OR decid\* OR option\* OR choice\* )) OR ( TITLE-ABS-KEY ((   
 treatment OR clinical ) W/2 recommend\* )) AND (( TITLE-ABS-KEY ( "health  
 professional" -patient W/1 relations )) OR ( TITLE-ABS-KEY ( doctor-patient W/1  
 relations )) OR ( TITLE-ABS-KEY ( clinician-patient W/1 relations )) OR ( TITLE-  
 ABS-KEY ( nurse-patient W/1 relations )) OR ( TITLE-ABS-KEY ( "unconscious  
 bias\*" )) OR ( TITLE-ABS-KEY ( ( implicit OR explicit ) W/3 bias\* )) OR (   
 TITLE-ABS-KEY ( ( implicit OR explicit ) W/3 cognition )) OR ( TITLE-ABS-KEY (   
 classism )) OR ( TITLE-ABS-KEY ( prejudice\* )) OR ( TITLE-ABS-KEY ( ( "Health  
 professional" \* OR nurse\* OR doctor\* OR clinician\* OR physician\* OR

registrar\* OR intern\* OR sho\* OR surgeon\* OR student\* OR ahp\* OR allied OR physio\* OR speech OR occupational OR dietitian\* OR therapist\* OR radiographer\* OR midwi\* ) W/2 attitude\* ) ) OR ( TITLE-ABS-KEY ( ( "Health professional" \* OR nurse\* OR doctor\* OR clinician\* OR physician\* OR registrar\* OR intern\* OR sho\* OR surgeon\* OR student\* OR ahp\* OR allied OR physio\* OR speech OR occupational OR dietitian\* OR therapist\* OR radiographer\* OR midwi\* ) W/2 bias\* ) ) OR ( TITLE-ABS-KEY ( treatment\* W/2 ( unequal OR differential ) ) ) OR ( TITLE-ABS-KEY ( ( "Health professional"\* \* OR nurse\* OR doctor\* OR clinician\* OR physician\* OR registrar\* OR intern\* OR sho\* OR surgeon\* OR student\* OR ahp\* OR allied OR physio\* OR speech OR occupational OR dietitian\* OR therapist\* OR radiographer\* OR midwi\* OR "general practitioner\*" OR GP\* ) W/2 judg\* ) ) )

### **CINAHL (EBSCO): 1976 to present**

S52 S16 AND S24 AND S50 Narrow by Language: - english

S51 S16 AND S24 AND S50

S50 S25 OR S26 OR S27 OR S28 OR S29 OR S30 OR S31 OR S32 OR S33 OR S34 OR S35 OR S36 OR S37 OR S38 OR S39 OR S40 OR S41 OR S42 OR S49

S49 S45 AND S48

S48 S46 OR S47

S47 (MH "Mental Processes+")

S46 (MH "Psychology, Social+")

S45 S43 OR S44

S44 (MH "Students, Health Occupations+")

S43 (MH "Health Personnel+")

S42 AB (("Health professional\*" or nurse\* or doctor\* or clinician\* or physician\* or registrar\* or intern\* or SHO\* or surgeon\* or student\* or AHP\* or allied or physio\* or speech or occupational or Dietitian\* or therapist\* or radiographer\* or midwi\*) N2 (attitude or judg\* or bias\*))

S41 TI (("Health professional\*" or nurse\* or doctor\* or clinician\* or physician\* or registrar\* or intern\* or SHO\* or surgeon\* or student\* or AHP\* or allied or physio\* or speech or occupational or Dietitian\* or therapist\* or radiographer\* or midwi\* or "general practitioner\*" or GP\*) N2 (attitude or judg\* or bias\*))

S40 AB (treatment\* N2 (unequal or differential))

S39 TI (treatment\* N2 (unequal or differential))

- S38 AB Classism
- S37 TI Classism
- S36 AB stereotyp\*
- S35 TI stereotyp\*
- S34 AB prejudice
- S33 TI prejudice
- S32 AB ((Implicit or explicit) N3 (cognition or bias\*))
- S31 TI ((Implicit or explicit) N3 (cognition or bias\*))
- S30 AB "unconscious bias\*\*"
- S29 TI "unconscious bias\*\*"
- S28 (MH "Unconscious (Psychology)")
- S27 (MH "Professional-Patient Relations+")
- S26 (MH "Attitude of Health Personnel+")
- S25 (MH "Prejudice+")
- S24 S17 OR S18 OR S19 OR S20 OR S21 OR S22 OR S23
- S23 AB (treatment\* N2 (select\* or recommend\* or receipt))
- S22 TI (treatment\* N2 (select\* or recommend\* or receipt))
- S21 AB ((Clinical or medical or health or treatment\*) N2 (decision\* or decid\* or option\* or choice\*))
- S20 TI ((Clinical or medical or health or treatment\*) N2 (decision\* or decid\* or option\* or choice\*))
- S19 (MH "Disease Management")
- S18 (MH "Decision Making+")
- S17 (MH "Decision Making, Clinical+")
- S16 S1 OR S2 OR S3 OR S4 OR S5 OR S6 OR S7 OR S8 OR S9 OR S10 OR S11 OR S12 OR S13 OR S14 OR S15
- S15 AB SES
- S14 TI SES
- S13 AB (sociodemographic or socio demographic or income or wealth or poverty or affluen\*)

S12 TI (sociodemographic or socio demographic or income or wealth or poverty or affluen\*)

S11 AB ((social or socio economic or socioeconomic or economic or income) N4 (deprivat\* or advantage\* or disadvantage\* or disparit\* or status or class or position or hierach\* or determinant\* or inequalit\* or inequit\* or barrier\* or circumstance\*))

S10 TI ((social or socio economic or socioeconomic or economic or income) N4 (deprivat\* or advantage\* or disadvantage\* or disparit\* or status or class or position or hierach\* or determinant\* or inequalit\* or inequit\* or barrier\* or circumstance\*))

S9 (MH "Economic Status")

S8 (MH "Poverty Areas")

S7 (MH "Poverty+")

S6 (MH "Healthcare Disparities")

S5 (MH "Health Status Disparities")

S4 (MH "Social Class+")

S3 (MH "Unemployment")

S2 (MH "Employment+")

S1 (MH "Socioeconomic Factors+")
