# Supplementary material for: Health professionals implicit bias of patients with low socioeconomic status (SES) and its effects on clinical decision-making: a scoping review
Source: PubMed Central journal article supplement — BMJ Open. 2024 Jul 2;14(7):e081723. doi: 10.1136/bmjopen-2023-081723 (PMC11227794; doi:10.1136/bmjopen-2023-081723), 2024-07-02
Supplement: bmjopen-2023-081723supp002.pdf [file bmjopen-2023-081723supp002.pdf]

## Supplementary Material 2. Scoping Review Data Extraction Tool

Adapted from the JBI Scoping Review Data Extraction tool<sup>20</sup>

| Scoping Review Details                                                               |                                                                                                                                                                                                                                                                                                                                                                                                          |
|--------------------------------------------------------------------------------------|----------------------------------------------------------------------------------------------------------------------------------------------------------------------------------------------------------------------------------------------------------------------------------------------------------------------------------------------------------------------------------------------------------|
| <b>Scoping Review title:</b>                                                         | Health Professionals implicit bias of patients with low socioeconomic status (SES) and its effects on clinical decision-making: A Systematic Scoping Review                                                                                                                                                                                                                                              |
| <b>Review objective/s:</b>                                                           | To scope the reported impact of HP bias about SES on clinical decision making and its effect on the care for people with lower SES in wider literature                                                                                                                                                                                                                                                   |
| <b>Review question/s:</b>                                                            | <ul style="list-style-type: none"> <li>• RQ1: What has been published about implicit SES bias and HP attitudes or behaviours when deciding/providing care.</li> <li>• RQ2: How does SES effect the dynamics of the HP and patient relationship?</li> <li>• RQ3: What recommendations for practice have been postulated, implemented, or evaluated to address HP implicit bias related to SES.</li> </ul> |
| Inclusion/Exclusion Criteria                                                         |                                                                                                                                                                                                                                                                                                                                                                                                          |
| <b>Population:</b> Adults                                                            |                                                                                                                                                                                                                                                                                                                                                                                                          |
| <b>Concept:</b> SES                                                                  |                                                                                                                                                                                                                                                                                                                                                                                                          |
| <b>Context:</b> HP decision making                                                   |                                                                                                                                                                                                                                                                                                                                                                                                          |
| <b>Types of publication or evidence source</b>                                       |                                                                                                                                                                                                                                                                                                                                                                                                          |
| Evidence source Details and Characteristics                                          |                                                                                                                                                                                                                                                                                                                                                                                                          |
| <b>Citation details (e.g., author/s, date, title, journal, volume, issue, pages)</b> |                                                                                                                                                                                                                                                                                                                                                                                                          |
| <b>Country</b>                                                                       |                                                                                                                                                                                                                                                                                                                                                                                                          |
| <b>Context – professional group</b>                                                  |                                                                                                                                                                                                                                                                                                                                                                                                          |
| <b>Disease group (if applicable)</b>                                                 |                                                                                                                                                                                                                                                                                                                                                                                                          |
| <b>Participants (details e.g., age/sex and number)</b>                               |                                                                                                                                                                                                                                                                                                                                                                                                          |
| <b>SES Terminology used.</b>                                                         |                                                                                                                                                                                                                                                                                                                                                                                                          |
| Details/Results extracted from source of evidence                                    |                                                                                                                                                                                                                                                                                                                                                                                                          |
| <b>SES effect on HP and patient relationship</b>                                     |                                                                                                                                                                                                                                                                                                                                                                                                          |

Page 2 of 2

|                                                                                                                                                           |  |
|-----------------------------------------------------------------------------------------------------------------------------------------------------------|--|
| <b>Implicit biases, attitudes or behaviours that connect SES and decision making</b>                                                                      |  |
| <b>Healthcare professionals' decision making, and the impact of the decisions made<br/>Types of Healthcare professionals, care context and/or setting</b> |  |
| <b>Recommendations for practice to mitigate bias</b>                                                                                                      |  |
| <b>Identify how SES was measured in the included papers.</b>                                                                                              |  |

Page 2 of 2
